# Supplementary material for: Structural and expression divergence of WAK/WAKL receptor-like kinases in Phaseolus vulgaris reveals candidate mediators of resistance to Colletotrichum lindemuthianum
Source: Research Square preprint supplement (doi:10.21203/rs.3.rs-7274720/v1), 2025-10-20
Supplement: Supplementary file 1 [file f7bcc34611350b3c3ef2a9c5.xlsx]

## Sheet: Summary
Sheet	Description
1	Table S1. Annotation of the Pkinase domain (PF00069) in WAK/WAKL proteins from Phaseolus vulgaris.
2	Table S2. Annotation of the PK_Tyr_Ser-Thr domain (PF07714) in WAK/WAKL proteins from Phaseolus vulgaris.
3	Table S3. Annotation of the WAK domain (PF08488) in WAK/WAKL proteins from Phaseolus vulgaris.
4	Table S4. Annotation of the GUB_WAK_bind domain (PF13947) in WAK/WAKL proteins from Phaseolus vulgaris.
5	Table S5. Annotation of the WAK_assoc domain (PF14380) in WAK/WAKL proteins from Phaseolus vulgaris.
6	Table S6. Annotation of the EGF domain (PF14380) in WAK/WAKL protein from Phaseolus vulgaris
7	Table S7. Annotation of the EGF_CA domain (PF07645) in WAK/WAKL proteins from Phaseolus vulgaris.
8	Table S8. Annotation of the hEGF domain (PF12661) in WAK/WAKL proteins from Phaseolus vulgaris.
9	Table S9. Annotation of the cEGF domain (PF12661) in WAK/WAKL proteins from Phaseolus vulgaris.
10	Table S10. Protein size, biochemical features, membrane topology, and localization predictions for HvWAKL, PvWAK, and PvWAKL proteins.
11	Table S11. Protein domains in six HvWAKL, seven PvWAK, and forty-two PvWAKL proteins identified using the NCBI Conserved Domain Database (CDD).
12	Table S12. Structural motifs of six HvWAKL, seven PvWAK, and forty-two PvWAKL proteins as identified by MEME Suite.
13	Table S13. Gene structure (intron–exon) organization of HvWAKL, PvWAK, and PvWAKL proteins.
14	Table S14. Cis-regulatory elements according to PlantCARE by gene, category, and CRE.
15	Table S15. Syntenic gene pairs between Phaseolus vulgaris and Arabidopsis thaliana, and Phaseolus vulgaris and Glycine max.
16	Table S16. Log₂ fold changes of PvWAK/WAKL genes in resistant (Ouro Vermelho) and susceptible (Estilo) common bean cultivars at 0, 48, and 96 hours post-inoculation with Colletotrichum lindemuthianum.
17	Table S17. WAK/WAKL and Related Proteins: Species, Experimental/Stress Conditions, Literature References, and Sequences

## Sheet: Table S1
Table S1. Annotation of the Pkinase domain (PF00069) in WAK/WAKL proteins from Phaseolus vulgaris.
Cover	Target_name	accession	tlen	Query_name	accession	qlen	E-value	score	bias	#	of	c-Evalue	i-Evalue	score	bias	from	to	from	to	from	to	acc	Cover
>50%	Phvul.008G039400.1	-	515	Pkinase	PF00069.30	263	1.5e-82	277.9	0	1	1	1.3e-83	2.6e-82	277.2	0	1	263	19	271	19	271	0.96	100
	Phvul.008G039400.2	-	515	Pkinase	PF00069.30	263	1.5e-82	277.9	0	1	1	1.3e-83	2.6e-82	277.2	0	1	263	19	271	19	271	0.96	100
	Phvul.004G032000.1	-	515	Pkinase	PF00069.30	263	1e-81	275.2	0	1	1	9e-83	1.8e-81	274.4	0	1	263	20	272	20	272	0.96	100
	Phvul.004G032000.2	-	528	Pkinase	PF00069.30	263	1.1e-81	275.1	0	1	1	9.6e-83	1.9e-81	274.3	0	1	263	33	285	33	285	0.96	100
	Phvul.009G160100.1	-	496	Pkinase	PF00069.30	263	2.4e-81	274	0	1	1	1.7e-82	3.6e-81	273.4	0	1	263	30	288	30	288	0.95	100
	Phvul.007G253300.1	-	516	Pkinase	PF00069.30	263	3.8e-81	273.4	0	1	1	3.6e-82	7.2e-81	272.4	0	1	263	43	301	43	301	0.97	100
	Phvul.001G135300.1	-	538	Pkinase	PF00069.30	263	2.3e-80	270.8	0	1	1	1.8e-81	3.7e-80	270.1	0	1	263	59	317	59	317	0.96	100
	Phvul.007G241300.1	-	1340	Pkinase	PF00069.30	263	6.2e-80	269.4	0.1	1	1	7.2e-81	1.5e-79	268.2	0	1	263	6	256	6	256	0.95	100
	Phvul.006G174900.1	-	436	Pkinase	PF00069.30	263	8.9e-80	268.9	0.1	1	1	5.9e-81	1.2e-79	268.4	0.1	1	263	10	264	10	264	0.94	100
	Phvul.010G160900.1	-	443	Pkinase	PF00069.30	263	1.1e-79	268.5	0	1	1	7.7e-81	1.6e-79	268.1	0	1	263	20	274	20	274	0.96	100
	Phvul.008G201900.1	-	521	Pkinase	PF00069.30	263	1.8e-79	267.9	0.4	1	1	2.2e-80	4.4e-79	266.6	0	1	263	66	324	66	324	0.97	100
	Phvul.002G279300.1	-	505	Pkinase	PF00069.30	263	3.9e-79	266.8	0	1	1	2.9e-80	6e-79	266.2	0	1	263	31	289	31	289	0.96	100
	Phvul.002G202100.1	-	294	Pkinase	PF00069.30	263	1.7e-78	264.6	0	1	1	9.6e-80	2e-78	264.5	0	1	263	4	287	4	287	0.95	100
	Phvul.007G241300.2	-	1346	Pkinase	PF00069.30	263	1.7e-78	264.6	0.1	1	1	2e-79	4e-78	263.4	0	1	263	6	262	6	262	0.95	100
	Phvul.005G181900.2	-	328	Pkinase	PF00069.30	263	2.3e-78	264.2	0	1	1	1.3e-79	2.7e-78	264	0	1	263	23	277	23	277	0.95	100
	Phvul.008G266600.1	-	525	Pkinase	PF00069.30	263	3.6e-78	263.6	0	1	1	3.5e-79	7.2e-78	262.6	0	1	263	78	336	78	336	0.96	100
	Phvul.001G003300.1	-	380	Pkinase	PF00069.30	263	4.6e-78	263.2	0	1	1	2.8e-79	5.7e-78	262.9	0	1	263	73	331	73	331	0.97	100
	Phvul.006G015300.1	-	544	Pkinase	PF00069.30	263	5.1e-78	263.1	0	1	1	6.4e-79	1.3e-77	261.8	0	1	263	88	346	88	346	0.97	100
	Phvul.005G181900.1	-	458	Pkinase	PF00069.30	263	5.5e-78	263	0	1	1	3.6e-79	7.3e-78	262.6	0	1	263	23	277	23	277	0.95	100
	Phvul.001G002800.4	-	521	Pkinase	PF00069.30	263	1.3e-77	261.8	0.1	1	1	1.4e-78	2.8e-77	260.7	0	1	263	70	328	70	328	0.97	100
	Phvul.006G122800.1	-	294	Pkinase	PF00069.30	263	1.3e-77	261.8	0	1	1	7.3e-79	1.5e-77	261.6	0	1	263	4	287	4	287	0.95	100
	Phvul.001G002800.2	-	527	Pkinase	PF00069.30	263	1.8e-77	261.3	0	1	1	1.9e-78	3.9e-77	260.2	0	1	263	76	334	76	334	0.96	100
	Phvul.001G002800.3	-	527	Pkinase	PF00069.30	263	1.8e-77	261.3	0	1	1	1.9e-78	3.9e-77	260.2	0	1	263	76	334	76	334	0.96	100
	Phvul.003G194100.1	-	537	Pkinase	PF00069.30	263	1.9e-77	261.2	0	1	1	1.3e-78	2.6e-77	260.8	0	1	263	55	313	55	313	0.96	100
	Phvul.007G089200.1	-	491	Pkinase	PF00069.30	263	1.9e-77	261.2	0	1	1	1.4e-78	2.8e-77	260.7	0	1	263	24	282	24	282	0.97	100
	Phvul.010G118300.1	-	436	Pkinase	PF00069.30	263	6.3e-77	259.5	0	1	1	4.6e-78	9.3e-77	259	0	1	263	15	268	15	268	0.94	100
	Phvul.006G076200.1	-	462	Pkinase	PF00069.30	263	6.8e-77	259.4	0	1	1	4.4e-78	8.9e-77	259	0	1	263	12	266	12	266	0.94	100
	Phvul.009G087500.1	-	446	Pkinase	PF00069.30	263	8e-77	259.2	0	1	1	5e-78	1e-76	258.9	0	1	263	11	265	11	265	0.93	100
	Phvul.006G043700.2	-	549	Pkinase	PF00069.30	263	1.4e-76	258.4	0	1	1	1.2e-77	2.4e-76	257.6	0	1	263	96	354	96	354	0.96	100
	Phvul.008G248900.1	-	443	Pkinase	PF00069.30	263	1.5e-76	258.3	0	1	1	9.9e-78	2e-76	257.9	0	1	263	12	266	12	266	0.93	100
	Phvul.002G238800.1	-	512	Pkinase	PF00069.30	263	1.7e-76	258.1	0	1	1	1.1e-77	2.2e-76	257.8	0	1	263	21	275	21	275	0.94	100
	Phvul.010G067600.1	-	467	Pkinase	PF00069.30	263	2.5e-76	257.6	0	1	1	1.5e-77	3.1e-76	257.3	0	1	263	12	266	12	266	0.94	100
	Phvul.009G213000.1	-	457	Pkinase	PF00069.30	263	2.6e-76	257.5	0	1	1	1.7e-77	3.5e-76	257.1	0	1	263	20	275	20	275	0.94	100
	Phvul.007G107300.1	-	282	Pkinase	PF00069.30	263	2.7e-76	257.4	0.1	1	1	1.5e-77	3.1e-76	257.2	0.1	1	263	21	272	21	272	0.95	100
	Phvul.001G248700.1	-	443	Pkinase	PF00069.30	263	3.1e-76	257.3	0	1	1	1.9e-77	3.9e-76	256.9	0	1	263	12	266	12	266	0.95	100
	Phvul.008G081400.1	-	475	Pkinase	PF00069.30	263	5.4e-76	256.5	0.1	1	1	3.4e-77	6.9e-76	256.1	0.1	1	263	146	402	146	402	0.96	100
	Phvul.007G266100.1	-	582	Pkinase	PF00069.30	263	5.5e-76	256.4	0	1	1	4e-77	8.2e-76	255.9	0	1	263	117	375	117	375	0.96	100
	Phvul.008G292500.1	-	562	Pkinase	PF00069.30	263	5.9e-76	256.3	0	1	1	4.3e-77	8.8e-76	255.8	0	1	263	99	357	99	357	0.97	100
	Phvul.010G048600.1	-	276	Pkinase	PF00069.30	263	8e-76	255.9	0.1	1	1	4.4e-77	9.1e-76	255.7	0.1	1	263	14	265	14	265	0.94	100
	Phvul.002G002200.1	-	338	Pkinase	PF00069.30	263	9.3e-76	255.7	0	1	1	6.7e-77	1.4e-75	255.1	0	1	263	6	262	6	262	0.95	100
	Phvul.002G002200.2	-	338	Pkinase	PF00069.30	263	9.3e-76	255.7	0	1	1	6.7e-77	1.4e-75	255.1	0	1	263	6	262	6	262	0.95	100
	Phvul.008G186700.1	-	442	Pkinase	PF00069.30	263	1.2e-75	255.3	0	1	1	7.5e-77	1.5e-75	255	0	1	263	159	415	159	415	0.96	100
	Phvul.008G186700.2	-	442	Pkinase	PF00069.30	263	1.2e-75	255.3	0	1	1	7.5e-77	1.5e-75	255	0	1	263	159	415	159	415	0.96	100
	Phvul.009G206900.1	-	438	Pkinase	PF00069.30	263	2.7e-75	254.2	0	1	1	1.8e-76	3.6e-75	253.7	0	1	263	21	275	21	275	0.94	100
	Phvul.002G131400.1	-	451	Pkinase	PF00069.30	263	3.4e-75	253.8	0	1	1	2e-76	4.1e-75	253.6	0	1	263	4	283	4	283	0.9	100
	Phvul.008G151806.1	-	274	Pkinase	PF00069.30	263	7.7e-75	252.7	0	1	1	4.2e-76	8.6e-75	252.5	0	1	263	9	264	9	264	0.97	100
	Phvul.003G078400.1	-	546	Pkinase	PF00069.30	263	8.3e-75	252.6	0	1	1	1e-75	2e-74	251.3	0	1	263	91	349	91	349	0.97	100
	Phvul.006G174800.1	-	507	Pkinase	PF00069.30	263	8.3e-75	252.6	0	1	1	5.2e-76	1.1e-74	252.2	0	1	263	32	286	32	286	0.94	100
	Phvul.003G148600.1	-	469	Pkinase	PF00069.30	263	8.7e-75	252.5	0	1	1	7.1e-76	1.4e-74	251.8	0	1	263	10	262	10	262	0.94	100
	Phvul.008G184400.1	-	446	Pkinase	PF00069.30	263	1e-74	252.3	0	1	1	7.8e-76	1.6e-74	251.6	0	1	263	9	262	9	262	0.93	100
	Phvul.008G184400.2	-	446	Pkinase	PF00069.30	263	1e-74	252.3	0	1	1	7.8e-76	1.6e-74	251.6	0	1	263	9	262	9	262	0.93	100
	Phvul.003G279600.1	-	448	Pkinase	PF00069.30	263	1.1e-74	252.1	0	1	1	6.9e-76	1.4e-74	251.8	0	1	263	4	283	4	283	0.89	100
	Phvul.003G121600.1	-	421	Pkinase	PF00069.30	263	1.4e-74	251.9	0	1	1	9e-76	1.8e-74	251.4	0	1	263	6	261	6	261	0.94	100
	Phvul.008G205700.1	-	441	Pkinase	PF00069.30	263	2.3e-74	251.1	0	1	1	1.8e-75	3.6e-74	250.5	0	1	263	13	268	13	268	0.92	100
	Phvul.008G205700.2	-	441	Pkinase	PF00069.30	263	2.3e-74	251.1	0	1	1	1.8e-75	3.6e-74	250.5	0	1	263	13	268	13	268	0.92	100
	Phvul.008G205700.3	-	441	Pkinase	PF00069.30	263	2.3e-74	251.1	0	1	1	1.8e-75	3.6e-74	250.5	0	1	263	13	268	13	268	0.92	100
	Phvul.008G205700.4	-	441	Pkinase	PF00069.30	263	2.3e-74	251.1	0	1	1	1.8e-75	3.6e-74	250.5	0	1	263	13	268	13	268	0.92	100
	Phvul.009G220200.3	-	385	Pkinase	PF00069.30	263	2.7e-74	250.9	0	1	1	1.7e-75	3.4e-74	250.6	0	1	263	19	274	19	274	0.94	100
	Phvul.009G220200.6	-	385	Pkinase	PF00069.30	263	2.7e-74	250.9	0	1	1	1.7e-75	3.4e-74	250.6	0	1	263	19	274	19	274	0.94	100
	Phvul.009G220200.2	-	428	Pkinase	PF00069.30	263	3.5e-74	250.5	0	1	1	2.3e-75	4.7e-74	250.1	0	1	263	19	274	19	274	0.94	100
	Phvul.009G220200.1	-	458	Pkinase	PF00069.30	263	4.1e-74	250.3	0	1	1	2.8e-75	5.6e-74	249.9	0	1	263	19	274	19	274	0.94	100
	Phvul.001G197700.1	-	575	Pkinase	PF00069.30	263	6.1e-74	249.7	0	1	1	5.3e-75	1.1e-73	248.9	0	1	263	110	368	110	368	0.96	100
	Phvul.011G055400.1	-	539	Pkinase	PF00069.30	263	1.2e-73	248.8	0	1	1	1e-74	2.1e-73	248	0	1	263	67	325	67	325	0.96	100
	Phvul.003G156900.1	-	433	Pkinase	PF00069.30	263	1.3e-73	248.7	0	1	1	8e-75	1.6e-73	248.3	0	1	263	23	277	23	277	0.93	100
	Phvul.009G145400.2	-	444	Pkinase	PF00069.30	263	1.7e-73	248.3	0	1	1	1.2e-74	2.4e-73	247.8	0	1	263	9	262	9	262	0.94	100
	Phvul.008G205500.1	-	520	Pkinase	PF00069.30	263	1.7e-73	248.3	0.2	1	1	1.2e-74	2.4e-73	247.8	0	1	263	25	324	25	324	0.93	100
	Phvul.009G145400.1	-	446	Pkinase	PF00069.30	263	1.7e-73	248.3	0	1	1	1.2e-74	2.4e-73	247.8	0	1	263	9	262	9	262	0.94	100
	Phvul.006G105900.1	-	274	Pkinase	PF00069.30	263	1.8e-73	248.2	0	1	1	9.9e-75	2e-73	248	0	1	263	13	268	13	268	0.96	100
	Phvul.003G246000.1	-	575	Pkinase	PF00069.30	263	2e-73	248.1	0	1	1	1.4e-74	2.8e-73	247.5	0	1	263	122	384	122	384	0.94	100
	Phvul.011G030800.2	-	1378	Pkinase	PF00069.30	263	2e-73	248	0	1	1	1.8e-74	3.8e-73	247.1	0	1	263	20	274	20	274	0.95	100
	Phvul.002G175700.1	-	749	Pkinase	PF00069.30	263	2.1e-73	248	0	1	1	1.3e-74	2.7e-73	247.6	0	1	263	403	694	403	694	0.95	100
	Phvul.002G175700.2	-	749	Pkinase	PF00069.30	263	2.1e-73	248	0	1	1	1.3e-74	2.7e-73	247.6	0	1	263	403	694	403	694	0.95	100
	Phvul.003G246000.2	-	603	Pkinase	PF00069.30	263	2.3e-73	247.9	0	1	1	1.6e-74	3.2e-73	247.4	0	1	263	122	384	122	384	0.94	100
	Phvul.010G023600.1	-	436	Pkinase	PF00069.30	263	2.4e-73	247.8	0	1	1	1.7e-74	3.4e-73	247.3	0	1	263	4	284	4	284	0.93	100
	Phvul.003G293600.1	-	416	Pkinase	PF00069.30	263	2.9e-73	247.5	0	1	1	1.8e-74	3.7e-73	247.2	0	1	263	81	337	81	337	0.94	100
	Phvul.001G002900.1	-	511	Pkinase	PF00069.30	263	6.4e-73	246.4	0	1	1	6.7e-74	1.4e-72	245.3	0	1	263	73	328	73	328	0.95	100
	Phvul.003G247000.1	-	360	Pkinase	PF00069.30	263	8.8e-73	245.9	0	1	1	5.3e-74	1.1e-72	245.6	0	1	263	23	279	23	279	0.94	100
	Phvul.003G195500.1	-	417	Pkinase	PF00069.30	263	1.2e-72	245.5	0.1	1	1	7e-74	1.4e-72	245.2	0.1	1	263	86	346	86	346	0.95	100
	Phvul.003G165700.1	-	452	Pkinase	PF00069.30	263	1.5e-72	245.2	0	1	1	9.7e-74	2e-72	244.8	0	1	263	17	270	17	270	0.94	100
	Phvul.003G225800.1	-	338	Pkinase	PF00069.30	263	1.6e-72	245.1	0	1	1	9.8e-74	2e-72	244.8	0	1	263	5	261	5	261	0.94	100
	Phvul.008G248800.1	-	427	Pkinase	PF00069.30	263	1.8e-72	244.9	0	1	1	1.1e-73	2.2e-72	244.6	0	1	263	18	272	18	272	0.91	100
	Phvul.010G015100.4	-	655	Pkinase	PF00069.30	263	2.1e-72	244.7	0	1	1	1.5e-73	3.1e-72	244.1	0	1	263	14	271	14	271	0.93	100
	Phvul.002G261200.1	-	341	Pkinase	PF00069.30	263	2.1e-72	244.7	0	1	1	1.3e-73	2.7e-72	244.3	0	1	263	4	260	4	260	0.94	100
	Phvul.008G084600.1	-	461	Pkinase	PF00069.30	263	2.6e-72	244.4	0	1	1	1.7e-73	3.5e-72	244	0	1	263	12	266	12	266	0.96	100
	Phvul.010G015100.3	-	717	Pkinase	PF00069.30	263	2.6e-72	244.4	0	1	1	1.9e-73	3.8e-72	243.8	0	1	263	14	271	14	271	0.93	100
	Phvul.010G015100.2	-	733	Pkinase	PF00069.30	263	2.7e-72	244.3	0	1	1	2e-73	4e-72	243.8	0	1	263	14	271	14	271	0.93	100
	Phvul.006G020900.1	-	440	Pkinase	PF00069.30	263	3.2e-72	244.1	0	1	1	2.7e-73	5.5e-72	243.3	0	1	263	13	268	13	268	0.92	100
	Phvul.006G020900.2	-	440	Pkinase	PF00069.30	263	3.2e-72	244.1	0	1	1	2.7e-73	5.5e-72	243.3	0	1	263	13	268	13	268	0.92	100
	Phvul.006G020900.4	-	440	Pkinase	PF00069.30	263	3.2e-72	244.1	0	1	1	2.7e-73	5.5e-72	243.3	0	1	263	13	268	13	268	0.92	100
	Phvul.006G020900.5	-	440	Pkinase	PF00069.30	263	3.2e-72	244.1	0	1	1	2.7e-73	5.5e-72	243.3	0	1	263	13	268	13	268	0.92	100
	Phvul.006G020900.6	-	440	Pkinase	PF00069.30	263	3.2e-72	244.1	0	1	1	2.7e-73	5.5e-72	243.3	0	1	263	13	268	13	268	0.92	100
	Phvul.006G020900.7	-	440	Pkinase	PF00069.30	263	3.2e-72	244.1	0	1	1	2.7e-73	5.5e-72	243.3	0	1	263	13	268	13	268	0.92	100
	Phvul.006G020900.8	-	440	Pkinase	PF00069.30	263	3.2e-72	244.1	0	1	1	2.7e-73	5.5e-72	243.3	0	1	263	13	268	13	268	0.92	100
	Phvul.006G020900.9	-	440	Pkinase	PF00069.30	263	3.2e-72	244.1	0	1	1	2.7e-73	5.5e-72	243.3	0	1	263	13	268	13	268	0.92	100
	Phvul.006G020500.1	-	521	Pkinase	PF00069.30	263	3.4e-72	244	0	1	1	2.3e-73	4.8e-72	243.5	0	1	263	25	324	25	324	0.91	100
	Phvul.003G012300.1	-	364	Pkinase	PF00069.30	263	4.4e-72	243.6	0	1	1	2.8e-73	5.6e-72	243.3	0	1	263	23	279	23	279	0.94	100
	Phvul.002G020800.1	-	589	Pkinase	PF00069.30	263	5e-72	243.4	0	1	1	3.2e-73	6.6e-72	243.1	0	1	263	137	399	137	399	0.92	100
	Phvul.003G261700.4	-	525	Pkinase	PF00069.30	263	5.3e-72	243.4	0	1	1	3.8e-73	7.8e-72	242.8	0	1	263	67	327	67	327	0.95	100
	Phvul.003G261700.1	-	527	Pkinase	PF00069.30	263	5.4e-72	243.4	0	1	1	3.9e-73	7.9e-72	242.8	0	1	263	67	327	67	327	0.95	100
	Phvul.003G261700.2	-	527	Pkinase	PF00069.30	263	5.4e-72	243.4	0	1	1	3.9e-73	7.9e-72	242.8	0	1	263	67	327	67	327	0.95	100
	Phvul.003G261700.3	-	527	Pkinase	PF00069.30	263	5.4e-72	243.4	0	1	1	3.9e-73	7.9e-72	242.8	0	1	263	67	327	67	327	0.95	100
	Phvul.006G216400.1	-	351	Pkinase	PF00069.30	263	5.9e-72	243.2	0	1	1	3.6e-73	7.3e-72	242.9	0	1	263	4	260	4	260	0.94	100
	Phvul.008G085000.2	-	385	Pkinase	PF00069.30	263	9.5e-72	242.6	0	1	1	5.6e-73	1.1e-71	242.3	0	1	263	30	285	30	285	0.95	100
	Phvul.006G076600.1	-	437	Pkinase	PF00069.30	263	1.3e-71	242.1	0	1	1	8.1e-73	1.7e-71	241.8	0	1	263	18	272	18	272	0.93	100
	Phvul.L001678.1	-	270	Pkinase	PF00069.30	263	1.3e-71	242.1	0	1	1	7.5e-73	1.5e-71	241.9	0	1	263	9	263	9	263	0.96	100
	Phvul.008G176300.1	-	339	Pkinase	PF00069.30	263	1.4e-71	242	0	1	1	8.1e-73	1.7e-71	241.8	0	1	263	4	260	4	260	0.94	100
	Phvul.009G050100.1	-	593	Pkinase	PF00069.30	263	1.6e-71	241.8	0	1	1	1.1e-72	2.2e-71	241.4	0	1	263	139	401	139	401	0.93	100
	Phvul.009G157800.1	-	351	Pkinase	PF00069.30	263	1.7e-71	241.7	0	1	1	1.1e-72	2.2e-71	241.4	0	1	263	4	260	4	260	0.94	100
	Phvul.003G165700.4	-	342	Pkinase	PF00069.30	263	1.8e-71	241.6	0	1	1	1.1e-72	2.2e-71	241.3	0	1	263	17	268	17	268	0.93	100
	Phvul.007G243100.1	-	577	Pkinase	PF00069.30	263	2.7e-71	241.1	0	1	1	1.8e-72	3.6e-71	240.7	0	1	263	123	385	123	385	0.93	100
	Phvul.003G165700.2	-	450	Pkinase	PF00069.30	263	3.9e-71	240.6	0	1	1	2.5e-72	5.1e-71	240.2	0	1	263	17	268	17	268	0.93	100
	Phvul.002G021600.1	-	359	Pkinase	PF00069.30	263	7.9e-71	239.5	0	1	1	5.3e-72	1.1e-70	239.1	0	1	263	21	277	21	277	0.95	100
	Phvul.001G121501.1	-	580	Pkinase	PF00069.30	263	8.5e-71	239.4	0	1	1	5.4e-72	1.1e-70	239.1	0	1	263	126	388	126	388	0.94	100
	Phvul.010G117600.1	-	588	Pkinase	PF00069.30	263	8.9e-71	239.4	0	1	1	5.6e-72	1.1e-70	239	0	1	263	136	398	136	398	0.93	100
	Phvul.009G034700.1	-	468	Pkinase	PF00069.30	263	1.9e-70	238.3	0	1	1	1.1e-71	2.3e-70	238	0	1	263	109	357	109	357	0.94	100
	Phvul.003G041000.3	-	729	Pkinase	PF00069.30	263	1e-69	235.9	0	1	1	7.4e-71	1.5e-69	235.3	0	1	263	252	506	252	506	0.95	100
	Phvul.003G041000.4	-	729	Pkinase	PF00069.30	263	1e-69	235.9	0	1	1	7.4e-71	1.5e-69	235.3	0	1	263	252	506	252	506	0.95	100
	Phvul.003G041000.2	-	833	Pkinase	PF00069.30	263	1.3e-69	235.6	0	1	1	9.7e-71	2e-69	235	0	1	263	252	506	252	506	0.95	100
	Phvul.003G041000.1	-	834	Pkinase	PF00069.30	263	1.3e-69	235.6	0	1	1	9.7e-71	2e-69	234.9	0	1	263	252	506	252	506	0.95	100
	Phvul.002G034800.1	-	636	Pkinase	PF00069.30	263	2.9e-69	234.4	0	1	1	2.1e-70	4.3e-69	233.8	0	1	263	146	430	146	430	0.9	100
	Phvul.009G138300.1	-	592	Pkinase	PF00069.30	263	3.7e-69	234	0	1	1	2.8e-70	5.8e-69	233.4	0	1	263	130	410	130	410	0.88	100
	Phvul.001G000500.1	-	312	Pkinase	PF00069.30	263	7.2e-69	233.1	0	1	1	4.1e-70	8.3e-69	232.9	0	1	263	14	304	14	304	0.93	100
	Phvul.004G032200.1	-	601	Pkinase	PF00069.30	263	2.4e-68	231.4	0	1	1	1.6e-69	3.3e-68	230.9	0	1	263	109	393	109	393	0.91	100
	Phvul.007G279600.1	-	422	Pkinase	PF00069.30	263	2.1e-67	228.3	0	1	1	2.6e-68	5.4e-67	227	0	1	263	14	269	14	269	0.94	100
	Phvul.006G161400.1	-	544	Pkinase	PF00069.30	263	2.3e-67	228.2	0	1	1	1.5e-68	3e-67	227.8	0	1	263	108	392	108	392	0.91	100
	Phvul.003G187700.1	-	665	Pkinase	PF00069.30	263	2.8e-67	227.9	0	1	1	1.9e-68	3.8e-67	227.5	0	1	263	95	379	95	379	0.91	100
	Phvul.006G220500.2	-	581	Pkinase	PF00069.30	263	5e-67	227.1	0	1	1	3.4e-68	7e-67	226.6	0	1	263	137	421	137	421	0.91	100
	Phvul.002G283400.1	-	542	Pkinase	PF00069.30	263	6.2e-67	226.8	0	1	1	3.9e-68	8e-67	226.4	0	1	263	80	364	80	364	0.91	100
	Phvul.008G039800.3	-	648	Pkinase	PF00069.30	263	7.1e-67	226.6	0	1	1	4.7e-68	9.6e-67	226.1	0	1	263	105	389	105	389	0.91	100
	Phvul.008G039800.2	-	667	Pkinase	PF00069.30	263	7.4e-67	226.5	0	1	1	5.1e-68	1e-66	226	0	1	263	105	389	105	389	0.91	100
	Phvul.008G039800.5	-	670	Pkinase	PF00069.30	263	7.4e-67	226.5	0	1	1	5.1e-68	1e-66	226	0	1	263	105	389	105	389	0.91	100
	Phvul.008G039800.1	-	670	Pkinase	PF00069.30	263	7.5e-67	226.5	0	1	1	5.1e-68	1e-66	226	0	1	263	105	389	105	389	0.91	100
	Phvul.008G039800.4	-	673	Pkinase	PF00069.30	263	7.5e-67	226.5	0	1	1	5.2e-68	1.1e-66	226	0	1	263	105	389	105	389	0.91	100
	Phvul.005G071900.1	-	708	Pkinase	PF00069.30	263	1e-66	226.1	0	1	1	7.3e-68	1.5e-66	225.5	0	1	263	131	415	131	415	0.91	100
	Phvul.011G098200.1	-	1034	Pkinase	PF00069.30	263	1.2e-66	225.9	0	1	1	8.6e-68	1.8e-66	225.3	0	1	263	8	262	8	262	0.92	100
	Phvul.005G120700.2	-	1010	Pkinase	PF00069.30	263	1.9e-66	225.2	0	1	1	1.6e-67	3.3e-66	224.4	0	1	263	8	262	8	262	0.92	100
	Phvul.011G119100.1	-	699	Pkinase	PF00069.30	263	2e-66	225.1	0	1	1	1.3e-67	2.7e-66	224.7	0	1	263	135	419	135	419	0.91	100
	Phvul.011G119100.2	-	699	Pkinase	PF00069.30	263	2e-66	225.1	0	1	1	1.3e-67	2.7e-66	224.7	0	1	263	135	419	135	419	0.91	100
	Phvul.005G120700.1	-	1039	Pkinase	PF00069.30	263	2e-66	225.1	0	1	1	1.7e-67	3.5e-66	224.3	0	1	263	8	262	8	262	0.92	100
	Phvul.001G022300.2	-	485	Pkinase	PF00069.30	263	2.6e-66	224.7	0	1	1	1.8e-65	3.6e-64	217.7	0	1	263	108	408	108	408	0.95	100
	Phvul.003G138278.1	-	439	Pkinase	PF00069.30	263	2.6e-66	224.7	0	1	1	1.6e-67	3.4e-66	224.4	0	1	263	24	280	24	280	0.93	100
	Phvul.009G184700.1	-	681	Pkinase	PF00069.30	263	2.8e-66	224.6	0	1	1	1.9e-67	3.9e-66	224.1	0	1	263	110	394	110	394	0.92	100
	Phvul.009G184700.2	-	681	Pkinase	PF00069.30	263	2.8e-66	224.6	0	1	1	1.9e-67	3.9e-66	224.1	0	1	263	110	394	110	394	0.92	100
	Phvul.001G022300.1	-	521	Pkinase	PF00069.30	263	3.3e-66	224.4	0	1	1	2.2e-65	4.4e-64	217.4	0	1	263	108	408	108	408	0.95	100
	Phvul.003G100900.1	-	547	Pkinase	PF00069.30	263	3.7e-66	224.2	0	1	1	2.3e-67	4.6e-66	223.9	0	1	263	97	381	97	381	0.91	100
	Phvul.007G082900.1	-	597	Pkinase	PF00069.30	263	4e-66	224.1	0	1	1	2.7e-67	5.4e-66	223.7	0	1	263	137	419	137	419	0.9	100
	Phvul.008G191500.2	-	606	Pkinase	PF00069.30	263	7.3e-66	223.3	0	1	1	5.2e-67	1.1e-65	222.7	0	1	263	18	309	18	309	0.88	100
	Phvul.008G191500.1	-	613	Pkinase	PF00069.30	263	7.5e-66	223.2	0	1	1	5.4e-67	1.1e-65	222.7	0	1	263	25	316	25	316	0.88	100
	Phvul.006G097500.1	-	578	Pkinase	PF00069.30	263	8.5e-66	223	0	1	1	5.4e-67	1.1e-65	222.7	0	1	263	116	400	116	400	0.91	100
	Phvul.006G155300.1	-	563	Pkinase	PF00069.30	263	2.3e-65	221.6	0	1	1	1.6e-66	3.3e-65	221.1	0	1	263	25	316	25	316	0.88	100
	Phvul.002G275500.1	-	461	Pkinase	PF00069.30	263	2.6e-65	221.4	0	1	1	1.5e-66	3.1e-65	221.2	0	1	263	18	327	18	327	0.9	100
	Phvul.002G275500.2	-	461	Pkinase	PF00069.30	263	2.6e-65	221.4	0	1	1	1.5e-66	3.1e-65	221.2	0	1	263	18	327	18	327	0.9	100
	Phvul.006G033600.1	-	602	Pkinase	PF00069.30	263	3e-65	221.2	0	1	1	2.3e-66	4.6e-65	220.6	0	1	263	13	304	13	304	0.87	100
	Phvul.006G033600.2	-	602	Pkinase	PF00069.30	263	3e-65	221.2	0	1	1	2.3e-66	4.6e-65	220.6	0	1	263	13	304	13	304	0.87	100
	Phvul.003G095900.1	-	569	Pkinase	PF00069.30	263	3.1e-65	221.2	0	1	1	2.1e-66	4.3e-65	220.7	0	1	263	25	316	25	316	0.87	100
	Phvul.003G095900.2	-	569	Pkinase	PF00069.30	263	3.1e-65	221.2	0	1	1	2.1e-66	4.3e-65	220.7	0	1	263	25	316	25	316	0.87	100
	Phvul.009G163500.1	-	557	Pkinase	PF00069.30	263	6.3e-65	220.2	0	1	1	3.9e-66	8e-65	219.8	0	1	263	94	378	94	378	0.9	100
	Phvul.004G151200.1	-	505	Pkinase	PF00069.30	263	7.9e-65	219.9	0	1	1	6.1e-66	1.2e-64	219.2	0	1	263	23	314	23	314	0.89	100
	Phvul.002G328300.1	-	582	Pkinase	PF00069.30	263	1.1e-64	219.4	0	1	1	1.4e-65	2.8e-64	218.1	0	1	263	100	391	100	391	0.88	100
	Phvul.008G253500.1	-	314	Pkinase	PF00069.30	263	4e-64	217.6	0	1	1	2.3e-65	4.7e-64	217.3	0	1	263	4	306	4	306	0.94	100
	Phvul.010G090200.1	-	469	Pkinase	PF00069.30	263	8.3e-64	216.5	0	1	1	5.6e-65	1.1e-63	216.1	0	1	263	140	424	140	424	0.88	100
	Phvul.002G012700.1	-	333	Pkinase	PF00069.30	263	1.6e-63	215.6	0.1	1	1	9e-65	1.8e-63	215.4	0.1	1	263	34	319	34	319	0.9	100
	Phvul.003G237100.1	-	404	Pkinase	PF00069.30	263	2.2e-63	215.2	0.1	1	1	1.3e-64	2.6e-63	214.9	0.1	1	263	105	390	105	390	0.9	100
	Phvul.003G235900.1	-	413	Pkinase	PF00069.30	263	3.6e-63	214.4	0	1	1	2.1e-64	4.3e-63	214.2	0	1	263	114	399	114	399	0.92	100
	Phvul.008G072800.1	-	466	Pkinase	PF00069.30	263	5.5e-63	213.8	0.1	1	1	3.5e-64	7.1e-63	213.5	0.1	1	263	137	421	137	421	0.88	100
	Phvul.009G089900.1	-	380	Pkinase	PF00069.30	263	6.5e-63	213.6	0	1	1	3.8e-64	7.8e-63	213.3	0	1	263	40	324	40	324	0.88	100
	Phvul.007G204000.1	-	410	Pkinase	PF00069.30	263	1.9e-62	212.1	0	1	1	1.1e-63	2.3e-62	211.8	0	1	263	74	358	74	358	0.86	100
	Phvul.007G204000.2	-	410	Pkinase	PF00069.30	263	1.9e-62	212.1	0	1	1	1.1e-63	2.3e-62	211.8	0	1	263	74	358	74	358	0.86	100
	Phvul.006G174500.1	-	380	Pkinase	PF00069.30	263	3.9e-62	211	0	1	1	2.3e-63	4.7e-62	210.8	0	1	263	40	324	40	324	0.88	100
	Phvul.L001755.1	-	402	Pkinase	PF00069.30	263	4e-62	211	0	1	1	2.4e-63	4.8e-62	210.7	0	1	263	66	350	66	350	0.87	100
	Phvul.006G000033.2	-	705	Pkinase	PF00069.30	263	5.8e-62	210.5	0	1	1	6.4e-63	1.3e-61	209.3	0	1	263	18	279	18	279	0.92	100
	Phvul.006G000033.1	-	725	Pkinase	PF00069.30	263	6e-62	210.4	0	1	1	6.8e-63	1.4e-61	209.2	0	1	263	18	279	18	279	0.92	100
	Phvul.005G069800.1	-	606	Pkinase	PF00069.30	263	7.1e-62	210.2	0	1	1	4.9e-63	1e-61	209.7	0	1	263	25	316	25	316	0.89	100
	Phvul.007G184200.1	-	583	Pkinase	PF00069.30	263	1e-61	209.7	0	1	1	6.6e-63	1.3e-61	209.3	0	1	263	123	407	123	407	0.9	100
	Phvul.007G184200.2	-	583	Pkinase	PF00069.30	263	1e-61	209.7	0	1	1	6.6e-63	1.3e-61	209.3	0	1	263	123	407	123	407	0.9	100
	Phvul.005G094100.3	-	378	Pkinase	PF00069.30	263	1.4e-61	209.2	0	1	1	8e-63	1.6e-61	209	0	1	263	36	320	36	320	0.86	100
	Phvul.005G094100.4	-	378	Pkinase	PF00069.30	263	1.4e-61	209.2	0	1	1	8e-63	1.6e-61	209	0	1	263	36	320	36	320	0.86	100
	Phvul.005G094100.1	-	425	Pkinase	PF00069.30	263	2e-61	208.7	0	1	1	1.2e-62	2.4e-61	208.5	0	1	263	83	367	83	367	0.86	100
	Phvul.011G128000.2	-	374	Pkinase	PF00069.30	263	5.2e-61	207.4	0	1	1	3e-62	6.2e-61	207.1	0	1	263	34	318	34	318	0.86	100
	Phvul.011G128000.1	-	419	Pkinase	PF00069.30	263	7.3e-61	206.9	0	1	1	4.3e-62	8.9e-61	206.6	0	1	263	79	363	79	363	0.86	100
	Phvul.L005401.1	-	703	Pkinase	PF00069.30	263	1.1e-60	206.3	0	1	1	8.3e-62	1.7e-60	205.7	0	1	263	13	274	13	274	0.92	100
	Phvul.005G094100.2	-	423	Pkinase	PF00069.30	263	3.2e-60	204.7	0	1	1	1.9e-61	3.9e-60	204.5	0	1	263	83	365	83	365	0.86	100
	Phvul.005G158900.1	-	464	Pkinase	PF00069.30	263	3.8e-60	204.5	0	1	1	2.5e-61	5e-60	204.1	0	1	263	22	290	22	290	0.93	100
	Phvul.008G210200.2	-	662	Pkinase	PF00069.30	263	6.3e-60	203.8	0.6	1	1	5.7e-61	1.2e-59	202.9	0	1	263	384	657	384	657	0.89	100
	Phvul.004G012600.1	-	668	Pkinase	PF00069.30	263	6.8e-60	203.7	0	1	1	5.1e-61	1e-59	203.1	0	1	263	16	277	16	277	0.91	100
	Phvul.008G210200.1	-	679	Pkinase	PF00069.30	263	6.9e-60	203.7	0.6	1	1	6e-61	1.2e-59	202.9	0	1	263	401	674	401	674	0.89	100
	Phvul.005G135922.1	-	409	Pkinase	PF00069.30	263	9.3e-59	200	0	1	1	5.6e-60	1.1e-58	199.7	0	1	263	117	378	117	378	0.94	100
	Phvul.005G135922.2	-	409	Pkinase	PF00069.30	263	9.3e-59	200	0	1	1	5.6e-60	1.1e-58	199.7	0	1	263	117	378	117	378	0.94	100
	Phvul.002G179600.4	-	390	Pkinase	PF00069.30	263	3.8e-55	188.1	0	1	1	2.3e-56	4.6e-55	187.8	0	1	263	24	288	24	288	0.91	100
	Phvul.002G179600.1	-	448	Pkinase	PF00069.30	263	5.6e-55	187.6	0	1	1	3.4e-56	6.9e-55	187.3	0	1	263	24	288	24	288	0.91	100
	Phvul.009G121600.3	-	719	Pkinase	PF00069.30	263	1.6e-54	186	0	1	1	2.1e-55	4.3e-54	184.7	0	1	263	341	634	341	634	0.91	100
	Phvul.009G121600.4	-	698	Pkinase	PF00069.30	263	1.7e-54	186	0.1	1	1	2e-55	4.1e-54	184.8	0.1	1	263	320	613	320	613	0.91	100
	Phvul.009G121600.1	-	749	Pkinase	PF00069.30	263	1.8e-54	185.9	0	1	1	2.3e-55	4.7e-54	184.5	0	1	263	371	664	371	664	0.91	100
	Phvul.009G121600.2	-	728	Pkinase	PF00069.30	263	1.9e-54	185.9	0	1	1	2.2e-55	4.5e-54	184.6	0	1	263	350	643	350	643	0.91	100
	Phvul.009G104800.1	-	395	Pkinase	PF00069.30	263	1.6e-51	176.2	0	1	1	2.1e-52	4.3e-51	174.8	0	1	263	66	391	66	391	0.85	100
	Phvul.009G104800.3	-	395	Pkinase	PF00069.30	263	1.6e-51	176.2	0	1	1	2.1e-52	4.3e-51	174.8	0	1	263	66	391	66	391	0.85	100
	Phvul.002G332700.1	-	1182	Pkinase	PF00069.30	263	3e-51	175.4	0	1	1	2.5e-52	5.1e-51	174.6	0	1	263	871	1173	871	1173	0.86	100
	Phvul.003G206300.1	-	430	Pkinase	PF00069.30	263	1.1e-50	173.5	0	1	1	1.4e-50	2.8e-49	168.9	0	1	263	98	423	98	423	0.85	100
	Phvul.004G145100.1	-	1178	Pkinase	PF00069.30	263	1.6e-50	173	0	1	1	1.2e-51	2.5e-50	172.4	0	1	263	867	1169	867	1169	0.85	100
	Phvul.003G206200.1	-	430	Pkinase	PF00069.30	263	2.1e-50	172.6	0	1	1	2.7e-50	5.6e-49	167.9	0	1	263	98	423	98	423	0.85	100
	Phvul.003G275500.1	-	947	Pkinase	PF00069.30	263	2.4e-49	169.1	0	1	1	1.1e-49	2.3e-48	165.9	0	1	263	123	466	123	466	0.88	100
	Phvul.003G275500.2	-	934	Pkinase	PF00069.30	263	6.6e-48	164.4	0	1	1	7.2e-49	1.5e-47	163.3	0	1	263	123	453	123	453	0.87	100
	Phvul.003G043900.1	-	1006	Pkinase	PF00069.30	263	6.5e-47	161.1	0	1	1	6e-48	1.2e-46	160.2	0	1	263	688	1003	688	1003	0.85	100
	Phvul.003G043900.2	-	1016	Pkinase	PF00069.30	263	6.7e-47	161.1	0	1	1	6.2e-48	1.3e-46	160.2	0	1	263	688	1003	688	1003	0.85	100
	Phvul.001G204900.1	-	495	Pkinase	PF00069.30	263	2.1e-45	156.2	0	1	1	1.4e-46	3e-45	155.7	0	1	263	240	484	240	484	0.91	100
	Phvul.009G190566.1	-	550	Pkinase	PF00069.30	263	1.3e-79	268.3	0	1	1	1.1e-80	2.2e-79	267.6	0	2	263	69	326	68	326	0.96	99.6198
	Phvul.007G265100.1	-	582	Pkinase	PF00069.30	263	2e-77	261.1	0	1	1	1.5e-78	3e-77	260.6	0	2	263	137	394	136	394	0.97	99.6198
	Phvul.007G233900.1	-	581	Pkinase	PF00069.30	263	7.3e-77	259.3	0	1	1	5.4e-78	1.1e-76	258.7	0	2	263	119	376	118	376	0.97	99.6198
	Phvul.002G294500.1	-	519	Pkinase	PF00069.30	263	1.5e-76	258.3	0.1	1	1	1e-76	2e-75	254.6	0	2	263	67	324	66	324	0.97	99.6198
	Phvul.008G098400.1	-	531	Pkinase	PF00069.30	263	2.5e-76	257.5	0	1	1	1.7e-77	3.4e-76	257.1	0	2	263	58	315	57	315	0.96	99.6198
	Phvul.002G161200.1	-	502	Pkinase	PF00069.30	263	3.4e-76	257.1	0.1	1	1	1.8e-76	3.6e-75	253.8	0	2	263	56	312	55	312	0.96	99.6198
	Phvul.009G150500.1	-	612	Pkinase	PF00069.30	263	3.6e-75	253.8	0	1	1	2.2e-76	4.4e-75	253.5	0	2	263	214	469	213	469	0.96	99.6198
	Phvul.004G122500.1	-	519	Pkinase	PF00069.30	263	2.8e-74	250.8	0	1	1	1.8e-75	3.6e-74	250.5	0	2	263	43	300	42	300	0.94	99.6198
	Phvul.004G122500.3	-	519	Pkinase	PF00069.30	263	2.8e-74	250.8	0	1	1	1.8e-75	3.6e-74	250.5	0	2	263	43	300	42	300	0.94	99.6198
	Phvul.003G294300.1	-	599	Pkinase	PF00069.30	263	6.2e-74	249.7	0	1	1	4.1e-75	8.4e-74	249.3	0	2	263	146	407	145	407	0.93	99.6198
	Phvul.007G072801.1	-	923	Pkinase	PF00069.30	263	1.1e-73	249	0	1	1	7e-75	1.4e-73	248.5	0	2	263	436	691	435	691	0.95	99.6198
	Phvul.007G072801.2	-	923	Pkinase	PF00069.30	263	1.1e-73	249	0	1	1	7e-75	1.4e-73	248.5	0	2	263	436	691	435	691	0.95	99.6198
	Phvul.004G112000.1	-	896	Pkinase	PF00069.30	263	3.2e-73	247.4	0	1	1	2.2e-74	4.5e-73	246.9	0	2	263	411	666	410	666	0.95	99.6198
	Phvul.006G091500.1	-	653	Pkinase	PF00069.30	263	5.3e-73	246.6	0	1	1	4.2e-74	8.6e-73	246	0	2	263	66	328	65	328	0.94	99.6198
	Phvul.006G211800.1	-	454	Pkinase	PF00069.30	263	2.7e-72	244.4	0	1	1	1.7e-73	3.4e-72	244	0	2	263	182	434	181	434	0.94	99.6198
	Phvul.002G290600.2	-	1168	Pkinase	PF00069.30	263	6.7e-72	243	0	1	1	4.8e-73	9.8e-72	242.5	0	2	263	401	656	400	656	0.95	99.6198
	Phvul.003G209300.2	-	451	Pkinase	PF00069.30	263	2.3e-71	241.3	0	1	1	1.4e-72	2.8e-71	241	0	2	263	143	432	142	432	0.93	99.6198
	Phvul.003G209300.3	-	451	Pkinase	PF00069.30	263	2.3e-71	241.3	0	1	1	1.4e-72	2.8e-71	241	0	2	263	143	432	142	432	0.93	99.6198
	Phvul.003G209300.4	-	451	Pkinase	PF00069.30	263	2.3e-71	241.3	0	1	1	1.4e-72	2.8e-71	241	0	2	263	143	432	142	432	0.93	99.6198
	Phvul.003G209300.5	-	451	Pkinase	PF00069.30	263	2.3e-71	241.3	0	1	1	1.4e-72	2.8e-71	241	0	2	263	143	432	142	432	0.93	99.6198
	Phvul.003G209300.6	-	451	Pkinase	PF00069.30	263	2.3e-71	241.3	0	1	1	1.4e-72	2.8e-71	241	0	2	263	143	432	142	432	0.93	99.6198
	Phvul.003G209300.7	-	451	Pkinase	PF00069.30	263	2.3e-71	241.3	0	1	1	1.4e-72	2.8e-71	241	0	2	263	143	432	142	432	0.93	99.6198
	Phvul.003G209300.8	-	451	Pkinase	PF00069.30	263	2.3e-71	241.3	0	1	1	1.4e-72	2.8e-71	241	0	2	263	143	432	142	432	0.93	99.6198
	Phvul.007G053700.1	-	624	Pkinase	PF00069.30	263	2.6e-71	241.1	0	1	1	1.8e-72	3.6e-71	240.6	0	2	263	51	313	50	313	0.92	99.6198
	Phvul.002G108700.1	-	569	Pkinase	PF00069.30	263	4.3e-70	237.1	0	1	1	3e-71	6.1e-70	236.6	0	2	263	109	368	108	368	0.94	99.6198
	Phvul.001G137000.8	-	582	Pkinase	PF00069.30	263	2.8e-69	234.5	0	1	1	2.8e-70	5.8e-69	233.4	0	1	262	16	269	16	270	0.93	99.6198
	Phvul.001G137000.7	-	627	Pkinase	PF00069.30	263	3e-69	234.4	0	1	1	3.3e-70	6.8e-69	233.2	0	1	262	4	257	4	258	0.93	99.6198
	Phvul.001G137000.1	-	639	Pkinase	PF00069.30	263	3.2e-69	234.3	0	1	1	3.5e-70	7.1e-69	233.1	0	1	262	16	269	16	270	0.93	99.6198
	Phvul.001G137000.4	-	639	Pkinase	PF00069.30	263	3.2e-69	234.3	0	1	1	3.5e-70	7.1e-69	233.1	0	1	262	16	269	16	270	0.93	99.6198
	Phvul.001G137000.5	-	639	Pkinase	PF00069.30	263	3.2e-69	234.3	0	1	1	3.5e-70	7.1e-69	233.1	0	1	262	16	269	16	270	0.93	99.6198
	Phvul.001G137000.6	-	639	Pkinase	PF00069.30	263	3.2e-69	234.3	0	1	1	3.5e-70	7.1e-69	233.1	0	1	262	16	269	16	270	0.93	99.6198
	Phvul.001G137000.2	-	664	Pkinase	PF00069.30	263	3.5e-69	234.1	0	1	1	3.8e-70	7.7e-69	233	0	1	262	41	294	41	295	0.93	99.6198
	Phvul.001G137000.3	-	664	Pkinase	PF00069.30	263	3.5e-69	234.1	0	1	1	3.8e-70	7.7e-69	233	0	1	262	41	294	41	295	0.93	99.6198
	Phvul.009G025700.1	-	579	Pkinase	PF00069.30	263	6e-69	233.4	0	1	1	4e-70	8.1e-69	232.9	0	2	263	307	559	306	559	0.93	99.6198
	Phvul.009G025700.2	-	579	Pkinase	PF00069.30	263	6e-69	233.4	0	1	1	4e-70	8.1e-69	232.9	0	2	263	307	559	306	559	0.93	99.6198
	Phvul.002G202400.1	-	499	Pkinase	PF00069.30	263	6.6e-69	233.2	0	1	1	4e-70	8.2e-69	232.9	0	2	263	226	479	225	479	0.93	99.6198
	Phvul.005G074300.1	-	698	Pkinase	PF00069.30	263	7.5e-69	233.1	0	1	1	5.6e-70	1.1e-68	232.5	0	2	263	16	267	15	267	0.94	99.6198
	Phvul.011G164700.2	-	697	Pkinase	PF00069.30	263	9.2e-69	232.8	0	1	1	7.1e-70	1.4e-68	232.1	0	2	263	16	267	15	267	0.94	99.6198
	Phvul.011G164700.3	-	697	Pkinase	PF00069.30	263	9.2e-69	232.8	0	1	1	7.1e-70	1.4e-68	232.1	0	2	263	16	267	15	267	0.94	99.6198
	Phvul.011G164700.1	-	698	Pkinase	PF00069.30	263	9.2e-69	232.8	0	1	1	7.1e-70	1.5e-68	232.1	0	2	263	16	267	15	267	0.94	99.6198
	Phvul.011G164700.4	-	698	Pkinase	PF00069.30	263	9.2e-69	232.8	0	1	1	7.1e-70	1.5e-68	232.1	0	2	263	16	267	15	267	0.94	99.6198
	Phvul.008G168100.1	-	584	Pkinase	PF00069.30	263	5.9e-68	230.1	0	1	1	3.8e-69	7.7e-68	229.7	0	2	263	313	565	312	565	0.93	99.6198
	Phvul.004G174500.1	-	354	Pkinase	PF00069.30	263	9.8e-68	229.4	0	1	1	5.6e-69	1.1e-67	229.2	0	2	263	70	329	69	329	0.93	99.6198
	Phvul.005G103400.1	-	700	Pkinase	PF00069.30	263	2.5e-67	228.1	0	1	1	1.6e-68	3.3e-67	227.7	0	2	263	136	419	135	419	0.92	99.6198
	Phvul.009G062400.1	-	679	Pkinase	PF00069.30	263	2.6e-67	228	0	1	1	1.7e-68	3.4e-67	227.6	0	2	263	297	557	296	557	0.93	99.6198
	Phvul.003G246500.4	-	633	Pkinase	PF00069.30	263	5.3e-67	227	0	1	1	3.6e-68	7.3e-67	226.5	0	2	263	306	563	305	563	0.93	99.6198
	Phvul.003G246500.3	-	634	Pkinase	PF00069.30	263	5.4e-67	227	0	1	1	3.6e-68	7.4e-67	226.5	0	2	263	306	563	305	563	0.93	99.6198
	Phvul.002G021100.5	-	606	Pkinase	PF00069.30	263	6.7e-67	226.7	0	1	1	4.3e-68	8.7e-67	226.3	0	2	263	343	603	342	603	0.94	99.6198
	Phvul.002G021100.6	-	606	Pkinase	PF00069.30	263	6.7e-67	226.7	0	1	1	4.3e-68	8.7e-67	226.3	0	2	263	343	603	342	603	0.94	99.6198
	Phvul.003G246500.6	-	600	Pkinase	PF00069.30	263	8.1e-67	226.4	0	1	1	5.1e-68	1e-66	226	0	2	263	270	530	269	530	0.93	99.6198
	Phvul.003G246500.5	-	601	Pkinase	PF00069.30	263	8.2e-67	226.4	0	1	1	5.1e-68	1e-66	226	0	2	263	270	530	269	530	0.93	99.6198
	Phvul.003G246500.2	-	636	Pkinase	PF00069.30	263	8.6e-67	226.3	0	1	1	5.8e-68	1.2e-66	225.8	0	2	263	306	566	305	566	0.93	99.6198
	Phvul.003G246500.1	-	637	Pkinase	PF00069.30	263	8.6e-67	226.3	0	1	1	5.8e-68	1.2e-66	225.8	0	2	263	306	566	305	566	0.93	99.6198
	Phvul.010G163000.1	-	363	Pkinase	PF00069.30	263	3.1e-66	224.5	0	1	1	1.8e-67	3.6e-66	224.3	0	2	263	81	335	80	335	0.92	99.6198
	Phvul.001G019100.1	-	683	Pkinase	PF00069.30	263	3.2e-66	224.4	0	1	1	2.2e-67	4.5e-66	224	0	2	263	308	568	307	568	0.93	99.6198
	Phvul.004G149200.1	-	1293	Pkinase	PF00069.30	263	7.9e-66	223.1	0	1	1	2.7e-66	5.6e-65	220.4	0	2	263	883	1171	882	1171	0.94	99.6198
	Phvul.006G220800.1	-	341	Pkinase	PF00069.30	263	1.1e-65	222.7	0	1	1	6.3e-67	1.3e-65	222.4	0	2	263	16	264	15	264	0.93	99.6198
	Phvul.006G160500.1	-	1369	Pkinase	PF00069.30	263	2.8e-65	221.3	0	1	1	2.4e-66	4.9e-65	220.6	0	1	262	4	256	4	257	0.94	99.6198
	Phvul.001G162200.1	-	543	Pkinase	PF00069.30	263	1.8e-64	218.7	0.1	1	1	7.6e-64	1.6e-62	212.3	0.1	2	263	121	415	120	415	0.95	99.6198
	Phvul.007G186800.1	-	620	Pkinase	PF00069.30	263	2.6e-64	218.2	0	1	1	1.8e-65	3.6e-64	217.7	0	1	262	4	257	4	258	0.92	99.6198
	Phvul.011G004700.1	-	1167	Pkinase	PF00069.30	263	3.2e-64	217.9	0	1	1	5.7e-65	1.2e-63	216.1	0	2	263	768	1053	767	1053	0.93	99.6198
	Phvul.001G154300.2	-	604	Pkinase	PF00069.30	263	4.9e-64	217.3	0	1	1	3.4e-65	6.9e-64	216.8	0	1	262	4	257	4	258	0.92	99.6198
	Phvul.001G154300.3	-	604	Pkinase	PF00069.30	263	4.9e-64	217.3	0	1	1	3.4e-65	6.9e-64	216.8	0	1	262	4	257	4	258	0.92	99.6198
	Phvul.001G154300.1	-	643	Pkinase	PF00069.30	263	5.7e-64	217.1	0	1	1	3.9e-65	7.9e-64	216.6	0	1	262	43	296	43	297	0.92	99.6198
	Phvul.007G174200.1	-	610	Pkinase	PF00069.30	263	5.3e-63	213.9	0	1	1	3.7e-64	7.6e-63	213.4	0	1	262	4	257	4	258	0.92	99.6198
	Phvul.007G174200.2	-	610	Pkinase	PF00069.30	263	5.3e-63	213.9	0	1	1	3.7e-64	7.6e-63	213.4	0	1	262	4	257	4	258	0.92	99.6198
	Phvul.007G255900.1	-	961	Pkinase	PF00069.30	263	1.9e-62	212.1	0	1	1	1.4e-63	2.9e-62	211.5	0	1	262	10	263	10	264	0.94	99.6198
	Phvul.002G138400.1	-	341	Pkinase	PF00069.30	263	3.7e-61	207.8	0	1	1	2.1e-62	4.3e-61	207.6	0	2	263	63	334	62	334	0.93	99.6198
	Phvul.011G102000.1	-	354	Pkinase	PF00069.30	263	8e-54	183.8	0	1	1	4.7e-55	9.6e-54	183.5	0	2	263	4	253	3	253	0.89	99.6198
	Phvul.007G242000.1	-	298	Pkinase	PF00069.30	263	1.5e-48	166.5	0	1	1	8.7e-50	1.8e-48	166.3	0	2	263	5	270	4	270	0.84	99.6198
	Phvul.007G026100.1	-	982	Pkinase	PF00069.30	263	1.8e-46	159.7	0	1	1	1.4e-47	2.8e-46	159.1	0	2	263	665	979	664	979	0.86	99.6198
	Phvul.007G026100.2	-	982	Pkinase	PF00069.30	263	1.8e-46	159.7	0	1	1	1.4e-47	2.8e-46	159.1	0	2	263	665	979	664	979	0.86	99.6198
	Phvul.009G112600.1	-	295	Pkinase	PF00069.30	263	1.2e-73	248.8	0	1	1	6.6e-75	1.3e-73	248.6	0	3	263	34	283	32	283	0.95	99.2395
	Phvul.002G326800.3	-	376	Pkinase	PF00069.30	263	4.6e-71	240.3	0	1	1	2.7e-72	5.4e-71	240.1	0	3	263	16	294	14	294	0.93	99.2395
	Phvul.002G326800.1	-	386	Pkinase	PF00069.30	263	5e-71	240.2	0	1	1	2.9e-72	5.9e-71	239.9	0	3	263	16	294	14	294	0.93	99.2395
	Phvul.003G134100.1	-	356	Pkinase	PF00069.30	263	7e-71	239.7	0	1	1	4e-72	8.2e-71	239.5	0	3	263	72	332	70	332	0.92	99.2395
	Phvul.006G212500.1	-	396	Pkinase	PF00069.30	263	1.2e-70	239	0	1	1	7.2e-72	1.5e-70	238.6	0	3	263	120	371	118	371	0.94	99.2395
	Phvul.002G249300.1	-	310	Pkinase	PF00069.30	263	2.8e-69	234.5	0	1	1	2.2e-70	4.5e-69	233.8	0	3	263	7	260	5	260	0.91	99.2395
	Phvul.009G061000.1	-	371	Pkinase	PF00069.30	263	1.1e-68	232.5	0	1	1	6.6e-70	1.4e-68	232.2	0	3	263	34	319	32	319	0.91	99.2395
	Phvul.009G229800.1	-	356	Pkinase	PF00069.30	263	1.4e-68	232.1	0	1	1	8.3e-70	1.7e-68	231.9	0	3	263	72	332	70	332	0.93	99.2395
	Phvul.004G152000.1	-	410	Pkinase	PF00069.30	263	1.8e-68	231.8	0	1	1	1.1e-69	2.2e-68	231.5	0	3	263	16	294	14	294	0.92	99.2395
	Phvul.002G237500.1	-	368	Pkinase	PF00069.30	263	2.8e-67	227.9	0	1	1	1.8e-68	3.6e-67	227.5	0	3	263	34	319	32	319	0.92	99.2395
	Phvul.002G237500.2	-	368	Pkinase	PF00069.30	263	2.8e-67	227.9	0	1	1	1.8e-68	3.6e-67	227.5	0	3	263	34	319	32	319	0.92	99.2395
	Phvul.004G147800.1	-	317	Pkinase	PF00069.30	263	1.4e-64	219.1	0	1	1	7.8e-66	1.6e-64	218.9	0	3	263	50	310	48	310	0.91	99.2395
	Phvul.011G070300.12	-	975	Pkinase	PF00069.30	263	1.9e-63	215.4	0	1	1	1.7e-64	3.4e-63	214.5	0	3	263	648	933	646	933	0.96	99.2395
	Phvul.011G070300.4	-	975	Pkinase	PF00069.30	263	1.9e-63	215.4	0	1	1	1.7e-64	3.4e-63	214.5	0	3	263	648	933	646	933	0.96	99.2395
	Phvul.011G070300.5	-	975	Pkinase	PF00069.30	263	1.9e-63	215.4	0	1	1	1.7e-64	3.4e-63	214.5	0	3	263	648	933	646	933	0.96	99.2395
	Phvul.011G070300.1	-	976	Pkinase	PF00069.30	263	1.9e-63	215.4	0	1	1	1.7e-64	3.4e-63	214.5	0	3	263	648	933	646	933	0.96	99.2395
	Phvul.011G070300.10	-	976	Pkinase	PF00069.30	263	1.9e-63	215.4	0	1	1	1.7e-64	3.4e-63	214.5	0	3	263	648	933	646	933	0.96	99.2395
	Phvul.011G070300.11	-	976	Pkinase	PF00069.30	263	1.9e-63	215.4	0	1	1	1.7e-64	3.4e-63	214.5	0	3	263	648	933	646	933	0.96	99.2395
	Phvul.011G070300.6	-	976	Pkinase	PF00069.30	263	1.9e-63	215.4	0	1	1	1.7e-64	3.4e-63	214.5	0	3	263	648	933	646	933	0.96	99.2395
	Phvul.011G070300.7	-	976	Pkinase	PF00069.30	263	1.9e-63	215.4	0	1	1	1.7e-64	3.4e-63	214.5	0	3	263	648	933	646	933	0.96	99.2395
	Phvul.011G070300.9	-	976	Pkinase	PF00069.30	263	1.9e-63	215.4	0	1	1	1.7e-64	3.4e-63	214.5	0	3	263	648	933	646	933	0.96	99.2395
	Phvul.006G219700.1	-	420	Pkinase	PF00069.30	263	5.1e-62	210.7	0	1	1	3.2e-63	6.5e-62	210.3	0	3	263	84	366	82	366	0.86	99.2395
	Phvul.002G239600.2	-	364	Pkinase	PF00069.30	263	1.4e-61	209.2	0	1	1	8.5e-63	1.7e-61	208.9	0	3	263	36	308	34	308	0.85	99.2395
	Phvul.002G239600.3	-	364	Pkinase	PF00069.30	263	1.4e-61	209.2	0	1	1	8.5e-63	1.7e-61	208.9	0	3	263	36	308	34	308	0.85	99.2395
	Phvul.002G239600.4	-	364	Pkinase	PF00069.30	263	1.4e-61	209.2	0	1	1	8.5e-63	1.7e-61	208.9	0	3	263	36	308	34	308	0.85	99.2395
	Phvul.002G239600.5	-	364	Pkinase	PF00069.30	263	1.4e-61	209.2	0	1	1	8.5e-63	1.7e-61	208.9	0	3	263	36	308	34	308	0.85	99.2395
	Phvul.002G239600.1	-	372	Pkinase	PF00069.30	263	1.5e-61	209.1	0	1	1	9.1e-63	1.9e-61	208.8	0	3	263	44	316	42	316	0.85	99.2395
	Phvul.010G163200.4	-	494	Pkinase	PF00069.30	263	4.9e-61	207.4	0	1	1	5e-62	1e-60	206.4	0	3	263	24	283	22	283	0.91	99.2395
	Phvul.010G163200.3	-	507	Pkinase	PF00069.30	263	5.3e-61	207.3	0	1	1	5.3e-62	1.1e-60	206.3	0	3	263	24	283	22	283	0.91	99.2395
	Phvul.010G163200.2	-	696	Pkinase	PF00069.30	263	1.2e-60	206.2	0	1	1	1.1e-61	2.3e-60	205.2	0	3	263	24	283	22	283	0.91	99.2395
	Phvul.010G163200.1	-	703	Pkinase	PF00069.30	263	1.2e-60	206.1	0	1	1	1.1e-61	2.3e-60	205.2	0	3	263	24	283	22	283	0.91	99.2395
	Phvul.011G078300.1	-	412	Pkinase	PF00069.30	263	4.8e-57	194.3	0	1	1	3e-58	6e-57	194	0	3	263	123	382	121	382	0.94	99.2395
	Phvul.006G069600.1	-	444	Pkinase	PF00069.30	263	5.9e-56	190.8	0	1	1	7.3e-57	1.5e-55	189.5	0	3	263	7	259	5	259	0.91	99.2395
	Phvul.008G259700.1	-	447	Pkinase	PF00069.30	263	2.8e-53	182	0	1	1	1.9e-54	3.9e-53	181.5	0	3	263	6	259	4	259	0.92	99.2395
	Phvul.002G270000.1	-	642	Pkinase	PF00069.30	263	4e-53	181.5	0	1	1	3.4e-54	6.9e-53	180.7	0	3	263	35	290	33	290	0.91	99.2395
	Phvul.006G148000.1	-	453	Pkinase	PF00069.30	263	1.3e-52	179.8	0	1	1	8e-54	1.6e-52	179.5	0	2	262	4	247	3	248	0.89	99.2395
	Phvul.008G223700.1	-	719	Pkinase	PF00069.30	263	1.6e-51	176.2	0.2	1	1	1.3e-52	2.6e-51	175.6	0.2	3	263	415	715	413	715	0.84	99.2395
	Phvul.002G018100.1	-	341	Pkinase	PF00069.30	263	2.9e-51	175.4	0	1	1	1.7e-52	3.4e-51	175.2	0	3	263	5	263	3	263	0.88	99.2395
	Phvul.011G054400.1	-	1234	Pkinase	PF00069.30	263	1.1e-48	166.9	0	1	1	2e-49	4e-48	165.1	0	1	261	420	722	420	723	0.92	99.2395
	Phvul.011G054400.2	-	1243	Pkinase	PF00069.30	263	1.2e-48	166.9	0	1	1	2e-49	4e-48	165.1	0	1	261	429	731	429	732	0.92	99.2395
	Phvul.006G077100.1	-	613	Pkinase	PF00069.30	263	2e-47	162.8	0	1	1	1.4e-48	2.8e-47	162.3	0	3	263	29	285	27	285	0.91	99.2395
	Phvul.002G117600.1	-	875	Pkinase	PF00069.30	263	1.1e-39	137.5	0	1	1	1.5e-40	3.1e-39	135.9	0	3	263	464	739	462	739	0.84	99.2395
	Phvul.002G272100.2	-	592	Pkinase	PF00069.30	263	1e-74	252.3	0	1	1	6.3e-76	1.3e-74	252	0	2	261	202	455	201	458	0.96	98.8593
	Phvul.002G272100.1	-	608	Pkinase	PF00069.30	263	1.1e-74	252.2	0	1	1	6.7e-76	1.4e-74	251.9	0	2	261	202	455	201	458	0.96	98.8593
	Phvul.010G120500.1	-	627	Pkinase	PF00069.30	263	3.5e-74	250.5	0	1	1	2.6e-75	5.3e-74	249.9	0	4	263	15	270	12	270	0.95	98.8593
	Phvul.008G178600.1	-	449	Pkinase	PF00069.30	263	8.7e-67	226.3	0	1	1	5.7e-68	1.2e-66	225.9	0	4	263	92	336	89	336	0.94	98.8593
	Phvul.L001848.5	-	674	Pkinase	PF00069.30	263	1.7e-64	218.8	0	1	1	2e-65	4e-64	217.6	0	4	263	342	629	339	629	0.96	98.8593
	Phvul.L001848.1	-	987	Pkinase	PF00069.30	263	4.2e-64	217.5	0	1	1	4.4e-65	8.9e-64	216.4	0	4	263	655	942	652	942	0.96	98.8593
	Phvul.L001848.2	-	987	Pkinase	PF00069.30	263	4.2e-64	217.5	0	1	1	4.4e-65	8.9e-64	216.4	0	4	263	655	942	652	942	0.96	98.8593
	Phvul.006G100400.1	-	625	Pkinase	PF00069.30	263	1.1e-61	209.6	0	1	1	7.2e-63	1.5e-61	209.2	0	1	260	4	255	4	258	0.92	98.8593
	Phvul.004G147900.1	-	322	Pkinase	PF00069.30	263	1.1e-61	209.5	0	1	1	6.4e-63	1.3e-61	209.3	0	4	263	50	315	47	315	0.91	98.8593
	Phvul.003G274800.1	-	996	Pkinase	PF00069.30	263	5.4e-60	204	0	1	1	5.8e-61	1.2e-59	202.9	0	4	263	664	947	661	947	0.95	98.8593
	Phvul.002G154800.6	-	584	Pkinase	PF00069.30	263	2.9e-56	191.8	0	1	1	2.3e-57	4.6e-56	191.1	0	3	262	316	567	314	568	0.92	98.8593
	Phvul.002G154800.5	-	591	Pkinase	PF00069.30	263	3e-56	191.7	0	1	1	2.3e-57	4.8e-56	191.1	0	3	262	323	574	321	575	0.92	98.8593
	Phvul.002G154800.4	-	680	Pkinase	PF00069.30	263	3.9e-56	191.4	0	1	1	3.2e-57	6.5e-56	190.6	0	3	262	412	663	410	664	0.92	98.8593
	Phvul.002G154800.3	-	680	Pkinase	PF00069.30	263	3.9e-56	191.4	0	1	1	3.2e-57	6.5e-56	190.6	0	3	262	412	663	410	664	0.92	98.8593
	Phvul.002G154800.1	-	687	Pkinase	PF00069.30	263	4e-56	191.3	0	1	1	3.3e-57	6.7e-56	190.6	0	3	262	419	670	417	671	0.92	98.8593
	Phvul.002G154800.2	-	730	Pkinase	PF00069.30	263	4.6e-56	191.1	0	1	1	3.7e-57	7.6e-56	190.4	0	3	262	462	713	460	714	0.92	98.8593
	Phvul.009G173100.1	-	596	Pkinase	PF00069.30	263	5.1e-53	181.1	0.2	1	1	3.9e-54	7.9e-53	180.5	0.2	4	263	30	285	28	285	0.92	98.8593
	Phvul.009G173100.2	-	596	Pkinase	PF00069.30	263	5.1e-53	181.1	0.2	1	1	3.9e-54	7.9e-53	180.5	0.2	4	263	30	285	28	285	0.92	98.8593
	Phvul.006G053100.1	-	299	Pkinase	PF00069.30	263	2.1e-52	179.1	0	1	1	1.3e-53	2.6e-52	178.8	0	4	263	30	285	28	285	0.9	98.8593
	Phvul.010G115800.2	-	662	Pkinase	PF00069.30	263	2.2e-52	179.1	0	1	1	1.7e-53	3.5e-52	178.4	0	4	263	41	295	38	295	0.9	98.8593
	Phvul.010G115800.1	-	663	Pkinase	PF00069.30	263	2.3e-52	179	0	1	1	1.7e-53	3.6e-52	178.4	0	4	263	41	295	38	295	0.9	98.8593
	Phvul.006G000200.1	-	618	Pkinase	PF00069.30	263	8.6e-52	177.1	0	1	1	7e-53	1.4e-51	176.4	0	4	263	19	273	16	273	0.91	98.8593
	Phvul.003G243300.1	-	344	Pkinase	PF00069.30	263	2.2e-51	175.8	0	1	1	1.3e-52	2.6e-51	175.6	0	4	263	6	264	3	264	0.87	98.8593
	Phvul.006G099700.1	-	736	Pkinase	PF00069.30	263	6.7e-51	174.2	0.1	1	1	5e-52	1e-50	173.6	0.1	4	263	27	281	25	281	0.9	98.8593
	Phvul.008G275100.1	-	306	Pkinase	PF00069.30	263	1.3e-50	173.3	0	1	1	7.7e-52	1.6e-50	173	0	4	263	43	298	41	298	0.89	98.8593
	Phvul.007G057000.1	-	731	Pkinase	PF00069.30	263	1.4e-50	173.2	0	1	1	1.3e-51	2.7e-50	172.2	0	4	263	27	281	25	281	0.91	98.8593
	Phvul.008G117700.1	-	672	Pkinase	PF00069.30	263	1.3e-44	153.6	0	1	1	8.6e-46	1.8e-44	153.2	0	1	260	334	603	334	604	0.81	98.8593
	Phvul.003G271000.3	-	750	Pkinase	PF00069.30	263	1.6e-36	127.1	0	1	1	1.7e-36	3.4e-35	122.7	0	4	263	331	614	328	614	0.83	98.8593
	Phvul.003G271000.1	-	875	Pkinase	PF00069.30	263	2.5e-36	126.4	0	1	1	2.3e-36	4.6e-35	122.3	0	4	263	456	739	453	739	0.83	98.8593
	Phvul.002G326800.4	-	306	Pkinase	PF00069.30	263	3.1e-70	237.6	0	1	1	1.7e-71	3.5e-70	237.4	0	3	261	16	292	14	294	0.93	98.4791
	Phvul.002G326800.5	-	306	Pkinase	PF00069.30	263	3.1e-70	237.6	0	1	1	1.7e-71	3.5e-70	237.4	0	3	261	16	292	14	294	0.93	98.4791
	Phvul.011G070800.2	-	373	Pkinase	PF00069.30	263	1.2e-69	235.6	0	1	1	9.3e-71	1.9e-69	235	0	5	263	43	325	41	325	0.89	98.4791
	Phvul.002G159500.1	-	372	Pkinase	PF00069.30	263	3.3e-69	234.2	0	1	1	2.2e-70	4.6e-69	233.8	0	5	263	42	324	39	324	0.92	98.4791
	Phvul.002G178400.1	-	440	Pkinase	PF00069.30	263	3e-68	231.1	0	1	1	2e-69	4.1e-68	230.6	0	5	263	3	260	1	260	0.94	98.4791
	Phvul.010G102800.1	-	373	Pkinase	PF00069.30	263	3.7e-68	230.8	0	1	1	2.9e-69	6e-68	230.1	0	5	263	43	325	40	325	0.88	98.4791
	Phvul.002G292400.1	-	381	Pkinase	PF00069.30	263	8.5e-68	229.6	0	1	1	6.5e-69	1.3e-67	229	0	5	263	51	333	49	333	0.9	98.4791
	Phvul.002G292400.2	-	381	Pkinase	PF00069.30	263	8.5e-68	229.6	0	1	1	6.5e-69	1.3e-67	229	0	5	263	51	333	49	333	0.9	98.4791
	Phvul.004G010400.1	-	519	Pkinase	PF00069.30	263	3.7e-59	201.3	0	1	1	2.3e-60	4.6e-59	201	0	5	263	88	340	84	340	0.93	98.4791
	Phvul.009G148000.1	-	660	Pkinase	PF00069.30	263	6.6e-52	177.5	0.1	1	1	6.9e-53	1.4e-51	176.4	0.1	4	262	36	289	33	290	0.9	98.4791
	Phvul.008G286300.1	-	297	Pkinase	PF00069.30	263	2.6e-51	175.5	0	1	1	1.5e-52	3.1e-51	175.3	0	5	263	30	284	27	284	0.9	98.4791
	Phvul.006G066611.1	-	386	Pkinase	PF00069.30	263	2.6e-50	172.3	0	1	1	1.7e-51	3.4e-50	171.9	0	4	262	65	336	62	336	0.86	98.4791
	Phvul.006G066500.1	-	451	Pkinase	PF00069.30	263	4e-50	171.7	0	1	1	2.7e-51	5.5e-50	171.2	0	4	262	130	401	127	401	0.86	98.4791
	Phvul.L001761.1	-	451	Pkinase	PF00069.30	263	4e-50	171.7	0	1	1	2.7e-51	5.5e-50	171.2	0	4	262	130	401	127	401	0.86	98.4791
	Phvul.007G185900.2	-	708	Pkinase	PF00069.30	263	7.7e-49	167.5	0	1	1	5.6e-50	1.1e-48	166.9	0	4	262	27	280	25	281	0.91	98.4791
	Phvul.007G185900.1	-	734	Pkinase	PF00069.30	263	8.3e-49	167.3	0	1	1	6e-50	1.2e-48	166.8	0	4	262	27	280	25	281	0.91	98.4791
	Phvul.005G090000.1	-	431	Pkinase	PF00069.30	263	3.5e-48	165.3	0	1	1	2.3e-49	4.7e-48	164.9	0	1	259	113	373	113	375	0.89	98.4791
	Phvul.005G090000.2	-	431	Pkinase	PF00069.30	263	3.5e-48	165.3	0	1	1	2.3e-49	4.7e-48	164.9	0	1	259	113	373	113	375	0.89	98.4791
	Phvul.005G090000.3	-	431	Pkinase	PF00069.30	263	3.5e-48	165.3	0	1	1	2.3e-49	4.7e-48	164.9	0	1	259	113	373	113	375	0.89	98.4791
	Phvul.007G220800.1	-	371	Pkinase	PF00069.30	263	1.1e-47	163.6	0	1	1	7.2e-49	1.5e-47	163.3	0	1	259	46	316	46	318	0.84	98.4791
	Phvul.009G138532.1	-	493	Pkinase	PF00069.30	263	4.2e-47	161.8	0	1	1	2.8e-48	5.6e-47	161.3	0	1	259	180	450	180	452	0.84	98.4791
	Phvul.008G047600.1	-	778	Pkinase	PF00069.30	263	5.1e-47	161.5	0	1	1	3.5e-48	7.2e-47	161	0	2	260	490	757	489	760	0.85	98.4791
	Phvul.008G248200.1	-	608	Pkinase	PF00069.30	263	8.5e-47	160.8	0	1	1	6.1e-48	1.2e-46	160.2	0	5	263	20	274	17	274	0.9	98.4791
	Phvul.008G106500.1	-	1032	Pkinase	PF00069.30	263	1.3e-46	160.1	0	1	1	9.2e-48	1.9e-46	159.6	0	2	260	759	1029	758	1032	0.92	98.4791
	Phvul.008G084000.1	-	620	Pkinase	PF00069.30	263	1.7e-46	159.8	0	1	1	1.2e-47	2.4e-46	159.3	0	5	263	42	296	39	296	0.89	98.4791
	Phvul.007G244300.1	-	658	Pkinase	PF00069.30	263	1.9e-43	149.8	0	1	1	1.5e-44	3.1e-43	149.1	0	1	259	30	309	30	312	0.85	98.4791
	Phvul.006G189800.1	-	717	Pkinase	PF00069.30	263	2.1e-36	126.7	0	1	1	1.4e-37	2.8e-36	126.3	0	2	260	440	712	439	714	0.87	98.4791
	Phvul.002G224200.3	-	630	Pkinase	PF00069.30	263	3.2e-33	116.3	0	1	1	2.2e-34	4.5e-33	115.8	0	2	260	353	625	352	627	0.87	98.4791
	Phvul.002G224200.1	-	700	Pkinase	PF00069.30	263	4e-33	115.9	0	1	1	2.8e-34	5.7e-33	115.4	0	2	260	423	695	422	697	0.87	98.4791
	Phvul.002G224200.2	-	700	Pkinase	PF00069.30	263	4e-33	115.9	0	1	1	2.8e-34	5.7e-33	115.4	0	2	260	423	695	422	697	0.87	98.4791
	Phvul.007G258000.2	-	568	Pkinase	PF00069.30	263	5.6e-31	108.9	0	1	1	3.8e-32	7.8e-31	108.4	0	1	259	246	520	246	523	0.82	98.4791
	Phvul.007G258000.1	-	735	Pkinase	PF00069.30	263	9.9e-31	108.1	0	1	1	7e-32	1.4e-30	107.6	0	1	259	413	687	413	690	0.82	98.4791
	Phvul.011G071400.1	-	371	Pkinase	PF00069.30	263	2.2e-72	244.6	0	1	1	1.6e-73	3.3e-72	244	0	6	263	44	325	41	325	0.9	98.0989
	Phvul.003G059500.1	-	394	Pkinase	PF00069.30	263	9.8e-72	242.5	0	1	1	7.1e-73	1.4e-71	241.9	0	6	263	67	347	64	347	0.89	98.0989
	Phvul.006G118300.1	-	722	Pkinase	PF00069.30	263	7.8e-61	206.8	0	1	1	7.4e-62	1.5e-60	205.8	0	2	259	443	692	442	694	0.93	98.0989
	Phvul.006G118300.2	-	722	Pkinase	PF00069.30	263	7.8e-61	206.8	0	1	1	7.4e-62	1.5e-60	205.8	0	2	259	443	692	442	694	0.93	98.0989
	Phvul.005G115900.1	-	399	Pkinase	PF00069.30	263	9.3e-60	203.3	0	1	1	5.5e-61	1.1e-59	203	0	6	263	8	256	3	256	0.9	98.0989
	Phvul.001G035100.1	-	937	Pkinase	PF00069.30	263	1.1e-53	183.4	0	1	1	8.7e-55	1.8e-53	182.7	0	3	260	672	921	670	923	0.92	98.0989
	Phvul.006G200800.1	-	639	Pkinase	PF00069.30	263	1.6e-51	176.3	0	1	1	1e-52	2.1e-51	175.9	0	2	259	327	593	326	597	0.82	98.0989
	Phvul.007G221800.1	-	1111	Pkinase	PF00069.30	263	9.3e-51	173.7	0	1	1	6.1e-52	1.3e-50	173.3	0	2	259	814	1084	813	1087	0.85	98.0989
	Phvul.007G260500.1	-	657	Pkinase	PF00069.30	263	1.4e-50	173.2	0	1	1	9.7e-52	2e-50	172.7	0	1	258	336	606	336	608	0.87	98.0989
	Phvul.001G045400.1	-	667	Pkinase	PF00069.30	263	6.8e-50	170.9	0	1	1	4.6e-51	9.4e-50	170.4	0	2	259	352	616	351	618	0.84	98.0989
	Phvul.007G030800.1	-	606	Pkinase	PF00069.30	263	7.5e-50	170.8	0	1	1	5.1e-51	1e-49	170.3	0	2	259	310	576	309	578	0.87	98.0989
	Phvul.002G215400.1	-	668	Pkinase	PF00069.30	263	1.3e-49	170	0	1	1	9.8e-51	2e-49	169.4	0	2	259	362	628	361	631	0.83	98.0989
	Phvul.011G067401.1	-	562	Pkinase	PF00069.30	263	2.1e-49	169.3	0.1	1	1	1.5e-50	3e-49	168.8	0.1	2	259	216	484	215	486	0.86	98.0989
	Phvul.007G234400.1	-	643	Pkinase	PF00069.30	263	2.4e-49	169.1	0	1	1	1.6e-50	3.2e-49	168.7	0	2	259	328	588	327	590	0.88	98.0989
	Phvul.001G047100.1	-	451	Pkinase	PF00069.30	263	3e-49	168.8	0	1	1	1.9e-50	3.8e-49	168.5	0	1	258	149	416	149	420	0.8	98.0989
	Phvul.003G170200.1	-	499	Pkinase	PF00069.30	263	4.5e-49	168.2	0	1	1	2.9e-50	6e-49	167.8	0	5	262	217	486	213	487	0.84	98.0989
	Phvul.002G324600.1	-	918	Pkinase	PF00069.30	263	5e-49	168.1	0	1	1	3.5e-50	7e-49	167.6	0	2	259	573	847	572	849	0.87	98.0989
	Phvul.006G150900.1	-	390	Pkinase	PF00069.30	263	5e-49	168.1	0	1	2	9.2e-50	1.9e-48	166.2	0	1	258	78	349	78	354	0.82	98.0989
	Phvul.006G084400.1	-	682	Pkinase	PF00069.30	263	7.6e-49	167.5	0	1	1	5.3e-50	1.1e-48	167	0	2	259	363	631	362	633	0.85	98.0989
	Phvul.006G200500.1	-	651	Pkinase	PF00069.30	263	9.1e-49	167.2	0	1	1	5.7e-50	1.2e-48	166.9	0	2	259	344	609	343	613	0.83	98.0989
	Phvul.007G204300.1	-	506	Pkinase	PF00069.30	263	1.1e-48	167	0	1	1	7.6e-50	1.5e-48	166.5	0	2	259	189	457	188	459	0.81	98.0989
	Phvul.007G204300.2	-	519	Pkinase	PF00069.30	263	1.2e-48	166.9	0	1	1	8.1e-50	1.6e-48	166.4	0	2	259	189	457	188	459	0.81	98.0989
	Phvul.002G073500.1	-	361	Pkinase	PF00069.30	263	1.3e-48	166.7	0	1	1	8.7e-50	1.8e-48	166.3	0	2	259	64	338	63	341	0.85	98.0989
	Phvul.007G050400.1	-	655	Pkinase	PF00069.30	263	1.4e-48	166.6	0	1	1	1e-49	2.1e-48	166	0	2	259	337	604	336	606	0.87	98.0989
	Phvul.006G057900.1	-	646	Pkinase	PF00069.30	263	1.7e-48	166.3	0	1	1	1.2e-49	2.4e-48	165.8	0	2	259	325	594	324	596	0.83	98.0989
	Phvul.008G205600.2	-	389	Pkinase	PF00069.30	263	2.4e-48	165.9	0	1	1	1.9e-49	3.9e-48	165.1	0	2	259	71	349	70	352	0.84	98.0989
	Phvul.008G205600.3	-	389	Pkinase	PF00069.30	263	2.4e-48	165.9	0	1	1	1.9e-49	3.9e-48	165.1	0	2	259	71	349	70	352	0.84	98.0989
	Phvul.008G094500.1	-	673	Pkinase	PF00069.30	263	2.4e-48	165.8	0	1	1	1.7e-49	3.5e-48	165.3	0	1	258	349	613	349	617	0.84	98.0989
	Phvul.007G031000.1	-	658	Pkinase	PF00069.30	263	3.4e-48	165.3	0	1	1	2.4e-49	4.9e-48	164.8	0	1	258	325	594	325	597	0.86	98.0989
	Phvul.003G121000.1	-	504	Pkinase	PF00069.30	263	3.7e-48	165.2	0	1	1	2.5e-49	5.1e-48	164.8	0	2	259	183	451	182	453	0.84	98.0989
	Phvul.003G121000.2	-	504	Pkinase	PF00069.30	263	3.7e-48	165.2	0	1	1	2.5e-49	5.1e-48	164.8	0	2	259	183	451	182	453	0.84	98.0989
	Phvul.002G000200.1	-	806	Pkinase	PF00069.30	263	3.7e-48	165.2	0	1	1	2.5e-49	5e-48	164.8	0	2	259	516	784	515	787	0.83	98.0989
	Phvul.009G219300.1	-	501	Pkinase	PF00069.30	263	6.4e-48	164.4	0	1	1	4.8e-49	9.8e-48	163.8	0	2	259	183	451	182	453	0.83	98.0989
	Phvul.011G182300.1	-	1057	Pkinase	PF00069.30	263	7.6e-48	164.2	0	1	1	6.6e-49	1.3e-47	163.4	0	2	259	785	1053	784	1055	0.93	98.0989
	Phvul.008G279300.1	-	662	Pkinase	PF00069.30	263	8.2e-48	164.1	0	1	1	5.7e-49	1.2e-47	163.6	0	2	259	345	612	344	614	0.85	98.0989
	Phvul.006G080500.1	-	951	Pkinase	PF00069.30	263	1.2e-47	163.5	0	1	1	8.4e-49	1.7e-47	163	0	2	259	619	885	618	887	0.92	98.0989
	Phvul.003G148100.1	-	1108	Pkinase	PF00069.30	263	1.5e-47	163.2	0	1	1	1.1e-48	2.2e-47	162.7	0	2	259	836	1096	835	1098	0.88	98.0989
	Phvul.008G192900.1	-	505	Pkinase	PF00069.30	263	1.7e-47	163.1	0	1	1	1.2e-48	2.5e-47	162.5	0	2	259	189	457	188	459	0.86	98.0989
	Phvul.008G192900.2	-	505	Pkinase	PF00069.30	263	1.7e-47	163.1	0	1	1	1.2e-48	2.5e-47	162.5	0	2	259	189	457	188	459	0.86	98.0989
	Phvul.003G090000.1	-	956	Pkinase	PF00069.30	263	1.7e-47	163	0	1	1	1.3e-48	2.6e-47	162.4	0	2	259	633	900	632	902	0.85	98.0989
	Phvul.001G178400.1	-	425	Pkinase	PF00069.30	263	3.3e-47	162.1	0	1	1	2.2e-48	4.4e-47	161.7	0	2	259	85	363	84	365	0.8	98.0989
	Phvul.001G178400.2	-	425	Pkinase	PF00069.30	263	3.3e-47	162.1	0	1	1	2.2e-48	4.4e-47	161.7	0	2	259	85	363	84	365	0.8	98.0989
	Phvul.002G214900.1	-	695	Pkinase	PF00069.30	263	4.2e-47	161.8	0	1	1	2.7e-48	5.5e-47	161.4	0	2	259	362	627	361	631	0.83	98.0989
	Phvul.001G222700.1	-	510	Pkinase	PF00069.30	263	4.5e-47	161.7	0	1	1	3e-48	6.1e-47	161.2	0	2	259	192	460	191	462	0.81	98.0989
	Phvul.001G184100.1	-	634	Pkinase	PF00069.30	263	4.9e-47	161.5	0	1	1	3.5e-48	7.2e-47	161	0	2	259	350	622	349	625	0.83	98.0989
	Phvul.001G047100.2	-	447	Pkinase	PF00069.30	263	5.3e-47	161.4	0	1	1	3.4e-48	6.8e-47	161.1	0	1	258	149	412	149	416	0.79	98.0989
	Phvul.008G079800.1	-	956	Pkinase	PF00069.30	263	6.7e-47	161.1	0	1	1	4.8e-48	9.8e-47	160.6	0	2	259	619	888	618	890	0.88	98.0989
	Phvul.005G055000.1	-	383	Pkinase	PF00069.30	263	7.1e-47	161	0	1	1	4.6e-48	9.4e-47	160.6	0	2	259	44	311	43	314	0.8	98.0989
	Phvul.001G167700.1	-	786	Pkinase	PF00069.30	263	2e-46	159.6	0	1	1	1.3e-47	2.7e-46	159.1	0	2	259	384	653	383	657	0.82	98.0989
	Phvul.009G232100.3	-	919	Pkinase	PF00069.30	263	2.5e-46	159.2	0	1	1	1.7e-47	3.4e-46	158.8	0	1	258	536	806	536	809	0.82	98.0989
	Phvul.009G232100.8	-	920	Pkinase	PF00069.30	263	2.5e-46	159.2	0	1	1	1.7e-47	3.4e-46	158.8	0	1	258	537	807	537	810	0.82	98.0989
	Phvul.008G117800.1	-	668	Pkinase	PF00069.30	263	3.5e-46	158.7	0	1	1	2.3e-47	4.8e-46	158.3	0	2	259	342	609	341	611	0.84	98.0989
	Phvul.009G232100.2	-	1112	Pkinase	PF00069.30	263	3.5e-46	158.7	0	1	1	2.4e-47	4.8e-46	158.3	0	1	258	729	999	729	1002	0.82	98.0989
	Phvul.009G232100.7	-	1112	Pkinase	PF00069.30	263	3.5e-46	158.7	0	1	1	2.4e-47	4.8e-46	158.3	0	1	258	729	999	729	1002	0.82	98.0989
	Phvul.009G232100.6	-	1113	Pkinase	PF00069.30	263	3.5e-46	158.7	0	1	1	2.4e-47	4.9e-46	158.3	0	1	258	730	1000	730	1003	0.82	98.0989
	Phvul.010G067900.1	-	602	Pkinase	PF00069.30	263	3.9e-46	158.6	0	1	1	2.9e-47	6e-46	158	0	5	262	28	281	25	282	0.9	98.0989
	Phvul.002G206900.3	-	546	Pkinase	PF00069.30	263	4.4e-46	158.4	0	1	1	2.8e-47	5.7e-46	158.1	0	2	259	225	496	224	498	0.83	98.0989
	Phvul.009G232100.5	-	1274	Pkinase	PF00069.30	263	4.4e-46	158.4	0	1	1	3e-47	6.1e-46	158	0	1	258	891	1161	891	1164	0.82	98.0989
	Phvul.009G232100.4	-	1281	Pkinase	PF00069.30	263	4.5e-46	158.4	0	1	1	3e-47	6.1e-46	157.9	0	1	258	898	1168	898	1171	0.82	98.0989
	Phvul.009G232100.1	-	1282	Pkinase	PF00069.30	263	4.5e-46	158.4	0	1	1	3e-47	6.2e-46	157.9	0	1	258	899	1169	899	1172	0.82	98.0989
	Phvul.003G174700.1	-	1390	Pkinase	PF00069.30	263	4.6e-46	158.4	0	1	1	3.4e-47	6.9e-46	157.8	0	2	259	1101	1361	1100	1363	0.86	98.0989
	Phvul.002G206900.1	-	618	Pkinase	PF00069.30	263	5.8e-46	158	0	1	1	3.8e-47	7.7e-46	157.6	0	2	259	297	568	296	570	0.83	98.0989
	Phvul.002G206900.2	-	618	Pkinase	PF00069.30	263	5.8e-46	158	0	1	1	3.8e-47	7.7e-46	157.6	0	2	259	297	568	296	570	0.83	98.0989
	Phvul.006G133400.1	-	953	Pkinase	PF00069.30	263	6e-46	158	0	1	1	4.2e-47	8.6e-46	157.5	0	2	259	637	903	636	906	0.87	98.0989
	Phvul.006G133400.2	-	992	Pkinase	PF00069.30	263	6.5e-46	157.9	0	1	1	4.6e-47	9.3e-46	157.4	0	2	259	676	942	675	945	0.87	98.0989
	Phvul.002G023400.1	-	681	Pkinase	PF00069.30	263	9.1e-46	157.4	0	1	1	6.3e-47	1.3e-45	156.9	0	2	259	315	584	314	587	0.85	98.0989
	Phvul.003G273700.1	-	965	Pkinase	PF00069.30	263	9.7e-46	157.3	0	1	1	8e-47	1.6e-45	156.6	0	2	259	630	897	629	899	0.86	98.0989
	Phvul.005G014900.1	-	661	Pkinase	PF00069.30	263	1.7e-45	156.5	0	1	1	1.4e-46	2.9e-45	155.7	0	2	259	344	612	343	615	0.79	98.0989
	Phvul.006G194300.1	-	710	Pkinase	PF00069.30	263	2e-45	156.2	0	1	1	1.5e-46	3.1e-45	155.6	0	2	259	394	661	393	663	0.85	98.0989
	Phvul.003G239500.1	-	861	Pkinase	PF00069.30	263	2e-45	156.2	0	1	1	1.5e-46	3e-45	155.7	0	1	258	518	785	518	788	0.85	98.0989
	Phvul.003G038800.1	-	840	Pkinase	PF00069.30	263	3.7e-45	155.4	0	1	1	2.5e-46	5e-45	155	0	3	260	525	792	523	795	0.86	98.0989
	Phvul.008G105300.1	-	379	Pkinase	PF00069.30	263	4e-45	155.3	0	1	1	2.7e-46	5.5e-45	154.8	0	2	259	45	312	44	314	0.81	98.0989
	Phvul.008G105300.2	-	379	Pkinase	PF00069.30	263	4e-45	155.3	0	1	1	2.7e-46	5.5e-45	154.8	0	2	259	45	312	44	314	0.81	98.0989
	Phvul.003G015800.1	-	929	Pkinase	PF00069.30	263	4.6e-45	155.1	0	1	1	3.1e-46	6.4e-45	154.6	0	2	259	576	849	575	851	0.85	98.0989
	Phvul.001G214000.4	-	656	Pkinase	PF00069.30	263	1.1e-44	153.8	0	1	1	9.1e-46	1.8e-44	153.1	0	2	259	313	585	312	588	0.83	98.0989
	Phvul.002G207000.1	-	618	Pkinase	PF00069.30	263	1.2e-44	153.7	0	1	1	7.7e-46	1.6e-44	153.3	0	2	259	294	565	293	567	0.85	98.0989
	Phvul.001G214000.3	-	674	Pkinase	PF00069.30	263	1.2e-44	153.7	0	1	1	9.6e-46	2e-44	153	0	2	259	331	603	330	606	0.83	98.0989
	Phvul.001G214000.1	-	680	Pkinase	PF00069.30	263	1.3e-44	153.6	0	1	1	9.8e-46	2e-44	153	0	2	259	337	609	336	612	0.83	98.0989
	Phvul.001G214000.2	-	718	Pkinase	PF00069.30	263	1.4e-44	153.5	0	1	1	1.1e-45	2.3e-44	152.8	0	2	259	375	647	374	650	0.83	98.0989
	Phvul.007G213400.1	-	695	Pkinase	PF00069.30	263	1.5e-44	153.3	0	1	1	1.1e-45	2.3e-44	152.8	0	2	259	352	624	351	627	0.83	98.0989
	Phvul.008G223900.1	-	796	Pkinase	PF00069.30	263	2.4e-44	152.7	0	1	1	1.6e-45	3.2e-44	152.3	0	2	259	488	770	487	772	0.81	98.0989
	Phvul.006G208100.1	-	616	Pkinase	PF00069.30	263	3.1e-44	152.4	0	1	1	2e-45	4e-44	152	0	2	259	293	564	292	566	0.83	98.0989
	Phvul.003G188000.1	-	822	Pkinase	PF00069.30	263	1.2e-43	150.5	0	1	1	8.5e-45	1.7e-43	149.9	0	3	260	514	779	512	781	0.85	98.0989
	Phvul.007G064500.1	-	359	Pkinase	PF00069.30	263	1.3e-43	150.3	0	1	1	8.6e-45	1.8e-43	149.9	0	1	258	46	314	46	316	0.86	98.0989
	Phvul.009G184500.2	-	1112	Pkinase	PF00069.30	263	2e-43	149.7	0	1	1	1.9e-44	3.8e-43	148.8	0	2	259	824	1094	823	1096	0.83	98.0989
	Phvul.003G191400.1	-	409	Pkinase	PF00069.30	263	2.1e-43	149.6	0	1	1	1.8e-44	3.6e-43	148.9	0	2	259	84	361	83	364	0.84	98.0989
	Phvul.002G064400.1	-	623	Pkinase	PF00069.30	263	2.6e-43	149.3	0	1	1	1.7e-44	3.5e-43	148.9	0	2	259	303	573	302	575	0.87	98.0989
	Phvul.003G239400.2	-	862	Pkinase	PF00069.30	263	3.4e-43	148.9	0	1	1	2.5e-44	5e-43	148.4	0	1	258	519	786	519	789	0.84	98.0989
	Phvul.010G129000.1	-	464	Pkinase	PF00069.30	263	3.6e-43	148.9	0	1	1	2.6e-44	5.4e-43	148.3	0	2	259	83	357	82	359	0.82	98.0989
	Phvul.001G236600.1	-	634	Pkinase	PF00069.30	263	5.7e-43	148.2	0	1	1	4.1e-44	8.3e-43	147.7	0	2	259	347	619	346	622	0.87	98.0989
	Phvul.004G124100.1	-	324	Pkinase	PF00069.30	263	8.4e-43	147.7	0	1	1	5.4e-44	1.1e-42	147.3	0	1	258	46	314	46	316	0.87	98.0989
	Phvul.004G124100.2	-	324	Pkinase	PF00069.30	263	8.4e-43	147.7	0	1	1	5.4e-44	1.1e-42	147.3	0	1	258	46	314	46	316	0.87	98.0989
	Phvul.008G022700.1	-	623	Pkinase	PF00069.30	263	1.6e-42	146.8	0	1	1	1.3e-43	2.6e-42	146	0	2	259	304	570	303	572	0.87	98.0989
	Phvul.008G022700.2	-	623	Pkinase	PF00069.30	263	1.6e-42	146.8	0	1	1	1.3e-43	2.6e-42	146	0	2	259	304	570	303	572	0.87	98.0989
	Phvul.006G174400.2	-	572	Pkinase	PF00069.30	263	2.5e-42	146.1	0	1	1	1.6e-43	3.2e-42	145.7	0	2	259	250	519	249	521	0.87	98.0989
	Phvul.006G174400.1	-	620	Pkinase	PF00069.30	263	3e-42	145.8	0	1	1	1.9e-43	3.9e-42	145.5	0	2	259	298	567	297	569	0.87	98.0989
	Phvul.005G103200.1	-	691	Pkinase	PF00069.30	263	3.5e-42	145.6	0	1	1	2.5e-43	5e-42	145.1	0	2	259	350	615	349	617	0.84	98.0989
	Phvul.006G185000.1	-	692	Pkinase	PF00069.30	263	8.2e-42	144.4	0	1	1	5.5e-43	1.1e-41	144	0	2	259	354	619	353	621	0.85	98.0989
	Phvul.003G044400.3	-	584	Pkinase	PF00069.30	263	8.8e-42	144.3	0	1	1	5.9e-43	1.2e-41	143.9	0	2	259	265	531	264	533	0.87	98.0989
	Phvul.003G044400.1	-	621	Pkinase	PF00069.30	263	1e-41	144.1	0	1	1	6.8e-43	1.4e-41	143.7	0	2	259	302	568	301	570	0.87	98.0989
	Phvul.003G044400.2	-	621	Pkinase	PF00069.30	263	1e-41	144.1	0	1	1	6.8e-43	1.4e-41	143.7	0	2	259	302	568	301	570	0.87	98.0989
	Phvul.003G149200.1	-	379	Pkinase	PF00069.30	263	1.1e-41	144	0	1	1	7.1e-43	1.4e-41	143.6	0	2	259	43	311	42	312	0.86	98.0989
	Phvul.007G168000.1	-	410	Pkinase	PF00069.30	263	2.4e-41	142.9	0	1	1	1.5e-42	3.1e-41	142.5	0	2	259	116	378	115	380	0.82	98.0989
	Phvul.002G257000.1	-	610	Pkinase	PF00069.30	263	7.7e-41	141.2	0	1	1	5.2e-42	1.1e-40	140.8	0	2	259	288	559	287	561	0.82	98.0989
	Phvul.002G257000.2	-	610	Pkinase	PF00069.30	263	7.7e-41	141.2	0	1	1	5.2e-42	1.1e-40	140.8	0	2	259	288	559	287	561	0.82	98.0989
	Phvul.010G122100.2	-	683	Pkinase	PF00069.30	263	3e-40	139.3	0	1	1	2.2e-41	4.5e-40	138.7	0	2	259	378	647	377	651	0.86	98.0989
	Phvul.010G122100.1	-	718	Pkinase	PF00069.30	263	3.4e-40	139.1	0	1	1	2.5e-41	5e-40	138.6	0	2	259	413	682	412	686	0.86	98.0989
	Phvul.009G260900.3	-	698	Pkinase	PF00069.30	263	6.8e-39	134.9	0	1	1	4.7e-40	9.5e-39	134.4	0	2	259	393	662	392	665	0.85	98.0989
	Phvul.009G260900.1	-	720	Pkinase	PF00069.30	263	7.3e-39	134.7	0	1	1	5e-40	1e-38	134.3	0	2	259	415	684	414	687	0.85	98.0989
	Phvul.011G202200.1	-	794	Pkinase	PF00069.30	263	2.3e-38	133.1	0	1	1	1.8e-39	3.7e-38	132.4	0	2	259	476	745	475	747	0.78	98.0989
	Phvul.008G050700.2	-	509	Pkinase	PF00069.30	263	2.9e-36	126.2	0	1	1	1.9e-37	4e-36	125.8	0	2	259	198	469	197	471	0.85	98.0989
	Phvul.008G050700.1	-	614	Pkinase	PF00069.30	263	4.6e-36	125.6	0	1	1	3.1e-37	6.3e-36	125.1	0	2	259	303	574	302	576	0.85	98.0989
	Phvul.004G154600.1	-	627	Pkinase	PF00069.30	263	1e-80	272	0.5	1	2	3.6e-33	7.4e-32	111.8	0.2	3	259	42	311	40	312	0.82	97.7186
	Phvul.008G139200.1	-	841	Pkinase	PF00069.30	263	8.8e-71	239.4	0	1	2	4.7e-44	9.6e-43	147.5	0	2	258	118	411	117	414	0.84	97.7186
	Phvul.003G114400.1	-	783	Pkinase	PF00069.30	263	2.3e-59	202	0	1	1	1.7e-60	3.4e-59	201.4	0	3	259	507	755	505	757	0.93	97.7186
	Phvul.002G169100.1	-	427	Pkinase	PF00069.30	263	1.7e-57	195.8	0	1	1	1.4e-58	2.8e-57	195.1	0	3	259	153	407	151	409	0.89	97.7186
	Phvul.009G035800.1	-	921	Pkinase	PF00069.30	263	1.4e-56	192.9	0	1	1	1.1e-57	2.2e-56	192.2	0	3	259	653	903	651	906	0.92	97.7186
	Phvul.008G182800.1	-	944	Pkinase	PF00069.30	263	2.4e-56	192.1	0	1	1	2.4e-57	4.8e-56	191.1	0	3	259	676	926	674	928	0.92	97.7186
	Phvul.004G151400.2	-	745	Pkinase	PF00069.30	263	8.9e-56	190.2	0	1	1	6.1e-57	1.2e-55	189.7	0	3	259	460	708	458	710	0.92	97.7186
	Phvul.004G151400.1	-	1030	Pkinase	PF00069.30	263	1.6e-55	189.4	0	1	1	1.1e-56	2.3e-55	188.9	0	3	259	745	993	743	995	0.92	97.7186
	Phvul.011G133650.6	-	731	Pkinase	PF00069.30	263	8.9e-55	186.9	0	1	1	6.9e-56	1.4e-54	186.3	0	3	259	477	721	475	724	0.91	97.7186
	Phvul.011G133650.5	-	763	Pkinase	PF00069.30	263	9.8e-55	186.8	0	1	1	7.6e-56	1.5e-54	186.1	0	3	259	509	753	507	756	0.91	97.7186
	Phvul.011G133650.3	-	786	Pkinase	PF00069.30	263	1e-54	186.7	0	1	1	8e-56	1.6e-54	186.1	0	3	259	532	776	530	779	0.91	97.7186
	Phvul.011G133650.4	-	786	Pkinase	PF00069.30	263	1e-54	186.7	0	1	1	8e-56	1.6e-54	186.1	0	3	259	532	776	530	779	0.91	97.7186
	Phvul.011G133650.1	-	818	Pkinase	PF00069.30	263	1.1e-54	186.6	0	1	1	8.6e-56	1.8e-54	185.9	0	3	259	564	808	562	811	0.91	97.7186
	Phvul.011G133650.2	-	818	Pkinase	PF00069.30	263	1.1e-54	186.6	0	1	1	8.6e-56	1.8e-54	185.9	0	3	259	564	808	562	811	0.91	97.7186
	Phvul.002G328800.2	-	932	Pkinase	PF00069.30	263	4e-54	184.8	0	1	1	3e-55	6.1e-54	184.2	0	3	259	654	902	652	904	0.92	97.7186
	Phvul.002G328800.1	-	999	Pkinase	PF00069.30	263	4.5e-54	184.6	0	1	1	3.4e-55	6.9e-54	184	0	3	259	721	969	719	971	0.92	97.7186
	Phvul.001G040100.1	-	636	Pkinase	PF00069.30	263	1.4e-51	176.5	0	1	1	9.8e-53	2e-51	175.9	0	3	259	341	605	339	607	0.85	97.7186
	Phvul.003G287101.1	-	449	Pkinase	PF00069.30	263	1.7e-51	176.2	0	1	1	1.1e-52	2.2e-51	175.8	0	2	258	122	387	121	391	0.87	97.7186
	Phvul.005G050200.1	-	1226	Pkinase	PF00069.30	263	4.1e-51	174.9	0	1	1	3.2e-52	6.5e-51	174.3	0	2	258	948	1207	947	1210	0.88	97.7186
	Phvul.003G063700.1	-	615	Pkinase	PF00069.30	263	8.8e-51	173.8	0	1	1	6.9e-52	1.4e-50	173.2	0	2	258	312	584	311	587	0.85	97.7186
	Phvul.006G084800.1	-	640	Pkinase	PF00069.30	263	1.8e-50	172.8	0	1	1	1.2e-51	2.5e-50	172.3	0	2	258	321	589	320	591	0.86	97.7186
	Phvul.008G122700.1	-	1260	Pkinase	PF00069.30	263	2.4e-50	172.4	0	1	1	2e-51	4e-50	171.6	0	2	258	977	1236	976	1239	0.87	97.7186
	Phvul.006G084700.1	-	681	Pkinase	PF00069.30	263	2.6e-50	172.3	0	1	1	1.9e-51	3.9e-50	171.7	0	2	258	367	634	366	637	0.85	97.7186
	Phvul.002G059500.1	-	619	Pkinase	PF00069.30	263	4.1e-50	171.6	0	1	1	2.8e-51	5.7e-50	171.2	0	2	258	317	588	316	591	0.86	97.7186
	Phvul.001G040800.1	-	620	Pkinase	PF00069.30	263	4.7e-50	171.4	0	1	1	3.2e-51	6.5e-50	171	0	3	259	343	607	341	609	0.84	97.7186
	Phvul.011G176800.1	-	1242	Pkinase	PF00069.30	263	5.2e-50	171.3	0	1	1	4.3e-51	8.7e-50	170.6	0	2	258	961	1220	960	1223	0.88	97.7186
	Phvul.004G175900.1	-	1005	Pkinase	PF00069.30	263	5.8e-50	171.1	0	1	1	4.1e-51	8.3e-50	170.6	0	3	259	685	962	683	965	0.87	97.7186
	Phvul.003G206300.2	-	327	Pkinase	PF00069.30	263	1.2e-49	170.1	0	1	1	2e-49	4.1e-48	165.1	0	7	263	1	320	1	320	0.85	97.7186
	Phvul.009G112200.1	-	1018	Pkinase	PF00069.30	263	1.5e-49	169.8	0	1	1	1.2e-50	2.4e-49	169.1	0	3	259	701	972	699	974	0.84	97.7186
	Phvul.001G000900.1	-	351	Pkinase	PF00069.30	263	1.9e-49	169.4	0	1	1	1.2e-50	2.5e-49	169	0	2	258	47	314	46	318	0.87	97.7186
	Phvul.008G058800.1	-	644	Pkinase	PF00069.30	263	1.9e-49	169.4	0	1	1	1.4e-50	2.9e-49	168.8	0	1	257	353	618	353	622	0.86	97.7186
	Phvul.008G056800.1	-	672	Pkinase	PF00069.30	263	2.6e-49	169	0	1	1	2e-50	4.1e-49	168.4	0	1	257	358	624	358	627	0.84	97.7186
	Phvul.003G206200.2	-	327	Pkinase	PF00069.30	263	2.9e-49	168.8	0	1	1	4.9e-49	9.9e-48	163.8	0	7	263	1	320	1	320	0.85	97.7186
	Phvul.001G040600.1	-	607	Pkinase	PF00069.30	263	3.3e-49	168.7	0	1	1	2.3e-50	4.7e-49	168.2	0	3	259	337	591	335	593	0.89	97.7186
	Phvul.005G050300.1	-	1220	Pkinase	PF00069.30	263	3.8e-49	168.5	0	1	1	3.1e-50	6.3e-49	167.7	0	2	258	939	1198	938	1201	0.88	97.7186
	Phvul.005G050300.3	-	1220	Pkinase	PF00069.30	263	3.8e-49	168.5	0	1	1	3.1e-50	6.3e-49	167.7	0	2	258	939	1198	938	1201	0.88	97.7186
	Phvul.005G050300.2	-	1261	Pkinase	PF00069.30	263	4e-49	168.4	0	1	1	3.3e-50	6.6e-49	167.7	0	2	258	980	1239	979	1242	0.88	97.7186
	Phvul.004G175800.1	-	1016	Pkinase	PF00069.30	263	4.3e-49	168.3	0.1	1	1	3.3e-50	6.7e-49	167.6	0.1	3	259	698	976	696	979	0.86	97.7186
	Phvul.001G090800.2	-	419	Pkinase	PF00069.30	263	5.7e-49	167.9	0	1	1	3.8e-50	7.7e-49	167.4	0	3	259	77	345	75	349	0.88	97.7186
	Phvul.001G090800.4	-	419	Pkinase	PF00069.30	263	5.7e-49	167.9	0	1	1	3.8e-50	7.7e-49	167.4	0	3	259	77	345	75	349	0.88	97.7186
	Phvul.005G110300.3	-	473	Pkinase	PF00069.30	263	1.1e-48	167	0	1	1	9.6e-50	2e-48	166.1	0	3	259	184	454	182	455	0.81	97.7186
	Phvul.008G056900.1	-	650	Pkinase	PF00069.30	263	1.3e-48	166.7	0	1	1	1.1e-49	2.2e-48	166	0	1	257	337	603	337	606	0.86	97.7186
	Phvul.005G110300.2	-	553	Pkinase	PF00069.30	263	1.6e-48	166.4	0	1	1	1.4e-49	2.9e-48	165.5	0	3	259	264	534	262	535	0.81	97.7186
	Phvul.004G136500.1	-	1003	Pkinase	PF00069.30	263	1.7e-48	166.3	0	1	1	1.3e-49	2.7e-48	165.7	0	3	259	692	964	690	966	0.85	97.7186
	Phvul.002G119900.1	-	693	Pkinase	PF00069.30	263	1.9e-48	166.1	0	1	1	1.3e-49	2.7e-48	165.7	0	2	258	362	631	361	634	0.83	97.7186
	Phvul.004G154800.1	-	704	Pkinase	PF00069.30	263	3e-48	165.5	0	1	1	2.3e-49	4.6e-48	164.9	0	3	259	382	650	380	652	0.84	97.7186
	Phvul.001G040000.1	-	666	Pkinase	PF00069.30	263	3.1e-48	165.5	0	1	1	2.2e-49	4.4e-48	165	0	3	259	354	617	352	619	0.82	97.7186
	Phvul.005G110300.1	-	741	Pkinase	PF00069.30	263	3.3e-48	165.4	0	1	1	2.8e-49	5.8e-48	164.6	0	3	259	452	722	450	723	0.81	97.7186
	Phvul.007G149900.1	-	425	Pkinase	PF00069.30	263	5e-48	164.8	0	1	1	3.2e-49	6.6e-48	164.4	0	4	260	88	365	85	367	0.82	97.7186
	Phvul.007G138200.1	-	757	Pkinase	PF00069.30	263	7.1e-48	164.3	0	1	1	5.1e-49	1e-47	163.8	0	1	257	419	689	419	693	0.85	97.7186
	Phvul.011G045600.1	-	461	Pkinase	PF00069.30	263	7.8e-48	164.1	0	1	1	4.9e-49	1e-47	163.8	0	3	259	145	412	143	415	0.83	97.7186
	Phvul.005G078900.2	-	726	Pkinase	PF00069.30	263	9.9e-48	163.8	0	1	1	6.8e-49	1.4e-47	163.3	0	2	258	394	661	393	664	0.8	97.7186
	Phvul.002G055600.1	-	803	Pkinase	PF00069.30	263	1.1e-47	163.7	0	1	1	7.4e-49	1.5e-47	163.2	0	3	259	515	782	513	785	0.82	97.7186
	Phvul.002G002600.1	-	375	Pkinase	PF00069.30	263	1.6e-47	163.1	0	1	1	1.1e-48	2.2e-47	162.7	0	3	259	71	346	69	348	0.81	97.7186
	Phvul.001G040300.1	-	664	Pkinase	PF00069.30	263	1.8e-47	163	0	1	1	1.3e-48	2.6e-47	162.5	0	3	259	354	617	352	619	0.84	97.7186
	Phvul.009G239800.1	-	463	Pkinase	PF00069.30	263	2e-47	162.8	0	1	1	1.4e-48	2.8e-47	162.3	0	3	259	133	399	131	401	0.86	97.7186
	Phvul.001G040500.1	-	661	Pkinase	PF00069.30	263	2.3e-47	162.6	0	1	1	1.6e-48	3.3e-47	162.1	0	3	259	351	614	349	616	0.85	97.7186
	Phvul.001G048800.2	-	560	Pkinase	PF00069.30	263	2.6e-47	162.4	0	1	1	1.8e-48	3.7e-47	162	0	3	259	261	527	259	529	0.86	97.7186
	Phvul.003G030000.2	-	652	Pkinase	PF00069.30	263	2.7e-47	162.4	0	1	1	1.8e-48	3.6e-47	162	0	3	259	334	602	332	604	0.86	97.7186
	Phvul.004G124900.1	-	847	Pkinase	PF00069.30	263	3.1e-47	162.2	0.1	1	1	2.4e-48	4.9e-47	161.5	0.1	2	258	524	793	523	796	0.82	97.7186
	Phvul.004G125200.1	-	901	Pkinase	PF00069.30	263	3.3e-47	162.1	0	1	1	2.8e-48	5.7e-47	161.3	0	2	258	575	843	574	845	0.82	97.7186
	Phvul.009G114400.1	-	959	Pkinase	PF00069.30	263	3.3e-47	162.1	0	1	1	2.6e-48	5.4e-47	161.4	0	3	259	651	927	588	929	0.87	97.7186
	Phvul.007G051200.1	-	663	Pkinase	PF00069.30	263	4.4e-47	161.7	0.1	1	1	3.3e-48	6.6e-47	161.1	0.1	2	258	339	606	338	609	0.82	97.7186
	Phvul.002G182500.1	-	659	Pkinase	PF00069.30	263	4.6e-47	161.6	0	1	1	3.2e-48	6.6e-47	161.1	0	3	259	341	608	339	610	0.85	97.7186
	Phvul.005G064700.4	-	317	Pkinase	PF00069.30	263	4.9e-47	161.5	0	1	1	3e-48	6.2e-47	161.2	0	3	259	37	303	35	305	0.86	97.7186
	Phvul.008G244400.1	-	942	Pkinase	PF00069.30	263	6.1e-47	161.2	0	1	1	4.6e-48	9.3e-47	160.6	0	2	258	614	879	613	882	0.91	97.7186
	Phvul.005G064700.1	-	354	Pkinase	PF00069.30	263	6.9e-47	161.1	0	1	1	4.4e-48	9e-47	160.7	0	3	259	74	340	72	342	0.86	97.7186
	Phvul.005G064700.2	-	354	Pkinase	PF00069.30	263	6.9e-47	161.1	0	1	1	4.4e-48	9e-47	160.7	0	3	259	74	340	72	342	0.86	97.7186
	Phvul.005G064700.3	-	354	Pkinase	PF00069.30	263	6.9e-47	161.1	0	1	1	4.4e-48	9e-47	160.7	0	3	259	74	340	72	342	0.86	97.7186
	Phvul.004G175700.1	-	1011	Pkinase	PF00069.30	263	6.9e-47	161	0	1	1	4.7e-48	9.6e-47	160.6	0	3	259	698	970	696	973	0.88	97.7186
	Phvul.004G155600.1	-	644	Pkinase	PF00069.30	263	9.3e-47	160.6	0	1	1	6.6e-48	1.3e-46	160.1	0	3	259	345	614	343	616	0.85	97.7186
	Phvul.008G146600.1	-	949	Pkinase	PF00069.30	263	1e-46	160.5	0	1	1	7.2e-48	1.5e-46	160	0	3	259	666	930	664	933	0.88	97.7186
	Phvul.009G081200.1	-	432	Pkinase	PF00069.30	263	1e-46	160.5	0	1	1	9.5e-48	1.9e-46	159.6	0	2	258	153	417	152	422	0.85	97.7186
	Phvul.001G265500.1	-	931	Pkinase	PF00069.30	263	1.2e-46	160.2	0	1	1	8.5e-48	1.7e-46	159.7	0	2	258	585	857	584	860	0.84	97.7186
	Phvul.003G193100.1	-	602	Pkinase	PF00069.30	263	1.3e-46	160.2	0	1	1	9.9e-48	2e-46	159.5	0	3	259	315	581	313	583	0.86	97.7186
	Phvul.009G233300.2	-	423	Pkinase	PF00069.30	263	1.5e-46	159.9	0	1	1	1.1e-47	2.2e-46	159.4	0	2	258	113	380	112	385	0.82	97.7186
	Phvul.011G194200.2	-	475	Pkinase	PF00069.30	263	1.6e-46	159.9	0	1	1	1.1e-47	2.3e-46	159.4	0	2	258	158	425	157	428	0.82	97.7186
	Phvul.009G233300.1	-	446	Pkinase	PF00069.30	263	1.7e-46	159.8	0	1	1	1.3e-47	2.6e-46	159.2	0	2	258	136	403	135	408	0.82	97.7186
	Phvul.008G007900.3	-	680	Pkinase	PF00069.30	263	2.1e-46	159.4	0	1	1	1.7e-47	3.4e-46	158.8	0	3	259	356	625	354	626	0.82	97.7186
	Phvul.008G007900.2	-	675	Pkinase	PF00069.30	263	2.2e-46	159.4	0	1	1	1.6e-47	3.3e-46	158.8	0	3	259	351	620	349	621	0.82	97.7186
	Phvul.008G007900.1	-	683	Pkinase	PF00069.30	263	2.2e-46	159.4	0	1	1	1.7e-47	3.4e-46	158.8	0	3	259	359	628	357	629	0.82	97.7186
	Phvul.002G007600.1	-	1005	Pkinase	PF00069.30	263	2.3e-46	159.4	0	1	1	1.5e-47	3.1e-46	158.9	0	3	259	687	954	685	956	0.86	97.7186
	Phvul.010G018300.2	-	886	Pkinase	PF00069.30	263	2.3e-46	159.4	0	1	1	1.6e-47	3.3e-46	158.8	0	3	259	599	866	597	868	0.86	97.7186
	Phvul.010G018300.1	-	904	Pkinase	PF00069.30	263	2.4e-46	159.3	0	1	1	1.7e-47	3.4e-46	158.8	0	3	259	617	884	615	886	0.86	97.7186
	Phvul.006G020700.1	-	396	Pkinase	PF00069.30	263	2.7e-46	159.1	0	1	1	2.1e-47	4.3e-46	158.5	0	2	258	73	350	72	353	0.82	97.7186
	Phvul.002G215300.1	-	663	Pkinase	PF00069.30	263	3.4e-46	158.8	0	1	1	2.3e-47	4.6e-46	158.3	0	3	259	382	647	380	649	0.82	97.7186
	Phvul.005G110400.1	-	834	Pkinase	PF00069.30	263	3.6e-46	158.7	0	1	1	3.1e-47	6.3e-46	157.9	0	3	259	498	765	496	767	0.84	97.7186
	Phvul.001G040700.1	-	672	Pkinase	PF00069.30	263	3.8e-46	158.6	0	1	1	2.6e-47	5.2e-46	158.2	0	3	259	359	622	357	624	0.84	97.7186
	Phvul.008G080000.2	-	659	Pkinase	PF00069.30	263	3.9e-46	158.6	0	1	1	2.6e-47	5.4e-46	158.1	0	3	259	331	594	329	596	0.86	97.7186
	Phvul.006G133200.1	-	944	Pkinase	PF00069.30	263	4.8e-46	158.3	0	1	1	3.6e-47	7.4e-46	157.7	0	3	259	620	885	618	887	0.86	97.7186
	Phvul.007G031100.1	-	661	Pkinase	PF00069.30	263	5e-46	158.2	0	1	1	3.5e-47	7.2e-46	157.7	0	3	259	330	598	328	600	0.85	97.7186
	Phvul.007G031100.2	-	676	Pkinase	PF00069.30	263	5e-46	158.2	0	1	1	3.7e-47	7.6e-46	157.6	0	3	259	345	613	343	615	0.85	97.7186
	Phvul.007G050500.1	-	669	Pkinase	PF00069.30	263	8.1e-46	157.5	0	1	1	6e-47	1.2e-45	157	0	2	258	342	611	341	613	0.88	97.7186
	Phvul.002G115900.1	-	393	Pkinase	PF00069.30	263	1.5e-45	156.7	0	1	1	1e-46	2.1e-45	156.2	0	3	259	86	364	84	367	0.81	97.7186
	Phvul.002G125100.1	-	595	Pkinase	PF00069.30	263	1.8e-45	156.4	0	1	1	1.3e-46	2.6e-45	155.9	0	3	259	312	575	310	577	0.85	97.7186
	Phvul.006G180200.1	-	930	Pkinase	PF00069.30	263	1.9e-45	156.3	0	1	1	1.3e-46	2.7e-45	155.9	0	3	259	611	875	609	878	0.84	97.7186
	Phvul.003G231350.1	-	1017	Pkinase	PF00069.30	263	1.9e-45	156.3	0	1	1	1.3e-46	2.6e-45	155.9	0	3	259	695	962	693	964	0.88	97.7186
	Phvul.003G231350.2	-	1017	Pkinase	PF00069.30	263	1.9e-45	156.3	0	1	1	1.3e-46	2.6e-45	155.9	0	3	259	695	962	693	964	0.88	97.7186
	Phvul.003G231350.3	-	1017	Pkinase	PF00069.30	263	1.9e-45	156.3	0	1	1	1.3e-46	2.6e-45	155.9	0	3	259	695	962	693	964	0.88	97.7186
	Phvul.003G231350.4	-	1017	Pkinase	PF00069.30	263	1.9e-45	156.3	0	1	1	1.3e-46	2.6e-45	155.9	0	3	259	695	962	693	964	0.88	97.7186
	Phvul.003G231400.1	-	1018	Pkinase	PF00069.30	263	1.9e-45	156.3	0	1	1	1.3e-46	2.6e-45	155.9	0	3	259	695	962	693	964	0.88	97.7186
	Phvul.001G176800.1	-	375	Pkinase	PF00069.30	263	2.8e-45	155.8	0	1	1	1.7e-46	3.5e-45	155.5	0	2	258	49	317	48	320	0.81	97.7186
	Phvul.008G244600.1	-	439	Pkinase	PF00069.30	263	2.9e-45	155.7	0	1	1	1.8e-46	3.7e-45	155.4	0	2	258	129	394	128	399	0.88	97.7186
	Phvul.008G213200.1	-	1023	Pkinase	PF00069.30	263	3.1e-45	155.6	0	1	1	2.2e-46	4.4e-45	155.1	0	4	260	734	1000	731	1003	0.86	97.7186
	Phvul.003G249300.1	-	695	Pkinase	PF00069.30	263	3.1e-45	155.6	0	1	1	2.1e-46	4.3e-45	155.2	0	2	258	332	600	331	604	0.88	97.7186
	Phvul.006G146400.1	-	623	Pkinase	PF00069.30	263	3.7e-45	155.4	0	1	1	2.5e-46	5e-45	154.9	0	2	258	326	592	325	595	0.87	97.7186
	Phvul.005G088700.3	-	781	Pkinase	PF00069.30	263	5.7e-45	154.8	0	1	1	4e-46	8.1e-45	154.3	0	2	258	464	731	463	734	0.81	97.7186
	Phvul.005G088700.1	-	819	Pkinase	PF00069.30	263	6.1e-45	154.7	0	1	1	4.4e-46	8.9e-45	154.1	0	2	258	502	769	501	772	0.81	97.7186
	Phvul.009G023900.1	-	444	Pkinase	PF00069.30	263	7.1e-45	154.4	0	1	1	4.8e-46	9.9e-45	154	0	3	259	129	396	127	399	0.83	97.7186
	Phvul.008G234600.1	-	507	Pkinase	PF00069.30	263	9e-45	154.1	0	1	1	6.1e-46	1.3e-44	153.7	0	2	258	169	445	168	447	0.8	97.7186
	Phvul.006G029000.1	-	1017	Pkinase	PF00069.30	263	9.2e-45	154.1	0	1	1	6.4e-46	1.3e-44	153.6	0	3	259	735	1003	733	1005	0.83	97.7186
	Phvul.007G048500.1	-	677	Pkinase	PF00069.30	263	1.3e-44	153.6	0	1	1	9.6e-46	2e-44	153	0	2	258	346	612	345	615	0.79	97.7186
	Phvul.007G268200.2	-	910	Pkinase	PF00069.30	263	1.3e-44	153.6	0	1	1	8.9e-46	1.8e-44	153.1	0	2	258	565	837	564	839	0.81	97.7186
	Phvul.007G268200.1	-	958	Pkinase	PF00069.30	263	1.4e-44	153.5	0	1	1	9.8e-46	2e-44	153	0	2	258	613	885	612	887	0.81	97.7186
	Phvul.005G005900.1	-	1229	Pkinase	PF00069.30	263	1.5e-44	153.4	0	1	1	1e-45	2.1e-44	152.9	0	3	259	932	1202	930	1204	0.81	97.7186
	Phvul.007G067700.1	-	1290	Pkinase	PF00069.30	263	1.9e-44	153.1	0	1	1	1.3e-45	2.6e-44	152.6	0	2	258	1013	1281	1012	1284	0.83	97.7186
	Phvul.007G086800.1	-	624	Pkinase	PF00069.30	263	7.5e-44	151.1	0	1	1	4.8e-45	9.7e-44	150.7	0	2	258	302	572	301	575	0.82	97.7186
	Phvul.009G227001.1	-	461	Pkinase	PF00069.30	263	1.3e-43	150.3	0	1	1	8.9e-45	1.8e-43	149.8	0	3	259	81	354	79	356	0.8	97.7186
	Phvul.009G061350.1	-	534	Pkinase	PF00069.30	263	2.4e-43	149.4	0	1	1	1.6e-44	3.2e-43	149	0	2	258	162	432	161	435	0.85	97.7186
	Phvul.003G239300.2	-	832	Pkinase	PF00069.30	263	2.8e-43	149.2	0	1	1	2e-44	4e-43	148.7	0	2	258	490	756	489	759	0.84	97.7186
	Phvul.006G170500.4	-	907	Pkinase	PF00069.30	263	3.1e-43	149.1	0	1	1	2.2e-44	4.4e-43	148.6	0	3	259	565	832	563	834	0.83	97.7186
	Phvul.006G170500.2	-	931	Pkinase	PF00069.30	263	3.3e-43	149	0	1	1	2.3e-44	4.6e-43	148.5	0	3	259	589	856	587	858	0.83	97.7186
	Phvul.001G075500.1	-	617	Pkinase	PF00069.30	263	3.4e-43	148.9	0	1	1	2.6e-44	5.3e-43	148.3	0	4	260	311	576	309	578	0.88	97.7186
	Phvul.006G170500.3	-	1011	Pkinase	PF00069.30	263	3.7e-43	148.8	0	1	1	2.6e-44	5.4e-43	148.3	0	3	259	669	936	667	938	0.83	97.7186
	Phvul.006G170500.1	-	1015	Pkinase	PF00069.30	263	3.8e-43	148.8	0	1	1	2.7e-44	5.4e-43	148.3	0	3	259	673	940	671	942	0.83	97.7186
	Phvul.004G086300.2	-	467	Pkinase	PF00069.30	263	4.1e-43	148.7	0	1	1	2.5e-44	5.1e-43	148.4	0	2	258	145	415	144	418	0.81	97.7186
	Phvul.009G114500.1	-	981	Pkinase	PF00069.30	263	5.9e-43	148.2	0	1	1	4.5e-44	9.2e-43	147.5	0	3	259	667	951	665	953	0.82	97.7186
	Phvul.004G086300.1	-	624	Pkinase	PF00069.30	263	8.2e-43	147.7	0	1	1	5.1e-44	1e-42	147.3	0	2	258	302	572	301	575	0.81	97.7186
	Phvul.011G081200.1	-	612	Pkinase	PF00069.30	263	8.4e-43	147.7	0	1	1	6.2e-44	1.3e-42	147.1	0	3	259	229	504	227	507	0.89	97.7186
	Phvul.005G178500.1	-	366	Pkinase	PF00069.30	263	1.6e-42	146.8	0	1	1	9.5e-44	1.9e-42	146.5	0	2	258	41	308	40	311	0.81	97.7186
	Phvul.002G080400.1	-	620	Pkinase	PF00069.30	263	1.8e-42	146.6	0	1	1	1.2e-43	2.4e-42	146.2	0	3	259	334	606	332	608	0.86	97.7186
	Phvul.008G211200.1	-	608	Pkinase	PF00069.30	263	2e-42	146.4	0	1	1	1.5e-43	3e-42	145.9	0	2	258	311	577	310	580	0.86	97.7186
	Phvul.004G046800.1	-	626	Pkinase	PF00069.30	263	4.7e-42	145.2	0	1	1	3.4e-43	6.9e-42	144.7	0	2	258	306	571	305	574	0.86	97.7186
	Phvul.008G211100.2	-	347	Pkinase	PF00069.30	263	1.2e-41	143.9	0	1	1	7.4e-43	1.5e-41	143.5	0	2	258	52	318	51	321	0.86	97.7186
	Phvul.008G017400.1	-	1018	Pkinase	PF00069.30	263	3.8e-41	142.2	0	1	1	2.8e-42	5.7e-41	141.7	0	3	259	733	1002	731	1005	0.85	97.7186
	Phvul.011G112700.1	-	814	Pkinase	PF00069.30	263	4.4e-41	142	0	1	1	3e-42	6.2e-41	141.5	0	2	258	525	795	524	797	0.86	97.7186
	Phvul.001G246800.2	-	851	Pkinase	PF00069.30	263	1.1e-40	140.7	0	1	1	8.1e-42	1.6e-40	140.1	0	4	260	567	831	564	832	0.82	97.7186
	Phvul.010G064300.1	-	851	Pkinase	PF00069.30	263	1.2e-40	140.6	0	1	1	8.4e-42	1.7e-40	140.1	0	4	260	565	829	562	830	0.82	97.7186
	Phvul.007G168100.1	-	626	Pkinase	PF00069.30	263	2.1e-40	139.8	0	1	1	1.5e-41	3e-40	139.3	0	3	259	285	555	283	557	0.79	97.7186
	Phvul.005G106800.1	-	807	Pkinase	PF00069.30	263	3e-40	139.3	0	1	1	2.2e-41	4.4e-40	138.7	0	2	258	519	789	518	791	0.85	97.7186
	Phvul.001G252800.2	-	582	Pkinase	PF00069.30	263	3.6e-40	139	0	1	1	2.3e-41	4.8e-40	138.6	0	2	258	260	530	259	533	0.8	97.7186
	Phvul.001G252800.3	-	581	Pkinase	PF00069.30	263	3.6e-40	139	0	1	1	2.3e-41	4.8e-40	138.6	0	2	258	259	529	258	532	0.8	97.7186
	Phvul.001G252800.1	-	604	Pkinase	PF00069.30	263	3.9e-40	138.9	0	1	1	2.6e-41	5.2e-40	138.5	0	2	258	282	552	281	555	0.8	97.7186
	Phvul.001G252800.4	-	603	Pkinase	PF00069.30	263	3.9e-40	138.9	0	1	1	2.5e-41	5.2e-40	138.5	0	2	258	281	551	280	554	0.8	97.7186
	Phvul.008G220100.1	-	834	Pkinase	PF00069.30	263	1.8e-39	136.7	0	1	1	1.3e-40	2.7e-39	136.2	0	4	260	547	811	544	812	0.82	97.7186
	Phvul.001G137300.2	-	794	Pkinase	PF00069.30	263	7.3e-39	134.7	0	1	1	5.1e-40	1e-38	134.3	0	3	259	504	769	502	771	0.84	97.7186
	Phvul.001G137300.1	-	884	Pkinase	PF00069.30	263	8.5e-39	134.5	0	1	1	6.2e-40	1.3e-38	134	0	3	259	594	859	592	861	0.84	97.7186
	Phvul.009G260500.1	-	1125	Pkinase	PF00069.30	263	1.7e-38	133.5	0	1	1	1.2e-39	2.4e-38	133.1	0	3	259	843	1110	841	1112	0.81	97.7186
	Phvul.009G046600.1	-	796	Pkinase	PF00069.30	263	2.7e-38	132.9	0	1	1	2.6e-39	5.2e-38	132	0	3	259	480	784	478	786	0.77	97.7186
	Phvul.011G064000.2	-	410	Pkinase	PF00069.30	263	5.8e-38	131.8	0	1	1	4.5e-39	9.2e-38	131.1	0	3	259	81	359	79	361	0.79	97.7186
	Phvul.009G046900.1	-	993	Pkinase	PF00069.30	263	1.9e-37	130.1	0	1	1	1.5e-38	3e-37	129.5	0	3	259	677	981	675	983	0.78	97.7186
	Phvul.002G146300.1	-	435	Pkinase	PF00069.30	263	8.8e-36	124.6	0	1	1	5.8e-37	1.2e-35	124.2	0	3	259	123	386	121	388	0.83	97.7186
	Phvul.002G215000.1	-	664	Pkinase	PF00069.30	263	1.8e-35	123.6	0	1	1	9.8e-35	2e-33	116.9	0	3	259	350	596	348	600	0.81	97.7186
	Phvul.002G152100.1	-	884	Pkinase	PF00069.30	263	1.9e-34	120.3	0	1	1	1.3e-35	2.7e-34	119.8	0	3	259	598	872	596	874	0.81	97.7186
	Phvul.001G140900.2	-	410	Pkinase	PF00069.30	263	1.9e-27	97.3	0	1	1	1.3e-28	2.6e-27	96.9	0	3	259	119	388	117	390	0.84	97.7186
	Phvul.004G128100.1	-	684	Pkinase	PF00069.30	263	2.6e-26	93.6	0	1	1	1.7e-27	3.5e-26	93.2	0	3	259	414	675	412	677	0.85	97.7186
	Phvul.007G112100.1	-	676	Pkinase	PF00069.30	263	2e-22	80.9	0	1	1	1.4e-23	2.8e-22	80.4	0	3	259	406	667	404	669	0.85	97.7186
	Phvul.002G217900.1	-	611	Pkinase	PF00069.30	263	2.8e-22	80.4	0	1	1	5.6e-23	1.1e-21	78.4	0	2	258	328	576	327	580	0.86	97.7186
	Phvul.004G175100.1	-	1494	Pkinase	PF00069.30	263	2.2e-21	77.4	0	1	1	1.7e-22	3.6e-21	76.8	0	3	259	29	292	27	295	0.84	97.7186
	Phvul.004G175100.2	-	1532	Pkinase	PF00069.30	263	2.3e-21	77.4	0	1	1	1.8e-22	3.7e-21	76.7	0	3	259	29	292	27	295	0.84	97.7186
	Phvul.009G167600.3	-	657	Pkinase	PF00069.30	263	2e-15	57.9	0	1	1	2.2e-16	4.4e-15	56.8	0	2	258	378	638	377	641	0.83	97.7186
	Phvul.009G167600.1	-	763	Pkinase	PF00069.30	263	2.9e-15	57.4	0	1	1	3e-16	6.1e-15	56.3	0	2	258	484	744	483	747	0.83	97.7186
	Phvul.009G167600.2	-	763	Pkinase	PF00069.30	263	2.9e-15	57.4	0	1	1	3e-16	6.1e-15	56.3	0	2	258	484	744	483	747	0.83	97.7186
	Phvul.002G112500.4	-	346	Pkinase	PF00069.30	263	1.7e-63	215.5	0	1	1	1.1e-64	2.3e-63	215	0	3	258	72	316	70	320	0.94	97.3384
	Phvul.002G112500.3	-	368	Pkinase	PF00069.30	263	2e-63	215.3	0	1	1	1.4e-64	2.8e-63	214.8	0	3	258	94	338	92	342	0.94	97.3384
	Phvul.002G112500.2	-	402	Pkinase	PF00069.30	263	2.5e-63	214.9	0	1	1	1.8e-64	3.7e-63	214.4	0	3	258	128	372	126	376	0.94	97.3384
	Phvul.009G020600.1	-	548	Pkinase	PF00069.30	263	5.2e-63	213.9	0	1	1	3.7e-64	7.6e-63	213.4	0	4	259	289	533	286	535	0.94	97.3384
	Phvul.009G020600.3	-	559	Pkinase	PF00069.30	263	5.5e-63	213.8	0	1	1	3.9e-64	8e-63	213.3	0	4	259	300	544	297	546	0.94	97.3384
	Phvul.009G020600.2	-	567	Pkinase	PF00069.30	263	5.6e-63	213.8	0	1	1	4e-64	8.2e-63	213.2	0	4	259	308	552	305	554	0.94	97.3384
	Phvul.002G112500.1	-	572	Pkinase	PF00069.30	263	5.7e-63	213.8	0	1	1	4.5e-64	9.1e-63	213.1	0	3	258	298	542	296	546	0.94	97.3384
	Phvul.007G223500.1	-	836	Pkinase	PF00069.30	263	1.3e-58	199.5	0	1	1	8.9e-60	1.8e-58	199	0	4	259	565	814	562	816	0.92	97.3384
	Phvul.001G186600.1	-	817	Pkinase	PF00069.30	263	1.2e-57	196.3	0	1	1	8.7e-59	1.8e-57	195.8	0	4	259	546	795	543	797	0.92	97.3384
	Phvul.008G083700.1	-	368	Pkinase	PF00069.30	263	1.8e-56	192.5	0	1	1	1.3e-57	2.6e-56	192	0	4	259	54	310	52	312	0.91	97.3384
	Phvul.008G083700.3	-	368	Pkinase	PF00069.30	263	1.8e-56	192.5	0	1	1	1.3e-57	2.6e-56	192	0	4	259	54	310	52	312	0.91	97.3384
	Phvul.010G068300.1	-	370	Pkinase	PF00069.30	263	1.5e-55	189.5	0	1	1	1e-56	2.1e-55	189	0	4	259	56	312	54	314	0.91	97.3384
	Phvul.004G004800.1	-	352	Pkinase	PF00069.30	263	2.5e-54	185.5	0	1	1	1.6e-55	3.3e-54	185	0	5	260	30	285	27	287	0.91	97.3384
	Phvul.001G096600.1	-	352	Pkinase	PF00069.30	263	3.3e-54	185	0	1	1	2.2e-55	4.5e-54	184.6	0	5	260	30	285	27	287	0.91	97.3384
	Phvul.007G245500.5	-	651	Pkinase	PF00069.30	263	4.4e-54	184.6	0	1	1	3.5e-55	7.2e-54	183.9	0	4	259	391	640	388	644	0.92	97.3384
	Phvul.007G245500.2	-	655	Pkinase	PF00069.30	263	4.5e-54	184.6	0	1	1	3.6e-55	7.3e-54	183.9	0	4	259	395	644	392	648	0.92	97.3384
	Phvul.007G245500.3	-	655	Pkinase	PF00069.30	263	4.5e-54	184.6	0	1	1	3.6e-55	7.3e-54	183.9	0	4	259	395	644	392	648	0.92	97.3384
	Phvul.007G245500.4	-	655	Pkinase	PF00069.30	263	4.5e-54	184.6	0	1	1	3.6e-55	7.3e-54	183.9	0	4	259	395	644	392	648	0.92	97.3384
	Phvul.009G174100.1	-	352	Pkinase	PF00069.30	263	4.3e-53	181.4	0	1	1	2.8e-54	5.7e-53	181	0	5	260	30	285	27	287	0.9	97.3384
	Phvul.001G051100.1	-	812	Pkinase	PF00069.30	263	8.8e-53	180.4	0	1	1	6.2e-54	1.3e-52	179.9	0	4	259	496	761	493	763	0.87	97.3384
	Phvul.010G057100.1	-	799	Pkinase	PF00069.30	263	2.7e-52	178.8	0	1	1	1.9e-53	3.9e-52	178.2	0	4	259	516	790	514	793	0.86	97.3384
	Phvul.010G088500.2	-	727	Pkinase	PF00069.30	263	2.8e-52	178.7	0	1	1	2.1e-53	4.3e-52	178.1	0	4	259	445	718	443	720	0.87	97.3384
	Phvul.010G088500.1	-	799	Pkinase	PF00069.30	263	3.4e-52	178.5	0	1	1	2.6e-53	5.2e-52	177.8	0	4	259	517	790	515	792	0.87	97.3384
	Phvul.008G124800.1	-	768	Pkinase	PF00069.30	263	5.9e-52	177.7	0	1	1	4.3e-53	8.7e-52	177.1	0	4	259	488	757	486	759	0.9	97.3384
	Phvul.008G124900.1	-	781	Pkinase	PF00069.30	263	9.8e-52	176.9	0	1	1	6.9e-53	1.4e-51	176.4	0	4	259	511	778	509	780	0.9	97.3384
	Phvul.008G025200.1	-	421	Pkinase	PF00069.30	263	1.7e-51	176.2	0	1	1	1.2e-52	2.4e-51	175.7	0	4	259	118	372	115	375	0.92	97.3384
	Phvul.004G016900.1	-	366	Pkinase	PF00069.30	263	1.8e-51	176.1	0	1	1	1.2e-52	2.5e-51	175.6	0	4	259	66	335	63	338	0.91	97.3384
	Phvul.004G085800.1	-	838	Pkinase	PF00069.30	263	2.2e-51	175.8	0	1	1	1.6e-52	3.3e-51	175.2	0	4	259	489	758	487	760	0.85	97.3384
	Phvul.008G124300.1	-	785	Pkinase	PF00069.30	263	3.7e-51	175	0	1	1	2.8e-52	5.8e-51	174.4	0	4	259	510	778	508	780	0.89	97.3384
	Phvul.008G263900.1	-	464	Pkinase	PF00069.30	263	9.4e-51	173.7	0.2	1	1	1.4e-51	2.9e-50	172.1	0	4	259	139	406	136	409	0.85	97.3384
	Phvul.003G199400.1	-	386	Pkinase	PF00069.30	263	1e-50	173.6	0	1	1	9.4e-52	1.9e-50	172.7	0	4	259	86	355	83	357	0.92	97.3384
	Phvul.009G068100.1	-	797	Pkinase	PF00069.30	263	1.4e-50	173.1	0	1	1	1.1e-51	2.3e-50	172.5	0	4	259	513	785	511	788	0.89	97.3384
	Phvul.003G204500.1	-	670	Pkinase	PF00069.30	263	2.6e-50	172.3	0	1	1	1.8e-51	3.6e-50	171.8	0	3	258	367	631	365	634	0.85	97.3384
	Phvul.001G040400.1	-	636	Pkinase	PF00069.30	263	4.4e-50	171.5	0	1	1	3.2e-51	6.6e-50	171	0	3	258	341	604	339	607	0.82	97.3384
	Phvul.001G068800.1	-	411	Pkinase	PF00069.30	263	8.4e-50	170.6	0.1	1	1	6.3e-51	1.3e-49	170	0.1	4	259	90	355	88	357	0.87	97.3384
	Phvul.007G051500.1	-	667	Pkinase	PF00069.30	263	8.8e-50	170.5	0	1	1	6.8e-51	1.4e-49	169.9	0	2	257	349	615	348	618	0.84	97.3384
	Phvul.006G084900.3	-	669	Pkinase	PF00069.30	263	9.4e-50	170.5	0	1	1	6.6e-51	1.3e-49	169.9	0	3	258	351	618	349	620	0.85	97.3384
	Phvul.007G260300.1	-	670	Pkinase	PF00069.30	263	1e-49	170.3	0	1	1	7.5e-51	1.5e-49	169.8	0	4	259	343	621	340	623	0.83	97.3384
	Phvul.006G039500.1	-	391	Pkinase	PF00069.30	263	1.2e-49	170.1	0	1	1	1.3e-50	2.7e-49	168.9	0	3	258	89	358	87	363	0.84	97.3384
	Phvul.010G100700.1	-	437	Pkinase	PF00069.30	263	1.6e-49	169.7	0	1	1	9.5e-51	1.9e-49	169.4	0	6	261	136	406	131	408	0.85	97.3384
	Phvul.003G139200.1	-	462	Pkinase	PF00069.30	263	2.2e-49	169.3	0	1	1	1.5e-50	3e-49	168.8	0	4	259	160	428	157	430	0.87	97.3384
	Phvul.007G134500.1	-	1168	Pkinase	PF00069.30	263	2.6e-49	169	0	1	1	2.5e-50	5.1e-49	168	0	2	257	889	1147	888	1150	0.89	97.3384
	Phvul.007G260400.2	-	450	Pkinase	PF00069.30	263	2.6e-49	169	0	1	1	1.8e-50	3.6e-49	168.5	0	4	259	125	403	122	405	0.84	97.3384
	Phvul.001G048050.2	-	584	Pkinase	PF00069.30	263	5.6e-49	167.9	0	1	1	4.1e-50	8.3e-49	167.3	0	4	259	287	552	285	554	0.86	97.3384
	Phvul.001G048050.3	-	572	Pkinase	PF00069.30	263	5.7e-49	167.9	0	1	1	3.9e-50	7.9e-49	167.4	0	4	259	275	540	273	542	0.86	97.3384
	Phvul.001G069900.1	-	351	Pkinase	PF00069.30	263	6.1e-49	167.8	0.1	1	1	4.2e-50	8.5e-49	167.3	0.1	4	259	18	283	16	285	0.87	97.3384
	Phvul.001G048600.2	-	561	Pkinase	PF00069.30	263	6.3e-49	167.7	0.1	1	1	4.5e-50	9.2e-49	167.2	0.1	4	259	264	529	262	531	0.86	97.3384
	Phvul.011G109100.2	-	637	Pkinase	PF00069.30	263	6.4e-49	167.7	0	1	1	5.8e-50	1.2e-48	166.8	0	4	259	309	574	307	576	0.85	97.3384
	Phvul.005G177900.1	-	812	Pkinase	PF00069.30	263	6.6e-49	167.7	0	1	1	5e-50	1e-48	167.1	0	4	259	494	759	492	761	0.87	97.3384
	Phvul.001G048050.1	-	637	Pkinase	PF00069.30	263	6.7e-49	167.6	0	1	1	5e-50	1e-48	167.1	0	4	259	340	605	338	607	0.86	97.3384
	Phvul.001G048600.1	-	625	Pkinase	PF00069.30	263	8.1e-49	167.4	0.1	1	1	5.8e-50	1.2e-48	166.8	0.1	4	259	328	593	326	595	0.86	97.3384
	Phvul.010G060800.1	-	662	Pkinase	PF00069.30	263	9e-49	167.2	0	1	1	6.3e-50	1.3e-48	166.7	0	3	258	349	610	347	614	0.83	97.3384
	Phvul.011G214400.1	-	812	Pkinase	PF00069.30	263	1e-48	167.1	0	1	1	7.8e-50	1.6e-48	166.4	0	4	259	525	790	523	792	0.85	97.3384
	Phvul.001G049000.1	-	619	Pkinase	PF00069.30	263	1.1e-48	167	0	1	1	7.7e-50	1.6e-48	166.4	0	4	259	322	587	320	589	0.86	97.3384
	Phvul.006G084500.1	-	638	Pkinase	PF00069.30	263	1.2e-48	166.9	0	1	1	8e-50	1.6e-48	166.4	0	2	257	323	590	322	593	0.85	97.3384
	Phvul.009G089500.4	-	415	Pkinase	PF00069.30	263	1.4e-48	166.6	0	1	1	8.8e-50	1.8e-48	166.2	0	4	259	130	395	127	398	0.81	97.3384
	Phvul.009G089500.3	-	416	Pkinase	PF00069.30	263	1.4e-48	166.6	0	1	1	8.9e-50	1.8e-48	166.2	0	4	259	131	396	128	399	0.81	97.3384
	Phvul.009G089500.2	-	417	Pkinase	PF00069.30	263	1.4e-48	166.6	0	1	1	8.9e-50	1.8e-48	166.2	0	4	259	132	397	129	400	0.81	97.3384
	Phvul.009G089500.1	-	418	Pkinase	PF00069.30	263	1.4e-48	166.6	0	1	1	9e-50	1.8e-48	166.2	0	4	259	133	398	130	401	0.81	97.3384
	Phvul.001G049200.1	-	330	Pkinase	PF00069.30	263	1.5e-48	166.5	0.1	1	1	1e-49	2e-48	166.1	0.1	4	259	32	297	30	299	0.88	97.3384
	Phvul.001G070200.1	-	428	Pkinase	PF00069.30	263	1.6e-48	166.4	0.1	1	1	1.2e-49	2.4e-48	165.8	0.1	4	259	107	372	105	374	0.87	97.3384
	Phvul.009G190400.3	-	553	Pkinase	PF00069.30	263	2.4e-48	165.8	0	1	1	1.7e-49	3.4e-48	165.3	0	4	259	269	532	266	534	0.83	97.3384
	Phvul.009G190400.2	-	554	Pkinase	PF00069.30	263	2.4e-48	165.8	0	1	1	1.7e-49	3.4e-48	165.3	0	4	259	270	533	267	535	0.83	97.3384
	Phvul.011G142200.1	-	436	Pkinase	PF00069.30	263	2.7e-48	165.7	0	1	1	1.9e-49	3.8e-48	165.2	0	4	259	116	374	113	376	0.88	97.3384
	Phvul.001G047800.1	-	331	Pkinase	PF00069.30	263	2.7e-48	165.7	0.1	1	1	1.7e-49	3.5e-48	165.3	0.1	4	259	34	299	32	302	0.86	97.3384
	Phvul.009G190400.4	-	604	Pkinase	PF00069.30	263	2.9e-48	165.5	0	1	1	2.1e-49	4.2e-48	165	0	4	259	320	583	317	585	0.83	97.3384
	Phvul.009G190400.1	-	605	Pkinase	PF00069.30	263	2.9e-48	165.5	0	1	1	2.1e-49	4.2e-48	165	0	4	259	321	584	318	586	0.83	97.3384
	Phvul.003G226700.1	-	378	Pkinase	PF00069.30	263	4.2e-48	165.1	0	1	1	2.7e-49	5.5e-48	164.6	0	4	259	69	345	66	351	0.8	97.3384
	Phvul.010G032000.1	-	832	Pkinase	PF00069.30	263	4.3e-48	165	0.1	1	1	3.5e-49	7.1e-48	164.3	0.1	4	259	542	808	540	810	0.83	97.3384
	Phvul.002G046100.1	-	810	Pkinase	PF00069.30	263	4.3e-48	165	0	1	1	3.4e-49	7e-48	164.3	0	4	259	524	795	522	797	0.8	97.3384
	Phvul.002G046100.2	-	810	Pkinase	PF00069.30	263	4.3e-48	165	0	1	1	3.4e-49	7e-48	164.3	0	4	259	524	795	522	797	0.8	97.3384
	Phvul.011G003200.1	-	974	Pkinase	PF00069.30	263	4.8e-48	164.9	0	1	1	3.2e-49	6.6e-48	164.4	0	4	259	683	949	680	952	0.87	97.3384
	Phvul.011G003200.2	-	974	Pkinase	PF00069.30	263	4.8e-48	164.9	0	1	1	3.2e-49	6.6e-48	164.4	0	4	259	683	949	680	952	0.87	97.3384
	Phvul.008G174900.1	-	633	Pkinase	PF00069.30	263	5.9e-48	164.5	0.3	1	1	4.3e-49	8.7e-48	164	0.3	4	259	320	588	318	590	0.84	97.3384
	Phvul.007G051300.1	-	669	Pkinase	PF00069.30	263	6.6e-48	164.4	0	1	1	4.6e-49	9.4e-48	163.9	0	4	259	346	612	343	614	0.84	97.3384
	Phvul.008G174900.2	-	698	Pkinase	PF00069.30	263	7.3e-48	164.3	0.3	1	1	5.3e-49	1.1e-47	163.7	0.3	4	259	385	653	383	655	0.84	97.3384
	Phvul.001G069200.1	-	384	Pkinase	PF00069.30	263	7.4e-48	164.2	0.1	1	1	5e-49	1e-47	163.8	0.1	4	259	63	328	60	330	0.86	97.3384
	Phvul.008G175100.1	-	679	Pkinase	PF00069.30	263	7.6e-48	164.2	0.3	1	1	5.6e-49	1.1e-47	163.6	0.3	4	259	366	634	364	636	0.84	97.3384
	Phvul.008G043900.1	-	476	Pkinase	PF00069.30	263	9.4e-48	163.9	0	1	1	7.4e-49	1.5e-47	163.2	0	4	259	126	402	123	406	0.83	97.3384
	Phvul.008G043900.2	-	475	Pkinase	PF00069.30	263	9.5e-48	163.9	0	1	1	7.3e-49	1.5e-47	163.2	0	4	259	125	401	122	405	0.83	97.3384
	Phvul.008G043900.3	-	475	Pkinase	PF00069.30	263	1.1e-47	163.6	0	1	1	8.7e-49	1.8e-47	163	0	4	259	126	401	123	405	0.84	97.3384
	Phvul.008G043900.4	-	474	Pkinase	PF00069.30	263	1.1e-47	163.6	0	1	1	8.7e-49	1.8e-47	163	0	4	259	125	400	122	404	0.84	97.3384
	Phvul.001G069248.1	-	399	Pkinase	PF00069.30	263	1.4e-47	163.4	0	1	1	1.1e-48	2.1e-47	162.7	0	4	259	90	355	88	357	0.86	97.3384
	Phvul.006G032300.1	-	510	Pkinase	PF00069.30	263	1.5e-47	163.3	0	1	1	1.1e-48	2.3e-47	162.6	0	4	259	191	457	188	459	0.82	97.3384
	Phvul.006G137100.1	-	365	Pkinase	PF00069.30	263	2.4e-47	162.6	0.1	1	1	1.6e-48	3.2e-47	162.2	0.1	2	257	40	303	39	306	0.85	97.3384
	Phvul.007G030700.1	-	614	Pkinase	PF00069.30	263	2.4e-47	162.5	0	1	1	1.6e-48	3.3e-47	162.1	0	4	259	272	539	269	541	0.9	97.3384
	Phvul.006G137300.1	-	704	Pkinase	PF00069.30	263	2.5e-47	162.5	0.4	1	1	1.8e-48	3.7e-47	162	0.4	2	257	379	642	378	645	0.86	97.3384
	Phvul.001G048800.1	-	621	Pkinase	PF00069.30	263	4.3e-47	161.7	0	1	1	3.3e-48	6.7e-47	161.1	0	4	259	323	588	321	590	0.86	97.3384
	Phvul.007G030900.1	-	654	Pkinase	PF00069.30	263	5e-47	161.5	0	1	1	3.3e-48	6.7e-47	161.1	0	4	259	331	599	328	603	0.85	97.3384
	Phvul.001G048400.1	-	299	Pkinase	PF00069.30	263	6.5e-47	161.1	0.1	1	1	4.1e-48	8.4e-47	160.8	0.1	4	259	6	271	4	273	0.86	97.3384
	Phvul.003G062700.2	-	533	Pkinase	PF00069.30	263	7.7e-47	160.9	0	1	1	5.1e-48	1e-46	160.5	0	2	257	213	476	212	483	0.84	97.3384
	Phvul.010G145100.1	-	664	Pkinase	PF00069.30	263	9.5e-47	160.6	0	1	1	6.7e-48	1.4e-46	160.1	0	3	258	356	633	354	636	0.88	97.3384
	Phvul.011G193200.1	-	629	Pkinase	PF00069.30	263	9.7e-47	160.6	0	1	1	8e-48	1.6e-46	159.8	0	2	257	315	581	314	584	0.81	97.3384
	Phvul.006G137500.1	-	714	Pkinase	PF00069.30	263	1.1e-46	160.4	0.3	1	1	7.6e-48	1.6e-46	159.9	0.3	2	257	389	652	388	655	0.86	97.3384
	Phvul.001G075800.2	-	687	Pkinase	PF00069.30	263	1.1e-46	160.4	0	1	1	8e-48	1.6e-46	159.8	0	4	259	377	643	375	645	0.82	97.3384
	Phvul.008G245600.3	-	877	Pkinase	PF00069.30	263	1.2e-46	160.3	0	1	1	1e-47	2.1e-46	159.5	0	3	258	549	813	547	818	0.88	97.3384
	Phvul.003G062700.1	-	655	Pkinase	PF00069.30	263	1.2e-46	160.3	0	1	1	8.2e-48	1.7e-46	159.8	0	2	257	335	598	334	605	0.84	97.3384
	Phvul.010G103100.1	-	490	Pkinase	PF00069.30	263	1.2e-46	160.2	0	1	1	8.4e-48	1.7e-46	159.8	0	4	259	158	424	155	426	0.81	97.3384
	Phvul.008G245600.1	-	944	Pkinase	PF00069.30	263	1.4e-46	160	0	1	1	1.2e-47	2.4e-46	159.3	0	3	258	616	880	614	885	0.88	97.3384
	Phvul.008G245600.2	-	944	Pkinase	PF00069.30	263	1.4e-46	160	0	1	1	1.2e-47	2.4e-46	159.3	0	3	258	616	880	614	885	0.88	97.3384
	Phvul.001G232300.2	-	347	Pkinase	PF00069.30	263	1.7e-46	159.8	0	1	1	1.1e-47	2.3e-46	159.3	0	4	259	35	312	32	315	0.82	97.3384
	Phvul.009G131700.1	-	727	Pkinase	PF00069.30	263	1.7e-46	159.8	0.1	1	1	1.3e-47	2.7e-46	159.1	0.1	2	257	402	667	401	671	0.83	97.3384
	Phvul.002G242600.2	-	912	Pkinase	PF00069.30	263	1.9e-46	159.6	0	1	1	1.3e-47	2.7e-46	159.1	0	4	259	601	866	598	868	0.8	97.3384
	Phvul.001G047900.1	-	641	Pkinase	PF00069.30	263	2e-46	159.6	0.1	1	1	1.5e-47	3e-46	159	0.1	4	259	336	601	334	603	0.85	97.3384
	Phvul.008G212900.1	-	1034	Pkinase	PF00069.30	263	2e-46	159.5	0	1	1	1.6e-47	3.3e-46	158.8	0	4	259	744	1009	741	1013	0.83	97.3384
	Phvul.002G242600.1	-	985	Pkinase	PF00069.30	263	2.1e-46	159.5	0	1	1	1.5e-47	3.1e-46	158.9	0	4	259	674	939	671	941	0.8	97.3384
	Phvul.001G232300.1	-	390	Pkinase	PF00069.30	263	2.4e-46	159.3	0	1	1	1.7e-47	3.4e-46	158.8	0	4	259	78	355	75	358	0.82	97.3384
	Phvul.008G120600.1	-	410	Pkinase	PF00069.30	263	2.8e-46	159.1	0	1	1	2.3e-47	4.6e-46	158.3	0	4	259	76	353	73	355	0.81	97.3384
	Phvul.011G176400.2	-	627	Pkinase	PF00069.30	263	3.5e-46	158.7	0	1	1	2.7e-47	5.4e-46	158.1	0	2	257	309	577	308	581	0.79	97.3384
	Phvul.011G176400.3	-	625	Pkinase	PF00069.30	263	3.7e-46	158.7	0	1	1	2.8e-47	5.7e-46	158	0	2	257	309	575	308	579	0.8	97.3384
	Phvul.006G102700.1	-	862	Pkinase	PF00069.30	263	4e-46	158.5	0	1	1	2.8e-47	5.8e-46	158	0	3	258	518	786	516	791	0.82	97.3384
	Phvul.006G125300.2	-	678	Pkinase	PF00069.30	263	4.6e-46	158.3	0.1	1	1	3.4e-47	6.9e-46	157.8	0.1	2	257	366	630	365	633	0.83	97.3384
	Phvul.007G050600.1	-	661	Pkinase	PF00069.30	263	4.6e-46	158.3	0	1	1	3.3e-47	6.7e-46	157.8	0	2	257	332	598	331	602	0.82	97.3384
	Phvul.006G125300.1	-	680	Pkinase	PF00069.30	263	4.6e-46	158.3	0.1	1	1	3.4e-47	7e-46	157.8	0.1	2	257	366	630	365	633	0.83	97.3384
	Phvul.011G176400.1	-	776	Pkinase	PF00069.30	263	5.8e-46	158	0	1	1	4.5e-47	9.1e-46	157.4	0	2	257	460	726	459	730	0.8	97.3384
	Phvul.001G048900.1	-	633	Pkinase	PF00069.30	263	1e-45	157.2	0.1	1	1	7e-47	1.4e-45	156.7	0.1	4	259	324	589	321	591	0.85	97.3384
	Phvul.004G155100.1	-	362	Pkinase	PF00069.30	263	1.3e-45	156.9	0	1	1	9.9e-47	2e-45	156.3	0	4	259	65	333	62	335	0.84	97.3384
	Phvul.009G131900.1	-	750	Pkinase	PF00069.30	263	1.3e-45	156.8	0	1	1	1.1e-46	2.2e-45	156.1	0	2	257	420	685	419	688	0.84	97.3384
	Phvul.004G155400.2	-	599	Pkinase	PF00069.30	263	1.4e-45	156.8	0	1	1	1e-46	2.1e-45	156.2	0	4	259	301	570	299	572	0.86	97.3384
	Phvul.010G028300.1	-	466	Pkinase	PF00069.30	263	1.4e-45	156.7	0	1	1	1.1e-46	2.2e-45	156.1	0	4	259	169	437	167	439	0.85	97.3384
	Phvul.009G011400.2	-	380	Pkinase	PF00069.30	263	1.6e-45	156.6	0	1	1	1.2e-46	2.5e-45	156	0	4	259	64	336	61	338	0.8	97.3384
	Phvul.010G043100.1	-	429	Pkinase	PF00069.30	263	1.7e-45	156.5	0	1	1	1.1e-46	2.3e-45	156	0	4	259	78	354	75	356	0.81	97.3384
	Phvul.002G065500.1	-	485	Pkinase	PF00069.30	263	1.8e-45	156.4	0	1	1	1.4e-46	2.8e-45	155.8	0	4	259	132	407	129	409	0.82	97.3384
	Phvul.002G066400.1	-	484	Pkinase	PF00069.30	263	2e-45	156.3	0	1	1	1.5e-46	3.1e-45	155.7	0	4	259	132	407	129	409	0.82	97.3384
	Phvul.002G066400.2	-	484	Pkinase	PF00069.30	263	2e-45	156.3	0	1	1	1.5e-46	3.1e-45	155.7	0	4	259	132	407	129	409	0.82	97.3384
	Phvul.002G066400.3	-	484	Pkinase	PF00069.30	263	2e-45	156.3	0	1	1	1.5e-46	3.1e-45	155.7	0	4	259	132	407	129	409	0.82	97.3384
	Phvul.004G026000.1	-	488	Pkinase	PF00069.30	263	2.1e-45	156.2	0	1	1	1.6e-46	3.4e-45	155.5	0	4	259	138	413	135	415	0.82	97.3384
	Phvul.003G202000.1	-	656	Pkinase	PF00069.30	263	2.2e-45	156.1	0	1	1	1.4e-46	2.9e-45	155.7	0	4	259	306	569	303	572	0.91	97.3384
	Phvul.L005743.1	-	422	Pkinase	PF00069.30	263	2.2e-45	156.1	0	1	1	1.8e-46	3.7e-45	155.4	0	4	259	77	354	74	356	0.82	97.3384
	Phvul.005G054300.1	-	1124	Pkinase	PF00069.30	263	2.4e-45	156	0	1	1	1.8e-46	3.6e-45	155.4	0	3	258	817	1086	815	1089	0.83	97.3384
	Phvul.009G011400.1	-	383	Pkinase	PF00069.30	263	3.3e-45	155.6	0	1	1	2.5e-46	5.2e-45	154.9	0	4	259	64	339	61	341	0.79	97.3384
	Phvul.008G030700.1	-	858	Pkinase	PF00069.30	263	4.3e-45	155.2	0	1	1	3.7e-46	7.5e-45	154.4	0	3	258	518	784	516	789	0.88	97.3384
	Phvul.007G084400.1	-	1081	Pkinase	PF00069.30	263	5.4e-45	154.8	0	1	1	3.8e-46	7.7e-45	154.3	0	3	258	786	1053	784	1056	0.87	97.3384
	Phvul.002G115800.3	-	359	Pkinase	PF00069.30	263	6.1e-45	154.7	0	1	1	4.3e-46	8.7e-45	154.2	0	4	259	69	346	66	348	0.8	97.3384
	Phvul.002G115800.1	-	361	Pkinase	PF00069.30	263	6.2e-45	154.7	0	1	1	4.4e-46	8.9e-45	154.1	0	4	259	71	348	68	350	0.8	97.3384
	Phvul.011G108700.1	-	1011	Pkinase	PF00069.30	263	7.1e-45	154.4	0	1	1	5.3e-46	1.1e-44	153.9	0	3	258	695	961	693	963	0.83	97.3384
	Phvul.001G048200.1	-	590	Pkinase	PF00069.30	263	8.6e-45	154.2	0.1	1	1	6.3e-46	1.3e-44	153.6	0.1	4	259	292	557	290	559	0.87	97.3384
	Phvul.004G154900.1	-	525	Pkinase	PF00069.30	263	8.7e-45	154.2	0	1	1	6.6e-46	1.4e-44	153.5	0	4	259	232	500	230	502	0.83	97.3384
	Phvul.008G233400.1	-	400	Pkinase	PF00069.30	263	9.1e-45	154.1	0	1	1	6.6e-46	1.3e-44	153.5	0	4	259	74	351	71	353	0.8	97.3384
	Phvul.008G238600.1	-	947	Pkinase	PF00069.30	263	9.2e-45	154.1	0	1	1	6.4e-46	1.3e-44	153.6	0	3	258	595	866	593	869	0.84	97.3384
	Phvul.008G238600.2	-	951	Pkinase	PF00069.30	263	9.3e-45	154.1	0	1	1	6.4e-46	1.3e-44	153.6	0	3	258	595	866	593	869	0.84	97.3384
	Phvul.008G031300.1	-	339	Pkinase	PF00069.30	263	9.5e-45	154	0.1	1	1	6.3e-46	1.3e-44	153.6	0.1	2	257	45	307	44	311	0.88	97.3384
	Phvul.002G318200.1	-	631	Pkinase	PF00069.30	263	9.6e-45	154	0	1	1	7e-46	1.4e-44	153.5	0	4	259	328	596	326	598	0.87	97.3384
	Phvul.005G011200.1	-	837	Pkinase	PF00069.30	263	1e-44	153.9	0	1	1	8.2e-46	1.7e-44	153.2	0	2	257	520	786	519	789	0.82	97.3384
	Phvul.011G152000.1	-	819	Pkinase	PF00069.30	263	1.2e-44	153.7	0	1	1	9e-46	1.8e-44	153.1	0	2	257	503	769	502	772	0.83	97.3384
	Phvul.007G252500.1	-	621	Pkinase	PF00069.30	263	1.4e-44	153.5	0	1	1	1.1e-45	2.2e-44	152.9	0	4	259	318	588	315	590	0.8	97.3384
	Phvul.011G003100.1	-	802	Pkinase	PF00069.30	263	1.6e-44	153.3	0	1	1	1.1e-45	2.2e-44	152.8	0	4	259	489	768	486	770	0.84	97.3384
	Phvul.001G174500.2	-	890	Pkinase	PF00069.30	263	1.6e-44	153.3	0.1	1	1	1.1e-45	2.3e-44	152.8	0.1	3	258	564	831	562	834	0.83	97.3384
	Phvul.001G231200.1	-	514	Pkinase	PF00069.30	263	1.7e-44	153.2	0	1	1	1.2e-45	2.5e-44	152.7	0	2	257	179	451	178	454	0.8	97.3384
	Phvul.001G174500.1	-	930	Pkinase	PF00069.30	263	1.8e-44	153.2	0.1	1	1	1.2e-45	2.4e-44	152.7	0.1	3	258	604	871	602	874	0.83	97.3384
	Phvul.002G218800.1	-	424	Pkinase	PF00069.30	263	2.3e-44	152.8	0	1	1	1.6e-45	3.2e-44	152.3	0	4	259	112	372	109	374	0.86	97.3384
	Phvul.011G152200.1	-	823	Pkinase	PF00069.30	263	2.6e-44	152.6	0	1	1	2e-45	4e-44	152	0	2	257	508	774	507	777	0.81	97.3384
	Phvul.006G146100.1	-	713	Pkinase	PF00069.30	263	2.6e-44	152.6	0	1	1	1.7e-45	3.4e-44	152.2	0	4	259	407	677	404	680	0.87	97.3384
	Phvul.003G168000.2	-	410	Pkinase	PF00069.30	263	3.4e-44	152.2	0	1	1	2.5e-45	5.1e-44	151.7	0	4	259	81	355	78	357	0.81	97.3384
	Phvul.003G168000.1	-	434	Pkinase	PF00069.30	263	4e-44	152	0	1	1	3e-45	6e-44	151.4	0	4	259	105	379	102	381	0.81	97.3384
	Phvul.002G220500.1	-	838	Pkinase	PF00069.30	263	4.9e-44	151.7	0	1	1	3.5e-45	7.1e-44	151.2	0	2	257	522	787	521	790	0.83	97.3384
	Phvul.011G152100.1	-	819	Pkinase	PF00069.30	263	5e-44	151.7	0	1	1	3.7e-45	7.6e-44	151.1	0	3	258	507	772	505	775	0.78	97.3384
	Phvul.011G194401.2	-	666	Pkinase	PF00069.30	263	5.6e-44	151.5	0	1	1	4.5e-45	9.1e-44	150.8	0	2	257	351	616	350	619	0.81	97.3384
	Phvul.011G194401.1	-	667	Pkinase	PF00069.30	263	5.7e-44	151.5	0	1	1	4.5e-45	9.2e-44	150.8	0	2	257	352	617	351	620	0.81	97.3384
	Phvul.006G006700.5	-	404	Pkinase	PF00069.30	263	8.4e-44	150.9	0	1	1	6e-45	1.2e-43	150.4	0	3	258	106	373	104	376	0.86	97.3384
	Phvul.006G006700.6	-	404	Pkinase	PF00069.30	263	8.4e-44	150.9	0	1	1	6e-45	1.2e-43	150.4	0	3	258	106	373	104	376	0.86	97.3384
	Phvul.006G006700.3	-	405	Pkinase	PF00069.30	263	8.5e-44	150.9	0	1	1	6e-45	1.2e-43	150.4	0	3	258	107	374	105	377	0.86	97.3384
	Phvul.006G006700.4	-	405	Pkinase	PF00069.30	263	8.5e-44	150.9	0	1	1	6e-45	1.2e-43	150.4	0	3	258	107	374	105	377	0.86	97.3384
	Phvul.009G083300.1	-	383	Pkinase	PF00069.30	263	9.6e-44	150.8	0	1	1	6.3e-45	1.3e-43	150.3	0	4	259	84	357	81	360	0.83	97.3384
	Phvul.005G073800.1	-	1054	Pkinase	PF00069.30	263	1.8e-43	149.8	0	1	1	1.3e-44	2.7e-43	149.3	0	2	257	774	1040	773	1043	0.84	97.3384
	Phvul.006G006700.1	-	618	Pkinase	PF00069.30	263	2.5e-43	149.4	0	1	1	1.9e-44	3.8e-43	148.8	0	3	258	320	587	318	590	0.86	97.3384
	Phvul.003G067900.1	-	393	Pkinase	PF00069.30	263	2.6e-43	149.3	0	1	1	2.2e-44	4.4e-43	148.6	0	4	259	82	357	79	359	0.84	97.3384
	Phvul.008G175200.1	-	609	Pkinase	PF00069.30	263	3.1e-43	149.1	0	1	1	2.7e-44	5.5e-43	148.3	0	4	259	307	571	305	574	0.89	97.3384
	Phvul.002G089100.1	-	410	Pkinase	PF00069.30	263	3.2e-43	149.1	0	1	1	2.6e-44	5.2e-43	148.3	0	4	259	78	353	75	355	0.84	97.3384
	Phvul.007G137800.1	-	1088	Pkinase	PF00069.30	263	3.4e-43	148.9	0	1	1	2.4e-44	5e-43	148.4	0	5	260	808	1079	804	1081	0.8	97.3384
	Phvul.001G076200.1	-	594	Pkinase	PF00069.30	263	5.3e-43	148.3	0	1	1	3.9e-44	8e-43	147.7	0	4	259	284	549	282	551	0.87	97.3384
	Phvul.002G184800.1	-	1132	Pkinase	PF00069.30	263	7e-43	147.9	0	1	1	5.3e-44	1.1e-42	147.3	0	3	258	837	1114	835	1117	0.78	97.3384
	Phvul.001G069216.1	-	368	Pkinase	PF00069.30	263	1.1e-42	147.3	0.1	1	1	9.4e-44	1.9e-42	146.5	0.1	4	259	61	312	59	314	0.85	97.3384
	Phvul.009G136200.1	-	1087	Pkinase	PF00069.30	263	1.3e-42	147	0	1	1	9.5e-44	1.9e-42	146.5	0	3	258	764	1034	762	1037	0.83	97.3384
	Phvul.001G069232.1	-	668	Pkinase	PF00069.30	263	1.4e-42	147	0	1	1	1.1e-43	2.2e-42	146.3	0	4	259	362	626	360	628	0.88	97.3384
	Phvul.006G198200.1	-	968	Pkinase	PF00069.30	263	1.5e-42	146.8	0	1	1	1.2e-43	2.5e-42	146.1	0	4	259	669	949	666	951	0.81	97.3384
	Phvul.005G162000.1	-	915	Pkinase	PF00069.30	263	1.7e-42	146.6	0.1	1	1	1.3e-43	2.7e-42	146	0.1	4	259	612	873	609	875	0.9	97.3384
	Phvul.001G070000.1	-	616	Pkinase	PF00069.30	263	1.8e-42	146.6	0	1	1	1.7e-43	3.4e-42	145.7	0	4	259	310	574	308	576	0.87	97.3384
	Phvul.008G174300.1	-	609	Pkinase	PF00069.30	263	2.1e-42	146.3	0	1	1	1.8e-43	3.7e-42	145.6	0	4	259	307	571	305	574	0.88	97.3384
	Phvul.011G161000.1	-	1052	Pkinase	PF00069.30	263	2.5e-42	146.1	0	1	1	1.8e-43	3.7e-42	145.5	0	2	257	769	1035	768	1038	0.83	97.3384
	Phvul.011G054300.1	-	919	Pkinase	PF00069.30	263	2.9e-42	145.9	0	1	1	2.5e-43	5.1e-42	145.1	0	2	257	522	790	521	794	0.87	97.3384
	Phvul.001G069600.1	-	603	Pkinase	PF00069.30	263	3.2e-42	145.7	0	1	1	2.6e-43	5.2e-42	145.1	0	4	259	297	561	295	563	0.88	97.3384
	Phvul.002G247100.1	-	379	Pkinase	PF00069.30	263	7e-42	144.6	0	1	1	4.6e-43	9.4e-42	144.2	0	4	259	74	347	71	349	0.79	97.3384
	Phvul.001G068500.1	-	612	Pkinase	PF00069.30	263	7.3e-42	144.6	0	1	1	6e-43	1.2e-41	143.9	0	4	259	306	570	304	572	0.88	97.3384
	Phvul.002G276900.1	-	595	Pkinase	PF00069.30	263	1e-41	144.1	0	1	1	7.5e-43	1.5e-41	143.5	0	3	258	275	543	273	546	0.83	97.3384
	Phvul.010G070400.1	-	982	Pkinase	PF00069.30	263	2e-41	143.1	0	1	1	1.4e-42	2.8e-41	142.7	0	3	258	699	965	697	968	0.85	97.3384
	Phvul.001G069264.1	-	573	Pkinase	PF00069.30	263	3.4e-41	142.4	0	1	1	2.7e-42	5.6e-41	141.7	0	4	259	267	531	265	534	0.88	97.3384
	Phvul.002G196200.1	-	1164	Pkinase	PF00069.30	263	3.7e-41	142.3	0	1	1	2.6e-42	5.3e-41	141.8	0	4	259	870	1153	867	1156	0.8	97.3384
	Phvul.003G130400.1	-	480	Pkinase	PF00069.30	263	4.9e-41	141.9	0	1	1	3.4e-42	6.9e-41	141.4	0	3	258	80	352	78	355	0.82	97.3384
	Phvul.001G071200.1	-	608	Pkinase	PF00069.30	263	1.1e-40	140.7	0	1	1	8.3e-42	1.7e-40	140.1	0	3	258	298	562	296	565	0.81	97.3384
	Phvul.008G028200.1	-	344	Pkinase	PF00069.30	263	1.2e-40	140.6	0.1	1	1	1e-41	2.1e-40	139.8	0	2	257	40	295	39	302	0.88	97.3384
	Phvul.009G133000.1	-	606	Pkinase	PF00069.30	263	1.8e-40	140	0	1	1	1.3e-41	2.6e-40	139.5	0	2	257	318	582	317	585	0.79	97.3384
	Phvul.002G215200.1	-	647	Pkinase	PF00069.30	263	1.4e-39	137.1	0	1	1	1e-40	2.1e-39	136.5	0	3	258	359	623	357	627	0.82	97.3384
	Phvul.008G122200.1	-	1153	Pkinase	PF00069.30	263	2e-39	136.6	0	1	1	1.6e-40	3.2e-39	135.9	0	4	259	813	1092	810	1094	0.88	97.3384
	Phvul.008G077600.1	-	845	Pkinase	PF00069.30	263	3.3e-39	135.9	0.4	1	1	2.4e-40	4.9e-39	135.3	0.4	2	257	529	787	528	791	0.78	97.3384
	Phvul.005G183300.1	-	945	Pkinase	PF00069.30	263	8.4e-39	134.6	0	1	1	5.9e-40	1.2e-38	134	0	2	257	629	910	628	914	0.84	97.3384
	Phvul.009G224500.1	-	545	Pkinase	PF00069.30	263	2.2e-37	129.9	0	1	1	1.5e-38	3.1e-37	129.4	0	5	260	263	535	259	537	0.84	97.3384
	Phvul.011G033000.3	-	664	Pkinase	PF00069.30	263	1.9e-36	126.8	0	1	1	1.3e-37	2.7e-36	126.3	0	4	259	362	626	360	628	0.83	97.3384
	Phvul.011G033000.4	-	664	Pkinase	PF00069.30	263	1.9e-36	126.8	0	1	1	1.3e-37	2.7e-36	126.3	0	4	259	362	626	360	628	0.83	97.3384
	Phvul.011G033000.2	-	669	Pkinase	PF00069.30	263	1.9e-36	126.8	0	1	1	1.4e-37	2.8e-36	126.3	0	4	259	367	631	365	633	0.83	97.3384
	Phvul.011G064000.1	-	422	Pkinase	PF00069.30	263	5.3e-36	125.4	0	1	1	4.2e-37	8.6e-36	124.7	0	4	259	82	371	79	373	0.79	97.3384
	Phvul.010G035800.1	-	609	Pkinase	PF00069.30	263	5.5e-36	125.3	0	1	1	3.9e-37	8e-36	124.8	0	3	258	302	571	300	573	0.86	97.3384
	Phvul.010G035800.2	-	609	Pkinase	PF00069.30	263	5.5e-36	125.3	0	1	1	3.9e-37	8e-36	124.8	0	3	258	302	571	300	573	0.86	97.3384
	Phvul.009G038000.1	-	523	Pkinase	PF00069.30	263	6e-36	125.2	0	1	1	4.5e-37	9.1e-36	124.6	0	3	258	47	322	45	325	0.81	97.3384
	Phvul.011G013100.1	-	503	Pkinase	PF00069.30	263	9.7e-36	124.5	0	1	1	7.2e-37	1.5e-35	123.9	0	3	258	57	331	55	333	0.87	97.3384
	Phvul.008G029500.1	-	343	Pkinase	PF00069.30	263	2.5e-33	116.6	0	1	1	2.5e-34	5.2e-33	115.6	0	2	257	45	308	44	313	0.86	97.3384
	Phvul.008G019200.2	-	405	Pkinase	PF00069.30	263	6.5e-32	112	0	1	1	5e-33	1e-31	111.3	0	4	259	127	397	124	399	0.77	97.3384
	Phvul.008G019200.1	-	406	Pkinase	PF00069.30	263	2.5e-31	110	0	1	1	2e-32	4e-31	109.4	0	4	259	127	398	124	400	0.77	97.3384
	Phvul.008G028500.1	-	347	Pkinase	PF00069.30	263	2.9e-31	109.9	0	1	1	2e-32	4.1e-31	109.4	0	2	257	48	304	47	311	0.85	97.3384
	Phvul.008G027100.1	-	346	Pkinase	PF00069.30	263	1.6e-30	107.4	0	1	1	1e-31	2.1e-30	107	0	2	257	40	301	39	305	0.82	97.3384
	Phvul.008G026900.1	-	357	Pkinase	PF00069.30	263	2.6e-30	106.7	0	1	1	1.7e-31	3.4e-30	106.3	0	2	257	40	302	39	309	0.83	97.3384
	Phvul.008G027300.1	-	341	Pkinase	PF00069.30	263	3.6e-30	106.2	0	1	1	2.3e-31	4.7e-30	105.9	0	2	257	40	298	39	303	0.81	97.3384
	Phvul.002G060200.1	-	683	Pkinase	PF00069.30	263	8.7e-29	101.7	0	1	1	5.8e-30	1.2e-28	101.3	0	4	259	414	674	411	678	0.87	97.3384
	Phvul.005G135500.4	-	345	Pkinase	PF00069.30	263	2e-27	97.3	0	1	1	1.3e-28	2.7e-27	96.8	0	3	258	57	313	55	315	0.83	97.3384
	Phvul.003G214800.1	-	681	Pkinase	PF00069.30	263	2.8e-27	96.8	0	1	1	1.9e-28	3.8e-27	96.3	0	4	259	411	671	408	675	0.86	97.3384
	Phvul.005G135500.1	-	473	Pkinase	PF00069.30	263	4.9e-27	96	0	1	1	3.3e-28	6.8e-27	95.5	0	3	258	185	441	183	443	0.83	97.3384
	Phvul.005G135500.2	-	473	Pkinase	PF00069.30	263	4.9e-27	96	0	1	1	3.3e-28	6.8e-27	95.5	0	3	258	185	441	183	443	0.83	97.3384
	Phvul.005G135500.3	-	473	Pkinase	PF00069.30	263	4.9e-27	96	0	1	1	3.3e-28	6.8e-27	95.5	0	3	258	185	441	183	443	0.83	97.3384
	Phvul.005G185800.1	-	694	Pkinase	PF00069.30	263	7.3e-26	92.1	0	1	1	5.8e-27	1.2e-25	91.5	0	5	260	397	663	394	664	0.84	97.3384
	Phvul.009G225700.1	-	605	Pkinase	PF00069.30	263	9.8e-26	91.7	0	1	1	7.6e-27	1.6e-25	91.1	0	4	259	333	598	331	600	0.83	97.3384
	Phvul.001G115100.1	-	781	Pkinase	PF00069.30	263	3.4e-19	70.3	0.1	1	1	2.7e-20	5.6e-19	69.6	0.1	3	258	479	747	477	752	0.82	97.3384
	Phvul.001G115100.2	-	781	Pkinase	PF00069.30	263	3.4e-19	70.3	0.1	1	1	2.7e-20	5.6e-19	69.6	0.1	3	258	479	747	477	752	0.82	97.3384
	Phvul.004G154500.1	-	635	Pkinase	PF00069.30	263	7.3e-78	262.6	0.2	2	2	6.2e-47	1.3e-45	156.9	0	5	259	354	619	351	621	0.86	96.9582
	Phvul.011G169500.1	-	343	Pkinase	PF00069.30	263	1.2e-64	219.2	0	1	1	7.5e-66	1.5e-64	218.9	0	9	263	47	321	40	321	0.93	96.9582
	Phvul.007G016500.2	-	495	Pkinase	PF00069.30	263	6.5e-61	207	0	1	1	5e-62	1e-60	206.4	0	4	258	219	462	216	465	0.94	96.9582
	Phvul.007G016500.3	-	543	Pkinase	PF00069.30	263	7.4e-61	206.8	0	1	1	6.2e-62	1.3e-60	206.1	0	4	258	267	510	264	513	0.94	96.9582
	Phvul.007G016500.1	-	583	Pkinase	PF00069.30	263	8.7e-61	206.6	0	1	1	7.4e-62	1.5e-60	205.8	0	4	258	307	550	304	553	0.94	96.9582
	Phvul.007G078800.2	-	536	Pkinase	PF00069.30	263	1.9e-59	202.2	0	1	1	1.4e-60	2.8e-59	201.7	0	3	257	274	516	272	520	0.93	96.9582
	Phvul.007G078800.1	-	553	Pkinase	PF00069.30	263	2e-59	202.1	0	1	1	1.5e-60	3e-59	201.6	0	3	257	291	533	289	537	0.93	96.9582
	Phvul.002G091900.1	-	422	Pkinase	PF00069.30	263	3.4e-58	198.1	0	1	1	2.2e-59	4.5e-58	197.7	0	5	259	150	402	146	404	0.9	96.9582
	Phvul.009G092900.1	-	814	Pkinase	PF00069.30	263	2.2e-52	179.1	0	1	1	1.7e-53	3.4e-52	178.4	0	5	259	494	758	491	760	0.87	96.9582
	Phvul.010G057300.1	-	813	Pkinase	PF00069.30	263	4.6e-52	178	0	1	1	3.5e-53	7.1e-52	177.4	0	4	258	520	797	518	801	0.87	96.9582
	Phvul.010G057500.1	-	806	Pkinase	PF00069.30	263	1.8e-51	176.1	0	1	1	1.3e-52	2.7e-51	175.5	0	4	258	518	795	516	799	0.85	96.9582
	Phvul.009G068300.1	-	809	Pkinase	PF00069.30	263	1.1e-50	173.5	0	1	1	8.3e-52	1.7e-50	172.9	0	5	259	518	788	515	790	0.88	96.9582
	Phvul.002G182900.2	-	369	Pkinase	PF00069.30	263	7.8e-50	170.7	0.1	1	1	4.9e-51	9.9e-50	170.4	0.1	3	257	23	287	21	290	0.82	96.9582
	Phvul.002G182900.1	-	406	Pkinase	PF00069.30	263	9.5e-50	170.4	0.1	1	1	6.5e-51	1.3e-49	170	0.1	3	257	60	324	58	327	0.82	96.9582
	Phvul.003G021700.1	-	407	Pkinase	PF00069.30	263	1.1e-48	167	0	1	1	7.4e-50	1.5e-48	166.5	0	2	256	53	317	52	321	0.81	96.9582
	Phvul.003G269700.1	-	398	Pkinase	PF00069.30	263	3.8e-48	165.2	0	1	1	2.8e-49	5.7e-48	164.6	0	5	259	87	363	83	365	0.82	96.9582
	Phvul.008G265800.1	-	379	Pkinase	PF00069.30	263	4.2e-48	165	0	1	1	2.9e-49	5.8e-48	164.6	0	3	257	80	348	78	352	0.83	96.9582
	Phvul.003G027600.2	-	547	Pkinase	PF00069.30	263	4.9e-48	164.8	0	1	1	3.6e-49	7.3e-48	164.3	0	5	259	203	465	200	468	0.88	96.9582
	Phvul.008G124200.1	-	430	Pkinase	PF00069.30	263	4.9e-48	164.8	0	1	1	3.4e-49	6.9e-48	164.3	0	3	257	87	355	85	361	0.84	96.9582
	Phvul.011G198500.3	-	519	Pkinase	PF00069.30	263	5.7e-48	164.6	0	1	1	4.2e-49	8.5e-48	164	0	5	259	196	460	193	462	0.84	96.9582
	Phvul.008G292000.2	-	416	Pkinase	PF00069.30	263	6.2e-48	164.5	0	1	1	4e-49	8.2e-48	164.1	0	6	260	100	371	95	373	0.83	96.9582
	Phvul.011G007200.1	-	1020	Pkinase	PF00069.30	263	7.2e-48	164.3	0	1	1	5.7e-49	1.2e-47	163.6	0	4	258	708	977	706	979	0.83	96.9582
	Phvul.003G027600.1	-	671	Pkinase	PF00069.30	263	7.4e-48	164.2	0	1	1	5.8e-49	1.2e-47	163.6	0	5	259	327	589	324	592	0.88	96.9582
	Phvul.011G198500.2	-	638	Pkinase	PF00069.30	263	9.1e-48	163.9	0	1	1	6.9e-49	1.4e-47	163.3	0	5	259	315	579	312	581	0.84	96.9582
	Phvul.002G046500.2	-	788	Pkinase	PF00069.30	263	9.9e-48	163.8	0	1	1	7.6e-49	1.5e-47	163.2	0	5	259	488	758	485	760	0.82	96.9582
	Phvul.001G075600.1	-	698	Pkinase	PF00069.30	263	9.9e-48	163.8	0.1	1	1	7e-49	1.4e-47	163.3	0.1	5	259	397	661	394	663	0.84	96.9582
	Phvul.011G198500.1	-	710	Pkinase	PF00069.30	263	1.1e-47	163.6	0	1	1	8.7e-49	1.8e-47	163	0	5	259	387	651	384	653	0.84	96.9582
	Phvul.011G197500.1	-	712	Pkinase	PF00069.30	263	1.5e-47	163.2	0.1	1	1	1.2e-48	2.4e-47	162.5	0.1	5	259	382	646	379	648	0.83	96.9582
	Phvul.002G318300.1	-	666	Pkinase	PF00069.30	263	1.9e-47	162.9	0	1	1	1.5e-48	3.1e-47	162.2	0	4	258	352	624	350	628	0.84	96.9582
	Phvul.001G069500.1	-	339	Pkinase	PF00069.30	263	2.2e-47	162.7	0.1	1	1	1.4e-48	2.9e-47	162.3	0.1	5	259	19	283	16	285	0.87	96.9582
	Phvul.011G200400.1	-	714	Pkinase	PF00069.30	263	3.4e-47	162.1	0	1	1	2.6e-48	5.2e-47	161.5	0	5	259	391	655	388	657	0.83	96.9582
	Phvul.008G058700.2	-	643	Pkinase	PF00069.30	263	5.3e-47	161.4	0	1	1	4.4e-48	8.9e-47	160.7	0	2	256	314	578	313	582	0.81	96.9582
	Phvul.011G197700.2	-	697	Pkinase	PF00069.30	263	5.3e-47	161.4	0	1	1	4.2e-48	8.6e-47	160.7	0	5	259	374	638	371	640	0.83	96.9582
	Phvul.011G197700.1	-	705	Pkinase	PF00069.30	263	5.4e-47	161.4	0	1	1	4.3e-48	8.8e-47	160.7	0	5	259	382	646	379	648	0.83	96.9582
	Phvul.008G058700.1	-	669	Pkinase	PF00069.30	263	5.8e-47	161.3	0	1	1	4.8e-48	9.7e-47	160.6	0	2	256	340	604	339	608	0.81	96.9582
	Phvul.008G115500.1	-	655	Pkinase	PF00069.30	263	8e-47	160.8	0	1	1	9.8e-48	2e-46	159.5	0	4	258	366	638	363	642	0.85	96.9582
	Phvul.002G049400.2	-	667	Pkinase	PF00069.30	263	9.2e-47	160.6	0	1	1	7.8e-48	1.6e-46	159.9	0	3	257	354	619	352	621	0.85	96.9582
	Phvul.001G048500.1	-	459	Pkinase	PF00069.30	263	1.3e-46	160.2	0	1	1	8.8e-48	1.8e-46	159.7	0	5	259	163	426	160	428	0.82	96.9582
	Phvul.008G292000.1	-	426	Pkinase	PF00069.30	263	1.4e-46	160.1	0	1	1	9.4e-48	1.9e-46	159.6	0	6	260	100	381	95	383	0.84	96.9582
	Phvul.009G239600.1	-	374	Pkinase	PF00069.30	263	1.4e-46	160	0	1	1	1.1e-47	2.3e-46	159.3	0	5	259	23	287	20	289	0.86	96.9582
	Phvul.001G044900.3	-	386	Pkinase	PF00069.30	263	2e-46	159.5	0	1	1	1.3e-47	2.7e-46	159.1	0	5	259	85	356	81	358	0.84	96.9582
	Phvul.001G044900.4	-	386	Pkinase	PF00069.30	263	2e-46	159.5	0	1	1	1.3e-47	2.7e-46	159.1	0	5	259	85	356	81	358	0.84	96.9582
	Phvul.001G044900.5	-	386	Pkinase	PF00069.30	263	2e-46	159.5	0	1	1	1.3e-47	2.7e-46	159.1	0	5	259	85	356	81	358	0.84	96.9582
	Phvul.007G050300.2	-	352	Pkinase	PF00069.30	263	2.2e-46	159.4	0	1	1	1.4e-47	2.9e-46	159	0	3	257	45	309	43	312	0.84	96.9582
	Phvul.008G264400.2	-	932	Pkinase	PF00069.30	263	2.3e-46	159.3	0	1	1	1.7e-47	3.5e-46	158.8	0	4	258	588	854	585	857	0.8	96.9582
	Phvul.010G010300.1	-	413	Pkinase	PF00069.30	263	2.4e-46	159.3	0	1	1	1.8e-47	3.6e-46	158.7	0	4	258	76	352	73	355	0.8	96.9582
	Phvul.008G264400.1	-	1027	Pkinase	PF00069.30	263	2.8e-46	159.1	0	1	1	2e-47	4.1e-46	158.5	0	4	258	683	949	680	952	0.8	96.9582
	Phvul.002G017700.1	-	503	Pkinase	PF00069.30	263	3.6e-46	158.7	0	1	1	2.3e-47	4.8e-46	158.3	0	4	258	175	440	172	443	0.82	96.9582
	Phvul.004G155000.1	-	556	Pkinase	PF00069.30	263	3.9e-46	158.6	0	1	1	2.9e-47	5.9e-46	158	0	4	258	259	526	257	529	0.83	96.9582
	Phvul.011G123500.1	-	989	Pkinase	PF00069.30	263	4.9e-46	158.3	0	1	1	3.3e-47	6.7e-46	157.8	0	4	258	686	955	683	958	0.84	96.9582
	Phvul.009G209700.1	-	1383	Pkinase	PF00069.30	263	5.4e-46	158.1	0	1	1	4.2e-47	8.5e-46	157.5	0	4	258	1096	1353	1093	1355	0.89	96.9582
	Phvul.009G209700.2	-	1389	Pkinase	PF00069.30	263	5.4e-46	158.1	0	1	1	4.2e-47	8.6e-46	157.5	0	4	258	1102	1359	1099	1361	0.89	96.9582
	Phvul.007G048700.1	-	666	Pkinase	PF00069.30	263	5.6e-46	158.1	0	1	1	4.2e-47	8.5e-46	157.5	0	3	257	336	600	334	603	0.8	96.9582
	Phvul.004G126100.1	-	989	Pkinase	PF00069.30	263	7.4e-46	157.7	0	1	1	5.3e-47	1.1e-45	157.1	0	4	258	663	923	660	925	0.87	96.9582
	Phvul.002G049500.1	-	680	Pkinase	PF00069.30	263	7.9e-46	157.6	0	1	1	5.6e-47	1.1e-45	157.1	0	3	257	357	622	355	625	0.8	96.9582
	Phvul.004G027300.1	-	466	Pkinase	PF00069.30	263	9.6e-46	157.3	0	1	1	8.9e-47	1.8e-45	156.4	0	5	259	111	386	107	388	0.79	96.9582
	Phvul.006G108400.2	-	389	Pkinase	PF00069.30	263	9.9e-46	157.3	0	1	1	6.2e-47	1.3e-45	156.9	0	4	258	73	341	70	346	0.85	96.9582
	Phvul.005G100400.1	-	999	Pkinase	PF00069.30	263	1.1e-45	157.2	0	1	1	7.3e-47	1.5e-45	156.7	0	4	258	694	963	691	966	0.81	96.9582
	Phvul.001G165100.1	-	1020	Pkinase	PF00069.30	263	2e-45	156.3	0	1	1	1.4e-46	2.8e-45	155.8	0	3	257	714	984	712	988	0.81	96.9582
	Phvul.003G060600.1	-	547	Pkinase	PF00069.30	263	2.1e-45	156.2	0	1	1	1.4e-46	2.9e-45	155.7	0	3	257	198	465	196	468	0.79	96.9582
	Phvul.008G059400.1	-	493	Pkinase	PF00069.30	263	2.7e-45	155.8	0	1	1	2e-46	4.2e-45	155.2	0	5	259	169	434	167	437	0.81	96.9582
	Phvul.001G195500.1	-	942	Pkinase	PF00069.30	263	2.9e-45	155.8	0	1	1	1.9e-46	3.9e-45	155.3	0	4	258	599	869	596	872	0.81	96.9582
	Phvul.010G082400.1	-	786	Pkinase	PF00069.30	263	2.9e-45	155.7	0	1	1	1.9e-46	3.9e-45	155.3	0	5	259	501	761	497	765	0.85	96.9582
	Phvul.009G244600.1	-	1193	Pkinase	PF00069.30	263	3.1e-45	155.6	0	1	1	2.3e-46	4.6e-45	155.1	0	6	260	895	1172	890	1174	0.82	96.9582
	Phvul.007G030000.1	-	620	Pkinase	PF00069.30	263	3.7e-45	155.4	0	1	1	2.9e-46	5.8e-45	154.7	0	5	259	308	577	305	579	0.81	96.9582
	Phvul.006G194700.1	-	829	Pkinase	PF00069.30	263	4.6e-45	155.1	0	1	1	3.2e-46	6.5e-45	154.6	0	3	257	513	778	511	781	0.83	96.9582
	Phvul.007G050700.1	-	659	Pkinase	PF00069.30	263	5.2e-45	154.9	0	1	1	4.4e-46	8.9e-45	154.1	0	2	256	331	595	330	599	0.79	96.9582
	Phvul.003G154000.1	-	977	Pkinase	PF00069.30	263	5.9e-45	154.7	0	1	1	4.5e-46	9.2e-45	154.1	0	5	259	669	950	665	953	0.83	96.9582
	Phvul.001G039300.1	-	454	Pkinase	PF00069.30	263	5.9e-45	154.7	0	1	1	4.3e-46	8.8e-45	154.1	0	3	257	178	441	176	445	0.83	96.9582
	Phvul.010G031900.1	-	812	Pkinase	PF00069.30	263	9.8e-45	154	0	1	1	8e-46	1.6e-44	153.3	0	5	259	523	788	520	790	0.82	96.9582
	Phvul.008G000200.2	-	823	Pkinase	PF00069.30	263	1.1e-44	153.8	0	1	1	9.6e-46	2e-44	153	0	6	260	494	762	489	764	0.81	96.9582
	Phvul.002G220200.1	-	843	Pkinase	PF00069.30	263	1.1e-44	153.8	0.1	1	1	7.9e-46	1.6e-44	153.3	0.1	2	256	525	790	524	794	0.77	96.9582
	Phvul.011G147000.1	-	830	Pkinase	PF00069.30	263	1.5e-44	153.4	0	1	1	1.1e-45	2.3e-44	152.8	0	2	256	516	781	515	785	0.78	96.9582
	Phvul.008G047800.1	-	1063	Pkinase	PF00069.30	263	3.7e-44	152.1	0	1	1	2.8e-45	5.7e-44	151.5	0	4	258	774	1040	771	1042	0.84	96.9582
	Phvul.009G198800.1	-	450	Pkinase	PF00069.30	263	4.3e-44	151.9	0	1	1	3e-45	6.1e-44	151.4	0	5	259	107	385	105	387	0.86	96.9582
	Phvul.007G063200.2	-	944	Pkinase	PF00069.30	263	4.4e-44	151.9	0	1	1	3.1e-45	6.4e-44	151.3	0	4	258	620	879	617	882	0.86	96.9582
	Phvul.007G063200.1	-	989	Pkinase	PF00069.30	263	4.8e-44	151.8	0	1	1	3.4e-45	7e-44	151.2	0	4	258	665	924	662	927	0.86	96.9582
	Phvul.003G161500.1	-	445	Pkinase	PF00069.30	263	5.7e-44	151.5	0	1	1	4e-45	8.1e-44	151	0	5	259	107	384	104	386	0.86	96.9582
	Phvul.004G155300.1	-	520	Pkinase	PF00069.30	263	6.8e-44	151.2	0	1	1	5.5e-45	1.1e-43	150.5	0	4	258	223	490	221	493	0.83	96.9582
	Phvul.009G082532.1	-	386	Pkinase	PF00069.30	263	7.5e-44	151.1	0	1	1	4.9e-45	1e-43	150.7	0	4	258	56	316	53	318	0.86	96.9582
	Phvul.006G127900.1	-	848	Pkinase	PF00069.30	263	1.3e-43	150.3	0	1	1	1.1e-44	2.3e-43	149.5	0	6	260	528	792	523	795	0.83	96.9582
	Phvul.001G038400.1	-	979	Pkinase	PF00069.30	263	2.2e-43	149.6	0	1	1	1.5e-44	3.1e-43	149.1	0	4	258	649	909	646	911	0.86	96.9582
	Phvul.003G024000.1	-	736	Pkinase	PF00069.30	263	2.4e-43	149.5	0	1	1	1.5e-44	3.1e-43	149.1	0	3	257	411	678	409	681	0.78	96.9582
	Phvul.005G153100.1	-	906	Pkinase	PF00069.30	263	4.7e-43	148.5	0	1	1	3.4e-44	7e-43	147.9	0	2	256	514	780	513	785	0.85	96.9582
	Phvul.005G133700.1	-	600	Pkinase	PF00069.30	263	8.4e-43	147.7	0	1	1	5.8e-44	1.2e-42	147.2	0	5	259	219	492	215	494	0.89	96.9582
	Phvul.006G033300.1	-	346	Pkinase	PF00069.30	263	1.1e-42	147.3	0	1	1	1.1e-43	2.3e-42	146.2	0	4	258	85	324	83	326	0.87	96.9582
	Phvul.008G159500.1	-	1086	Pkinase	PF00069.30	263	4.2e-42	145.4	0	1	1	3.1e-43	6.2e-42	144.8	0	4	258	761	1030	758	1033	0.86	96.9582
	Phvul.003G267000.1	-	434	Pkinase	PF00069.30	263	8.5e-42	144.4	0	1	1	5.9e-43	1.2e-41	143.9	0	5	259	75	344	71	346	0.85	96.9582
	Phvul.005G162400.1	-	883	Pkinase	PF00069.30	263	5.6e-41	141.7	0	1	1	5e-42	1e-40	140.8	0	4	258	577	840	575	843	0.89	96.9582
	Phvul.002G304500.1	-	676	Pkinase	PF00069.30	263	1.1e-40	140.7	0	1	1	9.5e-42	1.9e-40	139.9	0	5	259	404	668	400	670	0.81	96.9582
	Phvul.006G217700.1	-	374	Pkinase	PF00069.30	263	8.7e-39	134.5	0	1	1	6.2e-40	1.3e-38	134	0	4	258	19	286	16	289	0.85	96.9582
	Phvul.004G149100.1	-	673	Pkinase	PF00069.30	263	5.7e-38	131.8	0	1	1	4.1e-39	8.4e-38	131.3	0	5	259	380	640	377	642	0.81	96.9582
	Phvul.005G063700.1	-	674	Pkinase	PF00069.30	263	6.6e-38	131.6	0	1	1	6e-39	1.2e-37	130.7	0	3	257	29	289	27	292	0.86	96.9582
	Phvul.005G063700.2	-	673	Pkinase	PF00069.30	263	6.6e-38	131.6	0	1	1	6e-39	1.2e-37	130.7	0	3	257	29	289	27	292	0.86	96.9582
	Phvul.002G331400.1	-	658	Pkinase	PF00069.30	263	1.2e-37	130.7	0	1	1	9.1e-39	1.9e-37	130.1	0	5	259	369	629	366	631	0.84	96.9582
	Phvul.003G029700.1	-	627	Pkinase	PF00069.30	263	7.5e-37	128.2	0	1	1	5.6e-38	1.1e-36	127.5	0	5	259	336	594	333	596	0.83	96.9582
	Phvul.006G059284.1	-	1090	Pkinase	PF00069.30	263	1.8e-36	126.9	0	1	1	1.3e-37	2.6e-36	126.4	0	4	258	768	1037	765	1040	0.81	96.9582
	Phvul.003G288300.1	-	479	Pkinase	PF00069.30	263	3e-36	126.2	0	1	1	2e-37	4.1e-36	125.7	0	4	258	168	429	165	431	0.79	96.9582
	Phvul.003G159700.1	-	645	Pkinase	PF00069.30	263	2.1e-35	123.4	0	1	1	1.6e-36	3.3e-35	122.8	0	5	259	343	603	340	605	0.84	96.9582
	Phvul.007G224300.1	-	682	Pkinase	PF00069.30	263	9.5e-35	121.3	0	1	1	7.3e-36	1.5e-34	120.6	0	5	259	374	647	371	649	0.83	96.9582
	Phvul.002G162400.1	-	590	Pkinase	PF00069.30	263	1.6e-34	120.6	0	1	1	1.2e-35	2.5e-34	119.9	0	5	259	292	554	289	556	0.85	96.9582
	Phvul.002G295600.1	-	637	Pkinase	PF00069.30	263	1.7e-34	120.4	0	1	1	1.2e-35	2.5e-34	119.9	0	5	259	330	592	327	594	0.85	96.9582
	Phvul.008G080500.1	-	607	Pkinase	PF00069.30	263	7.7e-34	118.3	0	1	1	5.7e-35	1.2e-33	117.7	0	5	259	336	597	333	599	0.82	96.9582
	Phvul.008G179300.1	-	415	Pkinase	PF00069.30	263	1.1e-33	117.8	0	1	1	8.9e-35	1.8e-33	117.1	0	4	258	53	308	50	311	0.83	96.9582
	Phvul.008G160700.1	-	623	Pkinase	PF00069.30	263	1.1e-33	117.7	0	1	1	9.1e-35	1.9e-33	117	0	5	259	326	584	323	586	0.86	96.9582
	Phvul.008G160700.2	-	623	Pkinase	PF00069.30	263	1.1e-33	117.7	0	1	1	9.1e-35	1.9e-33	117	0	5	259	326	584	323	586	0.86	96.9582
	Phvul.004G136100.1	-	617	Pkinase	PF00069.30	263	1.2e-33	117.7	0.2	1	1	8.8e-35	1.8e-33	117.1	0.2	5	259	336	604	333	606	0.84	96.9582
	Phvul.007G029900.1	-	667	Pkinase	PF00069.30	263	3.8e-33	116	0	1	1	2.8e-34	5.7e-33	115.4	0	5	259	365	632	362	634	0.85	96.9582
	Phvul.001G185400.1	-	677	Pkinase	PF00069.30	263	1.6e-32	114	0	1	1	1.2e-33	2.5e-32	113.3	0	5	259	368	640	365	642	0.82	96.9582
	Phvul.009G195900.1	-	855	Pkinase	PF00069.30	263	5.5e-31	108.9	0	1	1	2.8e-31	5.7e-30	105.6	0	4	258	550	844	547	846	0.82	96.9582
	Phvul.003G156366.1	-	855	Pkinase	PF00069.30	263	3.3e-30	106.4	0	1	1	1.1e-30	2.2e-29	103.7	0	4	258	552	844	549	846	0.82	96.9582
	Phvul.011G181900.1	-	353	Pkinase	PF00069.30	263	3.5e-30	106.3	0	1	1	2.6e-31	5.3e-30	105.7	0	5	259	72	346	69	348	0.86	96.9582
	Phvul.003G241400.1	-	634	Pkinase	PF00069.30	263	4.1e-30	106.1	0	1	1	3.1e-31	6.3e-30	105.5	0	5	259	364	614	361	616	0.88	96.9582
	Phvul.004G177900.1	-	641	Pkinase	PF00069.30	263	4.8e-30	105.8	0	1	1	3.6e-31	7.4e-30	105.2	0	5	259	340	603	337	606	0.87	96.9582
	Phvul.009G067200.1	-	660	Pkinase	PF00069.30	263	3.3e-28	99.8	0	1	1	2.7e-29	5.5e-28	99.1	0	5	259	382	634	379	636	0.88	96.9582
	Phvul.006G207000.1	-	396	Pkinase	PF00069.30	263	1.2e-27	98	0	1	1	8.9e-29	1.8e-27	97.4	0	5	259	93	357	90	359	0.83	96.9582
	Phvul.009G092300.1	-	620	Pkinase	PF00069.30	263	8.3e-27	95.2	0	1	1	6.4e-28	1.3e-26	94.6	0	4	258	46	304	43	306	0.89	96.9582
	Phvul.009G092300.2	-	620	Pkinase	PF00069.30	263	8.3e-27	95.2	0	1	1	6.4e-28	1.3e-26	94.6	0	4	258	46	304	43	306	0.89	96.9582
	Phvul.002G232700.1	-	332	Pkinase	PF00069.30	263	7.6e-26	92.1	0	1	1	5.5e-27	1.1e-25	91.5	0	2	256	63	318	62	322	0.78	96.9582
	Phvul.001G050700.1	-	632	Pkinase	PF00069.30	263	1.8e-22	81	0	1	1	1.4e-23	2.8e-22	80.4	0	4	258	48	307	45	310	0.86	96.9582
	Phvul.008G154200.1	-	661	Pkinase	PF00069.30	263	2.1e-22	80.8	0	1	1	1.5e-23	3e-22	80.3	0	3	257	397	653	395	656	0.83	96.9582
	Phvul.001G245300.1	-	643	Pkinase	PF00069.30	263	3.8e-20	73.4	0	1	1	2.1e-20	4.3e-19	69.9	0	5	259	357	610	354	612	0.79	96.9582
	Phvul.004G055400.1	-	760	Pkinase	PF00069.30	263	1e-17	65.4	0	1	1	2.6e-18	5.4e-17	63.1	0	4	258	481	740	478	743	0.74	96.9582
	Phvul.008G002500.1	-	675	Pkinase	PF00069.30	263	1.1e-17	65.3	0	1	1	8.9e-19	1.8e-17	64.6	0	1	255	113	403	113	409	0.8	96.9582
	Phvul.004G154600.1	-	627	Pkinase	PF00069.30	263	1e-80	272	0.5	2	2	2.1e-47	4.4e-46	158.4	0	6	259	347	611	343	613	0.88	96.5779
	Phvul.007G184600.1	-	967	Pkinase	PF00069.30	263	3.6e-53	181.6	0	1	1	2.9e-54	5.8e-53	181	0	4	257	689	934	687	937	0.93	96.5779
	Phvul.004G043800.1	-	425	Pkinase	PF00069.30	263	9.3e-53	180.3	0	1	1	7.2e-54	1.5e-52	179.6	0	5	258	121	373	118	376	0.92	96.5779
	Phvul.004G043800.4	-	423	Pkinase	PF00069.30	263	1.3e-52	179.8	0.1	1	1	1e-53	2.1e-52	179.2	0.1	5	258	121	371	118	374	0.92	96.5779
	Phvul.010G057000.1	-	827	Pkinase	PF00069.30	263	1.6e-52	179.6	0	1	1	1.2e-53	2.4e-52	178.9	0	4	257	534	810	532	815	0.83	96.5779
	Phvul.001G130800.2	-	729	Pkinase	PF00069.30	263	3.4e-52	178.4	0.1	1	1	2.5e-53	5e-52	177.9	0.1	5	258	403	666	399	678	0.9	96.5779
	Phvul.007G082500.1	-	369	Pkinase	PF00069.30	263	1.9e-49	169.5	0	1	1	1.2e-50	2.4e-49	169.1	0	6	259	90	356	85	358	0.83	96.5779
	Phvul.011G008100.1	-	941	Pkinase	PF00069.30	263	4.6e-49	168.2	0	1	1	3.2e-50	6.6e-49	167.7	0	6	259	670	932	665	935	0.87	96.5779
	Phvul.011G063900.1	-	439	Pkinase	PF00069.30	263	2.2e-48	165.9	0	1	1	1.8e-49	3.6e-48	165.3	0	6	259	90	358	85	362	0.84	96.5779
	Phvul.007G050200.1	-	643	Pkinase	PF00069.30	263	1.2e-47	163.5	0	1	1	9.2e-49	1.9e-47	162.9	0	3	256	330	592	328	598	0.85	96.5779
	Phvul.009G239500.1	-	413	Pkinase	PF00069.30	263	2.4e-47	162.6	0	1	1	2e-48	4e-47	161.8	0	5	258	78	342	75	345	0.86	96.5779
	Phvul.011G167800.1	-	1005	Pkinase	PF00069.30	263	3.4e-47	162.1	0	1	1	2.6e-48	5.3e-47	161.4	0	4	257	662	926	659	930	0.79	96.5779
	Phvul.009G011600.1	-	375	Pkinase	PF00069.30	263	8.1e-47	160.8	0	1	1	6.3e-48	1.3e-46	160.2	0	2	255	73	339	72	348	0.83	96.5779
	Phvul.005G088800.1	-	736	Pkinase	PF00069.30	263	1.7e-46	159.8	0	1	1	1.2e-47	2.5e-46	159.2	0	2	255	421	685	420	690	0.82	96.5779
	Phvul.005G015100.1	-	660	Pkinase	PF00069.30	263	2e-46	159.5	0	1	1	1.6e-47	3.3e-46	158.8	0	3	256	344	608	342	612	0.79	96.5779
	Phvul.008G077200.1	-	434	Pkinase	PF00069.30	263	2.3e-46	159.4	0	1	1	1.5e-47	3.1e-46	158.9	0	6	259	94	364	89	366	0.8	96.5779
	Phvul.010G018900.2	-	823	Pkinase	PF00069.30	263	3.5e-46	158.7	0	1	1	2.5e-47	5e-46	158.2	0	2	255	506	771	505	777	0.82	96.5779
	Phvul.010G018900.1	-	825	Pkinase	PF00069.30	263	3.5e-46	158.7	0	1	1	2.5e-47	5e-46	158.2	0	2	255	508	773	507	779	0.82	96.5779
	Phvul.001G076100.1	-	699	Pkinase	PF00069.30	263	4.5e-46	158.4	0	1	1	3.4e-47	6.9e-46	157.8	0	6	259	391	654	388	656	0.83	96.5779
	Phvul.003G137700.3	-	353	Pkinase	PF00069.30	263	5.1e-46	158.2	0	1	1	3.3e-47	6.7e-46	157.8	0	4	257	41	305	38	310	0.77	96.5779
	Phvul.002G220000.1	-	835	Pkinase	PF00069.30	263	1.3e-45	156.9	0	1	1	9.5e-47	1.9e-45	156.3	0	4	257	522	786	519	789	0.83	96.5779
	Phvul.002G302300.1	-	379	Pkinase	PF00069.30	263	1.3e-45	156.8	0	1	1	8.5e-47	1.7e-45	156.5	0	6	259	70	340	65	342	0.84	96.5779
	Phvul.007G153400.1	-	1019	Pkinase	PF00069.30	263	1.7e-44	153.2	0	1	1	1.2e-45	2.4e-44	152.7	0	4	257	711	980	708	983	0.8	96.5779
	Phvul.003G101800.1	-	335	Pkinase	PF00069.30	263	3e-44	152.4	0	1	1	1.9e-45	3.9e-44	152	0	6	259	24	290	19	293	0.86	96.5779
	Phvul.005G103300.1	-	688	Pkinase	PF00069.30	263	3.3e-44	152.3	0	1	1	2.3e-45	4.7e-44	151.8	0	6	259	351	613	346	615	0.85	96.5779
	Phvul.007G030100.1	-	572	Pkinase	PF00069.30	263	3.3e-44	152.3	0	1	1	2.7e-45	5.5e-44	151.5	0	5	258	272	539	270	542	0.74	96.5779
	Phvul.005G088200.1	-	817	Pkinase	PF00069.30	263	4.8e-44	151.7	0	1	1	4.8e-45	9.9e-44	150.7	0	4	257	506	767	503	770	0.82	96.5779
	Phvul.011G166400.1	-	1043	Pkinase	PF00069.30	263	6e-44	151.4	0	1	1	4.2e-45	8.5e-44	150.9	0	4	257	773	1042	770	1043	0.82	96.5779
	Phvul.008G146000.1	-	951	Pkinase	PF00069.30	263	1.1e-43	150.5	0	1	1	8.5e-45	1.7e-43	149.9	0	4	257	666	932	663	937	0.83	96.5779
	Phvul.001G243800.1	-	806	Pkinase	PF00069.30	263	1.2e-43	150.4	0	1	1	8.6e-45	1.8e-43	149.9	0	4	257	500	778	497	781	0.83	96.5779
	Phvul.002G124700.1	-	419	Pkinase	PF00069.30	263	4.1e-43	148.7	0	1	1	2.9e-44	5.8e-43	148.2	0	6	259	95	364	90	366	0.82	96.5779
	Phvul.008G045200.1	-	741	Pkinase	PF00069.30	263	6.1e-43	148.1	0	1	1	4.1e-44	8.3e-43	147.7	0	5	258	447	707	443	711	0.84	96.5779
	Phvul.009G079300.3	-	695	Pkinase	PF00069.30	263	9.9e-43	147.4	0	1	1	8.3e-44	1.7e-42	146.7	0	2	255	386	642	385	647	0.89	96.5779
	Phvul.009G079300.1	-	718	Pkinase	PF00069.30	263	1.1e-42	147.3	0	1	1	8.9e-44	1.8e-42	146.6	0	2	255	409	665	408	670	0.89	96.5779
	Phvul.003G040200.1	-	1131	Pkinase	PF00069.30	263	1.9e-42	146.5	0	1	1	1.3e-43	2.7e-42	146	0	5	258	788	1059	784	1062	0.89	96.5779
	Phvul.005G184700.1	-	1084	Pkinase	PF00069.30	263	2.7e-42	146	0	1	1	2.1e-43	4.3e-42	145.3	0	6	259	799	1069	794	1079	0.79	96.5779
	Phvul.005G013100.1	-	362	Pkinase	PF00069.30	263	2.8e-42	145.9	0.7	1	1	2e-43	4.1e-42	145.4	0	6	259	62	317	57	319	0.87	96.5779
	Phvul.009G171200.1	-	626	Pkinase	PF00069.30	263	4.8e-42	145.2	0	1	1	3.3e-43	6.8e-42	144.7	0	4	257	335	617	332	621	0.79	96.5779
	Phvul.003G038700.1	-	794	Pkinase	PF00069.30	263	6.8e-42	144.7	0	1	1	5.3e-43	1.1e-41	144	0	6	259	517	784	512	786	0.82	96.5779
	Phvul.003G203100.1	-	1114	Pkinase	PF00069.30	263	8.1e-41	141.2	0	1	1	5.5e-42	1.1e-40	140.7	0	4	257	777	1045	774	1048	0.85	96.5779
	Phvul.010G143100.3	-	566	Pkinase	PF00069.30	263	1e-40	140.9	0	1	1	7.1e-42	1.4e-40	140.3	0	4	257	269	529	266	533	0.86	96.5779
	Phvul.010G143100.2	-	648	Pkinase	PF00069.30	263	1.2e-40	140.6	0	1	1	9.7e-42	2e-40	139.9	0	4	257	351	611	348	615	0.86	96.5779
	Phvul.005G160700.1	-	697	Pkinase	PF00069.30	263	1.7e-40	140.1	0	1	1	2.1e-41	4.3e-40	138.8	0	5	258	408	671	404	673	0.82	96.5779
	Phvul.010G143100.4	-	840	Pkinase	PF00069.30	263	2.3e-40	139.7	0	1	1	1.7e-41	3.4e-40	139.1	0	4	257	543	803	540	807	0.86	96.5779
	Phvul.001G018000.2	-	733	Pkinase	PF00069.30	263	5.5e-40	138.4	0	1	1	8.6e-41	1.8e-39	136.8	0	5	258	415	686	411	688	0.84	96.5779
	Phvul.010G140200.1	-	750	Pkinase	PF00069.30	263	7.5e-40	138	0	1	1	6.9e-41	1.4e-39	137.1	0	5	258	407	670	403	672	0.83	96.5779
	Phvul.008G245900.1	-	655	Pkinase	PF00069.30	263	5.8e-38	131.8	0	1	1	4.3e-39	8.7e-38	131.2	0	5	258	363	624	360	627	0.85	96.5779
	Phvul.008G245900.2	-	655	Pkinase	PF00069.30	263	5.8e-38	131.8	0	1	1	4.3e-39	8.7e-38	131.2	0	5	258	363	624	360	627	0.85	96.5779
	Phvul.006G080200.1	-	657	Pkinase	PF00069.30	263	5.1e-37	128.7	0	1	1	4.1e-38	8.5e-37	128	0	5	258	366	627	363	649	0.85	96.5779
	Phvul.009G079300.4	-	672	Pkinase	PF00069.30	263	9.5e-35	121.3	0	1	1	6.6e-35	1.4e-33	117.5	0	2	255	386	619	385	624	0.87	96.5779
	Phvul.009G079300.2	-	695	Pkinase	PF00069.30	263	1e-34	121.1	0	1	1	7.1e-35	1.4e-33	117.4	0	2	255	409	642	408	647	0.87	96.5779
	Phvul.008G028300.1	-	348	Pkinase	PF00069.30	263	1.1e-32	114.5	0	1	1	7.6e-34	1.5e-32	114	0	2	255	48	302	47	312	0.86	96.5779
	Phvul.008G186900.1	-	644	Pkinase	PF00069.30	263	5.2e-32	112.3	0	1	1	3.7e-33	7.6e-32	111.7	0	5	258	355	617	352	620	0.81	96.5779
	Phvul.008G186900.2	-	644	Pkinase	PF00069.30	263	5.2e-32	112.3	0	1	1	3.7e-33	7.6e-32	111.7	0	5	258	355	617	352	620	0.81	96.5779
	Phvul.001G083100.1	-	377	Pkinase	PF00069.30	263	3.4e-30	106.3	0	1	1	2.2e-31	4.5e-30	106	0	2	255	77	339	76	344	0.82	96.5779
	Phvul.010G127500.1	-	741	Pkinase	PF00069.30	263	1.5e-29	104.2	0	1	1	1.1e-30	2.3e-29	103.6	0	5	258	414	677	411	680	0.77	96.5779
	Phvul.002G302600.1	-	619	Pkinase	PF00069.30	263	6.4e-27	95.6	0	1	1	4.5e-28	9.2e-27	95.1	0	5	258	334	598	331	602	0.8	96.5779
	Phvul.003G129400.1	-	608	Pkinase	PF00069.30	263	3.6e-26	93.1	0	1	1	2.6e-27	5.3e-26	92.6	0	5	258	336	600	333	603	0.8	96.5779
	Phvul.008G221900.1	-	631	Pkinase	PF00069.30	263	1.4e-17	65	0	1	1	2.2e-17	4.5e-16	60.1	0	5	258	350	600	347	603	0.72	96.5779
	Phvul.002G156600.1	-	663	Pkinase	PF00069.30	263	4.3e-17	63.4	0	1	1	4.1e-18	8.3e-17	62.4	0	5	258	368	634	365	637	0.75	96.5779
	Phvul.002G287900.2	-	617	Pkinase	PF00069.30	263	6.1e-17	62.9	0	1	1	6.9e-18	1.4e-16	61.7	0	5	258	322	588	319	590	0.79	96.5779
	Phvul.009G023800.1	-	904	Pkinase	PF00069.30	263	2.5e-15	57.6	0	1	1	1.9e-16	4e-15	56.9	0	6	259	520	794	515	796	0.77	96.5779
	Phvul.006G019900.1	-	1607	Pkinase	PF00069.30	263	5.7e-109	364.6	3.4	3	3	7.3e-34	1.5e-32	114.1	0	6	258	1224	1480	1219	1484	0.87	96.1977
	Phvul.007G144600.1	-	491	Pkinase	PF00069.30	263	4.7e-67	227.2	0	1	1	3.7e-68	7.5e-67	226.5	0	2	254	48	300	47	314	0.93	96.1977
	Phvul.001G130800.1	-	756	Pkinase	PF00069.30	263	3.6e-52	178.4	0.1	1	1	2.6e-53	5.3e-52	177.8	0.1	6	258	431	693	426	703	0.9	96.1977
	Phvul.010G057600.1	-	806	Pkinase	PF00069.30	263	5.2e-51	174.6	0	1	1	4e-52	8.2e-51	173.9	0	5	257	519	794	517	800	0.82	96.1977
	Phvul.001G066200.1	-	730	Pkinase	PF00069.30	263	1.1e-50	173.5	0.1	1	1	7.9e-52	1.6e-50	173	0.1	6	258	404	666	399	680	0.89	96.1977
	Phvul.007G051000.1	-	656	Pkinase	PF00069.30	263	1e-49	170.3	0	1	1	1.3e-50	2.6e-49	169	0	2	254	337	600	336	607	0.8	96.1977
	Phvul.003G164800.1	-	811	Pkinase	PF00069.30	263	2.5e-49	169.1	0	1	1	1.9e-50	3.9e-49	168.4	0	6	258	529	791	525	793	0.86	96.1977
	Phvul.L002151.1	-	1033	Pkinase	PF00069.30	263	6.1e-49	167.8	0	1	1	4.3e-50	8.8e-49	167.3	0	3	255	725	991	723	996	0.78	96.1977
	Phvul.008G030400.1	-	838	Pkinase	PF00069.30	263	3.5e-47	162	0	1	1	3e-48	6.2e-47	161.2	0	6	258	509	773	504	776	0.89	96.1977
	Phvul.011G007900.1	-	944	Pkinase	PF00069.30	263	3.7e-47	161.9	0	1	1	2.7e-48	5.4e-47	161.4	0	6	258	677	936	672	941	0.86	96.1977
	Phvul.004G039600.1	-	865	Pkinase	PF00069.30	263	5.4e-47	161.4	0	1	1	4.1e-48	8.4e-47	160.8	0	6	258	533	797	528	802	0.9	96.1977
	Phvul.009G239901.1	-	343	Pkinase	PF00069.30	263	1e-45	157.2	0	1	1	6.8e-47	1.4e-45	156.8	0	6	258	35	297	31	300	0.84	96.1977
	Phvul.005G013200.1	-	693	Pkinase	PF00069.30	263	1.9e-44	153	0	1	1	9e-45	1.8e-43	149.8	0	6	258	319	573	314	576	0.84	96.1977
	Phvul.004G038800.1	-	891	Pkinase	PF00069.30	263	3.8e-44	152.1	0	1	1	3.1e-45	6.3e-44	151.4	0	6	258	537	801	532	805	0.88	96.1977
	Phvul.011G210400.1	-	889	Pkinase	PF00069.30	263	7.7e-44	151.1	0	1	1	5.4e-45	1.1e-43	150.6	0	3	255	525	786	523	791	0.8	96.1977
	Phvul.008G030800.1	-	866	Pkinase	PF00069.30	263	9.7e-44	150.7	0	1	1	8.1e-45	1.6e-43	150	0	6	258	520	784	515	787	0.88	96.1977
	Phvul.002G187300.1	-	1269	Pkinase	PF00069.30	263	1e-43	150.6	0	1	1	7e-45	1.4e-43	150.2	0	6	258	971	1246	966	1253	0.83	96.1977
	Phvul.005G156500.1	-	493	Pkinase	PF00069.30	263	1.2e-42	147.2	0	1	1	8.9e-44	1.8e-42	146.6	0	5	257	223	477	219	480	0.88	96.1977
	Phvul.003G015900.1	-	792	Pkinase	PF00069.30	263	1.3e-42	147.1	0	1	1	1.3e-43	2.7e-42	146	0	5	257	478	767	475	771	0.77	96.1977
	Phvul.005G162500.1	-	882	Pkinase	PF00069.30	263	2e-42	146.4	0	1	1	1.7e-43	3.5e-42	145.6	0	5	257	579	840	576	844	0.9	96.1977
	Phvul.005G162300.1	-	847	Pkinase	PF00069.30	263	2.7e-42	146	0	1	1	2.3e-43	4.7e-42	145.2	0	5	257	544	805	541	809	0.91	96.1977
	Phvul.011G148700.1	-	845	Pkinase	PF00069.30	263	4.6e-42	145.2	0	1	1	3.3e-43	6.7e-42	144.7	0	5	257	508	770	504	774	0.8	96.1977
	Phvul.008G044600.1	-	721	Pkinase	PF00069.30	263	1.8e-41	143.3	0	1	1	1.7e-42	3.4e-41	142.4	0	5	257	438	692	434	697	0.85	96.1977
	Phvul.005G163500.1	-	880	Pkinase	PF00069.30	263	7e-41	141.4	0	1	1	6.1e-42	1.2e-40	140.5	0	5	257	575	836	572	840	0.9	96.1977
	Phvul.008G044400.1	-	731	Pkinase	PF00069.30	263	6.1e-40	138.3	0	1	1	4.5e-41	9.1e-40	137.7	0	5	257	443	697	439	702	0.84	96.1977
	Phvul.003G251900.1	-	400	Pkinase	PF00069.30	263	1.9e-38	133.4	0	1	1	1.4e-39	2.9e-38	132.8	0	7	259	64	314	59	319	0.87	96.1977
	Phvul.004G039400.1	-	820	Pkinase	PF00069.30	263	3e-37	129.5	0	1	1	3.5e-38	7.2e-37	128.2	0	5	257	511	791	507	794	0.81	96.1977
	Phvul.008G245000.1	-	809	Pkinase	PF00069.30	263	7.2e-36	124.9	0	1	1	5.8e-37	1.2e-35	124.2	0	6	258	477	745	472	750	0.76	96.1977
	Phvul.009G042300.1	-	640	Pkinase	PF00069.30	263	9.3e-34	118	0	1	1	6.5e-35	1.3e-33	117.5	0	5	257	353	613	350	632	0.8	96.1977
	Phvul.009G042300.2	-	640	Pkinase	PF00069.30	263	9.3e-34	118	0	1	1	6.5e-35	1.3e-33	117.5	0	5	257	353	613	350	632	0.8	96.1977
	Phvul.007G032100.1	-	713	Pkinase	PF00069.30	263	1.8e-31	110.5	0	1	1	2e-32	4.1e-31	109.4	0	7	259	415	703	411	705	0.8	96.1977
	Phvul.009G136800.1	-	626	Pkinase	PF00069.30	263	4.1e-29	102.8	0	1	1	3e-30	6e-29	102.2	0	5	257	325	585	322	589	0.81	96.1977
	Phvul.009G136800.2	-	626	Pkinase	PF00069.30	263	4.1e-29	102.8	0	1	1	3e-30	6e-29	102.2	0	5	257	325	585	322	589	0.81	96.1977
	Phvul.009G136800.3	-	626	Pkinase	PF00069.30	263	4.1e-29	102.8	0	1	1	3e-30	6e-29	102.2	0	5	257	325	585	322	589	0.81	96.1977
	Phvul.007G040400.1	-	785	Pkinase	PF00069.30	263	2.1e-28	100.4	0	1	1	3.9e-28	8e-27	95.3	0	7	259	483	773	479	775	0.85	96.1977
	Phvul.009G140500.1	-	1043	Pkinase	PF00069.30	263	2.3e-28	100.3	0	1	1	1.7e-29	3.4e-28	99.8	0	5	257	767	1034	764	1038	0.82	96.1977
	Phvul.003G240400.1	-	752	Pkinase	PF00069.30	263	3.6e-28	99.7	0	1	1	3e-28	6.1e-27	95.7	0	7	259	443	734	438	736	0.9	96.1977
	Phvul.008G152500.1	-	624	Pkinase	PF00069.30	263	2.1e-23	84.1	0.3	1	1	2e-23	4.2e-22	79.8	0.3	5	257	360	605	357	608	0.81	96.1977
	Phvul.006G071600.1	-	678	Pkinase	PF00069.30	263	3.3e-21	76.9	0	1	1	2.5e-22	5e-21	76.3	0	7	259	388	640	384	642	0.83	96.1977
	Phvul.002G287900.1	-	661	Pkinase	PF00069.30	263	7.1e-17	62.7	0	1	1	8.1e-18	1.7e-16	61.5	0	6	258	367	632	363	634	0.79	96.1977
	Phvul.001G014400.1	-	859	Pkinase	PF00069.30	263	2.1e-16	61.2	0	1	1	1.7e-17	3.4e-16	60.4	0	7	259	491	760	485	762	0.8	96.1977
	Phvul.011G185500.1	-	836	Pkinase	PF00069.30	263	1.5e-13	51.8	0.1	1	1	1.5e-14	3e-13	50.8	0	6	258	542	805	537	810	0.8	96.1977
	Phvul.009G179100.1	-	357	Pkinase	PF00069.30	263	2.5e-58	198.6	0	1	1	1.5e-59	3.1e-58	198.2	0	8	259	64	309	58	313	0.93	95.8175
	Phvul.001G066400.1	-	751	Pkinase	PF00069.30	263	3.2e-51	175.2	0	1	1	2.4e-52	4.8e-51	174.7	0	6	257	425	686	420	690	0.89	95.8175
	Phvul.001G066300.1	-	728	Pkinase	PF00069.30	263	8.5e-51	173.9	0.1	1	1	6.2e-52	1.3e-50	173.3	0.1	6	257	402	663	397	666	0.88	95.8175
	Phvul.004G039800.1	-	813	Pkinase	PF00069.30	263	1.1e-49	170.2	0	1	1	1.7e-50	3.4e-49	168.6	0	6	257	522	785	517	790	0.89	95.8175
	Phvul.004G039700.1	-	801	Pkinase	PF00069.30	263	6e-49	167.8	0	1	1	8.4e-50	1.7e-48	166.3	0	6	257	510	773	505	778	0.89	95.8175
	Phvul.006G108300.1	-	594	Pkinase	PF00069.30	263	2.5e-46	159.2	0	1	1	1.9e-47	3.8e-46	158.6	0	6	257	298	555	295	559	0.83	95.8175
	Phvul.008G030200.1	-	864	Pkinase	PF00069.30	263	2.3e-45	156	0	2	2	8.1e-45	1.6e-43	150	0	6	257	518	781	513	785	0.86	95.8175
	Phvul.004G039900.1	-	829	Pkinase	PF00069.30	263	6.6e-44	151.3	0	1	1	5.3e-45	1.1e-43	150.6	0	6	257	511	774	506	777	0.86	95.8175
	Phvul.011G191900.1	-	661	Pkinase	PF00069.30	263	1.7e-43	150	0	1	1	1.7e-44	3.4e-43	148.9	0	6	257	301	555	296	559	0.89	95.8175
	Phvul.005G164000.1	-	879	Pkinase	PF00069.30	263	4.5e-42	145.3	0	1	1	3.5e-43	7.2e-42	144.6	0	4	255	574	834	571	839	0.9	95.8175
	Phvul.005G164100.1	-	882	Pkinase	PF00069.30	263	4.8e-42	145.2	0	1	1	3.8e-43	7.7e-42	144.5	0	4	255	580	840	577	846	0.89	95.8175
	Phvul.005G164300.1	-	877	Pkinase	PF00069.30	263	9.7e-42	144.2	0	1	1	8.1e-43	1.7e-41	143.4	0	4	255	575	835	572	840	0.91	95.8175
	Phvul.005G163000.1	-	881	Pkinase	PF00069.30	263	1.8e-41	143.3	0	1	1	1.3e-42	2.7e-41	142.7	0	4	255	576	836	573	841	0.9	95.8175
	Phvul.010G165000.1	-	776	Pkinase	PF00069.30	263	5.3e-41	141.8	0	1	1	3.2e-41	6.6e-40	138.2	0	2	253	461	722	460	730	0.88	95.8175
	Phvul.005G164500.1	-	880	Pkinase	PF00069.30	263	9e-41	141	0	1	1	8.5e-42	1.7e-40	140.1	0	4	255	578	838	575	843	0.91	95.8175
	Phvul.005G162600.1	-	880	Pkinase	PF00069.30	263	2.3e-40	139.7	0	1	1	2.2e-41	4.5e-40	138.7	0	4	255	575	835	572	840	0.9	95.8175
	Phvul.004G177800.2	-	734	Pkinase	PF00069.30	263	9.7e-40	137.6	0	1	1	8.8e-41	1.8e-39	136.8	0	3	254	438	692	436	699	0.85	95.8175
	Phvul.003G120800.1	-	360	Pkinase	PF00069.30	263	1e-39	137.6	0	1	1	6.1e-41	1.2e-39	137.3	0	4	255	70	337	67	343	0.82	95.8175
	Phvul.003G120800.2	-	360	Pkinase	PF00069.30	263	1e-39	137.6	0	1	1	6.1e-41	1.2e-39	137.3	0	4	255	70	337	67	343	0.82	95.8175
	Phvul.004G177800.1	-	763	Pkinase	PF00069.30	263	1.1e-39	137.5	0	1	1	9.5e-41	1.9e-39	136.6	0	3	254	438	692	436	699	0.85	95.8175
	Phvul.005G163800.11	-	852	Pkinase	PF00069.30	263	4.6e-39	135.4	0	1	1	4.2e-40	8.6e-39	134.5	0	4	255	546	806	543	811	0.88	95.8175
	Phvul.005G163800.12	-	852	Pkinase	PF00069.30	263	4.6e-39	135.4	0	1	1	4.2e-40	8.6e-39	134.5	0	4	255	546	806	543	811	0.88	95.8175
	Phvul.005G163800.13	-	852	Pkinase	PF00069.30	263	4.6e-39	135.4	0	1	1	4.2e-40	8.6e-39	134.5	0	4	255	546	806	543	811	0.88	95.8175
	Phvul.005G163800.10	-	853	Pkinase	PF00069.30	263	4.6e-39	135.4	0	1	1	4.2e-40	8.6e-39	134.5	0	4	255	546	806	543	811	0.88	95.8175
	Phvul.005G163800.8	-	853	Pkinase	PF00069.30	263	4.6e-39	135.4	0	1	1	4.2e-40	8.6e-39	134.5	0	4	255	546	806	543	811	0.88	95.8175
	Phvul.005G163800.9	-	853	Pkinase	PF00069.30	263	4.6e-39	135.4	0	1	1	4.2e-40	8.6e-39	134.5	0	4	255	546	806	543	811	0.88	95.8175
	Phvul.005G163800.5	-	876	Pkinase	PF00069.30	263	4.8e-39	135.3	0	1	1	4.4e-40	9e-39	134.4	0	4	255	570	830	567	835	0.88	95.8175
	Phvul.005G163800.6	-	876	Pkinase	PF00069.30	263	4.8e-39	135.3	0	1	1	4.4e-40	9e-39	134.4	0	4	255	570	830	567	835	0.88	95.8175
	Phvul.005G163800.7	-	876	Pkinase	PF00069.30	263	4.8e-39	135.3	0	1	1	4.4e-40	9e-39	134.4	0	4	255	570	830	567	835	0.88	95.8175
	Phvul.005G163800.2	-	877	Pkinase	PF00069.30	263	4.8e-39	135.3	0	1	1	4.5e-40	9.1e-39	134.4	0	4	255	570	830	567	835	0.88	95.8175
	Phvul.005G163800.3	-	877	Pkinase	PF00069.30	263	4.8e-39	135.3	0	1	1	4.5e-40	9.1e-39	134.4	0	4	255	570	830	567	835	0.88	95.8175
	Phvul.005G163800.4	-	877	Pkinase	PF00069.30	263	4.8e-39	135.3	0	1	1	4.5e-40	9.1e-39	134.4	0	4	255	570	830	567	835	0.88	95.8175
	Phvul.L001750.1	-	564	Pkinase	PF00069.30	263	1.6e-33	117.2	0	1	1	1.4e-34	2.8e-33	116.4	0	7	258	72	335	66	340	0.83	95.8175
	Phvul.005G164200.1	-	849	Pkinase	PF00069.30	263	7.3e-30	105.3	0	1	1	6.7e-31	1.4e-29	104.4	0	4	255	559	807	556	813	0.88	95.8175
	Phvul.008G031100.1	-	311	Pkinase	PF00069.30	263	2.8e-28	100.1	0	1	1	1.7e-29	3.4e-28	99.8	0	6	257	32	295	27	301	0.85	95.8175
	Phvul.008G258700.1	-	691	Pkinase	PF00069.30	263	1.3e-23	84.8	0	1	1	1.2e-24	2.5e-23	83.9	0	7	258	405	657	401	660	0.78	95.8175
	Phvul.009G180700.1	-	627	Pkinase	PF00069.30	263	1.9e-23	84.2	0.1	1	1	2e-24	4.1e-23	83.1	0.1	7	258	359	609	355	612	0.82	95.8175
	Phvul.003G068400.1	-	736	Pkinase	PF00069.30	263	3.8e-15	57	0.1	1	1	3.5e-16	7.2e-15	56.1	0.1	7	258	455	713	449	716	0.81	95.8175
	Phvul.007G060400.1	-	380	Pkinase	PF00069.30	263	3.5e-51	175.1	0	1	1	2.9e-52	5.8e-51	174.4	0	9	259	84	349	77	351	0.9	95.4373
	Phvul.002G043600.1	-	387	Pkinase	PF00069.30	263	8.8e-48	164	0	1	1	7.1e-49	1.5e-47	163.3	0	9	259	88	356	82	358	0.91	95.4373
	Phvul.002G043600.2	-	387	Pkinase	PF00069.30	263	8.8e-48	164	0	1	1	7.1e-49	1.5e-47	163.3	0	9	259	88	356	82	358	0.91	95.4373
	Phvul.009G130300.1	-	753	Pkinase	PF00069.30	263	2.1e-43	149.6	0	1	1	3.9e-44	7.9e-43	147.8	0	5	255	409	670	405	676	0.81	95.4373
	Phvul.005G162100.1	-	892	Pkinase	PF00069.30	263	2.7e-42	146	0	1	1	2.8e-43	5.8e-42	144.9	0	4	254	590	849	588	855	0.88	95.4373
	Phvul.009G102500.2	-	775	Pkinase	PF00069.30	263	9.5e-41	140.9	0	1	1	2.8e-41	5.7e-40	138.4	0	4	254	464	716	461	722	0.86	95.4373
	Phvul.009G102500.1	-	776	Pkinase	PF00069.30	263	9.5e-41	140.9	0	1	1	2.8e-41	5.7e-40	138.4	0	4	254	465	717	462	723	0.86	95.4373
	Phvul.002G302700.1	-	778	Pkinase	PF00069.30	263	2.7e-39	136.2	0.1	1	1	4.9e-40	1e-38	134.3	0	4	254	455	707	452	713	0.86	95.4373
	Phvul.008G236900.1	-	644	Pkinase	PF00069.30	263	1.5e-35	123.9	0	1	1	1.1e-36	2.2e-35	123.4	0	5	255	339	595	336	606	0.84	95.4373
	Phvul.001G243600.1	-	407	Pkinase	PF00069.30	263	6e-26	92.4	0.1	1	1	3e-26	6.2e-25	89.1	0.1	9	259	124	380	117	382	0.79	95.4373
	Phvul.001G138500.1	-	653	Pkinase	PF00069.30	263	8.5e-26	91.9	0	1	1	6.1e-27	1.2e-25	91.4	0	7	257	346	636	341	640	0.83	95.4373
	Phvul.008G275000.1	-	607	Pkinase	PF00069.30	263	1.9e-22	80.9	0	1	1	1.5e-23	3e-22	80.3	0	10	260	311	560	309	562	0.83	95.4373
	Phvul.008G176300.2	-	252	Pkinase	PF00069.30	263	3.2e-65	221.2	0	1	1	1.8e-66	3.7e-65	220.9	0	1	250	4	247	4	249	0.93	95.057
	Phvul.005G038600.1	-	313	Pkinase	PF00069.30	263	3.6e-59	201.3	0	1	1	2.5e-60	5.2e-59	200.8	0	9	258	59	301	54	304	0.92	95.057
	Phvul.006G184700.1	-	459	Pkinase	PF00069.30	263	7.3e-59	200.3	0	1	1	5.3e-60	1.1e-58	199.8	0	10	259	162	407	158	409	0.94	95.057
	Phvul.006G184700.2	-	459	Pkinase	PF00069.30	263	7.3e-59	200.3	0	1	1	5.3e-60	1.1e-58	199.8	0	10	259	162	407	158	409	0.94	95.057
	Phvul.003G082800.1	-	381	Pkinase	PF00069.30	263	2e-57	195.6	0	1	1	1.4e-58	2.9e-57	195	0	9	258	92	335	86	338	0.93	95.057
	Phvul.006G144200.1	-	375	Pkinase	PF00069.30	263	3.3e-57	194.9	0	1	1	2.4e-58	5e-57	194.3	0	9	258	85	328	79	331	0.93	95.057
	Phvul.006G144200.2	-	375	Pkinase	PF00069.30	263	3.3e-57	194.9	0	1	1	2.4e-58	5e-57	194.3	0	9	258	85	328	79	331	0.93	95.057
	Phvul.002G301900.1	-	416	Pkinase	PF00069.30	263	1.2e-55	189.8	0	1	1	8.3e-57	1.7e-55	189.3	0	9	258	143	386	136	389	0.93	95.057
	Phvul.004G178600.1	-	416	Pkinase	PF00069.30	263	1.8e-55	189.2	0	1	1	1.2e-56	2.5e-55	188.7	0	9	258	143	386	136	389	0.94	95.057
	Phvul.003G199900.2	-	355	Pkinase	PF00069.30	263	2.1e-55	188.9	0	1	1	1.4e-56	2.9e-55	188.5	0	9	258	65	308	59	311	0.93	95.057
	Phvul.005G163100.1	-	887	Pkinase	PF00069.30	263	8e-43	147.7	0	1	1	1.3e-43	2.6e-42	146	0	5	254	586	844	583	850	0.88	95.057
	Phvul.004G040000.1	-	819	Pkinase	PF00069.30	263	6.8e-42	144.7	0	1	1	9e-43	1.8e-41	143.3	0	6	255	501	762	496	767	0.81	95.057
	Phvul.010G134200.1	-	716	Pkinase	PF00069.30	263	4.7e-39	135.4	0.1	1	1	5.6e-39	1.1e-37	130.8	0	5	254	437	688	433	694	0.86	95.057
	Phvul.001G017000.1	-	593	Pkinase	PF00069.30	263	2.3e-34	120	0.1	1	1	1.9e-35	3.9e-34	119.2	0.1	10	259	311	567	310	570	0.8	95.057
	Phvul.L005143.2	-	659	Pkinase	PF00069.30	263	1.1e-31	111.2	0	1	1	1e-32	2.1e-31	110.3	0	6	255	320	571	315	578	0.87	95.057
	Phvul.L005143.1	-	819	Pkinase	PF00069.30	263	1.5e-31	110.7	0	1	1	1.6e-32	3.3e-31	109.7	0	6	255	480	731	475	738	0.87	95.057
	Phvul.002G089300.1	-	695	Pkinase	PF00069.30	263	5.5e-09	36.8	0	1	1	1.2e-09	2.4e-08	34.7	0	9	258	424	672	416	675	0.73	95.057
	Phvul.002G229000.1	-	503	Pkinase	PF00069.30	263	1.1e-56	193.2	0	1	1	8.7e-58	1.8e-56	192.5	0	10	258	205	449	200	453	0.93	94.6768
	Phvul.002G229000.2	-	503	Pkinase	PF00069.30	263	1.1e-56	193.2	0	1	1	8.7e-58	1.8e-56	192.5	0	10	258	205	449	200	453	0.93	94.6768
	Phvul.L001540.1	-	446	Pkinase	PF00069.30	263	7.3e-42	144.6	0	1	1	1.3e-42	2.7e-41	142.7	0	6	254	91	353	86	363	0.81	94.6768
	Phvul.008G082400.1	-	898	Pkinase	PF00069.30	263	7.3e-41	141.3	0	1	1	9.2e-42	1.9e-40	140	0	6	254	545	804	540	811	0.8	94.6768
	Phvul.010G100901.1	-	460	Pkinase	PF00069.30	263	7.5e-41	141.3	0	1	1	6.5e-42	1.3e-40	140.5	0	5	253	106	358	102	363	0.88	94.6768
	Phvul.008G062200.1	-	883	Pkinase	PF00069.30	263	1.4e-40	140.4	0	1	1	1.4e-41	2.8e-40	139.4	0	5	253	529	781	525	787	0.88	94.6768
	Phvul.008G062200.2	-	882	Pkinase	PF00069.30	263	1.4e-40	140.4	0	1	1	1.4e-41	2.8e-40	139.4	0	5	253	528	780	524	786	0.88	94.6768
	Phvul.008G062200.3	-	897	Pkinase	PF00069.30	263	1.4e-40	140.3	0	1	1	1.4e-41	2.9e-40	139.3	0	5	253	543	795	539	801	0.88	94.6768
	Phvul.008G139200.1	-	841	Pkinase	PF00069.30	263	8.8e-71	239.4	0	2	2	2.6e-26	5.4e-25	89.3	0	11	258	532	800	522	802	0.84	94.2966
	Phvul.011G071400.2	-	328	Pkinase	PF00069.30	263	1.7e-68	231.9	0	1	1	1.2e-69	2.5e-68	231.3	0	6	253	44	315	41	320	0.89	94.2966
	Phvul.010G043600.1	-	857	Pkinase	PF00069.30	263	8.8e-68	229.6	0	2	2	4.3e-26	8.8e-25	88.6	0	11	258	548	816	538	818	0.87	94.2966
	Phvul.008G039500.1	-	281	Pkinase	PF00069.30	263	3.8e-64	217.6	0	1	1	2.3e-65	4.7e-64	217.3	0	16	263	41	277	27	277	0.92	94.2966
	Phvul.008G039500.2	-	281	Pkinase	PF00069.30	263	3.8e-64	217.6	0	1	1	2.3e-65	4.7e-64	217.3	0	16	263	41	277	27	277	0.92	94.2966
	Phvul.009G173100.3	-	558	Pkinase	PF00069.30	263	4.1e-48	165.1	0.2	1	1	3e-49	6.2e-48	164.5	0.2	16	263	4	247	2	247	0.9	94.2966
	Phvul.009G173100.4	-	558	Pkinase	PF00069.30	263	4.1e-48	165.1	0.2	1	1	3e-49	6.2e-48	164.5	0.2	16	263	4	247	2	247	0.9	94.2966
	Phvul.010G099400.6	-	848	Pkinase	PF00069.30	263	9.3e-41	141	0	1	1	1e-41	2.1e-40	139.8	0	5	252	494	745	490	750	0.88	94.2966
	Phvul.010G099400.2	-	890	Pkinase	PF00069.30	263	1e-40	140.8	0	1	1	1.1e-41	2.3e-40	139.7	0	5	252	536	787	532	792	0.88	94.2966
	Phvul.010G099400.4	-	890	Pkinase	PF00069.30	263	1e-40	140.8	0	1	1	1.1e-41	2.3e-40	139.7	0	5	252	536	787	532	792	0.88	94.2966
	Phvul.010G099400.5	-	890	Pkinase	PF00069.30	263	1e-40	140.8	0	1	1	1.1e-41	2.3e-40	139.7	0	5	252	536	787	532	792	0.88	94.2966
	Phvul.010G099400.3	-	901	Pkinase	PF00069.30	263	1.1e-40	140.8	0	1	1	1.2e-41	2.4e-40	139.6	0	5	252	547	798	543	803	0.88	94.2966
	Phvul.008G026600.1	-	345	Pkinase	PF00069.30	263	1.3e-29	104.5	0	1	1	8.7e-31	1.8e-29	104	0	10	257	46	300	42	307	0.84	94.2966
	Phvul.008G122400.2	-	595	Pkinase	PF00069.30	263	3e-24	86.9	0	1	1	2.2e-25	4.4e-24	86.3	0	12	259	306	568	299	570	0.84	94.2966
	Phvul.008G122400.1	-	687	Pkinase	PF00069.30	263	4.1e-24	86.4	0	1	1	3e-25	6.1e-24	85.8	0	12	259	398	660	391	662	0.84	94.2966
	Phvul.009G259800.1	-	640	Pkinase	PF00069.30	263	3.6e-13	50.5	0	1	1	3.3e-13	6.6e-12	46.4	0	11	258	357	596	347	600	0.79	94.2966
	Phvul.001G045100.3	-	527	Pkinase	PF00069.30	263	5.2e-40	138.5	0	1	1	2.8e-40	5.7e-39	135.1	0	6	252	257	505	252	515	0.84	93.9163
	Phvul.001G045100.1	-	671	Pkinase	PF00069.30	263	9.4e-40	137.7	0	1	1	4.8e-40	9.8e-39	134.3	0	6	252	401	649	396	659	0.84	93.9163
	Phvul.002G025700.1	-	616	Pkinase	PF00069.30	263	2.7e-37	129.6	0	1	1	5.2e-38	1.1e-36	127.7	0	14	260	352	606	350	607	0.83	93.9163
	Phvul.003G260300.1	-	1154	Pkinase	PF00069.30	263	7.3e-33	115.1	0	1	1	4.9e-34	9.9e-33	114.6	0	11	257	869	1128	859	1131	0.76	93.9163
	Phvul.002G111100.1	-	1131	Pkinase	PF00069.30	263	6e-32	112.1	0	1	1	4e-33	8.1e-32	111.7	0	11	257	847	1105	837	1108	0.79	93.9163
	Phvul.011G064400.1	-	800	Pkinase	PF00069.30	263	7.2e-31	108.5	0	1	1	8.2e-32	1.7e-30	107.3	0	9	255	464	712	461	720	0.86	93.9163
	Phvul.001G095500.1	-	691	Pkinase	PF00069.30	263	1e-29	104.8	0	1	1	8e-31	1.6e-29	104.1	0	13	259	381	655	380	657	0.83	93.9163
	Phvul.004G023700.1	-	606	Pkinase	PF00069.30	263	1.2e-24	88.2	0	1	1	8.3e-26	1.7e-24	87.7	0	13	259	320	576	317	578	0.87	93.9163
	Phvul.004G084688.1	-	947	Pkinase	PF00069.30	263	1.3e-22	81.4	0	1	1	1.1e-23	2.2e-22	80.8	0	13	259	686	941	683	944	0.86	93.9163
	Phvul.007G280200.1	-	639	Pkinase	PF00069.30	263	7.4e-42	144.6	0.2	1	1	5.4e-43	1.1e-41	144	0.2	13	258	364	613	363	616	0.85	93.5361
	Phvul.005G165900.1	-	652	Pkinase	PF00069.30	263	5.4e-40	138.5	0.1	1	1	3.8e-41	7.7e-40	138	0.1	13	258	359	621	357	624	0.84	93.5361
	Phvul.005G165900.2	-	663	Pkinase	PF00069.30	263	5.6e-40	138.4	0.1	1	1	3.9e-41	8e-40	137.9	0.1	13	258	370	632	368	635	0.84	93.5361
	Phvul.002G117600.2	-	736	Pkinase	PF00069.30	263	1.7e-35	123.7	0	1	1	2.9e-36	6e-35	121.9	0	3	248	464	724	462	731	0.82	93.5361
	Phvul.008G027200.1	-	345	Pkinase	PF00069.30	263	1.7e-25	90.9	0	1	1	1.1e-26	2.3e-25	90.5	0	12	257	50	301	39	304	0.81	93.5361
	Phvul.010G075300.1	-	491	Pkinase	PF00069.30	263	1.3e-22	81.4	0	1	1	9.8e-24	2e-22	80.9	0	14	259	72	308	62	311	0.89	93.5361
	Phvul.004G072600.1	-	783	Pkinase	PF00069.30	263	1.8e-15	58.1	0	1	1	1.4e-16	2.8e-15	57.4	0	13	258	489	746	479	751	0.78	93.5361
	Phvul.003G229100.1	-	496	Pkinase	PF00069.30	263	2.9e-27	96.7	0	1	1	2.1e-28	4.3e-27	96.2	0	14	258	76	311	68	315	0.9	93.1559
	Phvul.008G291100.1	-	538	Pkinase	PF00069.30	263	3.2e-26	93.3	0	1	1	3e-27	6.1e-26	92.4	0	14	258	97	333	87	336	0.87	93.1559
	Phvul.010G097200.1	-	491	Pkinase	PF00069.30	263	5e-24	86.1	0	1	1	3.8e-25	7.7e-24	85.5	0	14	258	72	307	62	310	0.88	93.1559
	Phvul.011G060100.1	-	492	Pkinase	PF00069.30	263	1.8e-23	84.3	0	1	1	1.3e-24	2.7e-23	83.7	0	14	258	73	308	64	311	0.89	93.1559
	Phvul.011G060100.2	-	493	Pkinase	PF00069.30	263	1.8e-23	84.3	0	1	1	1.3e-24	2.7e-23	83.7	0	14	258	73	308	64	311	0.89	93.1559
	Phvul.002G289000.1	-	490	Pkinase	PF00069.30	263	5.3e-23	82.8	0	1	1	4.4e-24	8.9e-23	82	0	14	258	75	310	65	313	0.9	93.1559
	Phvul.008G030000.1	-	339	Pkinase	PF00069.30	263	1.2e-40	140.6	0	1	1	8.9e-42	1.8e-40	140	0	14	257	56	304	51	310	0.87	92.7757
	Phvul.008G029600.1	-	337	Pkinase	PF00069.30	263	1.3e-40	140.5	0	1	1	9.4e-42	1.9e-40	139.9	0	14	257	56	302	51	308	0.87	92.7757
	Phvul.008G029700.1	-	366	Pkinase	PF00069.30	263	1.3e-37	130.7	0.1	1	1	9.3e-37	1.9e-35	123.6	0.1	14	257	56	326	51	331	0.88	92.7757
	Phvul.008G030100.1	-	343	Pkinase	PF00069.30	263	6.6e-37	128.3	0	1	1	4.6e-38	9.5e-37	127.8	0	14	257	56	303	51	308	0.87	92.7757
	Phvul.004G169300.1	-	1079	Pkinase	PF00069.30	263	2.4e-32	113.4	0	1	1	1.9e-33	3.8e-32	112.7	0	21	263	787	1021	778	1021	0.92	92.3954
	Phvul.008G105600.1	-	992	Pkinase	PF00069.30	263	1e-40	140.9	0	1	1	7.9e-42	1.6e-40	140.2	0	2	243	669	952	668	960	0.81	92.0152
	Phvul.002G247900.1	-	475	Pkinase	PF00069.30	263	1.9e-46	159.6	0	1	1	1.5e-47	3e-46	159	0	18	258	207	450	199	452	0.89	91.635
	Phvul.004G039100.1	-	336	Pkinase	PF00069.30	263	4.9e-33	115.7	0	1	1	3.2e-34	6.5e-33	115.3	0	14	254	56	314	52	325	0.78	91.635
	Phvul.003G181000.1	-	342	Pkinase	PF00069.30	263	8.3e-32	111.6	0	1	1	1.5e-31	3.1e-30	106.5	0	20	260	66	332	28	333	0.81	91.635
	Phvul.006G169700.1	-	455	Pkinase	PF00069.30	263	3.7e-53	181.6	0	1	1	2.5e-54	5.2e-53	181.1	0	21	259	169	405	160	409	0.9	90.8745
	Phvul.006G019900.1	-	1607	Pkinase	PF00069.30	263	5.7e-109	364.6	3.4	2	3	2.8e-36	5.8e-35	122	0	22	259	780	1022	765	1024	0.85	90.4943
	Phvul.008G190300.1	-	453	Pkinase	PF00069.30	263	5.3e-53	181.1	0	1	1	3.7e-54	7.5e-53	180.6	0	22	259	167	406	160	408	0.92	90.4943
	Phvul.006G019900.1	-	1607	Pkinase	PF00069.30	263	5.7e-109	364.6	3.4	1	3	8.1e-38	1.6e-36	127	0.9	22	258	330	569	319	572	0.84	90.1141
	Phvul.008G264100.1	-	453	Pkinase	PF00069.30	263	3.1e-52	178.6	0	1	1	2.2e-53	4.4e-52	178.1	0	22	258	167	405	160	408	0.92	90.1141
	Phvul.008G029932.1	-	338	Pkinase	PF00069.30	263	1.4e-37	130.5	0	1	1	1e-38	2e-37	130	0	21	257	64	301	57	306	0.88	90.1141
	Phvul.001G147001.2	-	284	Pkinase	PF00069.30	263	2.2e-36	126.6	0	1	1	1.4e-37	2.8e-36	126.3	0	24	259	5	255	3	259	0.81	89.7338
	Phvul.L001540.2	-	346	Pkinase	PF00069.30	263	1.3e-35	124.1	0	1	1	1e-36	2e-35	123.5	0	19	254	4	253	1	262	0.8	89.7338
	Phvul.005G025000.1	-	1638	Pkinase	PF00069.30	263	2.2e-29	103.7	0	1	1	1.8e-30	3.7e-29	102.9	0	24	258	180	436	163	439	0.87	89.3536
	Phvul.005G078800.1	-	366	Pkinase	PF00069.30	263	4.5e-47	161.7	0	1	1	2.9e-48	5.9e-47	161.3	0	2	235	24	275	23	305	0.79	88.9734
	Phvul.002G238900.3	-	621	Pkinase	PF00069.30	263	1.1e-15	58.8	0.1	1	1	1.8e-16	3.6e-15	57.1	0.1	24	257	348	586	337	589	0.73	88.9734
	Phvul.002G238900.1	-	697	Pkinase	PF00069.30	263	1.5e-15	58.3	0.1	1	1	2.2e-16	4.5e-15	56.8	0.1	24	257	424	662	413	665	0.73	88.9734
	Phvul.002G238900.2	-	710	Pkinase	PF00069.30	263	1.6e-15	58.3	0.1	1	1	2.3e-16	4.7e-15	56.7	0.1	24	257	437	675	426	678	0.73	88.9734
	Phvul.007G185900.3	-	704	Pkinase	PF00069.30	263	5.5e-40	138.4	0	1	1	4.1e-41	8.3e-40	137.8	0	30	262	27	250	20	251	0.87	88.5932
	Phvul.001G147001.1	-	305	Pkinase	PF00069.30	263	9.1e-36	124.6	0	1	1	5.8e-37	1.2e-35	124.2	0	27	259	29	276	23	280	0.8	88.5932
	Phvul.005G181000.1	-	428	Pkinase	PF00069.30	263	2.1e-42	146.3	0.1	1	1	2.2e-43	4.4e-42	145.3	0	28	259	164	402	148	405	0.79	88.2129
	Phvul.011G081800.1	-	630	Pkinase	PF00069.30	263	1.9e-23	84.2	0	1	1	1.8e-24	3.6e-23	83.3	0	28	259	387	624	366	626	0.79	88.2129
	Phvul.004G154500.1	-	635	Pkinase	PF00069.30	263	7.3e-78	262.6	0.2	1	2	1.1e-30	2.2e-29	103.7	0	29	258	72	316	50	319	0.79	87.4525
	Phvul.005G008900.1	-	808	Pkinase	PF00069.30	263	3.9e-40	138.9	0	1	1	4.2e-41	8.6e-40	137.8	0	5	232	458	687	454	724	0.85	86.692
	Phvul.004G044200.2	-	232	Pkinase	PF00069.30	263	7.5e-43	147.8	0.1	1	1	4.1e-44	8.4e-43	147.7	0.1	23	248	3	228	1	230	0.89	85.9316
	Phvul.008G212500.1	-	661	Pkinase	PF00069.30	263	3.1e-36	126.1	0	1	1	4.6e-37	9.4e-36	124.5	0	33	257	387	628	368	631	0.81	85.5513
	Phvul.005G164700.2	-	802	Pkinase	PF00069.30	263	1.7e-44	153.2	0	1	1	1.4e-45	2.9e-44	152.4	0	3	224	502	729	500	767	0.87	84.4106
	Phvul.005G164700.1	-	900	Pkinase	PF00069.30	263	2.2e-44	152.8	0	1	1	1.8e-45	3.6e-44	152.1	0	3	224	600	827	598	865	0.87	84.4106
	Phvul.003G152900.1	-	634	Pkinase	PF00069.30	263	8.9e-40	137.7	0	1	1	5.9e-41	1.2e-39	137.3	0	2	223	291	513	290	558	0.84	84.4106
	Phvul.001G069800.1	-	296	Pkinase	PF00069.30	263	1e-38	134.2	0.1	1	1	6.5e-40	1.3e-38	133.9	0.1	38	259	4	239	1	241	0.83	84.4106
	Phvul.001G162300.1	-	452	Pkinase	PF00069.30	263	3.3e-25	90	0	1	1	2.2e-26	4.5e-25	89.6	0	2	223	10	232	9	264	0.83	84.4106
	Phvul.008G083000.1	-	547	Pkinase	PF00069.30	263	5.8e-24	85.9	0	1	1	4.1e-25	8.3e-24	85.4	0	39	260	209	443	184	446	0.86	84.4106
	Phvul.009G050100.2	-	416	Pkinase	PF00069.30	263	9.2e-65	219.6	0	1	1	6.9e-66	1.4e-64	219	0	43	263	8	224	2	224	0.94	84.0304
	Phvul.011G071400.3	-	294	Pkinase	PF00069.30	263	2.4e-62	211.7	0	1	1	1.7e-63	3.4e-62	211.2	0	43	263	4	248	1	248	0.88	84.0304
	Phvul.007G062700.1	-	1111	Pkinase	PF00069.30	263	1.3e-40	140.5	0	1	1	1e-41	2.1e-40	139.8	0	39	259	820	1098	792	1102	0.83	84.0304
	Phvul.011G186900.1	-	527	Pkinase	PF00069.30	263	3.4e-62	211.2	0	2	2	7.7e-59	1.6e-57	196	0	44	263	89	308	68	308	0.9	83.6502
	Phvul.011G216200.1	-	928	Pkinase	PF00069.30	263	1.3e-22	81.5	0	1	1	1.4e-23	2.9e-22	80.3	0	44	263	103	344	90	344	0.79	83.6502
	Phvul.001G110300.1	-	708	Pkinase	PF00069.30	263	8.9e-16	59.1	0	1	1	6.8e-17	1.4e-15	58.4	0	1	220	147	388	147	435	0.77	83.6502
	Phvul.001G073501.2	-	422	Pkinase	PF00069.30	263	3e-27	96.7	0	1	1	2e-28	4.1e-27	96.2	0	1	219	9	228	9	274	0.85	83.27
	Phvul.007G191200.1	-	453	Pkinase	PF00069.30	263	2e-25	90.7	0	1	1	1.3e-26	2.6e-25	90.3	0	2	220	10	229	9	260	0.85	83.27
	Phvul.007G191200.2	-	453	Pkinase	PF00069.30	263	2e-25	90.7	0	1	1	1.3e-26	2.6e-25	90.3	0	2	220	10	229	9	260	0.85	83.27
	Phvul.007G191200.3	-	454	Pkinase	PF00069.30	263	2e-25	90.7	0	1	1	1.3e-26	2.6e-25	90.3	0	2	220	10	229	9	260	0.85	83.27
	Phvul.007G191200.4	-	454	Pkinase	PF00069.30	263	2e-25	90.7	0	1	1	1.3e-26	2.6e-25	90.3	0	2	220	10	229	9	260	0.85	83.27
	Phvul.010G070100.1	-	610	Pkinase	PF00069.30	263	3.2e-17	63.8	0	1	1	2.4e-18	4.9e-17	63.2	0	42	260	277	510	252	513	0.85	83.27
	Phvul.010G070100.2	-	610	Pkinase	PF00069.30	263	3.2e-17	63.8	0	1	1	2.4e-18	4.9e-17	63.2	0	42	260	277	510	252	513	0.85	83.27
	Phvul.010G070100.3	-	610	Pkinase	PF00069.30	263	3.2e-17	63.8	0	1	1	2.4e-18	4.9e-17	63.2	0	42	260	277	510	252	513	0.85	83.27
	Phvul.008G184400.3	-	394	Pkinase	PF00069.30	263	2.5e-63	215	0	1	1	1.9e-64	3.9e-63	214.3	0	46	263	3	210	1	210	0.92	82.8897
	Phvul.007G163000.1	-	924	Pkinase	PF00069.30	263	1.2e-44	153.8	0.1	1	1	8.7e-46	1.8e-44	153.2	0.1	4	221	605	832	603	874	0.82	82.8897
	Phvul.009G014500.1	-	1128	Pkinase	PF00069.30	263	3.7e-29	102.9	0	1	1	2.6e-30	5.3e-29	102.4	0	4	221	837	1067	834	1104	0.78	82.8897
	Phvul.006G072300.1	-	575	Pkinase	PF00069.30	263	7.9e-28	98.6	0	1	1	6e-29	1.2e-27	97.9	0	41	258	351	564	327	567	0.84	82.8897
	Phvul.002G162700.1	-	864	Pkinase	PF00069.30	263	5.2e-31	109	0	1	1	1.1e-31	2.2e-30	107	0	42	258	269	499	256	502	0.83	82.5095
	Phvul.010G111000.1	-	679	Pkinase	PF00069.30	263	5.9e-30	105.6	0	1	1	6.3e-31	1.3e-29	104.4	0	43	258	269	500	260	503	0.85	82.1293
	Phvul.005G132600.1	-	432	Pkinase	PF00069.30	263	3.5e-23	83.4	0	1	1	3.3e-24	6.8e-23	82.4	0	39	254	135	399	124	405	0.81	82.1293
	Phvul.001G096600.3	-	275	Pkinase	PF00069.30	263	5.2e-49	168	0	1	1	3.3e-50	6.8e-49	167.6	0	5	219	30	254	27	267	0.9	81.749
	Phvul.011G098200.2	-	979	Pkinase	PF00069.30	263	5.2e-54	184.4	0	1	1	3.9e-55	8e-54	183.8	0	50	263	2	207	1	207	0.9	81.3688
	Phvul.007G186800.2	-	569	Pkinase	PF00069.30	263	1.5e-51	176.3	0	1	1	1e-52	2.1e-51	175.8	0	50	262	2	206	1	207	0.9	80.9886
	Phvul.002G311000.1	-	416	Pkinase	PF00069.30	263	1.1e-27	98.1	0	1	1	6.9e-29	1.4e-27	97.8	0	1	212	9	227	9	267	0.85	80.6084
	Phvul.002G311000.2	-	416	Pkinase	PF00069.30	263	1.1e-27	98.1	0	1	1	6.9e-29	1.4e-27	97.8	0	1	212	9	227	9	267	0.85	80.6084
	Phvul.001G076900.1	-	685	Pkinase	PF00069.30	263	2.1e-18	67.7	0	1	1	1.4e-19	2.9e-18	67.2	0	1	212	125	352	125	406	0.86	80.6084
	Phvul.001G076900.2	-	685	Pkinase	PF00069.30	263	2.1e-18	67.7	0	1	1	1.4e-19	2.9e-18	67.2	0	1	212	125	352	125	406	0.86	80.6084
	Phvul.010G145900.1	-	711	Pkinase	PF00069.30	263	7.5e-16	59.3	0	1	1	6.1e-17	1.2e-15	58.6	0	1	212	147	381	147	443	0.8	80.6084
	Phvul.009G111300.1	-	707	Pkinase	PF00069.30	263	4.3e-15	56.8	0	1	1	5.1e-16	1e-14	55.6	0	1	212	140	374	140	436	0.78	80.6084
	Phvul.002G021100.7	-	465	Pkinase	PF00069.30	263	1.1e-59	203	0	1	1	7.6e-61	1.5e-59	202.5	0	2	212	230	451	229	463	0.92	80.2281
	Phvul.002G021100.2	-	578	Pkinase	PF00069.30	263	1.8e-59	202.3	0	1	1	1.3e-60	2.6e-59	201.8	0	2	212	343	564	342	576	0.92	80.2281
	Phvul.002G021100.4	-	578	Pkinase	PF00069.30	263	1.8e-59	202.3	0	1	1	1.3e-60	2.6e-59	201.8	0	2	212	343	564	342	576	0.92	80.2281
	Phvul.006G068400.1	-	798	Pkinase	PF00069.30	263	5.4e-46	158.1	0.1	1	1	3.6e-47	7.3e-46	157.7	0.1	2	212	491	718	490	774	0.79	80.2281
	Phvul.003G062600.1	-	651	Pkinase	PF00069.30	263	1.2e-45	157	0	1	1	1.1e-46	2.2e-45	156.1	0	2	212	326	541	325	600	0.83	80.2281
	Phvul.007G049500.1	-	669	Pkinase	PF00069.30	263	8.6e-43	147.6	0	1	1	6e-44	1.2e-42	147.1	0	2	212	338	549	337	606	0.78	80.2281
	Phvul.001G060600.1	-	779	Pkinase	PF00069.30	263	2.8e-40	139.4	0	1	1	3.1e-41	6.3e-40	138.2	0	2	212	464	678	463	724	0.85	80.2281
	Phvul.002G123500.1	-	1030	Pkinase	PF00069.30	263	9.2e-39	134.4	0	1	1	6.7e-40	1.4e-38	133.9	0	2	212	721	953	720	1021	0.78	80.2281
	Phvul.004G168800.2	-	426	Pkinase	PF00069.30	263	1e-27	98.2	0	1	1	6.5e-29	1.3e-27	97.8	0	2	212	10	227	9	258	0.86	80.2281
	Phvul.004G168800.1	-	432	Pkinase	PF00069.30	263	1.1e-27	98.1	0	1	1	6.7e-29	1.4e-27	97.8	0	2	212	10	227	9	258	0.86	80.2281
	Phvul.004G168800.3	-	432	Pkinase	PF00069.30	263	1.1e-27	98.1	0	1	1	6.7e-29	1.4e-27	97.8	0	2	212	10	227	9	258	0.86	80.2281
	Phvul.010G136500.1	-	479	Pkinase	PF00069.30	263	3.5e-26	93.2	0	1	1	2.5e-27	5.1e-26	92.6	0	2	212	10	227	9	263	0.82	80.2281
	Phvul.007G107800.1	-	460	Pkinase	PF00069.30	263	1.4e-25	91.2	0	1	1	8.7e-27	1.8e-25	90.9	0	2	212	10	227	9	262	0.84	80.2281
	Phvul.007G096600.1	-	422	Pkinase	PF00069.30	263	1.7e-20	74.5	0	1	1	1.4e-21	2.9e-20	73.8	0	44	254	141	388	123	393	0.81	80.2281
	Phvul.005G094900.1	-	805	Pkinase	PF00069.30	263	1.8e-52	179.4	0	1	1	1.4e-53	2.8e-52	178.7	0	3	212	551	762	549	798	0.89	79.8479
	Phvul.007G052500.1	-	665	Pkinase	PF00069.30	263	2.8e-45	155.8	0.2	1	1	2.8e-46	5.8e-45	154.8	0	2	211	334	544	333	602	0.79	79.8479
	Phvul.010G156500.1	-	365	Pkinase	PF00069.30	263	2.5e-41	142.8	0	1	1	1.5e-42	3.1e-41	142.5	0	2	211	39	253	38	309	0.79	79.8479
	Phvul.007G244300.2	-	623	Pkinase	PF00069.30	263	1.2e-38	134	0	1	1	9.5e-40	1.9e-38	133.4	0	1	210	30	253	30	279	0.88	79.8479
	Phvul.008G224900.2	-	977	Pkinase	PF00069.30	263	1.2e-37	130.7	0	1	1	8.1e-39	1.7e-37	130.3	0	3	212	680	910	678	965	0.85	79.8479
	Phvul.008G224900.1	-	1009	Pkinase	PF00069.30	263	1.3e-37	130.7	0	1	1	8.6e-39	1.8e-37	130.2	0	3	212	712	942	710	997	0.85	79.8479
	Phvul.008G225000.1	-	1014	Pkinase	PF00069.30	263	1.5e-37	130.5	0	1	1	9.8e-39	2e-37	130	0	3	212	712	942	710	978	0.87	79.8479
	Phvul.011G198200.1	-	372	Pkinase	PF00069.30	263	1.6e-30	107.4	4.6	2	2	1.1e-28	2.3e-27	97	0.3	49	258	105	312	105	315	0.74	79.8479
	Phvul.003G135100.1	-	455	Pkinase	PF00069.30	263	1.5e-26	94.4	0	1	1	9.5e-28	1.9e-26	94	0	2	211	10	226	9	254	0.84	79.8479
	Phvul.009G104800.2	-	398	Pkinase	PF00069.30	263	9e-44	150.8	0	1	1	1.1e-44	2.2e-43	149.6	0	1	209	66	299	66	346	0.86	79.4677
	Phvul.009G209200.1	-	1042	Pkinase	PF00069.30	263	1.5e-41	143.6	0.2	1	1	1e-42	2e-41	143.1	0.2	4	212	718	946	715	1013	0.83	79.4677
	Phvul.007G261200.1	-	374	Pkinase	PF00069.30	263	7.5e-37	128.1	0	1	1	4.5e-38	9.1e-37	127.9	0	4	212	75	296	72	349	0.82	79.4677
	Phvul.006G197000.1	-	594	Pkinase	PF00069.30	263	1.9e-22	80.9	0.1	1	1	2.1e-23	4.2e-22	79.8	0.1	4	212	294	500	291	557	0.84	79.4677
	Phvul.002G127800.1	-	1006	Pkinase	PF00069.30	263	3.5e-40	139.1	0	1	1	2.5e-41	5e-40	138.6	0	2	209	699	923	698	992	0.84	79.0875
	Phvul.001G090800.1	-	298	Pkinase	PF00069.30	263	1.9e-38	133.4	0	1	1	1.2e-39	2.5e-38	133	0	52	259	2	224	1	228	0.87	79.0875
	Phvul.001G090800.3	-	298	Pkinase	PF00069.30	263	1.9e-38	133.4	0	1	1	1.2e-39	2.5e-38	133	0	52	259	2	224	1	228	0.87	79.0875
	Phvul.007G072300.6	-	496	Pkinase	PF00069.30	263	3.4e-33	116.1	0.3	1	1	1.6e-33	3.2e-32	113	0	5	212	149	360	145	404	0.81	79.0875
	Phvul.007G072300.3	-	619	Pkinase	PF00069.30	263	6.1e-33	115.3	0.1	1	1	2.6e-33	5.3e-32	112.3	0	5	212	272	483	268	527	0.81	79.0875
	Phvul.007G072300.2	-	712	Pkinase	PF00069.30	263	9.6e-33	114.7	0.1	1	1	3.6e-33	7.3e-32	111.8	0	5	212	365	576	361	619	0.82	79.0875
	Phvul.009G108500.1	-	426	Pkinase	PF00069.30	263	1.1e-29	104.7	0	1	1	7.3e-31	1.5e-29	104.2	0	2	209	10	224	9	259	0.85	79.0875
	Phvul.011G159700.1	-	389	Pkinase	PF00069.30	263	1.3e-47	163.4	0	1	1	8.5e-49	1.7e-47	163	0	4	210	50	262	47	318	0.83	78.7072
	Phvul.011G150950.1	-	818	Pkinase	PF00069.30	263	2.2e-43	149.6	0	1	1	1.5e-44	3.1e-43	149.1	0	2	208	501	713	500	770	0.79	78.7072
	Phvul.008G093200.2	-	1029	Pkinase	PF00069.30	263	1.4e-41	143.6	0	1	1	1.1e-42	2.2e-41	143	0	5	211	710	935	706	976	0.83	78.7072
	Phvul.008G093200.3	-	1029	Pkinase	PF00069.30	263	1.4e-41	143.6	0	1	1	1.1e-42	2.2e-41	143	0	5	211	710	935	706	976	0.83	78.7072
	Phvul.008G093200.1	-	1069	Pkinase	PF00069.30	263	1.4e-41	143.6	0	1	1	1.2e-42	2.4e-41	142.9	0	5	211	750	975	746	1015	0.83	78.7072
	Phvul.004G109500.1	-	834	Pkinase	PF00069.30	263	1.5e-41	143.5	0	1	1	1.3e-42	2.6e-41	142.8	0	6	212	500	710	495	765	0.79	78.7072
	Phvul.007G072300.4	-	642	Pkinase	PF00069.30	263	6.4e-33	115.3	0.1	1	1	2.7e-33	5.6e-32	112.2	0	6	212	296	506	291	550	0.81	78.7072
	Phvul.007G072300.5	-	731	Pkinase	PF00069.30	263	9.7e-33	114.7	0.1	1	1	3.7e-33	7.5e-32	111.8	0	6	212	385	595	380	638	0.82	78.7072
	Phvul.007G072300.1	-	735	Pkinase	PF00069.30	263	9.9e-33	114.6	0.1	1	1	3.7e-33	7.6e-32	111.8	0	6	212	389	599	384	642	0.82	78.7072
	Phvul.008G258400.2	-	449	Pkinase	PF00069.30	263	9.2e-30	104.9	0	1	1	6.8e-31	1.4e-29	104.3	0	52	258	236	438	200	441	0.85	78.7072
	Phvul.008G258400.1	-	579	Pkinase	PF00069.30	263	1.6e-29	104.2	0	1	1	1.3e-30	2.6e-29	103.5	0	52	258	366	568	331	571	0.85	78.7072
	Phvul.009G230800.1	-	456	Pkinase	PF00069.30	263	2.5e-25	90.4	0	1	1	1.6e-26	3.2e-25	90	0	2	208	10	224	9	263	0.85	78.7072
	Phvul.011G176700.1	-	790	Pkinase	PF00069.30	263	4.8e-48	164.9	0	1	1	4.3e-49	8.8e-48	164	0	2	207	474	685	473	744	0.79	78.327
	Phvul.011G169332.3	-	1014	Pkinase	PF00069.30	263	5.5e-44	151.5	0	1	1	3.9e-45	8e-44	151	0	2	207	685	893	684	950	0.83	78.327
	Phvul.011G169332.5	-	1014	Pkinase	PF00069.30	263	5.5e-44	151.5	0	1	1	3.9e-45	8e-44	151	0	2	207	685	893	684	950	0.83	78.327
	Phvul.011G169332.4	-	1014	Pkinase	PF00069.30	263	5.6e-44	151.5	0	1	1	3.9e-45	8e-44	151	0	2	207	685	893	684	950	0.83	78.327
	Phvul.011G169332.1	-	1038	Pkinase	PF00069.30	263	5.8e-44	151.5	0	1	1	4.1e-45	8.4e-44	150.9	0	2	207	709	917	708	974	0.83	78.327
	Phvul.011G169332.2	-	1038	Pkinase	PF00069.30	263	5.8e-44	151.5	0	1	1	4.1e-45	8.4e-44	150.9	0	2	207	709	917	708	974	0.83	78.327
	Phvul.006G159100.1	-	498	Pkinase	PF00069.30	263	1.7e-39	136.8	0	1	1	1.2e-40	2.4e-39	136.4	0	2	207	177	386	176	469	0.83	78.327
	Phvul.007G244300.3	-	609	Pkinase	PF00069.30	263	1.4e-37	130.5	0	1	1	1.3e-38	2.6e-37	129.7	0	54	259	30	260	26	263	0.84	78.327
	Phvul.006G084600.1	-	646	Pkinase	PF00069.30	263	7.8e-48	164.2	0.1	1	1	5.4e-49	1.1e-47	163.7	0.1	2	206	326	535	325	598	0.82	77.9468
	Phvul.011G169300.1	-	1030	Pkinase	PF00069.30	263	2.9e-45	155.7	0	1	1	2e-46	4.2e-45	155.2	0	2	206	691	898	690	956	0.81	77.9468
	Phvul.001G173600.1	-	355	Pkinase	PF00069.30	263	3.4e-45	155.5	0	1	1	3.1e-46	6.4e-45	154.6	0	4	208	52	264	49	323	0.85	77.9468
	Phvul.002G123200.1	-	1021	Pkinase	PF00069.30	263	2e-40	139.9	0	1	1	1.3e-41	2.7e-40	139.4	0	5	209	711	936	707	1005	0.78	77.9468
	Phvul.010G064900.1	-	713	Pkinase	PF00069.30	263	8e-31	108.4	0	1	1	5.3e-32	1.1e-30	108	0	6	210	421	645	417	706	0.86	77.9468
	Phvul.008G083700.2	-	283	Pkinase	PF00069.30	263	1.2e-51	176.7	0	1	1	7.6e-53	1.6e-51	176.3	0	4	207	54	268	52	281	0.91	77.5665
	Phvul.008G083700.4	-	283	Pkinase	PF00069.30	263	1.2e-51	176.7	0	1	1	7.6e-53	1.6e-51	176.3	0	4	207	54	268	52	281	0.91	77.5665
	Phvul.006G087700.1	-	678	Pkinase	PF00069.30	263	5.1e-47	161.5	0	1	1	3.8e-48	7.7e-47	160.9	0	3	206	351	557	349	622	0.83	77.5665
	Phvul.002G063700.1	-	649	Pkinase	PF00069.30	263	8.5e-46	157.5	0	1	1	6.4e-47	1.3e-45	156.9	0	1	204	323	531	323	597	0.89	77.5665
	Phvul.002G063700.2	-	649	Pkinase	PF00069.30	263	8.5e-46	157.5	0	1	1	6.4e-47	1.3e-45	156.9	0	1	204	323	531	323	597	0.89	77.5665
	Phvul.007G048600.1	-	683	Pkinase	PF00069.30	263	1.8e-45	156.4	0	1	1	1.2e-46	2.5e-45	156	0	2	205	352	561	351	620	0.85	77.5665
	Phvul.006G162400.1	-	513	Pkinase	PF00069.30	263	1.8e-45	156.4	0	1	1	1.2e-46	2.4e-45	156	0	6	209	98	307	93	370	0.84	77.5665
	Phvul.002G177200.1	-	935	Pkinase	PF00069.30	263	2.1e-45	156.2	0.2	1	1	1.6e-46	3.3e-45	155.5	0.2	4	207	610	818	608	876	0.79	77.5665
	Phvul.006G187700.1	-	372	Pkinase	PF00069.30	263	2.9e-45	155.7	0	1	1	1.8e-46	3.6e-45	155.4	0	1	204	56	265	56	326	0.89	77.5665
	Phvul.006G187700.2	-	372	Pkinase	PF00069.30	263	2.9e-45	155.7	0	1	1	1.8e-46	3.6e-45	155.4	0	1	204	56	265	56	326	0.89	77.5665
	Phvul.007G154500.1	-	727	Pkinase	PF00069.30	263	1.4e-44	153.5	0	1	1	9.8e-46	2e-44	153	0	2	205	341	550	340	616	0.82	77.5665
	Phvul.001G071300.1	-	594	Pkinase	PF00069.30	263	9.6e-43	147.5	0	1	1	6.8e-44	1.4e-42	146.9	0	2	205	290	502	289	560	0.82	77.5665
	Phvul.008G239600.1	-	699	Pkinase	PF00069.30	263	7.9e-50	170.7	0	1	1	5.6e-51	1.2e-49	170.2	0	2	204	370	574	369	642	0.84	77.1863
	Phvul.008G077500.2	-	873	Pkinase	PF00069.30	263	1.6e-47	163.2	0.4	1	1	1.2e-48	2.4e-47	162.5	0.4	2	204	548	756	547	817	0.89	77.1863
	Phvul.008G077500.1	-	918	Pkinase	PF00069.30	263	1.7e-47	163.1	0.4	1	1	1.3e-48	2.7e-47	162.4	0.4	2	204	593	801	592	862	0.89	77.1863
	Phvul.007G049400.1	-	672	Pkinase	PF00069.30	263	6e-47	161.2	0	1	1	4.5e-48	9.1e-47	160.7	0	2	204	346	554	345	614	0.78	77.1863
	Phvul.005G078500.1	-	998	Pkinase	PF00069.30	263	1.3e-46	160.1	0	1	1	1.2e-47	2.3e-46	159.3	0	2	204	665	873	664	934	0.84	77.1863
	Phvul.011G175700.2	-	770	Pkinase	PF00069.30	263	3.8e-46	158.6	0	1	1	2.8e-47	5.7e-46	158.1	0	2	204	469	677	468	738	0.83	77.1863
	Phvul.011G175700.1	-	771	Pkinase	PF00069.30	263	4.4e-46	158.4	0	1	1	3.2e-47	6.6e-46	157.8	0	2	204	469	678	468	739	0.83	77.1863
	Phvul.005G079733.2	-	796	Pkinase	PF00069.30	263	2.6e-45	155.9	0	1	1	1.9e-46	3.9e-45	155.3	0	2	204	579	787	578	793	0.9	77.1863
	Phvul.005G079733.1	-	821	Pkinase	PF00069.30	263	2.8e-45	155.8	0	1	1	2e-46	4.1e-45	155.2	0	2	204	604	812	603	818	0.9	77.1863
	Phvul.007G049100.1	-	673	Pkinase	PF00069.30	263	3.8e-45	155.3	0	1	1	3.1e-46	6.3e-45	154.6	0	2	204	342	550	341	609	0.84	77.1863
	Phvul.007G049600.1	-	685	Pkinase	PF00069.30	263	1.2e-44	153.7	0.1	1	1	1.9e-45	3.9e-44	152	0	2	204	354	562	353	622	0.8	77.1863
	Phvul.007G162300.1	-	382	Pkinase	PF00069.30	263	1.2e-44	153.7	0	1	1	1.4e-45	2.8e-44	152.5	0	5	207	81	291	77	350	0.84	77.1863
	Phvul.005G159200.4	-	661	Pkinase	PF00069.30	263	1.7e-44	153.2	0	1	1	1.2e-45	2.4e-44	152.7	0	2	204	376	585	375	648	0.81	77.1863
	Phvul.008G126800.1	-	863	Pkinase	PF00069.30	263	1.9e-44	153.1	0	1	1	1.6e-45	3.3e-44	152.3	0	1	203	545	753	545	815	0.87	77.1863
	Phvul.005G159200.3	-	725	Pkinase	PF00069.30	263	2.1e-44	152.9	0	1	1	1.4e-45	2.9e-44	152.4	0	2	204	440	649	439	712	0.81	77.1863
	Phvul.006G194500.1	-	849	Pkinase	PF00069.30	263	2.1e-44	152.9	0	1	1	1.4e-45	2.9e-44	152.4	0	2	204	535	745	534	802	0.82	77.1863
	Phvul.005G159200.1	-	745	Pkinase	PF00069.30	263	2.2e-44	152.9	0	1	1	1.5e-45	3.1e-44	152.4	0	2	204	460	669	459	732	0.81	77.1863
	Phvul.005G159200.2	-	745	Pkinase	PF00069.30	263	2.2e-44	152.9	0	1	1	1.5e-45	3.1e-44	152.4	0	2	204	460	669	459	732	0.81	77.1863
	Phvul.007G048900.1	-	671	Pkinase	PF00069.30	263	2.5e-44	152.7	0	1	1	1.9e-45	3.9e-44	152	0	2	204	340	548	339	608	0.81	77.1863
	Phvul.003G158600.1	-	777	Pkinase	PF00069.30	263	3.6e-44	152.2	0	1	1	2.6e-45	5.3e-44	151.6	0	2	204	458	666	457	727	0.85	77.1863
	Phvul.002G219900.1	-	837	Pkinase	PF00069.30	263	5.1e-44	151.7	0	1	1	3.5e-45	7.2e-44	151.2	0	2	204	521	729	520	788	0.85	77.1863
	Phvul.009G106200.1	-	664	Pkinase	PF00069.30	263	1.5e-43	150.1	0	1	1	9.4e-45	1.9e-43	149.8	0	2	204	310	519	309	581	0.85	77.1863
	Phvul.005G185701.1	-	508	Pkinase	PF00069.30	263	7.1e-43	147.9	0	1	1	7.8e-43	1.6e-41	143.5	0	2	204	182	390	181	446	0.82	77.1863
	Phvul.001G071100.1	-	615	Pkinase	PF00069.30	263	1.4e-42	146.9	0	1	1	8.9e-44	1.8e-42	146.6	0	3	205	291	502	289	562	0.81	77.1863
	Phvul.009G024200.1	-	619	Pkinase	PF00069.30	263	1.7e-42	146.6	0	1	1	1.2e-43	2.3e-42	146.2	0	2	204	264	470	263	499	0.89	77.1863
	Phvul.011G070500.1	-	416	Pkinase	PF00069.30	263	5e-41	141.9	0	1	1	3.7e-42	7.6e-41	141.2	0	6	208	99	309	94	368	0.84	77.1863
	Phvul.003G149100.2	-	605	Pkinase	PF00069.30	263	8.3e-40	137.8	0	1	1	6.7e-41	1.4e-39	137.1	0	1	203	295	503	295	549	0.9	77.1863
	Phvul.003G149100.1	-	606	Pkinase	PF00069.30	263	8.3e-40	137.8	0	1	1	6.7e-41	1.4e-39	137.1	0	1	203	296	504	296	550	0.9	77.1863
	Phvul.009G240100.1	-	371	Pkinase	PF00069.30	263	4.6e-39	135.4	0	1	1	2.8e-40	5.6e-39	135.1	0	3	205	59	267	57	325	0.85	77.1863
	Phvul.006G095700.1	-	419	Pkinase	PF00069.30	263	2.6e-37	129.7	0	1	1	1.6e-38	3.3e-37	129.3	0	2	204	129	336	128	391	0.88	77.1863
	Phvul.010G165200.2	-	625	Pkinase	PF00069.30	263	1.9e-36	126.8	0	1	1	1.5e-37	3.1e-36	126.1	0	4	206	345	548	342	613	0.87	77.1863
	Phvul.010G165200.1	-	689	Pkinase	PF00069.30	263	2.5e-36	126.5	0	1	1	1.9e-37	3.8e-36	125.9	0	4	206	409	612	406	677	0.87	77.1863
	Phvul.005G078100.10	-	850	Pkinase	PF00069.30	263	5.2e-46	158.2	0	1	1	4.2e-47	8.5e-46	157.5	0	2	203	504	711	503	774	0.84	76.8061
	Phvul.005G078100.9	-	873	Pkinase	PF00069.30	263	5.5e-46	158.1	0	1	1	4.4e-47	9e-46	157.4	0	2	203	527	734	526	797	0.84	76.8061
	Phvul.007G077300.1	-	864	Pkinase	PF00069.30	263	5.7e-46	158.1	0	1	1	5e-47	1e-45	157.2	0	4	205	535	743	532	803	0.81	76.8061
	Phvul.005G078100.7	-	902	Pkinase	PF00069.30	263	5.8e-46	158	0	1	1	4.7e-47	9.5e-46	157.3	0	2	203	556	763	555	826	0.84	76.8061
	Phvul.005G078100.6	-	925	Pkinase	PF00069.30	263	6.1e-46	157.9	0	1	1	4.9e-47	1e-45	157.3	0	2	203	579	786	578	849	0.84	76.8061
	Phvul.005G078100.5	-	927	Pkinase	PF00069.30	263	6.2e-46	157.9	0	1	1	4.9e-47	1e-45	157.2	0	2	203	581	788	580	851	0.84	76.8061
	Phvul.005G078100.4	-	950	Pkinase	PF00069.30	263	6.5e-46	157.9	0	1	1	5.1e-47	1e-45	157.2	0	2	203	604	811	603	874	0.84	76.8061
	Phvul.005G078100.3	-	979	Pkinase	PF00069.30	263	6.8e-46	157.8	0	1	1	5.4e-47	1.1e-45	157.1	0	2	203	633	840	632	903	0.84	76.8061
	Phvul.005G078100.2	-	1002	Pkinase	PF00069.30	263	7.1e-46	157.7	0	1	1	5.6e-47	1.1e-45	157.1	0	2	203	656	863	655	926	0.84	76.8061
	Phvul.007G048800.1	-	670	Pkinase	PF00069.30	263	1.9e-45	156.3	0	1	1	1.6e-46	3.2e-45	155.6	0	3	204	340	547	338	607	0.8	76.8061
	Phvul.011G147100.1	-	815	Pkinase	PF00069.30	263	5e-45	155	0	1	1	3.6e-46	7.3e-45	154.4	0	2	203	499	708	498	768	0.79	76.8061
	Phvul.010G138900.1	-	857	Pkinase	PF00069.30	263	3.9e-44	152	0	1	1	2.7e-45	5.6e-44	151.5	0	3	204	468	676	466	739	0.8	76.8061
	Phvul.003G252900.1	-	588	Pkinase	PF00069.30	263	1.1e-43	150.6	0	1	1	8.1e-45	1.7e-43	150	0	3	204	246	451	244	465	0.9	76.8061
	Phvul.003G252900.2	-	588	Pkinase	PF00069.30	263	1.1e-43	150.6	0	1	1	8.1e-45	1.7e-43	150	0	3	204	246	451	244	465	0.9	76.8061
	Phvul.005G120300.1	-	959	Pkinase	PF00069.30	263	1.1e-43	150.5	0	1	1	7.6e-45	1.5e-43	150.1	0	3	204	614	824	612	887	0.82	76.8061
	Phvul.007G188300.1	-	862	Pkinase	PF00069.30	263	7e-43	147.9	0	1	1	4.7e-44	9.6e-43	147.5	0	3	204	522	730	520	791	0.81	76.8061
	Phvul.001G146900.1	-	640	Pkinase	PF00069.30	263	2.9e-42	145.9	0	1	1	1.9e-43	3.9e-42	145.5	0	3	204	297	507	295	569	0.8	76.8061
	Phvul.008G082500.1	-	968	Pkinase	PF00069.30	263	2e-41	143.2	0	1	1	1.3e-42	2.6e-41	142.8	0	2	203	686	892	685	953	0.87	76.8061
	Phvul.001G146800.1	-	403	Pkinase	PF00069.30	263	1.3e-40	140.5	0	1	1	8.2e-42	1.7e-40	140.1	0	3	204	112	317	110	374	0.82	76.8061
	Phvul.003G144200.1	-	379	Pkinase	PF00069.30	263	9.9e-40	137.6	0	1	1	6e-41	1.2e-39	137.3	0	3	204	65	272	63	330	0.84	76.8061
	Phvul.007G004200.1	-	364	Pkinase	PF00069.30	263	6.5e-39	134.9	0	1	1	3.6e-40	7.4e-39	134.7	0	4	205	74	288	71	348	0.86	76.8061
	Phvul.007G004200.2	-	364	Pkinase	PF00069.30	263	6.5e-39	134.9	0	1	1	3.6e-40	7.4e-39	134.7	0	4	205	74	288	71	348	0.86	76.8061
	Phvul.007G004200.3	-	404	Pkinase	PF00069.30	263	8.6e-39	134.5	0	1	1	4.9e-40	1e-38	134.3	0	4	205	114	328	111	388	0.86	76.8061
	Phvul.001G073501.1	-	430	Pkinase	PF00069.30	263	1.9e-21	77.6	0	1	1	1.4e-22	2.9e-21	77.1	0	18	219	34	236	26	282	0.83	76.8061
	Phvul.008G058600.2	-	672	Pkinase	PF00069.30	263	1.2e-45	157	0	1	1	8.4e-47	1.7e-45	156.5	0	2	202	343	549	342	610	0.84	76.4259
	Phvul.008G058600.3	-	672	Pkinase	PF00069.30	263	1.2e-45	157	0	1	1	8.4e-47	1.7e-45	156.5	0	2	202	343	549	342	610	0.84	76.4259
	Phvul.008G058600.6	-	672	Pkinase	PF00069.30	263	1.2e-45	157	0	1	1	8.4e-47	1.7e-45	156.5	0	2	202	343	549	342	610	0.84	76.4259
	Phvul.008G058600.1	-	673	Pkinase	PF00069.30	263	1.2e-45	157	0	1	1	8.4e-47	1.7e-45	156.5	0	2	202	344	550	343	611	0.84	76.4259
	Phvul.008G058600.4	-	673	Pkinase	PF00069.30	263	1.2e-45	157	0	1	1	8.4e-47	1.7e-45	156.5	0	2	202	344	550	343	611	0.84	76.4259
	Phvul.008G058600.5	-	673	Pkinase	PF00069.30	263	1.2e-45	157	0	1	1	8.4e-47	1.7e-45	156.5	0	2	202	344	550	343	611	0.84	76.4259
	Phvul.007G051100.1	-	647	Pkinase	PF00069.30	263	5.2e-45	154.9	1.1	1	1	3.4e-46	7e-45	154.5	1.1	2	202	333	538	332	602	0.86	76.4259
	Phvul.008G164300.1	-	879	Pkinase	PF00069.30	263	5.8e-44	151.5	0	1	1	4.8e-45	9.8e-44	150.7	0	5	205	583	788	580	845	0.86	76.4259
	Phvul.004G039200.1	-	744	Pkinase	PF00069.30	263	4.9e-43	148.4	0	1	1	1.2e-43	2.4e-42	146.2	0	6	206	501	708	496	723	0.91	76.4259
	Phvul.004G164000.1	-	663	Pkinase	PF00069.30	263	6.9e-43	147.9	0	1	1	4.7e-44	9.6e-43	147.5	0	4	204	293	495	290	560	0.86	76.4259
	Phvul.004G011000.1	-	670	Pkinase	PF00069.30	263	8.9e-43	147.6	0	1	1	1e-43	2.1e-42	146.4	0	4	204	335	540	332	598	0.85	76.4259
	Phvul.009G155000.1	-	697	Pkinase	PF00069.30	263	1.1e-42	147.3	0	1	1	1.1e-43	2.2e-42	146.3	0	4	204	356	561	353	621	0.88	76.4259
	Phvul.007G074000.1	-	844	Pkinase	PF00069.30	263	2.5e-42	146.1	0	1	1	1.8e-43	3.7e-42	145.5	0	4	204	507	713	504	772	0.84	76.4259
	Phvul.007G074000.2	-	844	Pkinase	PF00069.30	263	2.5e-42	146.1	0	1	1	1.8e-43	3.7e-42	145.5	0	4	204	507	713	504	772	0.84	76.4259
	Phvul.007G078200.1	-	678	Pkinase	PF00069.30	263	4e-42	145.4	0	1	1	2.6e-43	5.4e-42	145	0	2	202	356	565	355	625	0.85	76.4259
	Phvul.002G232600.1	-	999	Pkinase	PF00069.30	263	1.1e-41	144	0	1	1	7.1e-43	1.5e-41	143.6	0	4	204	689	907	686	965	0.86	76.4259
	Phvul.007G183000.2	-	411	Pkinase	PF00069.30	263	1.6e-41	143.5	0	1	1	1.2e-42	2.5e-41	142.8	0	3	203	94	299	92	319	0.92	76.4259
	Phvul.009G043600.1	-	954	Pkinase	PF00069.30	263	2.1e-41	143.1	0	1	1	1.4e-42	2.8e-41	142.7	0	4	204	674	879	671	939	0.84	76.4259
	Phvul.009G043600.3	-	954	Pkinase	PF00069.30	263	2.1e-41	143.1	0	1	1	1.4e-42	2.8e-41	142.7	0	4	204	674	879	671	939	0.84	76.4259
	Phvul.009G043600.2	-	978	Pkinase	PF00069.30	263	2.2e-41	143	0	1	1	1.4e-42	2.9e-41	142.6	0	4	204	698	903	695	963	0.84	76.4259
	Phvul.008G081000.1	-	899	Pkinase	PF00069.30	263	1.2e-40	140.6	0	1	1	9.8e-42	2e-40	139.9	0	6	206	546	752	541	812	0.79	76.4259
	Phvul.001G134600.3	-	858	Pkinase	PF00069.30	263	1e-23	85.1	0	1	1	7.3e-25	1.5e-23	84.6	0	4	204	580	788	577	852	0.77	76.4259
	Phvul.001G134600.1	-	887	Pkinase	PF00069.30	263	1.1e-23	85	0	1	1	7.8e-25	1.6e-23	84.5	0	4	204	609	817	606	881	0.77	76.4259
	Phvul.001G134600.2	-	887	Pkinase	PF00069.30	263	1.1e-23	85	0	1	1	7.8e-25	1.6e-23	84.5	0	4	204	609	817	606	881	0.77	76.4259
	Phvul.001G003300.2	-	283	Pkinase	PF00069.30	263	8.1e-64	216.6	0	1	1	5e-65	1e-63	216.2	0	1	200	73	276	73	282	0.96	76.0456
	Phvul.005G079100.1	-	1010	Pkinase	PF00069.30	263	3e-47	162.2	0	1	1	2.3e-48	4.6e-47	161.6	0	4	203	672	877	669	939	0.8	76.0456
	Phvul.005G077900.1	-	618	Pkinase	PF00069.30	263	2e-46	159.6	0.1	1	1	1.5e-47	3e-46	159	0.1	5	204	279	484	275	545	0.79	76.0456
	Phvul.008G021001.1	-	432	Pkinase	PF00069.30	263	3.3e-45	155.5	0	1	1	2.1e-46	4.2e-45	155.2	0	3	202	86	289	84	357	0.83	76.0456
	Phvul.010G082800.1	-	614	Pkinase	PF00069.30	263	2.4e-44	152.7	0.1	1	1	1.7e-45	3.5e-44	152.2	0.1	5	204	387	593	383	611	0.89	76.0456
	Phvul.002G007800.1	-	974	Pkinase	PF00069.30	263	3e-44	152.4	0	1	1	1.9e-45	3.9e-44	152	0	3	202	681	889	679	966	0.88	76.0456
	Phvul.004G173300.1	-	896	Pkinase	PF00069.30	263	3.3e-43	149	0	1	1	2.5e-44	5.1e-43	148.4	0	4	203	572	790	570	849	0.87	76.0456
	Phvul.002G070900.1	-	695	Pkinase	PF00069.30	263	3.8e-43	148.8	0	1	1	2.5e-44	5.2e-43	148.4	0	2	201	347	550	346	618	0.8	76.0456
	Phvul.001G067700.1	-	742	Pkinase	PF00069.30	263	7.2e-43	147.9	0	1	1	5.4e-44	1.1e-42	147.3	0	5	204	400	605	396	665	0.86	76.0456
	Phvul.002G029200.1	-	631	Pkinase	PF00069.30	263	2e-42	146.5	0	1	1	1.3e-43	2.5e-42	146.1	0	3	202	291	494	289	558	0.9	76.0456
	Phvul.002G029200.2	-	631	Pkinase	PF00069.30	263	2e-42	146.5	0	1	1	1.3e-43	2.5e-42	146.1	0	3	202	291	494	289	558	0.9	76.0456
	Phvul.005G085600.1	-	840	Pkinase	PF00069.30	263	8.2e-42	144.4	0	1	1	6e-43	1.2e-41	143.9	0	5	204	503	707	499	768	0.78	76.0456
	Phvul.005G085600.2	-	840	Pkinase	PF00069.30	263	8.2e-42	144.4	0	1	1	6e-43	1.2e-41	143.9	0	5	204	503	707	499	768	0.78	76.0456
	Phvul.011G035600.1	-	657	Pkinase	PF00069.30	263	1.7e-40	140.1	0	1	1	1.1e-41	2.3e-40	139.7	0	3	202	317	517	315	579	0.91	76.0456
	Phvul.011G035600.2	-	657	Pkinase	PF00069.30	263	1.7e-40	140.1	0	1	1	1.1e-41	2.3e-40	139.7	0	3	202	317	517	315	579	0.91	76.0456
	Phvul.007G245500.6	-	612	Pkinase	PF00069.30	263	1.4e-51	176.4	0	1	1	1.2e-52	2.4e-51	175.7	0	4	202	395	597	392	605	0.94	75.6654
	Phvul.001G163800.1	-	1229	Pkinase	PF00069.30	263	9.7e-46	157.3	0	1	1	6.7e-47	1.4e-45	156.8	0	4	202	932	1139	929	1203	0.82	75.6654
	Phvul.001G163700.1	-	1239	Pkinase	PF00069.30	263	1.5e-45	156.6	0	1	1	1.1e-46	2.2e-45	156.1	0	4	202	937	1144	934	1208	0.8	75.6654
	Phvul.005G094300.1	-	397	Pkinase	PF00069.30	263	1.6e-43	150	0	1	1	1.4e-44	2.8e-43	149.3	0	2	200	91	299	90	366	0.86	75.6654
	Phvul.006G215500.1	-	651	Pkinase	PF00069.30	263	5.5e-43	148.3	0	1	1	3.5e-44	7e-43	147.9	0	3	201	316	532	314	604	0.88	75.6654
	Phvul.008G156400.1	-	664	Pkinase	PF00069.30	263	3.5e-42	145.6	0	1	1	2.4e-43	4.9e-42	145.2	0	2	200	327	532	326	593	0.85	75.6654
	Phvul.007G210500.1	-	361	Pkinase	PF00069.30	263	2.7e-41	142.7	0	1	1	1.5e-42	3.2e-41	142.5	0	4	202	72	281	69	343	0.87	75.6654
	Phvul.011G070500.2	-	317	Pkinase	PF00069.30	263	8.2e-41	141.1	0	1	1	5.1e-42	1e-40	140.8	0	6	204	99	305	94	313	0.92	75.6654
	Phvul.011G070500.3	-	317	Pkinase	PF00069.30	263	8.2e-41	141.1	0	1	1	5.1e-42	1e-40	140.8	0	6	204	99	305	94	313	0.92	75.6654
	Phvul.011G070500.4	-	317	Pkinase	PF00069.30	263	8.2e-41	141.1	0	1	1	5.1e-42	1e-40	140.8	0	6	204	99	305	94	313	0.92	75.6654
	Phvul.011G147100.2	-	803	Pkinase	PF00069.30	263	2.3e-38	133.1	0	1	1	2e-38	4e-37	129.1	0	5	203	502	696	498	756	0.74	75.6654
	Phvul.009G145400.4	-	423	Pkinase	PF00069.30	263	1.3e-59	202.7	0	2	2	6.9e-54	1.4e-52	179.7	0	66	263	54	241	49	241	0.91	75.2852
	Phvul.009G145400.3	-	425	Pkinase	PF00069.30	263	1.4e-59	202.7	0	2	2	7e-54	1.4e-52	179.7	0	66	263	54	241	49	241	0.91	75.2852
	Phvul.007G078800.4	-	486	Pkinase	PF00069.30	263	5.2e-57	194.2	0.1	1	1	3.7e-58	7.4e-57	193.7	0.1	3	200	274	470	272	485	0.94	75.2852
	Phvul.007G078800.3	-	503	Pkinase	PF00069.30	263	5.6e-57	194.1	0.1	1	1	4e-58	8.1e-57	193.6	0.1	3	200	291	487	289	502	0.94	75.2852
	Phvul.002G063900.1	-	649	Pkinase	PF00069.30	263	3.8e-47	161.9	0	1	1	2.8e-48	5.7e-47	161.3	0	1	198	323	525	323	597	0.87	75.2852
	Phvul.010G149300.1	-	566	Pkinase	PF00069.30	263	7.4e-46	157.7	0	1	1	4.6e-47	9.5e-46	157.3	0	3	200	204	405	202	473	0.89	75.2852
	Phvul.005G078100.8	-	901	Pkinase	PF00069.30	263	9.7e-46	157.3	0	1	1	7.6e-47	1.6e-45	156.6	0	2	199	656	859	655	877	0.89	75.2852
	Phvul.002G227300.1	-	367	Pkinase	PF00069.30	263	1.3e-45	156.9	0	1	1	7.6e-47	1.5e-45	156.6	0	1	198	47	250	47	315	0.93	75.2852
	Phvul.002G227300.2	-	367	Pkinase	PF00069.30	263	1.3e-45	156.9	0	1	1	7.6e-47	1.5e-45	156.6	0	1	198	47	250	47	315	0.93	75.2852
	Phvul.008G127374.1	-	843	Pkinase	PF00069.30	263	2e-45	156.2	0	1	1	1.6e-46	3.2e-45	155.6	0	1	198	526	729	526	797	0.83	75.2852
	Phvul.008G001400.1	-	474	Pkinase	PF00069.30	263	2.7e-45	155.9	0	1	1	1.7e-46	3.5e-45	155.5	0	5	202	103	308	99	378	0.89	75.2852
	Phvul.007G000800.2	-	471	Pkinase	PF00069.30	263	8.8e-45	154.2	0	1	1	5.7e-46	1.2e-44	153.7	0	4	201	104	309	101	381	0.89	75.2852
	Phvul.007G000800.1	-	472	Pkinase	PF00069.30	263	8.8e-45	154.2	0	1	1	5.8e-46	1.2e-44	153.7	0	4	201	105	310	102	382	0.89	75.2852
	Phvul.003G187200.1	-	1094	Pkinase	PF00069.30	263	5.9e-44	151.5	0	1	1	4.2e-45	8.5e-44	150.9	0	2	199	802	1005	801	1078	0.8	75.2852
	Phvul.006G194100.1	-	819	Pkinase	PF00069.30	263	1.9e-43	149.8	0	1	1	1.4e-44	2.8e-43	149.2	0	1	198	500	703	500	770	0.87	75.2852
	Phvul.002G143400.1	-	919	Pkinase	PF00069.30	263	9.1e-42	144.3	0	1	1	7.1e-43	1.4e-41	143.6	0	4	201	593	797	591	859	0.9	75.2852
	Phvul.002G251400.1	-	1018	Pkinase	PF00069.30	263	9.3e-40	137.7	0	1	1	1.1e-40	2.2e-39	136.5	0	2	199	704	919	703	996	0.79	75.2852
	Phvul.010G043600.1	-	857	Pkinase	PF00069.30	263	8.8e-68	229.6	0	1	2	2.1e-41	4.3e-40	138.8	0	2	198	125	350	124	417	0.9	74.9049
	Phvul.002G091900.2	-	381	Pkinase	PF00069.30	263	4.1e-54	184.8	0	1	1	2.6e-55	5.3e-54	184.4	0	5	201	150	354	146	376	0.92	74.9049
	Phvul.005G078400.2	-	1026	Pkinase	PF00069.30	263	1.2e-47	163.5	0	1	1	9.2e-49	1.9e-47	162.9	0	2	198	688	890	687	959	0.88	74.9049
	Phvul.005G078400.1	-	1030	Pkinase	PF00069.30	263	1.3e-47	163.5	0	1	1	9.2e-49	1.9e-47	162.9	0	2	198	692	894	691	963	0.88	74.9049
	Phvul.001G234200.1	-	664	Pkinase	PF00069.30	263	6.2e-46	157.9	0	1	1	4.7e-47	9.5e-46	157.3	0	2	198	351	552	350	619	0.89	74.9049
	Phvul.011G175000.1	-	807	Pkinase	PF00069.30	263	2.6e-45	155.9	0	1	1	2.1e-46	4.3e-45	155.2	0	2	198	489	690	488	757	0.84	74.9049
	Phvul.011G168400.2	-	720	Pkinase	PF00069.30	263	7.6e-45	154.4	0	1	1	5.5e-46	1.1e-44	153.8	0	2	198	500	704	499	719	0.87	74.9049
	Phvul.008G127237.1	-	457	Pkinase	PF00069.30	263	6.4e-44	151.3	0	1	1	4.2e-45	8.5e-44	150.9	0	2	198	140	342	139	408	0.89	74.9049
	Phvul.011G194600.1	-	629	Pkinase	PF00069.30	263	1.2e-43	150.4	0	1	1	8.9e-45	1.8e-43	149.8	0	2	198	311	514	310	580	0.82	74.9049
	Phvul.010G015800.1	-	686	Pkinase	PF00069.30	263	5.4e-43	148.3	0	1	1	3.4e-44	6.9e-43	148	0	2	198	347	548	346	612	0.93	74.9049
	Phvul.007G049000.2	-	649	Pkinase	PF00069.30	263	9.1e-43	147.6	0	1	1	6.7e-44	1.4e-42	147	0	2	198	318	520	317	585	0.84	74.9049
	Phvul.007G049000.1	-	685	Pkinase	PF00069.30	263	1e-42	147.4	0	1	1	7.5e-44	1.5e-42	146.8	0	2	198	354	556	353	621	0.84	74.9049
	Phvul.006G181800.2	-	1001	Pkinase	PF00069.30	263	7.7e-42	144.5	0	1	1	5.1e-43	1e-41	144.1	0	4	200	690	905	687	963	0.88	74.9049
	Phvul.001G216800.2	-	337	Pkinase	PF00069.30	263	7.8e-41	141.2	0	1	1	4.9e-42	1e-40	140.9	0	4	200	72	279	69	302	0.89	74.9049
	Phvul.001G216800.1	-	361	Pkinase	PF00069.30	263	8.2e-41	141.1	0	1	1	4.8e-42	9.7e-41	140.9	0	4	200	72	279	69	341	0.89	74.9049
	Phvul.001G216800.3	-	361	Pkinase	PF00069.30	263	8.2e-41	141.1	0	1	1	4.8e-42	9.7e-41	140.9	0	4	200	72	279	69	341	0.89	74.9049
	Phvul.001G216800.4	-	361	Pkinase	PF00069.30	263	8.2e-41	141.1	0	1	1	4.8e-42	9.7e-41	140.9	0	4	200	72	279	69	341	0.89	74.9049
	Phvul.002G215100.1	-	1004	Pkinase	PF00069.30	263	2.8e-38	132.8	0	1	1	2.1e-39	4.2e-38	132.3	0	2	198	702	916	701	992	0.83	74.9049
	Phvul.002G326800.8	-	219	Pkinase	PF00069.30	263	2.5e-62	211.6	0	1	1	1.5e-63	3.1e-62	211.4	0	3	198	16	213	14	216	0.96	74.5247
	Phvul.002G326800.9	-	219	Pkinase	PF00069.30	263	2.5e-62	211.6	0	1	1	1.5e-63	3.1e-62	211.4	0	3	198	16	213	14	216	0.96	74.5247
	Phvul.009G257000.1	-	354	Pkinase	PF00069.30	263	5.7e-54	184.3	0	1	1	3.8e-55	7.8e-54	183.8	0	68	263	2	187	1	187	0.95	74.5247
	Phvul.008G077800.1	-	664	Pkinase	PF00069.30	263	9.8e-47	160.5	0.1	1	1	8.6e-48	1.7e-46	159.7	0.1	3	198	346	547	344	615	0.84	74.5247
	Phvul.005G167700.1	-	780	Pkinase	PF00069.30	263	1e-46	160.5	0	1	1	7.3e-48	1.5e-46	160	0	3	198	464	665	462	731	0.85	74.5247
	Phvul.005G077400.1	-	617	Pkinase	PF00069.30	263	4.8e-46	158.3	0	1	1	3.9e-47	8e-46	157.6	0	4	199	277	478	274	545	0.8	74.5247
	Phvul.008G127100.1	-	840	Pkinase	PF00069.30	263	1.2e-45	156.9	0	1	1	9.1e-47	1.9e-45	156.4	0	1	196	522	723	522	778	0.93	74.5247
	Phvul.001G233100.1	-	745	Pkinase	PF00069.30	263	1.8e-45	156.4	0.1	1	1	1.3e-46	2.6e-45	155.9	0.1	3	198	440	641	438	702	0.9	74.5247
	Phvul.002G063600.2	-	543	Pkinase	PF00069.30	263	3.1e-45	155.6	0	1	1	2.2e-46	4.6e-45	155.1	0	2	197	324	523	323	537	0.92	74.5247
	Phvul.007G049900.5	-	444	Pkinase	PF00069.30	263	1.8e-44	153.1	0	1	1	1.2e-45	2.4e-44	152.8	0	3	198	116	317	114	383	0.83	74.5247
	Phvul.003G158700.1	-	768	Pkinase	PF00069.30	263	2.3e-44	152.8	0	1	1	1.6e-45	3.2e-44	152.3	0	2	197	451	652	450	718	0.87	74.5247
	Phvul.008G105300.3	-	293	Pkinase	PF00069.30	263	3.7e-44	152.1	0	1	1	2.3e-45	4.7e-44	151.8	0	2	197	45	246	44	259	0.91	74.5247
	Phvul.011G041400.1	-	981	Pkinase	PF00069.30	263	1.2e-41	143.9	0	1	1	9.1e-43	1.9e-41	143.2	0	2	197	666	867	665	934	0.86	74.5247
	Phvul.003G052300.2	-	463	Pkinase	PF00069.30	263	3.8e-41	142.2	0	1	1	2.5e-42	5e-41	141.8	0	5	200	195	391	191	454	0.8	74.5247
	Phvul.011G042000.1	-	1008	Pkinase	PF00069.30	263	2.5e-40	139.6	0	1	1	1.9e-41	3.8e-40	139	0	3	198	715	916	713	939	0.92	74.5247
	Phvul.011G151900.1	-	800	Pkinase	PF00069.30	263	9.6e-40	137.6	0	1	1	7.8e-41	1.6e-39	136.9	0	3	198	479	676	477	743	0.85	74.5247
	Phvul.007G181600.1	-	441	Pkinase	PF00069.30	263	1.3e-39	137.2	0	1	1	7.9e-41	1.6e-39	136.9	0	5	200	146	348	142	415	0.84	74.5247
	Phvul.008G281500.3	-	831	Pkinase	PF00069.30	263	2.2e-38	133.2	0	1	1	1.6e-39	3.3e-38	132.6	0	4	199	524	727	521	795	0.8	74.5247
	Phvul.004G039501.1	-	500	Pkinase	PF00069.30	263	9.9e-37	127.8	0	1	1	1.3e-37	2.6e-36	126.4	0	5	200	191	409	187	473	0.82	74.5247
	Phvul.008G106600.1	-	681	Pkinase	PF00069.30	263	2.9e-24	86.9	0.2	1	1	2.5e-25	5e-24	86.1	0.2	2	197	439	634	438	667	0.92	74.5247
	Phvul.009G122600.1	-	859	Pkinase	PF00069.30	263	1.4e-48	166.6	0	1	1	1.3e-49	2.7e-48	165.7	0	4	198	504	701	502	773	0.92	74.1445
	Phvul.004G043800.2	-	326	Pkinase	PF00069.30	263	2.5e-48	165.8	0.1	1	1	1.9e-49	3.8e-48	165.2	0.1	5	199	121	316	118	325	0.94	74.1445
	Phvul.004G043800.5	-	326	Pkinase	PF00069.30	263	2.5e-48	165.8	0.1	1	1	1.9e-49	3.8e-48	165.2	0.1	5	199	121	316	118	325	0.94	74.1445
	Phvul.005G077600.1	-	614	Pkinase	PF00069.30	263	8e-47	160.8	0	1	1	6.8e-48	1.4e-46	160.1	0	5	199	278	478	274	544	0.79	74.1445
	Phvul.011G175200.1	-	812	Pkinase	PF00069.30	263	8.5e-46	157.5	0	1	1	6.9e-47	1.4e-45	156.8	0	3	197	488	687	486	755	0.87	74.1445
	Phvul.011G196200.1	-	671	Pkinase	PF00069.30	263	2.2e-45	156.2	0	1	1	1.5e-46	3e-45	155.7	0	2	196	354	554	353	623	0.82	74.1445
	Phvul.002G049301.1	-	551	Pkinase	PF00069.30	263	2.7e-44	152.6	0	1	1	2e-45	4.1e-44	152	0	2	196	238	438	237	506	0.9	74.1445
	Phvul.004G037500.2	-	543	Pkinase	PF00069.30	263	1.1e-43	150.5	0	1	1	7.5e-45	1.5e-43	150.1	0	4	198	267	465	264	534	0.84	74.1445
	Phvul.006G194600.1	-	841	Pkinase	PF00069.30	263	3.5e-43	148.9	0	1	1	2.5e-44	5.1e-43	148.4	0	2	196	523	723	522	792	0.82	74.1445
	Phvul.L003081.1	-	837	Pkinase	PF00069.30	263	1.9e-42	146.5	0	1	1	1.3e-43	2.7e-42	146	0	6	200	502	701	497	766	0.81	74.1445
	Phvul.001G083300.1	-	1055	Pkinase	PF00069.30	263	2e-42	146.4	0	1	1	1.4e-43	2.9e-42	145.9	0	3	197	781	979	779	1047	0.92	74.1445
	Phvul.007G030300.1	-	607	Pkinase	PF00069.30	263	3.8e-42	145.5	0	1	1	2.9e-43	5.9e-42	144.9	0	5	199	324	529	321	574	0.83	74.1445
	Phvul.004G037600.3	-	959	Pkinase	PF00069.30	263	4e-42	145.5	0	1	1	2.7e-43	5.5e-42	145	0	4	198	683	881	680	950	0.84	74.1445
	Phvul.004G037600.2	-	1016	Pkinase	PF00069.30	263	4.4e-42	145.3	0	1	1	3e-43	6.1e-42	144.8	0	4	198	740	938	737	1007	0.84	74.1445
	Phvul.005G110900.1	-	984	Pkinase	PF00069.30	263	3.2e-41	142.5	0	1	1	2.6e-42	5.3e-41	141.8	0	2	196	669	869	668	937	0.87	74.1445
	Phvul.005G110900.2	-	985	Pkinase	PF00069.30	263	3.6e-41	142.3	0	1	1	2.6e-42	5.3e-41	141.8	0	2	196	670	870	669	938	0.87	74.1445
	Phvul.002G249500.1	-	664	Pkinase	PF00069.30	263	5.3e-40	138.5	0	1	1	3.7e-41	7.6e-40	138	0	5	199	345	556	341	581	0.9	74.1445
	Phvul.008G093000.1	-	707	Pkinase	PF00069.30	263	4.3e-31	109.3	0	1	1	2.9e-32	6e-31	108.8	0	6	200	415	631	411	700	0.84	74.1445
	Phvul.009G103100.1	-	623	Pkinase	PF00069.30	263	3.6e-26	93.1	0	1	1	2.8e-27	5.6e-26	92.5	0	5	199	327	521	324	590	0.84	74.1445
	Phvul.007G050300.1	-	1072	Pkinase	PF00069.30	263	3.1e-61	208.1	1.9	1	3	1.2e-44	2.5e-43	149.4	0.4	2	195	339	534	338	594	0.91	73.7643
	Phvul.011G169600.1	-	393	Pkinase	PF00069.30	263	7.4e-47	160.9	0	1	1	4.2e-48	8.5e-47	160.8	0	2	195	48	247	47	316	0.92	73.7643
	Phvul.011G152700.1	-	777	Pkinase	PF00069.30	263	1.5e-44	153.4	0	1	1	1.2e-45	2.3e-44	152.8	0	2	195	464	662	463	725	0.92	73.7643
	Phvul.011G150100.1	-	772	Pkinase	PF00069.30	263	2.2e-44	152.9	0	1	1	1.5e-45	3.2e-44	152.3	0	2	195	454	653	453	721	0.91	73.7643
	Phvul.011G156200.1	-	793	Pkinase	PF00069.30	263	3.7e-44	152.1	0	1	1	3.7e-45	7.5e-44	151.1	0	2	195	476	675	475	743	0.88	73.7643
	Phvul.004G156110.1	-	387	Pkinase	PF00069.30	263	1.2e-43	150.4	0	1	1	7.8e-45	1.6e-43	150	0	2	195	52	251	51	264	0.9	73.7643
	Phvul.011G194700.1	-	641	Pkinase	PF00069.30	263	2.5e-43	149.4	0	1	1	1.8e-44	3.8e-43	148.8	0	5	198	326	526	322	592	0.84	73.7643
	Phvul.011G150400.1	-	818	Pkinase	PF00069.30	263	4.1e-43	148.7	0	1	1	2.7e-44	5.6e-43	148.2	0	2	195	502	701	501	765	0.92	73.7643
	Phvul.008G156400.2	-	557	Pkinase	PF00069.30	263	4.4e-42	145.3	0	1	1	3.1e-43	6.3e-42	144.8	0	2	195	327	525	326	547	0.9	73.7643
	Phvul.002G270000.3	-	554	Pkinase	PF00069.30	263	3.4e-39	135.8	0	1	1	3.2e-40	6.5e-39	134.9	0	70	263	18	202	11	202	0.91	73.7643
	Phvul.001G243500.2	-	489	Pkinase	PF00069.30	263	7.8e-31	108.4	0	1	1	5.8e-32	1.2e-30	107.8	0	2	195	200	389	199	460	0.86	73.7643
	Phvul.001G243700.1	-	411	Pkinase	PF00069.30	263	1.1e-22	81.7	0	1	1	1.7e-23	3.5e-22	80.1	0	2	195	145	334	144	397	0.88	73.7643
	Phvul.006G174700.1	-	690	Pkinase	PF00069.30	263	9.1e-15	55.8	0	1	1	1.8e-13	3.7e-12	47.2	0	5	198	411	617	407	679	0.74	73.7643
	Phvul.002G267300.2	-	378	Pkinase	PF00069.30	263	8.6e-49	167.3	0	1	1	5.9e-50	1.2e-48	166.8	0	71	263	3	213	1	213	0.87	73.384
	Phvul.003G137700.2	-	429	Pkinase	PF00069.30	263	8.7e-46	157.4	0	1	1	5.8e-47	1.2e-45	157	0	4	196	117	314	114	386	0.77	73.384
	Phvul.003G137700.1	-	448	Pkinase	PF00069.30	263	9.8e-46	157.3	0	1	1	6.6e-47	1.3e-45	156.8	0	4	196	136	333	133	405	0.77	73.384
	Phvul.011G193300.2	-	558	Pkinase	PF00069.30	263	1.7e-44	153.2	0	1	1	1.2e-45	2.5e-44	152.6	0	2	194	326	524	325	538	0.92	73.384
	Phvul.011G007800.1	-	756	Pkinase	PF00069.30	263	1.8e-44	153.1	0	1	1	1.2e-45	2.5e-44	152.7	0	6	198	521	721	516	753	0.89	73.384
	Phvul.001G233000.1	-	752	Pkinase	PF00069.30	263	3.7e-44	152.1	0	1	1	2.6e-45	5.3e-44	151.6	0	3	195	444	642	442	706	0.91	73.384
	Phvul.011G069600.1	-	837	Pkinase	PF00069.30	263	1.6e-42	146.7	0	1	1	1.2e-43	2.4e-42	146.1	0	6	198	502	699	497	766	0.84	73.384
	Phvul.011G152300.3	-	623	Pkinase	PF00069.30	263	2.3e-42	146.2	0	1	1	1.5e-43	3e-42	145.8	0	3	195	335	533	333	599	0.92	73.384
	Phvul.011G152300.2	-	786	Pkinase	PF00069.30	263	3.3e-42	145.7	0	1	1	2.4e-43	4.8e-42	145.2	0	3	195	498	696	496	762	0.92	73.384
	Phvul.011G152300.1	-	787	Pkinase	PF00069.30	263	3.3e-42	145.7	0	1	1	2.4e-43	4.8e-42	145.2	0	3	195	499	697	497	763	0.92	73.384
	Phvul.011G152400.1	-	819	Pkinase	PF00069.30	263	4.9e-41	141.9	0	1	1	3.8e-42	7.8e-41	141.2	0	2	194	503	701	502	712	0.92	73.384
	Phvul.008G158100.1	-	644	Pkinase	PF00069.30	263	1.8e-24	87.6	0	1	1	1.3e-25	2.6e-24	87	0	6	198	342	534	338	558	0.92	73.384
	Phvul.006G181600.1	-	334	Pkinase	PF00069.30	263	6.3e-24	85.8	0	1	1	3.8e-25	7.7e-24	85.5	0	2	194	64	260	63	321	0.88	73.384
	Phvul.010G100400.1	-	827	Pkinase	PF00069.30	263	8.2e-46	157.5	0	1	1	7.5e-47	1.5e-45	156.6	0	4	195	479	672	477	684	0.93	73.0038
	Phvul.005G088000.2	-	652	Pkinase	PF00069.30	263	2.1e-44	152.9	0	1	1	1.5e-45	3e-44	152.4	0	4	195	341	538	338	554	0.92	73.0038
	Phvul.011G125900.1	-	534	Pkinase	PF00069.30	263	5.1e-12	46.8	0	1	1	8.9e-13	1.8e-11	45	0	7	198	235	452	229	534	0.73	73.0038
	Phvul.006G076200.2	-	395	Pkinase	PF00069.30	263	8e-49	167.4	0	1	1	5.6e-50	1.1e-48	166.9	0	73	263	18	199	5	199	0.9	72.6236
	Phvul.006G076200.3	-	395	Pkinase	PF00069.30	263	8e-49	167.4	0	1	1	5.6e-50	1.1e-48	166.9	0	73	263	18	199	5	199	0.9	72.6236
	Phvul.008G207200.3	-	723	Pkinase	PF00069.30	263	4.8e-24	86.2	0	1	1	3.8e-25	7.7e-24	85.5	0	5	195	438	639	435	670	0.88	72.6236
	Phvul.008G207200.2	-	832	Pkinase	PF00069.30	263	6.2e-24	85.8	0	1	1	4.9e-25	1e-23	85.1	0	5	195	547	748	544	777	0.88	72.6236
	Phvul.005G013200.2	-	530	Pkinase	PF00069.30	263	2.5e-43	149.4	0.1	1	1	1.1e-43	2.3e-42	146.2	0	6	195	319	507	314	516	0.93	72.2433
	Phvul.003G134500.3	-	753	Pkinase	PF00069.30	263	1.5e-38	133.7	0.3	1	1	7.6e-39	1.6e-37	130.4	0	6	195	404	600	399	653	0.91	72.2433
	Phvul.003G134500.1	-	763	Pkinase	PF00069.30	263	1.6e-38	133.7	0.3	1	1	7.8e-39	1.6e-37	130.4	0	6	195	414	610	409	663	0.91	72.2433
	Phvul.003G134500.2	-	763	Pkinase	PF00069.30	263	1.6e-38	133.7	0.3	1	1	7.8e-39	1.6e-37	130.4	0	6	195	414	610	409	663	0.91	72.2433
	Phvul.006G127700.1	-	1061	Pkinase	PF00069.30	263	2.8e-24	86.9	0	1	1	2.1e-25	4.3e-24	86.3	0	5	194	783	982	780	1017	0.9	72.2433
	Phvul.006G127700.2	-	1061	Pkinase	PF00069.30	263	2.8e-24	86.9	0	1	1	2.1e-25	4.3e-24	86.3	0	5	194	783	982	780	1017	0.9	72.2433
	Phvul.002G186600.1	-	322	Pkinase	PF00069.30	263	1.2e-46	160.2	0	1	2	7.4e-40	1.5e-38	133.7	0	3	191	5	198	3	205	0.87	71.8631
	Phvul.009G239700.1	-	380	Pkinase	PF00069.30	263	7.2e-42	144.6	0	1	1	4.4e-43	9e-42	144.3	0	6	194	95	288	91	360	0.91	71.8631
	Phvul.002G270000.2	-	532	Pkinase	PF00069.30	263	6.4e-38	131.7	0	1	1	5.8e-39	1.2e-37	130.8	0	75	263	1	180	1	180	0.92	71.8631
	Phvul.002G270000.4	-	532	Pkinase	PF00069.30	263	6.4e-38	131.7	0	1	1	5.8e-39	1.2e-37	130.8	0	75	263	1	180	1	180	0.92	71.8631
	Phvul.008G028600.1	-	375	Pkinase	PF00069.30	263	8.8e-27	95.2	0	1	2	2e-26	4.1e-25	89.7	0	2	190	89	283	88	292	0.89	71.8631
	Phvul.001G096600.2	-	255	Pkinase	PF00069.30	263	3.2e-38	132.6	0	1	1	2e-39	4e-38	132.3	0	73	260	1	188	1	190	0.91	71.4829
	Phvul.002G021600.3	-	266	Pkinase	PF00069.30	263	5.8e-50	171.1	0	1	1	4.2e-51	8.5e-50	170.6	0	77	263	1	184	1	184	0.95	71.1027
	Phvul.006G080800.2	-	233	Pkinase	PF00069.30	263	1.2e-49	170	0	1	1	8.8e-51	1.8e-49	169.5	0	77	263	1	183	1	183	0.89	71.1027
	Phvul.008G044701.1	-	221	Pkinase	PF00069.30	263	4.7e-27	96.1	0	1	1	2.8e-28	5.7e-27	95.8	0	73	257	1	187	1	192	0.84	70.3422
	Phvul.008G044701.2	-	221	Pkinase	PF00069.30	263	4.7e-27	96.1	0	1	1	2.8e-28	5.7e-27	95.8	0	73	257	1	187	1	192	0.84	70.3422
	Phvul.008G044701.3	-	221	Pkinase	PF00069.30	263	4.7e-27	96.1	0	1	1	2.8e-28	5.7e-27	95.8	0	73	257	1	187	1	192	0.84	70.3422
	Phvul.001G069300.1	-	298	Pkinase	PF00069.30	263	9.8e-38	131	0	1	1	8.1e-39	1.6e-37	130.3	0	4	185	105	294	103	298	0.92	69.2015
	Phvul.002G124200.1	-	395	Pkinase	PF00069.30	263	1.9e-30	107.2	0	1	1	1.2e-31	2.4e-30	106.8	0	23	204	96	293	87	347	0.8	69.2015
	Phvul.010G077634.1	-	793	Pkinase	PF00069.30	263	1.9e-06	28.5	0	1	1	1.5e-07	3.1e-06	27.8	0	17	198	38	242	36	295	0.81	69.2015
	Phvul.L001848.3	-	892	Pkinase	PF00069.30	263	1.1e-47	163.6	0	1	1	1.3e-48	2.7e-47	162.4	0	4	184	655	869	652	871	0.97	68.8213
	Phvul.L001848.4	-	892	Pkinase	PF00069.30	263	1.1e-47	163.6	0	1	1	1.3e-48	2.7e-47	162.4	0	4	184	655	869	652	871	0.97	68.8213
	Phvul.002G326800.7	-	284	Pkinase	PF00069.30	263	3.3e-45	155.5	0	1	1	1.9e-46	3.9e-45	155.3	0	83	263	3	202	1	202	0.91	68.8213
	Phvul.002G326800.6	-	294	Pkinase	PF00069.30	263	3.6e-45	155.4	0	1	1	2.1e-46	4.3e-45	155.2	0	83	263	3	202	1	202	0.91	68.8213
	Phvul.005G078100.11	-	849	Pkinase	PF00069.30	263	4e-37	129.1	0	1	1	2.9e-38	5.9e-37	128.5	0	2	182	656	843	655	849	0.88	68.8213
	Phvul.005G078100.12	-	849	Pkinase	PF00069.30	263	4e-37	129.1	0	1	1	2.9e-38	5.9e-37	128.5	0	2	182	656	843	655	849	0.88	68.8213
	Phvul.009G208500.1	-	958	Pkinase	PF00069.30	263	2.5e-15	57.6	0.8	1	1	2.7e-16	5.4e-15	56.5	0	33	211	722	893	704	942	0.7	68.0608
	Phvul.008G055600.1	-	796	Pkinase	PF00069.30	263	9.2e-06	26.3	0	1	1	7.1e-07	1.4e-05	25.6	0	18	196	39	240	35	302	0.84	68.0608
	Phvul.008G029866.1	-	230	Pkinase	PF00069.30	263	7.7e-26	92.1	0	1	1	4.8e-27	9.8e-26	91.7	0	80	257	1	179	1	184	0.85	67.6806
	Phvul.008G028400.2	-	191	Pkinase	PF00069.30	263	3.8e-16	60.3	0	1	1	2.2e-17	4.4e-16	60.1	0	80	257	1	181	1	187	0.83	67.6806
	Phvul.008G029800.1	-	275	Pkinase	PF00069.30	263	3e-25	90.1	0	1	1	2e-26	4.1e-25	89.7	0	82	258	3	193	1	196	0.79	67.3004
	Phvul.002G021600.2	-	324	Pkinase	PF00069.30	263	5.4e-56	190.9	0	1	2	8.2e-51	1.7e-49	169.6	0	1	175	21	194	21	198	0.94	66.5399
	Phvul.006G020900.10	-	416	Pkinase	PF00069.30	263	2.7e-59	201.7	0	2	2	1.5e-45	3.1e-44	152.4	0	92	263	81	244	77	244	0.88	65.3992
	Phvul.006G020900.11	-	416	Pkinase	PF00069.30	263	2.7e-59	201.7	0	2	2	1.5e-45	3.1e-44	152.4	0	92	263	81	244	77	244	0.88	65.3992
	Phvul.006G020900.12	-	416	Pkinase	PF00069.30	263	2.7e-59	201.7	0	2	2	1.5e-45	3.1e-44	152.4	0	92	263	81	244	77	244	0.88	65.3992
	Phvul.003G165700.3	-	407	Pkinase	PF00069.30	263	4.6e-52	178	0	2	2	8.5e-46	1.7e-44	153.2	0	92	263	64	225	54	225	0.89	65.3992
	Phvul.007G174700.1	-	1071	Pkinase	PF00069.30	263	9.4e-27	95.1	0	2	2	8.9e-26	1.8e-24	87.6	0	94	263	812	1065	747	1065	0.77	64.6388
	Phvul.007G174700.2	-	1071	Pkinase	PF00069.30	263	9.4e-27	95.1	0	2	2	8.9e-26	1.8e-24	87.6	0	94	263	812	1065	747	1065	0.77	64.6388
	Phvul.005G163400.1	-	250	Pkinase	PF00069.30	263	2.2e-27	97.1	0	1	1	1.4e-28	2.9e-27	96.7	0	90	258	25	208	3	211	0.83	64.2586
	Phvul.001G043001.1	-	666	Pkinase	PF00069.30	263	4.3e-28	99.4	0.7	1	1	6.3e-29	1.3e-27	97.9	0	91	258	423	596	378	598	0.81	63.8783
	Phvul.001G043001.2	-	626	Pkinase	PF00069.30	263	4.5e-28	99.4	0.7	1	1	5.6e-29	1.1e-27	98.1	0	91	258	383	556	337	558	0.81	63.8783
	Phvul.003G027300.1	-	579	Pkinase	PF00069.30	263	4.3e-24	86.3	0	1	2	7e-20	1.4e-18	68.2	0	2	168	151	344	150	359	0.72	63.4981
	Phvul.009G083300.3	-	279	Pkinase	PF00069.30	263	5.2e-32	112.3	0	1	1	3.4e-33	7e-32	111.9	0	4	169	84	261	81	269	0.87	63.1179
	Phvul.009G020600.4	-	465	Pkinase	PF00069.30	263	1e-44	154	0	1	1	7.5e-46	1.5e-44	153.4	0	4	168	289	452	286	459	0.96	62.7376
	Phvul.008G081300.1	-	498	Pkinase	PF00069.30	263	1e-23	85.1	0.1	2	2	7.7e-22	1.6e-20	74.6	0	99	263	289	482	255	482	0.81	62.7376
	Phvul.008G081300.2	-	498	Pkinase	PF00069.30	263	1e-23	85.1	0.1	2	2	7.7e-22	1.6e-20	74.6	0	99	263	289	482	255	482	0.81	62.7376
	Phvul.009G053500.1	-	677	Pkinase	PF00069.30	263	1.9e-06	28.5	0.6	1	1	1.3e-06	2.7e-05	24.7	0.6	99	263	237	404	115	404	0.83	62.7376
	Phvul.002G040600.1	-	413	Pkinase	PF00069.30	263	6.4e-05	23.5	0	1	1	6.1e-06	0.00012	22.5	0	99	263	221	408	182	408	0.73	62.7376
	Phvul.005G030900.1	-	687	Pkinase	PF00069.30	263	1e-34	121.2	0	1	1	7.3e-36	1.5e-34	120.6	0	3	165	502	670	500	680	0.92	61.9772
	Phvul.011G119200.1	-	531	Pkinase	PF00069.30	263	7.1e-31	108.6	0.1	1	1	4.9e-32	1e-30	108.1	0.1	3	165	353	520	351	521	0.92	61.9772
	Phvul.002G159500.2	-	326	Pkinase	PF00069.30	263	1.3e-56	193	0	2	2	1.8e-47	3.6e-46	158.7	0	103	263	98	278	96	278	0.89	61.2167
	Phvul.002G017700.2	-	383	Pkinase	PF00069.30	263	5.7e-33	115.4	0	1	1	3.7e-34	7.5e-33	115	0	4	163	175	340	172	343	0.9	60.8365
	Phvul.011G152200.3	-	792	Pkinase	PF00069.30	263	7.1e-31	108.6	0	1	1	6.6e-32	1.3e-30	107.7	0	2	161	508	673	507	698	0.89	60.8365
	Phvul.003G090000.2	-	874	Pkinase	PF00069.30	263	5.1e-34	118.9	0	1	1	3.9e-35	7.9e-34	118.2	0	2	160	633	796	632	809	0.91	60.4563
	Phvul.011G175301.2	-	625	Pkinase	PF00069.30	263	7.3e-33	115.1	0	1	1	6.4e-34	1.3e-32	114.3	0	2	160	461	624	460	625	0.9	60.4563
	Phvul.011G175301.1	-	644	Pkinase	PF00069.30	263	7.8e-33	115	0	1	1	6.7e-34	1.4e-32	114.2	0	2	160	480	643	479	644	0.9	60.4563
	Phvul.011G151800.2	-	659	Pkinase	PF00069.30	263	5.6e-32	112.2	0	1	1	4.1e-33	8.3e-32	111.6	0	2	160	495	659	494	659	0.89	60.4563
	Phvul.005G088700.2	-	798	Pkinase	PF00069.30	263	7.5e-32	111.8	0.2	1	1	1.9e-32	3.8e-31	109.4	0	2	160	502	666	501	669	0.89	60.4563
	Phvul.002G116200.1	-	245	Pkinase	PF00069.30	263	2.1e-20	74.3	0	1	1	3.9e-20	7.9e-19	69.1	0	44	202	34	182	22	231	0.87	60.4563
	Phvul.008G182800.2	-	852	Pkinase	PF00069.30	263	6.8e-35	121.7	0	1	1	6.9e-36	1.4e-34	120.7	0	3	159	676	836	674	840	0.91	59.6958
	Phvul.001G173600.2	-	259	Pkinase	PF00069.30	263	1.6e-34	120.5	0	1	1	1.7e-35	3.4e-34	119.4	0	52	208	2	168	1	226	0.82	59.6958
	Phvul.001G173600.3	-	259	Pkinase	PF00069.30	263	1.6e-34	120.5	0	1	1	1.7e-35	3.4e-34	119.4	0	52	208	2	168	1	226	0.82	59.6958
	Phvul.001G173600.4	-	259	Pkinase	PF00069.30	263	1.6e-34	120.5	0	1	1	1.7e-35	3.4e-34	119.4	0	52	208	2	168	1	226	0.82	59.6958
	Phvul.011G193300.1	-	490	Pkinase	PF00069.30	263	5.1e-33	115.6	0	1	1	3.4e-34	7e-33	115.2	0	2	158	326	488	325	490	0.88	59.6958
	Phvul.006G170500.5	-	836	Pkinase	PF00069.30	263	6e-32	112.1	0	1	1	4.3e-33	8.8e-32	111.5	0	3	159	669	831	667	834	0.88	59.6958
	Phvul.008G188700.1	-	677	Pkinase	PF00069.30	263	6.7e-20	72.6	0	1	1	2e-20	4e-19	70	0	2	158	391	548	390	642	0.95	59.6958
	Phvul.008G134800.1	-	430	Pkinase	PF00069.30	263	9.1e-57	193.4	0	1	2	3.8e-32	7.7e-31	108.4	0	3	158	29	192	27	198	0.9	59.3156
	Phvul.004G027400.1	-	244	Pkinase	PF00069.30	263	1.5e-23	84.6	0	1	1	9.6e-25	1.9e-23	84.2	0	105	260	7	168	2	172	0.82	59.3156
	Phvul.L010343.1	-	378	Pkinase	PF00069.30	263	1.4e-56	192.8	0	1	2	2.1e-34	4.2e-33	115.9	0	3	156	12	165	10	171	0.93	58.5551
	Phvul.007G103900.1	-	471	Pkinase	PF00069.30	263	3.7e-52	178.3	0	1	2	6.2e-33	1.3e-31	111	0	3	156	104	261	102	267	0.9	58.5551
	Phvul.004G027200.1	-	257	Pkinase	PF00069.30	263	4.7e-23	82.9	0	1	1	3e-24	6.2e-23	82.5	0	106	259	6	171	1	173	0.83	58.5551
	Phvul.011G090900.1	-	445	Pkinase	PF00069.30	263	1.2e-54	186.5	0	1	2	1.5e-33	3e-32	113.1	0	4	156	79	236	76	244	0.91	58.1749
	Phvul.002G312000.1	-	409	Pkinase	PF00069.30	263	1.6e-54	186.1	0	1	2	2.6e-34	5.3e-33	115.5	0	1	153	22	172	22	183	0.89	58.1749
	Phvul.002G312000.2	-	409	Pkinase	PF00069.30	263	1.6e-54	186.1	0	1	2	2.6e-34	5.3e-33	115.5	0	1	153	22	172	22	183	0.89	58.1749
	Phvul.005G079733.4	-	743	Pkinase	PF00069.30	263	1.5e-33	117.3	0	1	1	1e-34	2.1e-33	116.9	0	2	153	579	734	578	743	0.88	57.7947
	Phvul.005G079733.3	-	768	Pkinase	PF00069.30	263	1.6e-33	117.2	0	1	1	1.1e-34	2.2e-33	116.8	0	2	153	604	759	603	768	0.88	57.7947
	Phvul.010G030100.1	-	417	Pkinase	PF00069.30	263	5e-58	197.6	0	1	2	1.5e-33	3.1e-32	113	0	3	153	19	180	17	191	0.89	57.4144
	Phvul.004G165900.1	-	437	Pkinase	PF00069.30	263	8.3e-52	177.2	0	1	2	3.4e-30	7e-29	102	0	1	151	20	163	20	172	0.92	57.4144
	Phvul.010G046800.2	-	952	Pkinase	PF00069.30	263	2.6e-44	152.6	0	1	2	2.3e-23	4.7e-22	79.6	0.1	3	153	457	602	455	616	0.88	57.4144
	Phvul.010G046800.3	-	952	Pkinase	PF00069.30	263	2.6e-44	152.6	0	1	2	2.3e-23	4.7e-22	79.6	0.1	3	153	457	602	455	616	0.88	57.4144
	Phvul.010G046800.1	-	953	Pkinase	PF00069.30	263	2.6e-44	152.6	0	1	2	2.3e-23	4.7e-22	79.6	0.1	3	153	458	603	456	617	0.88	57.4144
	Phvul.010G046800.4	-	953	Pkinase	PF00069.30	263	2.6e-44	152.6	0	1	2	2.3e-23	4.7e-22	79.6	0.1	3	153	458	603	456	617	0.88	57.4144
	Phvul.008G154000.1	-	640	Pkinase	PF00069.30	263	2.4e-60	205.2	0	1	2	1.8e-37	3.7e-36	125.9	0	2	151	260	412	259	427	0.92	57.0342
	Phvul.004G006600.1	-	609	Pkinase	PF00069.30	263	2.2e-59	202	0	1	2	4.3e-37	8.8e-36	124.6	0	2	151	230	382	229	400	0.93	57.0342
	Phvul.005G043800.1	-	564	Pkinase	PF00069.30	263	2.2e-59	202	0	1	2	2.1e-37	4.3e-36	125.7	0	2	151	171	323	170	335	0.94	57.0342
	Phvul.011G152100.3	-	669	Pkinase	PF00069.30	263	2.3e-31	110.2	0	1	1	1.6e-32	3.3e-31	109.7	0	3	152	507	658	505	669	0.88	57.0342
	Phvul.007G107900.1	-	545	Pkinase	PF00069.30	263	3.7e-65	221	0.4	1	2	5.2e-43	1.1e-41	144.1	0.1	3	151	119	268	117	279	0.95	56.654
	Phvul.007G107900.2	-	545	Pkinase	PF00069.30	263	3.7e-65	221	0.4	1	2	5.2e-43	1.1e-41	144.1	0.1	3	151	119	268	117	279	0.95	56.654
	Phvul.007G191400.1	-	552	Pkinase	PF00069.30	263	7.2e-63	213.4	4.7	1	2	3.1e-42	6.4e-41	141.5	0.2	2	150	122	271	121	288	0.95	56.654
	Phvul.007G191400.2	-	552	Pkinase	PF00069.30	263	7.2e-63	213.4	4.7	1	2	3.1e-42	6.4e-41	141.5	0.2	2	150	122	271	121	288	0.95	56.654
	Phvul.007G191400.3	-	552	Pkinase	PF00069.30	263	7.2e-63	213.4	4.7	1	2	3.1e-42	6.4e-41	141.5	0.2	2	150	122	271	121	288	0.95	56.654
	Phvul.011G057900.1	-	421	Pkinase	PF00069.30	263	4.3e-59	201.1	0	1	2	2.4e-37	4.8e-36	125.5	0	3	151	25	177	23	186	0.93	56.654
	Phvul.006G136500.1	-	612	Pkinase	PF00069.30	263	7.2e-59	200.3	0	1	2	5.6e-37	1.1e-35	124.3	0	2	150	217	368	216	380	0.93	56.654
	Phvul.006G136500.2	-	612	Pkinase	PF00069.30	263	7.2e-59	200.3	0	1	2	5.6e-37	1.1e-35	124.3	0	2	150	217	368	216	380	0.93	56.654
	Phvul.001G172200.1	-	346	Pkinase	PF00069.30	263	3.4e-31	109.6	0	1	1	3.2e-32	6.6e-31	108.7	0	3	151	184	330	182	340	0.93	56.654
	Phvul.011G180600.1	-	470	Pkinase	PF00069.30	263	1.7e-60	205.6	0	1	2	9.8e-38	2e-36	126.8	0	2	149	80	230	79	243	0.93	56.2738
	Phvul.007G222100.1	-	864	Pkinase	PF00069.30	263	2.9e-58	198.4	0	1	2	1.2e-36	2.5e-35	123.1	0	2	149	480	630	479	642	0.92	56.2738
	Phvul.004G122500.2	-	487	Pkinase	PF00069.30	263	8.1e-57	193.6	0	1	2	4.2e-43	8.6e-42	144.4	0	2	149	43	195	42	197	0.96	56.2738
	Phvul.004G124400.1	-	664	Pkinase	PF00069.30	263	1e-31	111.4	0	1	2	6.2e-24	1.3e-22	81.5	0	4	151	83	234	81	246	0.89	56.2738
	Phvul.007G274600.1	-	545	Pkinase	PF00069.30	263	1.6e-65	222.2	0.5	1	2	4.2e-43	8.6e-42	144.4	0.2	3	149	119	266	117	278	0.95	55.8935
	Phvul.007G274600.2	-	545	Pkinase	PF00069.30	263	1.6e-65	222.2	0.5	1	2	4.2e-43	8.6e-42	144.4	0.2	3	149	119	266	117	278	0.95	55.8935
	Phvul.009G079700.1	-	507	Pkinase	PF00069.30	263	5.2e-65	220.5	0.2	1	2	3.6e-44	7.4e-43	147.8	0.2	2	148	94	241	93	249	0.97	55.8935
	Phvul.003G148600.2	-	451	Pkinase	PF00069.30	263	3e-62	211.4	2.8	1	2	7.9e-49	1.6e-47	163.1	2.4	1	147	10	157	10	161	0.97	55.8935
	Phvul.005G003300.1	-	827	Pkinase	PF00069.30	263	5.6e-60	204	0	1	2	3.2e-37	6.5e-36	125.1	0	2	148	443	592	442	604	0.93	55.8935
	Phvul.005G003300.2	-	827	Pkinase	PF00069.30	263	5.6e-60	204	0	1	2	3.2e-37	6.5e-36	125.1	0	2	148	443	592	442	604	0.93	55.8935
	Phvul.008G046900.1	-	761	Pkinase	PF00069.30	263	3.4e-58	198.1	0	1	2	2.7e-37	5.5e-36	125.3	0	2	148	367	516	366	531	0.94	55.8935
	Phvul.010G050000.1	-	764	Pkinase	PF00069.30	263	3.5e-58	198.1	0	1	2	4.9e-37	1e-35	124.5	0	2	148	367	516	366	532	0.93	55.8935
	Phvul.007G064200.1	-	537	Pkinase	PF00069.30	263	1.2e-34	121	0	1	2	1.2e-24	2.5e-23	83.8	0	4	150	72	221	70	232	0.87	55.8935
	Phvul.001G188100.1	-	872	Pkinase	PF00069.30	263	1.9e-59	202.2	0	1	2	5.4e-36	1.1e-34	121.1	0	2	147	490	638	489	651	0.92	55.5133
	Phvul.001G188100.2	-	872	Pkinase	PF00069.30	263	1.9e-59	202.2	0	1	2	5.4e-36	1.1e-34	121.1	0	2	147	490	638	489	651	0.92	55.5133
	Phvul.001G188100.3	-	872	Pkinase	PF00069.30	263	1.9e-59	202.2	0	1	2	5.4e-36	1.1e-34	121.1	0	2	147	490	638	489	651	0.92	55.5133
	Phvul.006G166800.1	-	449	Pkinase	PF00069.30	263	4e-59	201.2	0	1	2	2.6e-37	5.4e-36	125.4	0	1	146	80	230	80	262	0.9	55.5133
	Phvul.003G162100.1	-	484	Pkinase	PF00069.30	263	1e-54	186.7	0	1	2	5.5e-32	1.1e-30	107.9	0	2	147	94	247	93	262	0.9	55.5133
	Phvul.005G182900.1	-	712	Pkinase	PF00069.30	263	4.1e-37	129	0	1	2	1.4e-28	2.8e-27	96.8	0	3	148	78	225	76	236	0.9	55.5133
	Phvul.009G198500.1	-	458	Pkinase	PF00069.30	263	1.8e-55	189.2	0	1	2	6.3e-32	1.3e-30	107.7	0	2	146	77	229	76	243	0.92	55.1331
	Phvul.005G054400.1	-	473	Pkinase	PF00069.30	263	3.5e-54	185	0	1	2	4e-34	8.1e-33	114.9	0	3	147	89	236	87	249	0.93	55.1331
	Phvul.002G252500.1	-	475	Pkinase	PF00069.30	263	1.6e-51	176.2	0	1	2	2.9e-31	5.9e-30	105.5	0	1	145	84	244	84	250	0.86	55.1331
	Phvul.007G220700.1	-	757	Pkinase	PF00069.30	263	1.1e-32	114.5	0	1	2	4.5e-32	9.1e-31	108.2	0	2	146	502	649	501	656	0.92	55.1331
	Phvul.008G245600.5	-	735	Pkinase	PF00069.30	263	1.8e-31	110.5	0	1	1	1.6e-32	3.3e-31	109.7	0	3	147	549	695	547	712	0.93	55.1331
	Phvul.008G245600.4	-	802	Pkinase	PF00069.30	263	2.1e-31	110.3	0	1	1	1.8e-32	3.8e-31	109.5	0	3	147	616	762	614	779	0.93	55.1331
	Phvul.008G026700.1	-	219	Pkinase	PF00069.30	263	3.1e-20	73.7	0.2	1	1	1.9e-21	3.9e-20	73.4	0.2	2	146	40	187	39	206	0.86	55.1331
	Phvul.010G086600.1	-	642	Pkinase	PF00069.30	263	4.6e-37	128.9	0	1	2	5.5e-26	1.1e-24	88.2	0	4	147	81	230	78	239	0.88	54.7529
	Phvul.005G181000.2	-	325	Pkinase	PF00069.30	263	8.3e-32	111.6	0.3	1	1	9.5e-33	1.9e-31	110.4	0.1	28	171	164	308	147	319	0.88	54.7529
	Phvul.005G181000.3	-	313	Pkinase	PF00069.30	263	1.2e-31	111.1	0.3	1	1	1.5e-32	3e-31	109.8	0.1	28	171	164	308	147	312	0.89	54.7529
	Phvul.004G155800.1	-	563	Pkinase	PF00069.30	263	1.7e-34	120.4	0.1	2	2	3.8e-19	7.8e-18	65.8	0	118	258	391	540	389	543	0.74	53.6122
	Phvul.001G227600.1	-	460	Pkinase	PF00069.30	263	0.012	16	0.7	1	1	0.0031	0.063	13.7	0.7	3	143	95	246	93	261	0.66	53.6122
	Phvul.002G239400.1	-	676	Pkinase	PF00069.30	263	6.5e-15	56.2	0	1	2	4.3e-12	8.7e-11	42.7	0	5	144	403	569	399	577	0.86	53.2319
	Phvul.007G050000.1	-	291	Pkinase	PF00069.30	263	1.1e-26	94.8	0	1	1	7.7e-28	1.6e-26	94.3	0	23	160	143	287	134	291	0.86	52.4715
	Phvul.001G035100.2	-	809	Pkinase	PF00069.30	263	1.4e-25	91.2	0	1	1	1.1e-26	2.2e-25	90.6	0	3	138	672	808	670	809	0.93	51.711
	Phvul.002G146600.1	-	803	Pkinase	PF00069.30	263	7.6e-11	42.9	0	1	2	4.3e-10	8.7e-09	36.2	0	10	144	471	602	469	609	0.89	51.3308
	Phvul.007G225000.1	-	542	Pkinase	PF00069.30	263	3.7e-41	142.3	0	2	2	8.3e-20	1.7e-18	68	0	131	263	309	475	304	475	0.86	50.5703
	Phvul.006G053100.2	-	212	Pkinase	PF00069.30	263	2.7e-26	93.5	0.5	1	1	3.8e-27	7.7e-26	92.1	0.1	4	136	30	169	28	172	0.92	50.5703
	Phvul.005G088218.1	-	457	Pkinase	PF00069.30	263	6.5e-25	89	0.5	1	1	1e-25	2e-24	87.4	0	2	134	305	440	304	449	0.85	50.5703
	Phvul.007G225000.1	-	542	Pkinase	PF00069.30	263	3.7e-41	142.3	0	1	2	5.1e-21	1e-19	72	0	1	132	42	182	42	187	0.88	50.1901
	Phvul.008G244800.1	-	262	Pkinase	PF00069.30	263	4.6e-29	102.6	0	2	2	2.8e-18	5.6e-17	63	0	127	258	79	217	77	221	0.83	50.1901
	Phvul.007G254000.2	-	626	Pkinase	PF00069.30	263	9.6e-18	65.5	0.1	1	1	3.6e-18	7.3e-17	62.6	0.1	15	146	365	497	362	508	0.88	50.1901
	Phvul.007G254000.1	-	709	Pkinase	PF00069.30	263	1.3e-17	65.1	0.1	1	1	4.5e-18	9.2e-17	62.3	0.1	15	146	448	580	445	590	0.88	50.1901
< 50%	Phvul.002G117100.1	-	442	Pkinase	PF00069.30	263	1.2e-45	156.9	0	1	2	4.9e-23	9.9e-22	78.6	0	2	132	39	178	38	185	0.87	49.8099
	Phvul.011G088500.1	-	537	Pkinase	PF00069.30	263	1.9e-41	143.2	0.3	1	2	3.4e-20	6.8e-19	69.3	0.1	1	131	36	175	36	181	0.88	49.8099
	Phvul.005G128900.1	-	535	Pkinase	PF00069.30	263	5.5e-41	141.7	0	1	2	1.7e-20	3.4e-19	70.3	0	1	131	40	179	40	184	0.88	49.8099
	Phvul.002G117100.3	-	338	Pkinase	PF00069.30	263	5.6e-39	135.1	0	1	2	2.7e-23	5.6e-22	79.4	0	2	132	39	178	38	185	0.87	49.8099
	Phvul.005G128900.2	-	397	Pkinase	PF00069.30	263	1.8e-34	120.3	0	1	2	9.3e-21	1.9e-19	71.1	0	1	131	40	179	40	184	0.88	49.8099
	Phvul.005G128900.3	-	397	Pkinase	PF00069.30	263	1.8e-34	120.3	0	1	2	9.3e-21	1.9e-19	71.1	0	1	131	40	179	40	184	0.88	49.8099
	Phvul.011G152100.2	-	772	Pkinase	PF00069.30	263	1.2e-26	94.7	0	2	2	3.1e-14	6.4e-13	49.7	0	128	258	586	725	583	728	0.65	49.8099
	Phvul.009G220200.7	-	358	Pkinase	PF00069.30	263	7.7e-61	206.8	0	1	2	1.9e-39	3.9e-38	132.4	0.2	1	130	19	149	19	152	0.97	49.4297
	Phvul.009G220200.5	-	401	Pkinase	PF00069.30	263	1.1e-60	206.2	0	1	2	2.4e-39	4.9e-38	132	0.2	1	130	19	149	19	152	0.97	49.4297
	Phvul.009G220200.4	-	431	Pkinase	PF00069.30	263	1.4e-60	205.9	0	1	2	2.8e-39	5.7e-38	131.8	0.2	1	130	19	149	19	152	0.97	49.4297
	Phvul.011G088500.1	-	537	Pkinase	PF00069.30	263	1.9e-41	143.2	0.3	2	2	5.7e-21	1.2e-19	71.8	0	134	263	311	474	292	474	0.85	49.4297
	Phvul.005G128900.1	-	535	Pkinase	PF00069.30	263	5.5e-41	141.7	0	2	2	4.1e-20	8.3e-19	69	0	134	263	319	482	313	482	0.86	49.4297
	Phvul.003G270500.1	-	437	Pkinase	PF00069.30	263	6e-45	154.7	0	1	2	4.3e-23	8.7e-22	78.8	0	4	132	41	178	38	185	0.89	49.0494
	Phvul.002G117100.1	-	442	Pkinase	PF00069.30	263	1.2e-45	156.9	0	2	2	2.2e-22	4.6e-21	76.4	0	136	263	252	413	242	413	0.87	48.6692
	Phvul.002G117100.2	-	462	Pkinase	PF00069.30	263	4.5e-41	142	0	2	2	2.5e-22	5e-21	76.3	0	136	263	272	433	262	433	0.87	48.6692
	Phvul.007G112700.1	-	253	Pkinase	PF00069.30	263	2.9e-38	132.8	0	2	2	2e-25	4.1e-24	86.4	0	136	263	105	224	98	224	0.89	48.6692
	Phvul.011G153500.1	-	739	Pkinase	PF00069.30	263	1.1e-23	85	0.3	1	1	3.9e-24	7.9e-23	82.2	0.3	67	194	487	623	447	627	0.85	48.6692
	Phvul.003G270500.1	-	437	Pkinase	PF00069.30	263	6e-45	154.7	0	2	2	1.3e-21	2.6e-20	73.9	0	137	263	252	412	242	412	0.87	48.289
	Phvul.002G179600.2	-	343	Pkinase	PF00069.30	263	2.8e-40	139.4	1.1	1	2	2.8e-27	5.7e-26	92.5	2.1	1	127	24	158	24	161	0.93	48.289
	Phvul.002G179600.3	-	401	Pkinase	PF00069.30	263	4.7e-40	138.7	1	1	2	3.8e-27	7.7e-26	92.1	2.1	1	127	24	158	24	161	0.93	48.289
	Phvul.010G120500.2	-	477	Pkinase	PF00069.30	263	1.1e-29	104.7	0	1	1	9e-31	1.8e-29	103.9	0	137	263	1	120	1	120	0.92	48.289
	Phvul.002G117100.2	-	462	Pkinase	PF00069.30	263	4.5e-41	142	0	1	2	1.9e-17	3.9e-16	60.2	0	8	132	66	198	38	205	0.82	47.5285
	Phvul.005G051000.1	-	516	Pkinase	PF00069.30	263	1.5e-19	71.5	0.5	1	1	1.2e-20	2.3e-19	70.8	0.5	37	160	241	380	193	382	0.84	47.1483
	Phvul.009G230200.2	-	382	Pkinase	PF00069.30	263	2.7e-55	188.6	0.9	1	2	1.2e-33	2.4e-32	113.4	0.8	29	151	1	124	1	132	0.96	46.7681
	Phvul.011G149466.1	-	252	Pkinase	PF00069.30	263	5.2e-28	99.2	0	1	1	3.9e-29	7.8e-28	98.6	0	75	196	2	132	1	205	0.72	46.3878
	Phvul.008G164500.2	-	176	Pkinase	PF00069.30	263	4.5e-12	46.9	0	1	1	2.8e-13	5.7e-12	46.6	0	137	258	3	132	1	135	0.78	46.3878
	Phvul.005G163901.1	-	468	Pkinase	PF00069.30	263	2.4e-24	87.1	0	1	2	5.3e-16	1.1e-14	55.5	0	4	124	195	318	192	321	0.91	46.0076
	Phvul.006G118300.3	-	689	Pkinase	PF00069.30	263	2.9e-40	139.3	0	2	2	1.2e-18	2.4e-17	64.2	0	140	259	549	659	547	661	0.88	45.6274
	Phvul.005G164400.2	-	736	Pkinase	PF00069.30	263	3.3e-27	96.6	0	2	2	1e-14	2.1e-13	51.3	0	137	255	570	694	561	699	0.88	45.2471
	Phvul.006G075100.1	-	226	Pkinase	PF00069.30	263	6e-11	43.2	0	1	1	3.6e-12	7.4e-11	42.9	0	29	147	41	162	17	197	0.82	45.2471
	Phvul.006G075100.2	-	226	Pkinase	PF00069.30	263	6e-11	43.2	0	1	1	3.6e-12	7.4e-11	42.9	0	29	147	41	162	17	197	0.82	45.2471
	Phvul.006G075100.3	-	226	Pkinase	PF00069.30	263	6e-11	43.2	0	1	1	3.6e-12	7.4e-11	42.9	0	29	147	41	162	17	197	0.82	45.2471
	Phvul.010G086600.1	-	642	Pkinase	PF00069.30	263	4.6e-37	128.9	0	2	2	9.3e-11	1.9e-09	38.3	0	141	258	481	609	472	612	0.76	44.8669
	Phvul.011G194300.4	-	401	Pkinase	PF00069.30	263	2e-26	94	0	2	2	7.2e-12	1.5e-10	42	0	141	258	231	355	228	359	0.8	44.8669
	Phvul.011G194300.3	-	402	Pkinase	PF00069.30	263	2e-26	94	0	2	2	7.2e-12	1.5e-10	42	0	141	258	232	356	229	360	0.8	44.8669
	Phvul.007G191400.1	-	552	Pkinase	PF00069.30	263	7.2e-63	213.4	4.7	2	2	2e-21	4e-20	73.3	0	148	263	310	419	305	419	0.85	44.1065
	Phvul.007G191400.2	-	552	Pkinase	PF00069.30	263	7.2e-63	213.4	4.7	2	2	2e-21	4e-20	73.3	0	148	263	310	419	305	419	0.85	44.1065
	Phvul.007G191400.3	-	552	Pkinase	PF00069.30	263	7.2e-63	213.4	4.7	2	2	2e-21	4e-20	73.3	0	148	263	310	419	305	419	0.85	44.1065
	Phvul.004G124900.2	-	663	Pkinase	PF00069.30	263	3.3e-18	67.1	0.1	1	1	2.6e-19	5.3e-18	66.4	0.1	2	117	524	639	523	642	0.92	44.1065
	Phvul.011G176300.2	-	660	Pkinase	PF00069.30	263	2.6e-16	60.8	0	1	1	2.2e-17	4.6e-16	60	0	2	117	436	551	435	554	0.92	44.1065
	Phvul.011G176300.1	-	691	Pkinase	PF00069.30	263	2.8e-16	60.7	0	1	1	2.4e-17	4.9e-16	59.9	0	2	117	467	582	466	585	0.92	44.1065
	Phvul.006G075100.4	-	214	Pkinase	PF00069.30	263	6.6e-11	43.1	0	1	1	4e-12	8.1e-11	42.8	0	32	147	32	150	12	185	0.83	44.1065
	Phvul.009G079700.1	-	507	Pkinase	PF00069.30	263	5.2e-65	220.5	0.2	2	2	1.6e-20	3.3e-19	70.3	0	149	263	292	400	288	400	0.86	43.7262
	Phvul.011G057900.1	-	421	Pkinase	PF00069.30	263	4.3e-59	201.1	0	2	2	1.7e-21	3.4e-20	73.5	0	149	263	243	348	239	348	0.9	43.7262
	Phvul.009G230200.2	-	382	Pkinase	PF00069.30	263	2.7e-55	188.6	0.9	2	2	2e-21	4.1e-20	73.3	0	150	263	173	280	168	280	0.86	43.346
	Phvul.008G058600.7	-	558	Pkinase	PF00069.30	263	3.6e-28	99.7	0	1	1	2.7e-29	5.5e-28	99.1	0	90	202	314	435	282	496	0.76	42.9658
	Phvul.002G025500.1	-	597	Pkinase	PF00069.30	263	3.2e-25	90	0.6	1	2	1.2e-20	2.4e-19	70.8	0.1	39	151	340	465	324	469	0.84	42.9658
	Phvul.004G155500.1	-	366	Pkinase	PF00069.30	263	6.3e-16	59.6	0	1	1	7.1e-17	1.4e-15	58.4	0	4	116	249	362	247	364	0.91	42.9658
	Phvul.003G208300.1	-	475	Pkinase	PF00069.30	263	0.00035	21	0	1	1	5.3e-05	0.0011	19.5	0	39	151	207	342	194	352	0.69	42.9658
	Phvul.010G030100.1	-	417	Pkinase	PF00069.30	263	5e-58	197.6	0	2	2	3e-24	6.1e-23	82.6	0	152	263	235	338	225	338	0.86	42.5856
	Phvul.008G134800.1	-	430	Pkinase	PF00069.30	263	9.1e-57	193.4	0	2	2	2.3e-24	4.7e-23	82.9	0	152	263	249	347	240	347	0.9	42.5856
	Phvul.005G181000.4	-	289	Pkinase	PF00069.30	263	3.6e-22	80	0.2	1	1	4.6e-23	9.4e-22	78.7	0.1	28	139	164	276	147	279	0.86	42.5856
	Phvul.011G180600.1	-	470	Pkinase	PF00069.30	263	1.7e-60	205.6	0	2	2	1.5e-22	3e-21	77	0	153	263	302	408	272	408	0.87	42.2053
	Phvul.005G043800.1	-	564	Pkinase	PF00069.30	263	2.2e-59	202	0	2	2	8.9e-22	1.8e-20	74.5	0	153	263	398	504	367	504	0.86	42.2053
	Phvul.003G162100.1	-	484	Pkinase	PF00069.30	263	1e-54	186.7	0	2	2	1.8e-22	3.6e-21	76.8	0	153	263	322	433	314	433	0.87	42.2053
	Phvul.002G312000.1	-	409	Pkinase	PF00069.30	263	1.6e-54	186.1	0	2	2	5.4e-20	1.1e-18	68.6	0	153	263	215	348	204	348	0.83	42.2053
	Phvul.002G312000.2	-	409	Pkinase	PF00069.30	263	1.6e-54	186.1	0	2	2	5.4e-20	1.1e-18	68.6	0	153	263	215	348	204	348	0.83	42.2053
	Phvul.007G031300.1	-	454	Pkinase	PF00069.30	263	9.1e-16	59	0.2	1	1	6.7e-17	1.4e-15	58.5	0.2	4	114	340	453	337	454	0.84	42.2053
	Phvul.007G274600.1	-	545	Pkinase	PF00069.30	263	1.6e-65	222.2	0.5	2	2	3.8e-22	7.7e-21	75.7	0	154	263	313	416	299	416	0.83	41.8251
	Phvul.007G274600.2	-	545	Pkinase	PF00069.30	263	1.6e-65	222.2	0.5	2	2	3.8e-22	7.7e-21	75.7	0	154	263	313	416	299	416	0.83	41.8251
	Phvul.007G107900.1	-	545	Pkinase	PF00069.30	263	3.7e-65	221	0.4	2	2	7.1e-22	1.4e-20	74.8	0	154	263	313	416	298	416	0.82	41.8251
	Phvul.007G107900.2	-	545	Pkinase	PF00069.30	263	3.7e-65	221	0.4	2	2	7.1e-22	1.4e-20	74.8	0	154	263	313	416	298	416	0.82	41.8251
	Phvul.009G220200.7	-	358	Pkinase	PF00069.30	263	7.7e-61	206.8	0	2	2	1.7e-21	3.5e-20	73.5	0	154	263	149	247	146	247	0.87	41.8251
	Phvul.009G220200.5	-	401	Pkinase	PF00069.30	263	1.1e-60	206.2	0	2	2	2.1e-21	4.3e-20	73.2	0	154	263	149	247	146	247	0.87	41.8251
	Phvul.009G220200.4	-	431	Pkinase	PF00069.30	263	1.4e-60	205.9	0	2	2	2.4e-21	4.9e-20	73	0	154	263	149	247	146	247	0.87	41.8251
	Phvul.008G154000.1	-	640	Pkinase	PF00069.30	263	2.4e-60	205.2	0	2	2	2.4e-22	4.9e-21	76.3	0	154	263	493	596	483	596	0.91	41.8251
	Phvul.005G003300.1	-	827	Pkinase	PF00069.30	263	5.6e-60	204	0	2	2	1.9e-22	3.8e-21	76.7	0	154	263	673	776	663	776	0.93	41.8251
	Phvul.005G003300.2	-	827	Pkinase	PF00069.30	263	5.6e-60	204	0	2	2	1.9e-22	3.8e-21	76.7	0	154	263	673	776	663	776	0.93	41.8251
	Phvul.001G188100.1	-	872	Pkinase	PF00069.30	263	1.9e-59	202.2	0	2	2	5.1e-23	1e-21	78.5	0	154	263	718	821	708	821	0.93	41.8251
	Phvul.001G188100.2	-	872	Pkinase	PF00069.30	263	1.9e-59	202.2	0	2	2	5.1e-23	1e-21	78.5	0	154	263	718	821	708	821	0.93	41.8251
	Phvul.001G188100.3	-	872	Pkinase	PF00069.30	263	1.9e-59	202.2	0	2	2	5.1e-23	1e-21	78.5	0	154	263	718	821	708	821	0.93	41.8251
	Phvul.004G006600.1	-	609	Pkinase	PF00069.30	263	2.2e-59	202	0	2	2	4.9e-22	9.9e-21	75.3	0	154	263	462	565	452	565	0.91	41.8251
	Phvul.006G166800.1	-	449	Pkinase	PF00069.30	263	4e-59	201.2	0	2	2	1.3e-21	2.7e-20	73.9	0	154	263	294	400	285	400	0.88	41.8251
	Phvul.006G136500.1	-	612	Pkinase	PF00069.30	263	7.2e-59	200.3	0	2	2	1.3e-21	2.6e-20	73.9	0	154	263	451	554	441	554	0.91	41.8251
	Phvul.006G136500.2	-	612	Pkinase	PF00069.30	263	7.2e-59	200.3	0	2	2	1.3e-21	2.6e-20	73.9	0	154	263	451	554	441	554	0.91	41.8251
	Phvul.007G222100.1	-	864	Pkinase	PF00069.30	263	2.9e-58	198.4	0	2	2	3.1e-21	6.2e-20	72.7	0	154	263	708	811	689	811	0.91	41.8251
	Phvul.008G046900.1	-	761	Pkinase	PF00069.30	263	3.4e-58	198.1	0	2	2	1.1e-20	2.3e-19	70.8	0	154	263	595	698	585	698	0.91	41.8251
	Phvul.010G050000.1	-	764	Pkinase	PF00069.30	263	3.5e-58	198.1	0	2	2	7.3e-21	1.5e-19	71.5	0	154	263	596	699	586	699	0.91	41.8251
	Phvul.L010343.1	-	378	Pkinase	PF00069.30	263	1.4e-56	192.8	0	2	2	5.9e-22	1.2e-20	75	0	154	263	211	311	200	311	0.9	41.8251
	Phvul.009G198500.1	-	458	Pkinase	PF00069.30	263	1.8e-55	189.2	0	2	2	2.5e-23	5.2e-22	79.5	0	154	263	298	408	280	408	0.84	41.8251
	Phvul.011G090900.1	-	445	Pkinase	PF00069.30	263	1.2e-54	186.5	0	2	2	7.1e-21	1.5e-19	71.5	0	154	263	302	405	291	405	0.89	41.8251
	Phvul.005G054400.1	-	473	Pkinase	PF00069.30	263	3.5e-54	185	0	2	2	8.2e-20	1.7e-18	68	0	154	263	288	396	276	396	0.82	41.8251
	Phvul.007G103900.1	-	471	Pkinase	PF00069.30	263	3.7e-52	178.3	0	2	2	5.3e-19	1.1e-17	65.4	0	154	263	329	432	316	432	0.88	41.8251
	Phvul.004G165900.1	-	437	Pkinase	PF00069.30	263	8.3e-52	177.2	0	2	2	2.4e-21	4.9e-20	73	0	154	263	274	403	259	403	0.91	41.8251
	Phvul.002G252500.1	-	475	Pkinase	PF00069.30	263	1.6e-51	176.2	0	2	2	1.4e-19	2.8e-18	67.3	0	154	263	318	424	310	424	0.87	41.8251
	Phvul.010G046800.2	-	952	Pkinase	PF00069.30	263	2.6e-44	152.6	0	2	2	1.5e-20	3e-19	70.4	0	154	263	785	925	776	925	0.81	41.8251
	Phvul.010G046800.3	-	952	Pkinase	PF00069.30	263	2.6e-44	152.6	0	2	2	1.5e-20	3e-19	70.4	0	154	263	785	925	776	925	0.81	41.8251
	Phvul.010G046800.1	-	953	Pkinase	PF00069.30	263	2.6e-44	152.6	0	2	2	1.5e-20	3e-19	70.4	0	154	263	786	926	777	926	0.81	41.8251
	Phvul.010G046800.4	-	953	Pkinase	PF00069.30	263	2.6e-44	152.6	0	2	2	1.5e-20	3e-19	70.4	0	154	263	786	926	777	926	0.81	41.8251
	Phvul.002G126600.1	-	742	Pkinase	PF00069.30	263	1.2e-11	45.5	0.2	2	2	1e-06	2e-05	25.1	0	128	237	582	698	578	718	0.68	41.8251
	Phvul.004G087801.1	-	700	Pkinase	PF00069.30	263	0.00039	20.9	0	2	2	0.002	0.04	14.3	0	43	151	261	371	245	382	0.82	41.4449
	Phvul.005G182900.1	-	712	Pkinase	PF00069.30	263	4.1e-37	129	0	2	2	4.2e-08	8.5e-07	29.6	0	152	258	561	675	554	678	0.76	40.6844
	Phvul.007G064200.1	-	537	Pkinase	PF00069.30	263	1.2e-34	121	0	2	2	1.5e-09	3.2e-08	34.3	0	154	258	399	511	388	514	0.76	39.924
	Phvul.004G124400.1	-	664	Pkinase	PF00069.30	263	1e-31	111.4	0	2	2	2.2e-07	4.5e-06	27.3	0	154	258	519	631	506	633	0.71	39.924
	Phvul.005G118000.1	-	301	Pkinase	PF00069.30	263	1.3e-12	48.7	0	1	1	4.4e-13	9.1e-12	45.9	0	40	144	76	186	50	196	0.86	39.924
	Phvul.007G249400.1	-	226	Pkinase	PF00069.30	263	7.6e-11	42.9	0	1	1	4.8e-12	9.7e-11	42.6	0	42	146	48	161	14	181	0.79	39.924
	Phvul.007G249400.2	-	226	Pkinase	PF00069.30	263	7.6e-11	42.9	0	1	1	4.8e-12	9.7e-11	42.6	0	42	146	48	161	14	181	0.79	39.924
	Phvul.010G111200.3	-	862	Pkinase	PF00069.30	263	6.6e-08	33.3	0.1	2	2	2.7e-06	5.6e-05	23.7	0	160	263	261	351	242	351	0.76	39.5437
	Phvul.010G111200.1	-	1006	Pkinase	PF00069.30	263	9.5e-08	32.8	0.1	2	2	3.4e-06	6.8e-05	23.4	0	160	263	405	495	386	495	0.76	39.5437
	Phvul.010G111200.2	-	1006	Pkinase	PF00069.30	263	9.5e-08	32.8	0.1	2	2	3.4e-06	6.8e-05	23.4	0	160	263	405	495	386	495	0.76	39.5437
	Phvul.007G244300.5	-	459	Pkinase	PF00069.30	263	4.5e-15	56.8	0	1	1	3.9e-16	7.9e-15	56	0	157	259	1	110	1	113	0.75	39.1635
	Phvul.005G071800.2	-	740	Pkinase	PF00069.30	263	4.6e-08	33.8	0	2	2	4.7e-07	9.6e-06	26.2	0	161	263	274	363	254	363	0.81	39.1635
	Phvul.005G071800.3	-	740	Pkinase	PF00069.30	263	4.6e-08	33.8	0	2	2	4.7e-07	9.6e-06	26.2	0	161	263	274	363	254	363	0.81	39.1635
	Phvul.005G071800.9	-	740	Pkinase	PF00069.30	263	4.6e-08	33.8	0	2	2	4.7e-07	9.6e-06	26.2	0	161	263	274	363	254	363	0.81	39.1635
	Phvul.005G071800.1	-	909	Pkinase	PF00069.30	263	7.5e-08	33.1	0	2	2	6.2e-07	1.3e-05	25.8	0	161	263	274	363	254	363	0.81	39.1635
	Phvul.005G071800.6	-	909	Pkinase	PF00069.30	263	7.5e-08	33.1	0	2	2	6.2e-07	1.3e-05	25.8	0	161	263	274	363	254	363	0.81	39.1635
	Phvul.005G071800.7	-	909	Pkinase	PF00069.30	263	7.5e-08	33.1	0	2	2	6.2e-07	1.3e-05	25.8	0	161	263	274	363	254	363	0.81	39.1635
	Phvul.005G071800.8	-	909	Pkinase	PF00069.30	263	7.5e-08	33.1	0	2	2	6.2e-07	1.3e-05	25.8	0	161	263	274	363	254	363	0.81	39.1635
	Phvul.006G175100.4	-	546	Pkinase	PF00069.30	263	3.1e-12	47.5	0.4	1	2	5e-08	1e-06	29.4	0.2	15	116	268	375	264	377	0.82	38.7833
	Phvul.006G175100.3	-	609	Pkinase	PF00069.30	263	4.3e-12	47	0.4	1	2	5.9e-08	1.2e-06	29.1	0.2	15	116	331	438	327	440	0.81	38.7833
	Phvul.006G175100.1	-	657	Pkinase	PF00069.30	263	5e-12	46.8	0.4	1	2	6.6e-08	1.4e-06	29	0.2	15	116	379	486	375	488	0.81	38.7833
	Phvul.006G175100.2	-	657	Pkinase	PF00069.30	263	5e-12	46.8	0.4	1	2	6.6e-08	1.4e-06	29	0.2	15	116	379	486	375	488	0.81	38.7833
	Phvul.002G162800.1	-	1138	Pkinase	PF00069.30	263	0.053	13.9	0	1	1	0.0096	0.2	12.1	0	161	262	544	628	530	629	0.74	38.7833
	Phvul.002G162800.2	-	1138	Pkinase	PF00069.30	263	0.053	13.9	0	1	1	0.0096	0.2	12.1	0	161	262	544	628	530	629	0.74	38.7833
	Phvul.009G110600.1	-	975	Pkinase	PF00069.30	263	4.6e-13	50.2	0.3	2	2	2.8e-06	5.7e-05	23.6	0	159	259	855	964	849	966	0.77	38.403
	Phvul.011G158700.1	-	198	Pkinase	PF00069.30	263	1.1e-05	26	0.1	1	1	6.1e-06	0.00012	22.5	0.1	154	254	110	197	1	198	0.69	38.403
	Phvul.007G089301.1	-	298	Pkinase	PF00069.30	263	2.9e-23	83.6	0	1	1	2.5e-24	5.2e-23	82.8	0	164	263	1	91	1	91	0.98	38.0228
	Phvul.005G120700.3	-	866	Pkinase	PF00069.30	263	8.2e-16	59.2	0	1	1	7.7e-17	1.6e-15	58.3	0	164	263	1	89	1	89	0.86	38.0228
	Phvul.L001852.1	-	172	Pkinase	PF00069.30	263	2.4e-10	41.2	0	1	1	1.7e-11	3.4e-10	40.8	0	159	258	2	102	1	104	0.77	38.0228
	Phvul.005G163901.1	-	468	Pkinase	PF00069.30	263	2.4e-24	87.1	0	2	2	4.9e-08	1e-06	29.4	0	157	255	322	423	319	429	0.85	37.6426
	Phvul.002G069801.1	-	245	Pkinase	PF00069.30	263	1.8e-07	31.8	0	1	1	1.3e-08	2.7e-07	31.3	0	161	259	17	121	8	127	0.7	37.6426
	Phvul.006G118300.3	-	689	Pkinase	PF00069.30	263	2.9e-40	139.3	0	1	2	2.8e-21	5.8e-20	72.8	0	2	98	443	537	442	549	0.91	36.8821
	Phvul.009G129300.1	-	816	Pkinase	PF00069.30	263	0.17	12.2	0	1	1	0.019	0.39	11.1	0	163	257	328	438	306	443	0.64	36.1217
	Phvul.003G148600.2	-	451	Pkinase	PF00069.30	263	3e-62	211.4	2.8	2	2	2.9e-13	6e-12	46.5	0	170	263	162	244	158	244	0.83	35.7414
	Phvul.011G175000.2	-	596	Pkinase	PF00069.30	263	7.1e-13	49.6	0	1	1	6.3e-14	1.3e-12	48.7	0	2	95	489	579	488	592	0.9	35.7414
	Phvul.002G049450.1	-	157	Pkinase	PF00069.30	263	0.00029	21.3	0	1	1	2.1e-05	0.00043	20.8	0	164	257	1	99	1	103	0.58	35.7414
	Phvul.007G112700.1	-	253	Pkinase	PF00069.30	263	2.9e-38	132.8	0	1	2	8.8e-13	1.8e-11	45	0	5	97	5	98	1	103	0.9	35.3612
	Phvul.011G175301.4	-	587	Pkinase	PF00069.30	263	6.9e-13	49.6	0	1	1	6.7e-14	1.4e-12	48.6	0	2	94	480	569	479	580	0.91	35.3612
	Phvul.011G175301.3	-	592	Pkinase	PF00069.30	263	7e-13	49.6	0	1	1	6.8e-14	1.4e-12	48.6	0	2	94	485	574	484	585	0.91	35.3612
	Phvul.008G118500.1	-	616	Pkinase	PF00069.30	263	3.9e-28	99.6	0	2	2	3.5e-17	7.1e-16	59.4	0	107	198	502	604	499	613	0.9	34.981
	Phvul.002G179600.2	-	343	Pkinase	PF00069.30	263	2.8e-40	139.4	1.1	2	2	1.4e-12	2.9e-11	44.3	0	174	263	163	241	158	241	0.83	34.2205
	Phvul.002G179600.3	-	401	Pkinase	PF00069.30	263	4.7e-40	138.7	1	2	2	1.8e-12	3.7e-11	43.9	0	174	263	163	241	158	241	0.83	34.2205
	Phvul.004G155800.1	-	563	Pkinase	PF00069.30	263	1.7e-34	120.4	0.1	1	2	6.2e-15	1.3e-13	52	0.1	4	93	299	384	296	390	0.91	34.2205
	Phvul.006G006800.3	-	413	Pkinase	PF00069.30	263	8.9e-13	49.2	0.1	1	1	8e-14	1.6e-12	48.4	0.1	2	91	325	411	324	413	0.93	34.2205
	Phvul.004G124000.1	-	996	Pkinase	PF00069.30	263	1.1e-07	32.5	0	1	2	1.9e-06	3.9e-05	24.2	0	99	188	856	943	845	953	0.87	34.2205
	Phvul.011G150200.1	-	778	Pkinase	PF00069.30	263	1.6e-27	97.6	0	1	2	7.6e-14	1.5e-12	48.5	0	2	90	490	575	489	587	0.9	33.8403
	Phvul.011G194300.4	-	401	Pkinase	PF00069.30	263	2e-26	94	0	1	2	2.4e-14	4.9e-13	50.1	0	2	90	123	208	122	230	0.85	33.8403
	Phvul.011G194300.3	-	402	Pkinase	PF00069.30	263	2e-26	94	0	1	2	2.4e-14	5e-13	50.1	0	2	90	124	209	123	231	0.85	33.8403
	Phvul.001G066550.1	-	159	Pkinase	PF00069.30	263	8.6e-09	36.2	0	1	1	5.7e-10	1.2e-08	35.8	0	170	258	2	95	1	99	0.81	33.8403
	Phvul.005G164400.2	-	736	Pkinase	PF00069.30	263	3.3e-27	96.6	0	1	2	3.5e-12	7.1e-11	43	0	4	91	464	550	461	566	0.88	33.4601
	Phvul.007G062300.1	-	1659	Pkinase	PF00069.30	263	9.7e-15	55.7	0	2	2	0.00016	0.0034	17.8	0	176	263	718	791	708	791	0.82	33.4601
	Phvul.003G271000.2	-	611	Pkinase	PF00069.30	263	7.7e-06	26.5	0	1	1	6e-07	1.2e-05	25.8	0	4	91	456	540	453	553	0.79	33.4601
	Phvul.008G239800.1	-	569	Pkinase	PF00069.30	263	0.34	11.3	0	1	1	0.031	0.64	10.4	0	48	135	251	337	233	364	0.75	33.4601
	Phvul.007G050300.1	-	1072	Pkinase	PF00069.30	263	3.1e-61	208.1	1.9	2	3	2.4e-13	4.9e-12	46.8	0	3	89	850	933	848	939	0.92	33.0798
	Phvul.002G025500.1	-	597	Pkinase	PF00069.30	263	3.2e-25	90	0.6	2	2	9e-05	0.0018	18.7	0	172	258	464	560	463	563	0.72	33.0798
	Phvul.003G027300.1	-	579	Pkinase	PF00069.30	263	4.3e-24	86.3	0	2	2	0.0033	0.067	13.6	0	177	263	375	469	365	469	0.67	33.0798
	Phvul.011G175301.6	-	554	Pkinase	PF00069.30	263	1.6e-12	48.4	0	1	1	1.6e-13	3.3e-12	47.4	0	2	88	461	544	460	552	0.93	33.0798
	Phvul.011G175301.5	-	573	Pkinase	PF00069.30	263	1.7e-12	48.3	0	1	1	1.7e-13	3.4e-12	47.3	0	2	88	480	563	479	571	0.93	33.0798
	Phvul.007G236200.1	-	781	Pkinase	PF00069.30	263	0.00021	21.8	0	2	2	0.0006	0.012	16	0	68	154	358	438	337	452	0.78	33.0798
	Phvul.001G242500.1	-	541	Pkinase	PF00069.30	263	0.0041	17.6	0.1	1	1	0.00072	0.015	15.7	0	66	152	266	363	230	407	0.78	33.0798
	Phvul.007G050300.1	-	1072	Pkinase	PF00069.30	263	3.1e-61	208.1	1.9	3	3	0.049	1	9.7	0	172	257	940	1029	935	1032	0.66	32.6996
	Phvul.010G058150.1	-	509	Pkinase	PF00069.30	263	1.6e-23	84.5	0.1	3	3	0.083	1.7	9	0	178	263	400	490	384	490	0.73	32.6996
	Phvul.010G058150.2	-	509	Pkinase	PF00069.30	263	1.6e-23	84.5	0.1	3	3	0.083	1.7	9	0	178	263	400	490	384	490	0.73	32.6996
	Phvul.011G152100.2	-	772	Pkinase	PF00069.30	263	1.2e-26	94.7	0	1	2	1.1e-12	2.3e-11	44.6	0	3	87	507	587	505	590	0.93	32.3194
	Phvul.002G146600.1	-	803	Pkinase	PF00069.30	263	7.6e-11	42.9	0	2	2	2.2	46	4.3	0	172	256	608	690	602	695	0.72	32.3194
	Phvul.005G163200.1	-	494	Pkinase	PF00069.30	263	9.3e-10	39.3	0	1	1	7.5e-11	1.5e-09	38.6	0	5	89	413	493	410	494	0.93	32.3194
	Phvul.005G162200.1	-	137	Pkinase	PF00069.30	263	1.7e-06	28.6	0	1	1	1.4e-07	2.8e-06	27.9	0	174	258	7	94	4	100	0.86	32.3194
	Phvul.006G071600.2	-	488	Pkinase	PF00069.30	263	4.4e-06	27.3	0	1	1	3.4e-07	6.9e-06	26.6	0	7	91	388	476	384	487	0.77	32.3194
	Phvul.008G143200.1	-	697	Pkinase	PF00069.30	263	0.015	15.7	0	1	1	0.0087	0.18	12.2	0	68	152	315	398	276	431	0.79	32.3194
	Phvul.008G143200.2	-	697	Pkinase	PF00069.30	263	0.015	15.7	0	1	1	0.0087	0.18	12.2	0	68	152	315	398	276	431	0.79	32.3194
	Phvul.011G175500.1	-	140	Pkinase	PF00069.30	263	0.046	14.1	0	1	1	0.0035	0.071	13.5	0	175	259	4	88	2	91	0.57	32.3194
	Phvul.008G118500.1	-	616	Pkinase	PF00069.30	263	3.9e-28	99.6	0	1	2	7.7e-11	1.6e-09	38.6	0	2	85	414	500	413	503	0.9	31.9392
	Phvul.002G239400.1	-	676	Pkinase	PF00069.30	263	6.5e-15	56.2	0	2	2	0.022	0.46	10.9	0	175	258	578	660	572	662	0.79	31.9392
	Phvul.004G040300.2	-	607	Pkinase	PF00069.30	263	1.7e-13	51.6	0	1	1	1.4e-14	2.9e-13	50.8	0	6	89	514	595	509	603	0.93	31.9392
	Phvul.010G077900.1	-	718	Pkinase	PF00069.30	263	0.024	15	0.1	1	1	0.017	0.34	11.3	0	69	152	336	418	298	434	0.79	31.9392
	Phvul.006G175100.4	-	546	Pkinase	PF00069.30	263	3.1e-12	47.5	0.4	2	2	0.00056	0.011	16.1	0	177	259	430	513	412	515	0.72	31.5589
	Phvul.006G175100.3	-	609	Pkinase	PF00069.30	263	4.3e-12	47	0.4	2	2	0.00066	0.013	15.9	0	177	259	493	576	475	578	0.72	31.5589
	Phvul.006G175100.1	-	657	Pkinase	PF00069.30	263	5e-12	46.8	0.4	2	2	0.00073	0.015	15.7	0	177	259	541	624	523	626	0.72	31.5589
	Phvul.006G175100.2	-	657	Pkinase	PF00069.30	263	5e-12	46.8	0.4	2	2	0.00073	0.015	15.7	0	177	259	541	624	523	626	0.72	31.5589
	Phvul.001G058600.1	-	659	Pkinase	PF00069.30	263	0.0017	18.8	0	2	2	0.0073	0.15	12.5	0	71	153	321	402	294	418	0.74	31.5589
	Phvul.007G093900.1	-	826	Pkinase	PF00069.30	263	0.037	14.4	0	1	1	0.013	0.26	11.6	0	72	154	380	478	355	487	0.75	31.5589
	Phvul.011G108301.1	-	138	Pkinase	PF00069.30	263	2.7e-20	73.9	0.3	2	2	7.5e-20	1.5e-18	68.1	0	98	178	48	133	39	137	0.85	30.7985
	Phvul.004G122500.2	-	487	Pkinase	PF00069.30	263	8.1e-57	193.6	0	2	2	1.1e-13	2.2e-12	48	0	184	263	197	268	195	268	0.88	30.4183
	Phvul.007G220700.1	-	757	Pkinase	PF00069.30	263	1.1e-32	114.5	0	2	2	2.4	48	4.2	0	177	256	660	742	653	747	0.64	30.4183
	Phvul.007G062300.1	-	1659	Pkinase	PF00069.30	263	9.7e-15	55.7	0	1	2	8.3e-10	1.7e-08	35.2	0	53	132	205	285	197	293	0.9	30.4183
	Phvul.001G102100.1	-	696	Pkinase	PF00069.30	263	0.028	14.8	0	1	1	0.0028	0.056	13.8	0	85	164	511	593	501	632	0.84	30.4183
	Phvul.002G201400.1	-	528	Pkinase	PF00069.30	263	3.2e-05	24.5	0.1	1	1	3.4e-06	6.9e-05	23.4	0	41	116	303	377	271	409	0.84	28.8973
	Phvul.009G110600.1	-	975	Pkinase	PF00069.30	263	4.6e-13	50.2	0.3	1	2	1.8e-06	3.8e-05	24.2	0.1	43	117	743	814	717	820	0.88	28.5171
	Phvul.011G150200.1	-	778	Pkinase	PF00069.30	263	1.6e-27	97.6	0	2	2	1.9e-13	3.8e-12	47.2	0	125	198	587	663	584	727	0.86	28.1369
	Phvul.002G251608.1	-	181	Pkinase	PF00069.30	263	7e-12	46.3	0	1	1	3.5e-13	7.1e-12	46.3	0	126	198	2	81	1	157	0.84	27.7567
	Phvul.006G075100.5	-	163	Pkinase	PF00069.30	263	1.5e-09	38.6	0	1	1	1.3e-10	2.7e-09	37.8	0	74	146	23	98	9	110	0.85	27.7567
	Phvul.007G244300.4	-	460	Pkinase	PF00069.30	263	0.091	13.1	0	1	1	0.0086	0.18	12.2	0	187	259	32	111	29	114	0.65	27.7567
	Phvul.010G074500.1	-	119	Pkinase	PF00069.30	263	1.5e-13	51.8	0	1	1	7.8e-15	1.6e-13	51.7	0	107	178	36	113	16	118	0.84	27.3764
	Phvul.006G015000.1	-	104	Pkinase	PF00069.30	263	1.8e-13	51.5	0	1	1	9.5e-15	1.9e-13	51.4	0	99	170	19	95	4	103	0.85	27.3764
	Phvul.005G128900.2	-	397	Pkinase	PF00069.30	263	1.8e-34	120.3	0	2	2	2.4e-13	4.9e-12	46.8	0	134	204	319	387	313	394	0.88	26.9962
	Phvul.005G128900.3	-	397	Pkinase	PF00069.30	263	1.8e-34	120.3	0	2	2	2.4e-13	4.9e-12	46.8	0	134	204	319	387	313	394	0.88	26.9962
	Phvul.010G058150.1	-	509	Pkinase	PF00069.30	263	1.6e-23	84.5	0.1	2	3	8.9e-19	1.8e-17	64.6	0	99	168	297	368	273	380	0.91	26.616
	Phvul.010G058150.2	-	509	Pkinase	PF00069.30	263	1.6e-23	84.5	0.1	2	3	8.9e-19	1.8e-17	64.6	0	99	168	297	368	273	380	0.91	26.616
	Phvul.001G071401.1	-	360	Pkinase	PF00069.30	263	5.3e-06	27	0	1	1	4e-07	8.2e-06	26.4	0	3	72	291	357	289	359	0.89	26.616
	Phvul.008G244800.1	-	262	Pkinase	PF00069.30	263	4.6e-29	102.6	0	1	2	1.3e-10	2.6e-09	37.9	0	2	70	9	74	8	78	0.91	26.2357
	Phvul.002G117100.3	-	338	Pkinase	PF00069.30	263	5.6e-39	135.1	0	2	2	1.8e-15	3.7e-14	53.8	0	136	203	252	317	242	331	0.87	25.8555
	Phvul.006G020900.10	-	416	Pkinase	PF00069.30	263	2.7e-59	201.7	0	1	2	1.5e-13	3e-12	47.5	0.1	1	66	13	79	13	83	0.95	25.0951
	Phvul.006G020900.11	-	416	Pkinase	PF00069.30	263	2.7e-59	201.7	0	1	2	1.5e-13	3e-12	47.5	0.1	1	66	13	79	13	83	0.95	25.0951
	Phvul.006G020900.12	-	416	Pkinase	PF00069.30	263	2.7e-59	201.7	0	1	2	1.5e-13	3e-12	47.5	0.1	1	66	13	79	13	83	0.95	25.0951
	Phvul.001G076300.1	-	497	Pkinase	PF00069.30	263	2.5e-09	37.9	0.1	1	1	1.9e-10	4e-09	37.3	0.1	4	69	411	472	409	478	0.91	25.0951
	Phvul.008G166700.3	-	293	Pkinase	PF00069.30	263	2.1e-08	34.9	0.4	1	1	1.7e-09	3.6e-08	34.2	0.4	1	66	217	282	217	291	0.94	25.0951
	Phvul.002G159500.2	-	326	Pkinase	PF00069.30	263	1.3e-56	193	0	1	2	5.2e-09	1.1e-07	32.6	0	5	59	42	96	39	98	0.96	20.9125
	Phvul.002G126600.1	-	742	Pkinase	PF00069.30	263	1.2e-11	45.5	0.2	1	2	0.00012	0.0025	18.3	0.1	16	67	516	565	511	572	0.86	19.7719
	Phvul.001G222600.1	-	633	Pkinase	PF00069.30	263	0.31	11.4	0	1	1	0.31	6.3	7.1	0	95	146	451	523	425	531	0.69	19.7719
	Phvul.009G158300.1	-	744	Pkinase	PF00069.30	263	0.36	11.2	0	1	1	0.029	0.59	10.5	0	81	132	531	582	524	667	0.91	19.7719
	Phvul.005G162400.2	-	625	Pkinase	PF00069.30	263	0.14	12.6	0	1	1	0.012	0.25	11.7	0	4	54	577	623	575	625	0.82	19.3916
	Phvul.005G157300.1	-	213	Pkinase	PF00069.30	263	7e-10	39.7	0	1	2	8.1e-06	0.00017	22.1	0	1	47	9	55	9	63	0.87	17.8707
	Phvul.005G071800.2	-	740	Pkinase	PF00069.30	263	4.6e-08	33.8	0	1	2	1.2	24	5.2	0	84	130	107	154	86	165	0.81	17.8707
	Phvul.005G071800.3	-	740	Pkinase	PF00069.30	263	4.6e-08	33.8	0	1	2	1.2	24	5.2	0	84	130	107	154	86	165	0.81	17.8707
	Phvul.005G071800.9	-	740	Pkinase	PF00069.30	263	4.6e-08	33.8	0	1	2	1.2	24	5.2	0	84	130	107	154	86	165	0.81	17.8707
	Phvul.005G071800.1	-	909	Pkinase	PF00069.30	263	7.5e-08	33.1	0	1	2	1.5	31	4.8	0	84	130	107	154	86	165	0.81	17.8707
	Phvul.005G071800.6	-	909	Pkinase	PF00069.30	263	7.5e-08	33.1	0	1	2	1.5	31	4.8	0	84	130	107	154	86	165	0.81	17.8707
	Phvul.005G071800.7	-	909	Pkinase	PF00069.30	263	7.5e-08	33.1	0	1	2	1.5	31	4.8	0	84	130	107	154	86	165	0.81	17.8707
	Phvul.005G071800.8	-	909	Pkinase	PF00069.30	263	7.5e-08	33.1	0	1	2	1.5	31	4.8	0	84	130	107	154	86	165	0.81	17.8707
	Phvul.010G111200.3	-	862	Pkinase	PF00069.30	263	6.6e-08	33.3	0.1	1	2	0.33	6.6	7	0	85	129	98	143	79	161	0.78	17.1103
	Phvul.010G111200.1	-	1006	Pkinase	PF00069.30	263	9.5e-08	32.8	0.1	1	2	0.4	8	6.8	0	85	129	242	287	224	305	0.78	17.1103
	Phvul.010G111200.2	-	1006	Pkinase	PF00069.30	263	9.5e-08	32.8	0.1	1	2	0.4	8	6.8	0	85	129	242	287	224	305	0.78	17.1103
	Phvul.002G021600.2	-	324	Pkinase	PF00069.30	263	5.4e-56	190.9	0	2	2	4.7e-05	0.00096	19.6	0	220	263	199	242	195	242	0.91	16.73
	Phvul.009G145400.4	-	423	Pkinase	PF00069.30	263	1.3e-59	202.7	0	1	2	1.5e-05	0.0003	21.3	0.2	1	41	9	49	9	56	0.89	15.5894
	Phvul.009G145400.3	-	425	Pkinase	PF00069.30	263	1.4e-59	202.7	0	1	2	1.5e-05	0.0003	21.3	0.2	1	41	9	49	9	56	0.89	15.5894
	Phvul.006G150900.1	-	390	Pkinase	PF00069.30	263	5e-49	168.1	0	2	2	8.9	180	2.3	0	84	124	318	365	298	370	0.68	15.5894
	Phvul.007G174700.1	-	1071	Pkinase	PF00069.30	263	9.4e-27	95.1	0	1	2	2.7	55	4	0	1	40	617	657	617	666	0.77	15.2091
	Phvul.007G174700.2	-	1071	Pkinase	PF00069.30	263	9.4e-27	95.1	0	1	2	2.7	55	4	0	1	40	617	657	617	666	0.77	15.2091
	Phvul.003G165700.3	-	407	Pkinase	PF00069.30	263	4.6e-52	178	0	1	2	4.3e-06	8.8e-05	23	0.3	1	39	17	55	17	64	0.9	14.8289
	Phvul.002G186600.1	-	322	Pkinase	PF00069.30	263	1.2e-46	160.2	0	2	2	1.1e-06	2.2e-05	25	0	225	263	206	244	198	244	0.9	14.8289
	Phvul.011G186900.1	-	527	Pkinase	PF00069.30	263	3.4e-62	211.2	0	1	2	0.0048	0.098	13	0	1	37	12	51	12	56	0.82	14.0684
	Phvul.005G017000.1	-	517	Pkinase	PF00069.30	263	0.046	14.1	0	1	1	0.0039	0.08	13.3	0	115	150	355	392	315	423	0.75	13.6882
	Phvul.011G175301.7	-	159	Pkinase	PF00069.30	263	0.0042	17.5	0	1	1	0.00025	0.005	17.3	0	164	198	1	35	1	103	0.73	13.308
	Phvul.008G030200.1	-	864	Pkinase	PF00069.30	263	2.3e-45	156	0	1	2	3.3	67	3.7	0	136	169	260	292	255	300	0.84	12.9278
	Phvul.003G139300.2	-	166	Pkinase	PF00069.30	263	0.025	15	0.1	1	1	0.0019	0.04	14.3	0.1	3	33	122	152	120	159	0.9	11.7871
	Phvul.003G139300.1	-	187	Pkinase	PF00069.30	263	0.028	14.8	0	1	1	0.0021	0.043	14.2	0	3	33	122	152	120	163	0.9	11.7871
	Phvul.007G083800.4	-	232	Pkinase	PF00069.30	263	0.16	12.4	0	1	1	0.011	0.22	11.9	0	118	148	64	95	48	128	0.77	11.7871
	Phvul.007G083800.3	-	291	Pkinase	PF00069.30	263	0.22	11.9	0	1	1	0.017	0.34	11.3	0	118	148	123	154	109	186	0.77	11.7871
	Phvul.011G198200.1	-	372	Pkinase	PF00069.30	263	1.6e-30	107.4	4.6	1	2	0.0012	0.024	15	0.9	4	33	81	109	79	112	0.9	11.4068
	Phvul.005G157300.1	-	213	Pkinase	PF00069.30	263	7e-10	39.7	0	2	2	0.0008	0.016	15.6	0	122	150	128	159	127	176	0.81	11.0266
	Phvul.011G194100.1	-	173	Pkinase	PF00069.30	263	0.0025	18.3	0.1	1	1	0.0002	0.004	17.6	0.1	102	129	21	51	3	58	0.83	10.6464
	Phvul.004G124000.1	-	996	Pkinase	PF00069.30	263	1.1e-07	32.5	0	2	2	0.78	16	5.8	0.1	234	260	952	978	949	980	0.89	10.2662
	Phvul.008G028600.1	-	375	Pkinase	PF00069.30	263	8.8e-27	95.2	0	2	2	4.5	92	3.3	0	234	257	299	322	286	330	0.83	9.12548
	Phvul.007G236200.1	-	781	Pkinase	PF00069.30	263	0.00021	21.8	0	1	2	4.6	94	3.3	0	11	31	259	279	253	284	0.91	7.98479
	Phvul.004G087801.1	-	700	Pkinase	PF00069.30	263	0.00039	20.9	0	1	2	2.8	57	4	0.1	12	32	200	220	197	229	0.89	7.98479
	Phvul.001G058600.1	-	659	Pkinase	PF00069.30	263	0.0017	18.8	0	1	2	3	62	3.9	0	11	31	218	238	210	242	0.87	7.98479
	Phvul.008G081300.1	-	498	Pkinase	PF00069.30	263	1e-23	85.1	0.1	1	2	1.7	35	4.7	0.1	4	21	142	159	139	195	0.86	6.84411
	Phvul.008G081300.2	-	498	Pkinase	PF00069.30	263	1e-23	85.1	0.1	1	2	1.7	35	4.7	0.1	4	21	142	159	139	195	0.86	6.84411
	Phvul.010G058150.1	-	509	Pkinase	PF00069.30	263	1.6e-23	84.5	0.1	1	3	0.37	7.5	6.9	0.4	2	19	144	161	143	169	0.85	6.84411
	Phvul.010G058150.2	-	509	Pkinase	PF00069.30	263	1.6e-23	84.5	0.1	1	3	0.37	7.5	6.9	0.4	2	19	144	161	143	169	0.85	6.84411
	Phvul.011G108301.1	-	138	Pkinase	PF00069.30	263	2.7e-20	73.9	0.3	1	2	1.7	35	4.7	0.1	5	20	26	41	22	47	0.83	6.08365

## Sheet: Table S2
Table S2. Annotation of the PK_Tyr_Ser-Thr domain (PF07714) in WAK/WAKL proteins from Phaseolus vulgaris.
Cover	Target_name	accession	tlen	Query_name	accession	qlen	E-value	score	bias	#	of	c-Evalue	i-Evalue	score	bias	from	to	from	to	from	to	acc	Cover
> 50%	Phvul.003G114400.1	-	783	PK_Tyr_Ser-Thr	PF07714.22	258	3.8e-69	233.9	0	1	1	2.6e-70	5.3e-69	233.4	0	1	258	505	757	505	757	0.96	100
	Phvul.002G328800.2	-	932	PK_Tyr_Ser-Thr	PF07714.22	258	1.5e-66	225.4	0	1	1	1e-67	2.2e-66	224.9	0	1	258	652	904	652	904	0.96	100
	Phvul.002G328800.1	-	999	PK_Tyr_Ser-Thr	PF07714.22	258	1.7e-66	225.2	0	1	1	1.2e-67	2.4e-66	224.7	0	1	258	719	971	719	971	0.85	100
	Phvul.009G081200.1	-	432	PK_Tyr_Ser-Thr	PF07714.22	258	1.2e-42	147.1	0	1	1	1.2e-43	2.5e-42	146	0	1	258	152	420	152	420	0.94	99.6124
	Phvul.007G016500.2	-	495	PK_Tyr_Ser-Thr	PF07714.22	258	9.4e-73	245.7	0	1	1	6.9e-74	1.4e-72	245.1	0	2	258	217	465	216	465	0.94	99.6124
	Phvul.007G016500.3	-	543	PK_Tyr_Ser-Thr	PF07714.22	258	1.2e-72	245.4	0	1	1	8.6e-74	1.8e-72	244.8	0	2	258	265	513	264	513	0.94	99.6124
	Phvul.007G016500.1	-	583	PK_Tyr_Ser-Thr	PF07714.22	258	1.4e-72	245.2	0	1	1	1e-73	2.1e-72	244.6	0	2	258	305	553	304	553	0.95	99.6124
	Phvul.007G078800.2	-	536	PK_Tyr_Ser-Thr	PF07714.22	258	1.5e-72	245	0	1	1	1.1e-73	2.2e-72	244.5	0	1	257	272	519	272	520	0.95	99.6124
	Phvul.007G078800.1	-	553	PK_Tyr_Ser-Thr	PF07714.22	258	1.6e-72	244.9	0	1	1	1.2e-73	2.4e-72	244.4	0	1	257	289	536	289	537	0.97	99.6124
	Phvul.006G118300.1	-	722	PK_Tyr_Ser-Thr	PF07714.22	258	1.9e-70	238.2	0	1	1	2.8e-71	5.7e-70	236.6	0	2	258	443	694	442	694	0.97	99.6124
	Phvul.006G118300.2	-	722	PK_Tyr_Ser-Thr	PF07714.22	258	1.9e-70	238.2	0	1	1	2.8e-71	5.7e-70	236.6	0	2	258	443	694	442	694	0.95	99.6124
	Phvul.007G223500.1	-	836	PK_Tyr_Ser-Thr	PF07714.22	258	2e-70	238.1	0	1	1	1.6e-71	3.4e-70	237.3	0	2	258	563	816	562	816	0.95	99.6124
	Phvul.007G245500.5	-	651	PK_Tyr_Ser-Thr	PF07714.22	258	3.5e-65	220.9	0	1	1	2.8e-66	5.7e-65	220.2	0	2	258	389	642	388	642	0.95	99.6124
	Phvul.007G245500.2	-	655	PK_Tyr_Ser-Thr	PF07714.22	258	3.6e-65	220.8	0	1	1	2.8e-66	5.8e-65	220.2	0	2	258	393	646	392	646	0.95	99.6124
	Phvul.007G245500.3	-	655	PK_Tyr_Ser-Thr	PF07714.22	258	3.6e-65	220.8	0	1	1	2.8e-66	5.8e-65	220.2	0	2	258	393	646	392	646	0.95	99.6124
	Phvul.007G245500.4	-	655	PK_Tyr_Ser-Thr	PF07714.22	258	3.6e-65	220.8	0	1	1	2.8e-66	5.8e-65	220.2	0	2	258	393	646	392	646	0.94	99.6124
	Phvul.008G182800.1	-	944	PK_Tyr_Ser-Thr	PF07714.22	258	4.4e-65	220.5	0	1	1	3.3e-66	6.8e-65	219.9	0	2	258	675	928	674	928	0.94	99.6124
	Phvul.009G035800.1	-	921	PK_Tyr_Ser-Thr	PF07714.22	258	5.6e-65	220.2	0	1	1	4.2e-66	8.6e-65	219.6	0	2	258	652	905	651	905	0.96	99.6124
	Phvul.001G035100.1	-	937	PK_Tyr_Ser-Thr	PF07714.22	258	6.8e-65	219.9	0	1	1	4.9e-66	1e-64	219.4	0	2	258	671	922	670	922	0.93	99.6124
	Phvul.011G133650.6	-	731	PK_Tyr_Ser-Thr	PF07714.22	258	1.2e-61	209.3	0	1	1	8e-63	1.7e-61	208.8	0	2	258	476	723	475	723	0.93	99.6124
	Phvul.011G133650.5	-	763	PK_Tyr_Ser-Thr	PF07714.22	258	1.3e-61	209.2	0	1	1	8.8e-63	1.8e-61	208.7	0	2	258	508	755	507	755	0.93	99.6124
	Phvul.011G133650.3	-	786	PK_Tyr_Ser-Thr	PF07714.22	258	1.4e-61	209.1	0	1	1	9.3e-63	1.9e-61	208.6	0	2	258	531	778	530	778	0.93	99.6124
	Phvul.011G133650.4	-	786	PK_Tyr_Ser-Thr	PF07714.22	258	1.4e-61	209.1	0	1	1	9.3e-63	1.9e-61	208.6	0	2	258	531	778	530	778	0.93	99.6124
	Phvul.011G133650.1	-	818	PK_Tyr_Ser-Thr	PF07714.22	258	1.5e-61	209	0	1	1	1e-62	2.1e-61	208.5	0	2	258	563	810	562	810	0.93	99.6124
	Phvul.011G133650.2	-	818	PK_Tyr_Ser-Thr	PF07714.22	258	1.5e-61	209	0	1	1	1e-62	2.1e-61	208.5	0	2	258	563	810	562	810	0.91	99.6124
	Phvul.005G094900.1	-	805	PK_Tyr_Ser-Thr	PF07714.22	258	7.8e-61	206.6	0	1	1	5.8e-62	1.2e-60	206	0	2	258	550	797	549	797	0.91	99.6124
	Phvul.003G174700.1	-	1390	PK_Tyr_Ser-Thr	PF07714.22	258	8.6e-61	206.5	0	1	1	6e-62	1.2e-60	206	0	2	258	1101	1363	1100	1363	0.92	99.6124
	Phvul.007G050400.1	-	655	PK_Tyr_Ser-Thr	PF07714.22	258	4.7e-50	171.3	0	1	1	3.7e-51	7.5e-50	170.6	0	2	258	337	606	336	606	0.91	99.6124
	Phvul.011G202200.1	-	794	PK_Tyr_Ser-Thr	PF07714.22	258	6.5e-48	164.3	0	1	1	5.4e-49	1.1e-47	163.5	0	2	258	476	747	475	747	0.86	99.6124
	Phvul.001G048800.2	-	560	PK_Tyr_Ser-Thr	PF07714.22	258	4.6e-47	161.5	0	1	1	3.3e-48	6.8e-47	161	0	2	258	260	529	259	529	0.89	99.6124
	Phvul.007G213400.1	-	695	PK_Tyr_Ser-Thr	PF07714.22	258	5.6e-46	157.9	0	1	1	5e-47	1e-45	157.1	0	2	258	352	626	351	626	0.84	99.6124
	Phvul.006G068400.1	-	798	PK_Tyr_Ser-Thr	PF07714.22	258	7.7e-43	147.7	0	1	1	7.5e-44	1.6e-42	146.7	0	2	258	491	774	490	774	0.85	99.6124
	Phvul.008G223900.1	-	796	PK_Tyr_Ser-Thr	PF07714.22	258	1.3e-40	140.4	0	1	1	9.2e-42	1.9e-40	139.8	0	2	258	488	772	487	772	0.83	99.2248
	Phvul.004G154600.1	-	627	PK_Tyr_Ser-Thr	PF07714.22	258	8.4e-83	278.6	0.6	2	2	8.9e-47	1.8e-45	156.3	0	3	258	344	613	343	613	0.93	99.2248
	Phvul.002G112500.4	-	346	PK_Tyr_Ser-Thr	PF07714.22	258	1.3e-74	251.8	0	1	1	8.3e-76	1.7e-74	251.4	0	2	257	71	318	70	319	0.93	99.2248
	Phvul.002G112500.3	-	368	PK_Tyr_Ser-Thr	PF07714.22	258	1.5e-74	251.6	0	1	1	1e-75	2.1e-74	251.1	0	2	257	93	340	92	341	0.93	99.2248
	Phvul.002G112500.2	-	402	PK_Tyr_Ser-Thr	PF07714.22	258	1.9e-74	251.2	0	1	1	1.3e-75	2.7e-74	250.8	0	2	257	127	374	126	375	0.93	99.2248
	Phvul.002G112500.1	-	572	PK_Tyr_Ser-Thr	PF07714.22	258	4.4e-74	250.1	0	1	1	3.2e-75	6.7e-74	249.5	0	2	257	297	544	296	545	0.94	99.2248
	Phvul.009G020600.1	-	548	PK_Tyr_Ser-Thr	PF07714.22	258	2.5e-72	244.3	0	1	1	1.7e-73	3.4e-72	243.9	0	3	258	288	535	286	535	0.94	99.2248
	Phvul.009G020600.3	-	559	PK_Tyr_Ser-Thr	PF07714.22	258	2.6e-72	244.3	0	1	1	1.7e-73	3.6e-72	243.8	0	3	258	299	546	297	546	0.94	99.2248
	Phvul.009G020600.2	-	567	PK_Tyr_Ser-Thr	PF07714.22	258	2.7e-72	244.2	0	1	1	1.8e-73	3.7e-72	243.7	0	3	258	307	554	305	554	0.95	99.2248
	Phvul.001G186600.1	-	817	PK_Tyr_Ser-Thr	PF07714.22	258	2.8e-69	234.3	0	1	1	2.4e-70	5e-69	233.5	0	3	258	545	797	543	797	0.96	99.2248
	Phvul.004G151400.2	-	745	PK_Tyr_Ser-Thr	PF07714.22	258	7.5e-69	232.9	0	1	1	4.9e-70	1e-68	232.5	0	2	257	459	709	458	710	0.96	99.2248
	Phvul.004G151400.1	-	1030	PK_Tyr_Ser-Thr	PF07714.22	258	1.4e-68	232.1	0	1	1	8.9e-70	1.8e-68	231.6	0	2	257	744	994	743	995	0.97	99.2248
	Phvul.002G154800.6	-	584	PK_Tyr_Ser-Thr	PF07714.22	258	4.8e-66	223.7	0	1	1	3.4e-67	7.1e-66	223.2	0	1	256	314	564	314	566	0.97	99.2248
	Phvul.002G154800.5	-	591	PK_Tyr_Ser-Thr	PF07714.22	258	4.8e-66	223.7	0	1	1	3.5e-67	7.3e-66	223.1	0	1	256	321	571	321	573	0.97	99.2248
	Phvul.002G154800.3	-	680	PK_Tyr_Ser-Thr	PF07714.22	258	6.5e-66	223.3	0	1	1	4.8e-67	9.9e-66	222.7	0	1	256	410	660	410	662	0.97	99.2248
	Phvul.002G154800.1	-	687	PK_Tyr_Ser-Thr	PF07714.22	258	6.6e-66	223.3	0	1	1	4.9e-67	1e-65	222.6	0	1	256	417	667	417	669	0.97	99.2248
	Phvul.002G154800.4	-	680	PK_Tyr_Ser-Thr	PF07714.22	258	6.6e-66	223.3	0	1	1	4.8e-67	9.9e-66	222.7	0	1	256	410	660	410	662	0.97	99.2248
	Phvul.002G154800.2	-	730	PK_Tyr_Ser-Thr	PF07714.22	258	7.7e-66	223	0	1	1	5.6e-67	1.2e-65	222.5	0	1	256	460	710	460	712	0.89	99.2248
	Phvul.004G178600.1	-	416	PK_Tyr_Ser-Thr	PF07714.22	258	1.2e-64	219.1	0	1	1	7.6e-66	1.6e-64	218.8	0	2	257	136	388	135	389	0.89	99.2248
	Phvul.002G301900.1	-	416	PK_Tyr_Ser-Thr	PF07714.22	258	2.4e-64	218.2	0	1	1	1.5e-65	3.1e-64	217.8	0	2	257	136	388	135	389	0.9	99.2248
	Phvul.005G050200.1	-	1226	PK_Tyr_Ser-Thr	PF07714.22	258	9.4e-64	216.2	0	1	1	7.1e-65	1.5e-63	215.6	0	3	258	949	1210	947	1210	0.9	99.2248
	Phvul.011G176800.1	-	1242	PK_Tyr_Ser-Thr	PF07714.22	258	1e-62	212.8	0	1	1	9.3e-64	1.9e-62	211.9	0	3	258	962	1223	960	1223	0.9	99.2248
	Phvul.003G199400.1	-	386	PK_Tyr_Ser-Thr	PF07714.22	258	4e-62	210.9	0	1	1	4.4e-63	9.2e-62	209.7	0	3	258	85	357	83	357	0.91	99.2248
	Phvul.003G148100.1	-	1108	PK_Tyr_Ser-Thr	PF07714.22	258	5.2e-62	210.5	0	1	1	5.6e-63	1.2e-61	209.3	0	3	258	837	1098	835	1098	0.9	99.2248
	Phvul.005G050300.1	-	1220	PK_Tyr_Ser-Thr	PF07714.22	258	1.1e-61	209.5	0	1	1	8e-63	1.6e-61	208.8	0	3	258	940	1201	938	1201	0.9	99.2248
	Phvul.005G050300.3	-	1220	PK_Tyr_Ser-Thr	PF07714.22	258	1.1e-61	209.5	0	1	1	8e-63	1.6e-61	208.8	0	3	258	940	1201	938	1201	0.9	99.2248
	Phvul.005G050300.2	-	1261	PK_Tyr_Ser-Thr	PF07714.22	258	1.2e-61	209.3	0	1	1	8.4e-63	1.7e-61	208.8	0	3	258	981	1242	979	1242	0.89	99.2248
	Phvul.008G083700.1	-	368	PK_Tyr_Ser-Thr	PF07714.22	258	7.5e-60	203.4	0	1	1	4.4e-61	9e-60	203.1	0	3	258	53	312	51	312	0.89	99.2248
	Phvul.008G083700.3	-	368	PK_Tyr_Ser-Thr	PF07714.22	258	7.5e-60	203.4	0	1	1	4.4e-61	9e-60	203.1	0	3	258	53	312	51	312	0.9	99.2248
	Phvul.010G068300.1	-	370	PK_Tyr_Ser-Thr	PF07714.22	258	4.2e-59	201	0	1	1	2.5e-60	5.1e-59	200.7	0	3	258	55	314	53	314	0.89	99.2248
	Phvul.007G060400.1	-	380	PK_Tyr_Ser-Thr	PF07714.22	258	1.2e-55	189.7	0	1	1	7.8e-56	1.6e-54	186	0	3	258	78	351	76	351	0.86	99.2248
	Phvul.011G142200.1	-	436	PK_Tyr_Ser-Thr	PF07714.22	258	6.4e-52	177.4	0	1	1	5.6e-53	1.2e-51	176.6	0	3	258	115	376	113	376	0.92	99.2248
	Phvul.001G069900.1	-	351	PK_Tyr_Ser-Thr	PF07714.22	258	1.6e-49	169.6	0	1	1	1e-50	2.1e-49	169.2	0	3	258	17	285	15	285	0.95	99.2248
	Phvul.011G214400.1	-	812	PK_Tyr_Ser-Thr	PF07714.22	258	2.5e-49	168.9	0	1	1	1.6e-50	3.3e-49	168.5	0	3	258	524	792	522	792	0.91	99.2248
	Phvul.001G068800.1	-	411	PK_Tyr_Ser-Thr	PF07714.22	258	4.5e-49	168.1	0	1	1	2.9e-50	6.1e-49	167.7	0	3	258	89	357	87	357	0.91	99.2248
	Phvul.001G070200.1	-	428	PK_Tyr_Ser-Thr	PF07714.22	258	9.4e-49	167	0	1	1	6.3e-50	1.3e-48	166.6	0	3	258	106	374	104	374	0.89	99.2248
	Phvul.001G167700.1	-	786	PK_Tyr_Ser-Thr	PF07714.22	258	1e-48	166.9	0	1	1	1e-49	2.1e-48	165.9	0	3	258	385	655	383	655	0.88	99.2248
	Phvul.006G194300.1	-	710	PK_Tyr_Ser-Thr	PF07714.22	258	2.5e-48	165.7	0	1	1	1.7e-49	3.6e-48	165.1	0	2	257	394	662	393	663	0.9	99.2248
	Phvul.001G069200.1	-	384	PK_Tyr_Ser-Thr	PF07714.22	258	3e-48	165.4	0	1	1	2e-49	4.1e-48	164.9	0	3	258	62	330	60	330	0.9	99.2248
	Phvul.001G069500.1	-	339	PK_Tyr_Ser-Thr	PF07714.22	258	3.1e-48	165.3	0	1	1	2.1e-49	4.2e-48	164.9	0	3	258	17	285	16	285	0.9	99.2248
	Phvul.001G044900.3	-	386	PK_Tyr_Ser-Thr	PF07714.22	258	1.2e-47	163.4	0	1	1	1.3e-48	2.6e-47	162.3	0	3	258	83	358	81	358	0.9	99.2248
	Phvul.001G044900.4	-	386	PK_Tyr_Ser-Thr	PF07714.22	258	1.2e-47	163.4	0	1	1	1.3e-48	2.6e-47	162.3	0	3	258	83	358	81	358	0.9	99.2248
	Phvul.001G044900.5	-	386	PK_Tyr_Ser-Thr	PF07714.22	258	1.2e-47	163.4	0	1	1	1.3e-48	2.6e-47	162.3	0	3	258	83	358	81	358	0.93	99.2248
	Phvul.008G192900.1	-	505	PK_Tyr_Ser-Thr	PF07714.22	258	1.2e-47	163.4	0	1	1	7.8e-49	1.6e-47	163	0	3	258	190	459	188	459	0.93	99.2248
	Phvul.008G192900.2	-	505	PK_Tyr_Ser-Thr	PF07714.22	258	1.2e-47	163.4	0	1	1	7.8e-49	1.6e-47	163	0	3	258	190	459	188	459	0.87	99.2248
	Phvul.008G127374.1	-	843	PK_Tyr_Ser-Thr	PF07714.22	258	1.5e-47	163.1	0	1	1	1.2e-48	2.5e-47	162.4	0	2	257	527	796	526	797	0.91	99.2248
	Phvul.006G125300.2	-	678	PK_Tyr_Ser-Thr	PF07714.22	258	1.9e-47	162.8	0	1	1	1.4e-48	2.9e-47	162.1	0	2	257	366	633	365	634	0.91	99.2248
	Phvul.006G125300.1	-	680	PK_Tyr_Ser-Thr	PF07714.22	258	1.9e-47	162.8	0	1	1	1.4e-48	3e-47	162.1	0	2	257	366	633	365	634	0.87	99.2248
	Phvul.001G184100.1	-	634	PK_Tyr_Ser-Thr	PF07714.22	258	2.2e-47	162.6	0	1	1	2.4e-48	5e-47	161.4	0	3	258	351	624	349	624	0.85	99.2248
	Phvul.001G048050.2	-	584	PK_Tyr_Ser-Thr	PF07714.22	258	2.5e-47	162.4	0	1	1	1.7e-48	3.5e-47	161.9	0	3	258	286	554	284	554	0.85	99.2248
	Phvul.001G048050.3	-	572	PK_Tyr_Ser-Thr	PF07714.22	258	2.5e-47	162.4	0	1	1	1.8e-48	3.7e-47	161.8	0	3	258	274	542	273	542	0.85	99.2248
	Phvul.001G048050.1	-	637	PK_Tyr_Ser-Thr	PF07714.22	258	2.9e-47	162.1	0	1	1	2.1e-48	4.3e-47	161.6	0	3	258	339	607	337	607	0.85	99.2248
	Phvul.001G075600.1	-	698	PK_Tyr_Ser-Thr	PF07714.22	258	3.3e-47	162	0	1	1	2.3e-48	4.7e-47	161.5	0	3	258	395	663	394	663	0.87	99.2248
	Phvul.001G048600.2	-	561	PK_Tyr_Ser-Thr	PF07714.22	258	5e-47	161.4	0	1	1	3.4e-48	6.9e-47	160.9	0	3	258	263	531	261	531	0.92	99.2248
	Phvul.010G018300.2	-	886	PK_Tyr_Ser-Thr	PF07714.22	258	6.6e-47	161	0	1	1	4.6e-48	9.4e-47	160.5	0	3	258	599	868	597	868	0.87	99.2248
	Phvul.001G048600.1	-	625	PK_Tyr_Ser-Thr	PF07714.22	258	6.7e-47	161	0	1	1	4.6e-48	9.4e-47	160.5	0	3	258	327	595	325	595	0.92	99.2248
	Phvul.010G018300.1	-	904	PK_Tyr_Ser-Thr	PF07714.22	258	6.9e-47	160.9	0	1	1	4.8e-48	9.8e-47	160.4	0	3	258	617	886	615	886	0.87	99.2248
	Phvul.005G055000.1	-	383	PK_Tyr_Ser-Thr	PF07714.22	258	7.2e-47	160.9	0	1	1	5.3e-48	1.1e-46	160.3	0	3	258	45	313	43	313	0.86	99.2248
	Phvul.001G048800.1	-	621	PK_Tyr_Ser-Thr	PF07714.22	258	9.1e-47	160.5	0	1	1	6.6e-48	1.4e-46	160	0	3	258	322	590	320	590	0.89	99.2248
	Phvul.001G069248.1	-	399	PK_Tyr_Ser-Thr	PF07714.22	258	1.1e-46	160.2	0	1	1	7.6e-48	1.6e-46	159.8	0	3	258	89	357	87	357	0.88	99.2248
	Phvul.006G194100.1	-	819	PK_Tyr_Ser-Thr	PF07714.22	258	1.3e-46	160	0	1	1	9.8e-48	2e-46	159.4	0	3	258	502	771	500	771	0.88	99.2248
	Phvul.004G155600.1	-	644	PK_Tyr_Ser-Thr	PF07714.22	258	1.3e-46	160	0	1	1	9.6e-48	2e-46	159.4	0	3	258	345	616	343	616	0.85	99.2248
	Phvul.001G047800.1	-	331	PK_Tyr_Ser-Thr	PF07714.22	258	1.4e-46	159.9	0	1	1	9.1e-48	1.9e-46	159.5	0	3	258	33	301	31	301	0.9	99.2248
	Phvul.008G007900.1	-	683	PK_Tyr_Ser-Thr	PF07714.22	258	1.6e-46	159.7	0	1	1	1.1e-47	2.3e-46	159.2	0	3	258	359	630	357	630	0.9	99.2248
	Phvul.008G007900.3	-	680	PK_Tyr_Ser-Thr	PF07714.22	258	1.6e-46	159.7	0	1	1	1.1e-47	2.2e-46	159.2	0	3	258	356	627	354	627	0.9	99.2248
	Phvul.008G007900.2	-	675	PK_Tyr_Ser-Thr	PF07714.22	258	1.6e-46	159.7	0	1	1	1.1e-47	2.2e-46	159.3	0	3	258	351	622	349	622	0.88	99.2248
	Phvul.001G047900.1	-	641	PK_Tyr_Ser-Thr	PF07714.22	258	2.1e-46	159.4	0	1	1	1.4e-47	2.9e-46	158.9	0	3	258	335	603	333	603	0.87	99.2248
	Phvul.004G085800.1	-	838	PK_Tyr_Ser-Thr	PF07714.22	258	2.2e-46	159.3	0	1	1	1.5e-47	3.2e-46	158.8	0	3	258	488	760	487	760	0.89	99.2248
	Phvul.002G007600.1	-	1005	PK_Tyr_Ser-Thr	PF07714.22	258	2.2e-46	159.3	0	1	1	1.4e-47	2.9e-46	158.9	0	3	258	687	956	685	956	0.87	99.2248
	Phvul.001G049000.1	-	619	PK_Tyr_Ser-Thr	PF07714.22	258	2.3e-46	159.2	0	1	1	1.6e-47	3.2e-46	158.7	0	3	258	321	589	319	589	0.91	99.2248
	Phvul.008G211200.1	-	608	PK_Tyr_Ser-Thr	PF07714.22	258	2.3e-46	159.2	0	1	1	2e-47	4.1e-46	158.4	0	2	257	311	579	310	580	0.82	99.2248
	Phvul.002G218800.1	-	424	PK_Tyr_Ser-Thr	PF07714.22	258	4e-46	158.4	0	1	1	3.3e-47	6.8e-46	157.7	0	3	258	111	374	109	374	0.93	99.2248
	Phvul.008G175100.1	-	679	PK_Tyr_Ser-Thr	PF07714.22	258	4.7e-46	158.2	0	1	1	3.8e-47	7.9e-46	157.5	0	3	258	365	636	364	636	0.92	99.2248
	Phvul.008G174900.1	-	633	PK_Tyr_Ser-Thr	PF07714.22	258	5e-46	158.1	0	1	1	3.5e-47	7.3e-46	157.6	0	3	258	319	590	318	590	0.85	99.2248
	Phvul.001G222700.1	-	510	PK_Tyr_Ser-Thr	PF07714.22	258	5.8e-46	157.9	0	1	1	4.4e-47	9e-46	157.3	0	3	258	193	462	191	462	0.92	99.2248
	Phvul.008G174900.2	-	698	PK_Tyr_Ser-Thr	PF07714.22	258	6.2e-46	157.8	0	1	1	4.4e-47	9.1e-46	157.3	0	3	258	384	655	383	655	0.9	99.2248
	Phvul.001G214000.4	-	656	PK_Tyr_Ser-Thr	PF07714.22	258	7.3e-46	157.6	0	1	1	6.4e-47	1.3e-45	156.7	0	3	258	314	587	312	587	0.9	99.2248
	Phvul.001G214000.3	-	674	PK_Tyr_Ser-Thr	PF07714.22	258	7.9e-46	157.5	0	1	1	6.8e-47	1.4e-45	156.6	0	3	258	332	605	330	605	0.9	99.2248
	Phvul.001G214000.1	-	680	PK_Tyr_Ser-Thr	PF07714.22	258	8e-46	157.4	0	1	1	7e-47	1.4e-45	156.6	0	3	258	338	611	336	611	0.93	99.2248
	Phvul.005G064700.4	-	317	PK_Tyr_Ser-Thr	PF07714.22	258	8.5e-46	157.4	0	1	1	5.2e-47	1.1e-45	157	0	3	258	37	305	35	305	0.9	99.2248
	Phvul.001G214000.2	-	718	PK_Tyr_Ser-Thr	PF07714.22	258	9.2e-46	157.2	0	1	1	7.9e-47	1.6e-45	156.4	0	3	258	376	649	374	649	0.93	99.2248
	Phvul.005G064700.1	-	354	PK_Tyr_Ser-Thr	PF07714.22	258	1.2e-45	156.8	0	1	1	7.6e-47	1.6e-45	156.5	0	3	258	74	342	72	342	0.93	99.2248
	Phvul.005G064700.2	-	354	PK_Tyr_Ser-Thr	PF07714.22	258	1.2e-45	156.8	0	1	1	7.6e-47	1.6e-45	156.5	0	3	258	74	342	72	342	0.93	99.2248
	Phvul.005G064700.3	-	354	PK_Tyr_Ser-Thr	PF07714.22	258	1.2e-45	156.8	0	1	1	7.6e-47	1.6e-45	156.5	0	3	258	74	342	72	342	0.94	99.2248
	Phvul.010G031900.1	-	812	PK_Tyr_Ser-Thr	PF07714.22	258	1.5e-45	156.5	0.6	1	1	1.3e-46	2.7e-45	155.7	0	3	258	521	790	520	790	0.88	99.2248
	Phvul.001G049200.1	-	330	PK_Tyr_Ser-Thr	PF07714.22	258	1.5e-45	156.5	0	1	1	1.1e-46	2.2e-45	156	0	3	258	31	299	29	299	0.89	99.2248
	Phvul.007G220800.1	-	371	PK_Tyr_Ser-Thr	PF07714.22	258	2.1e-45	156.1	0	1	1	1.4e-46	2.9e-45	155.6	0	3	258	48	318	46	318	0.84	99.2248
	Phvul.001G048900.1	-	633	PK_Tyr_Ser-Thr	PF07714.22	258	2.9e-45	155.6	0	1	1	2.1e-46	4.3e-45	155.1	0	3	258	323	591	321	591	0.93	99.2248
	Phvul.006G029000.1	-	1017	PK_Tyr_Ser-Thr	PF07714.22	258	3e-45	155.6	0	1	1	1.9e-46	3.9e-45	155.2	0	3	258	735	1005	733	1005	0.93	99.2248
	Phvul.005G162500.1	-	882	PK_Tyr_Ser-Thr	PF07714.22	258	3.2e-45	155.4	0	1	1	3.3e-46	6.8e-45	154.4	0	3	258	577	844	576	844	0.83	99.2248
	Phvul.004G155100.1	-	362	PK_Tyr_Ser-Thr	PF07714.22	258	4e-45	155.1	0	1	1	3.5e-46	7.2e-45	154.3	0	3	258	64	335	63	335	0.91	99.2248
	Phvul.010G032000.1	-	832	PK_Tyr_Ser-Thr	PF07714.22	258	4.7e-45	154.9	0	1	1	4.3e-46	8.9e-45	154	0	3	258	541	810	540	810	0.87	99.2248
	Phvul.003G231350.1	-	1017	PK_Tyr_Ser-Thr	PF07714.22	258	6.8e-45	154.4	0	1	1	4.5e-46	9.3e-45	153.9	0	3	258	695	964	693	964	0.87	99.2248
	Phvul.003G231350.2	-	1017	PK_Tyr_Ser-Thr	PF07714.22	258	6.8e-45	154.4	0	1	1	4.5e-46	9.3e-45	153.9	0	3	258	695	964	693	964	0.87	99.2248
	Phvul.003G231350.3	-	1017	PK_Tyr_Ser-Thr	PF07714.22	258	6.8e-45	154.4	0	1	1	4.5e-46	9.3e-45	153.9	0	3	258	695	964	693	964	0.87	99.2248
	Phvul.003G231350.4	-	1017	PK_Tyr_Ser-Thr	PF07714.22	258	6.8e-45	154.4	0	1	1	4.5e-46	9.3e-45	153.9	0	3	258	695	964	693	964	0.87	99.2248
	Phvul.003G231400.1	-	1018	PK_Tyr_Ser-Thr	PF07714.22	258	6.8e-45	154.4	0	1	1	4.5e-46	9.3e-45	153.9	0	3	258	695	964	693	964	0.93	99.2248
	Phvul.008G117700.1	-	672	PK_Tyr_Ser-Thr	PF07714.22	258	8.8e-45	154	0	1	1	5.8e-46	1.2e-44	153.6	0	3	258	336	604	334	604	0.85	99.2248
	Phvul.004G155400.2	-	599	PK_Tyr_Ser-Thr	PF07714.22	258	8.9e-45	154	0	1	1	7e-46	1.4e-44	153.3	0	3	258	300	572	299	572	0.92	99.2248
	Phvul.005G162000.1	-	915	PK_Tyr_Ser-Thr	PF07714.22	258	1.2e-44	153.6	0	1	1	8.8e-46	1.8e-44	153	0	3	258	611	875	609	875	0.83	99.2248
	Phvul.004G154900.1	-	525	PK_Tyr_Ser-Thr	PF07714.22	258	1.2e-44	153.6	0	1	1	1.2e-45	2.4e-44	152.6	0	3	258	231	502	230	502	0.86	99.2248
	Phvul.002G318200.1	-	631	PK_Tyr_Ser-Thr	PF07714.22	258	1.2e-44	153.6	0	1	1	8e-46	1.7e-44	153.1	0	3	258	327	598	325	598	0.86	99.2248
	Phvul.008G079800.1	-	956	PK_Tyr_Ser-Thr	PF07714.22	258	2.2e-44	152.7	0	1	1	1.5e-45	3.1e-44	152.3	0	3	258	620	890	618	890	0.91	99.2248
	Phvul.001G051100.1	-	812	PK_Tyr_Ser-Thr	PF07714.22	258	2.5e-44	152.6	0	1	1	1.7e-45	3.5e-44	152.1	0	3	258	495	763	493	763	0.85	99.2248
	Phvul.001G075800.2	-	687	PK_Tyr_Ser-Thr	PF07714.22	258	3.2e-44	152.2	0	1	1	2.7e-45	5.6e-44	151.4	0	3	258	376	645	375	645	0.91	99.2248
	Phvul.008G211100.2	-	347	PK_Tyr_Ser-Thr	PF07714.22	258	4.9e-44	151.6	0	1	1	3.6e-45	7.3e-44	151	0	2	257	52	320	51	321	0.84	99.2248
	Phvul.001G039300.1	-	454	PK_Tyr_Ser-Thr	PF07714.22	258	8.8e-44	150.7	0	1	1	6e-45	1.2e-43	150.3	0	1	256	176	443	176	445	0.83	99.2248
	Phvul.010G028300.1	-	466	PK_Tyr_Ser-Thr	PF07714.22	258	8.9e-44	150.7	0	1	1	7.3e-45	1.5e-43	150	0	3	258	168	439	167	439	0.89	99.2248
	Phvul.008G175200.1	-	609	PK_Tyr_Ser-Thr	PF07714.22	258	1.7e-43	149.8	0	1	1	1.2e-44	2.5e-43	149.3	0	3	258	306	573	305	573	0.87	99.2248
	Phvul.008G244400.1	-	942	PK_Tyr_Ser-Thr	PF07714.22	258	2.8e-43	149.1	0	1	1	1.8e-44	3.7e-43	148.7	0	3	258	615	882	613	882	0.89	99.2248
	Phvul.004G124100.1	-	324	PK_Tyr_Ser-Thr	PF07714.22	258	4.1e-43	148.6	0	1	1	4.1e-44	8.5e-43	147.5	0	2	257	47	316	46	317	0.89	99.2248
	Phvul.004G124100.2	-	324	PK_Tyr_Ser-Thr	PF07714.22	258	4.1e-43	148.6	0	1	1	4.1e-44	8.5e-43	147.5	0	2	257	47	316	46	317	0.87	99.2248
	Phvul.001G048200.1	-	590	PK_Tyr_Ser-Thr	PF07714.22	258	3.2e-42	145.6	0	1	1	2.7e-43	5.6e-42	144.8	0	3	258	291	559	290	559	0.87	99.2248
	Phvul.008G077600.1	-	845	PK_Tyr_Ser-Thr	PF07714.22	258	4.5e-42	145.1	0	1	1	4.2e-43	8.6e-42	144.2	0	3	258	530	791	528	791	0.9	99.2248
	Phvul.010G122100.2	-	683	PK_Tyr_Ser-Thr	PF07714.22	258	1.3e-41	143.7	0	1	1	9.8e-43	2e-41	143	0	3	258	379	649	377	649	0.9	99.2248
	Phvul.010G122100.1	-	718	PK_Tyr_Ser-Thr	PF07714.22	258	1.4e-41	143.5	0	1	1	1.1e-42	2.2e-41	142.9	0	3	258	414	684	412	684	0.84	99.2248
	Phvul.009G068100.1	-	797	PK_Tyr_Ser-Thr	PF07714.22	258	2.3e-41	142.8	0	1	1	1.1e-41	2.2e-40	139.6	0	3	258	512	787	511	787	0.9	99.2248
	Phvul.009G068300.1	-	809	PK_Tyr_Ser-Thr	PF07714.22	258	3.2e-41	142.4	0	1	1	3.7e-42	7.6e-41	141.1	0	3	258	516	790	515	790	0.89	99.2248
	Phvul.008G124300.1	-	785	PK_Tyr_Ser-Thr	PF07714.22	258	4.6e-41	141.8	0	1	1	8.4e-42	1.7e-40	140	0	3	258	509	780	508	780	0.9	99.2248
	Phvul.003G251900.1	-	400	PK_Tyr_Ser-Thr	PF07714.22	258	5.5e-41	141.6	0	1	1	3.5e-42	7.2e-41	141.2	0	3	258	60	316	58	316	0.89	99.2248
	Phvul.011G109100.2	-	637	PK_Tyr_Ser-Thr	PF07714.22	258	1.4e-40	140.2	0	1	1	1e-41	2.1e-40	139.7	0	3	258	308	576	306	576	0.9	99.2248
	Phvul.009G260900.3	-	698	PK_Tyr_Ser-Thr	PF07714.22	258	1.7e-40	140	0	1	1	1.3e-41	2.6e-40	139.4	0	3	258	394	664	392	664	0.9	99.2248
	Phvul.009G260900.1	-	720	PK_Tyr_Ser-Thr	PF07714.22	258	1.8e-40	139.9	0	1	1	1.3e-41	2.8e-40	139.3	0	3	258	416	686	414	686	0.88	99.2248
	Phvul.001G076200.1	-	594	PK_Tyr_Ser-Thr	PF07714.22	258	2e-40	139.7	0	1	1	1.6e-41	3.4e-40	139	0	3	258	283	551	282	551	0.9	99.2248
	Phvul.005G110400.1	-	834	PK_Tyr_Ser-Thr	PF07714.22	258	2.2e-39	136.4	0	1	1	1.6e-40	3.4e-39	135.7	0	3	258	498	767	496	767	0.88	99.2248
	Phvul.001G069216.1	-	368	PK_Tyr_Ser-Thr	PF07714.22	258	3.1e-39	135.8	0.1	1	1	7.5e-40	1.6e-38	133.6	0.1	3	258	60	314	59	314	0.87	99.2248
	Phvul.008G124800.1	-	768	PK_Tyr_Ser-Thr	PF07714.22	258	7.6e-39	134.6	0	1	1	7.2e-40	1.5e-38	133.6	0	3	258	487	759	486	759	0.86	99.2248
	Phvul.008G017400.1	-	1018	PK_Tyr_Ser-Thr	PF07714.22	258	2.8e-37	129.5	0	1	1	1.9e-38	3.9e-37	129	0	3	258	733	1004	731	1004	0.73	99.2248
	Phvul.009G114500.1	-	981	PK_Tyr_Ser-Thr	PF07714.22	258	5.4e-37	128.5	0	1	1	7.3e-38	1.5e-36	127.1	0	3	258	667	953	665	953	0.75	99.2248
	Phvul.006G198200.1	-	968	PK_Tyr_Ser-Thr	PF07714.22	258	3.9e-35	122.4	0	1	1	4e-36	8.3e-35	121.3	0	3	258	668	951	666	951	0.87	99.2248
	Phvul.002G002200.1	-	338	PK_Tyr_Ser-Thr	PF07714.22	258	1.3e-34	120.7	0	1	1	1e-35	2.2e-34	120	0	3	258	8	260	6	260	0.87	99.2248
	Phvul.002G002200.2	-	338	PK_Tyr_Ser-Thr	PF07714.22	258	1.3e-34	120.7	0	1	1	1e-35	2.2e-34	120	0	3	258	8	260	6	260	0.9	99.2248
	Phvul.009G092300.1	-	620	PK_Tyr_Ser-Thr	PF07714.22	258	4.2e-31	109.2	0	1	1	2.7e-32	5.5e-31	108.8	0	1	256	43	305	43	307	0.9	99.2248
	Phvul.009G092300.2	-	620	PK_Tyr_Ser-Thr	PF07714.22	258	4.2e-31	109.2	0	1	1	2.7e-32	5.5e-31	108.8	0	1	256	43	305	43	307	0.85	99.2248
	Phvul.001G050700.1	-	632	PK_Tyr_Ser-Thr	PF07714.22	258	1e-26	94.9	0	1	1	6.4e-28	1.3e-26	94.5	0	1	256	45	308	45	310	0.85	99.2248
	Phvul.001G245300.1	-	643	PK_Tyr_Ser-Thr	PF07714.22	258	5.2e-25	89.2	0.1	1	1	4.6e-25	9.5e-24	85.1	0.1	3	258	355	612	354	612	0.79	99.2248
	Phvul.002G217900.1	-	611	PK_Tyr_Ser-Thr	PF07714.22	258	6.1e-24	85.7	0	1	1	1.2e-23	2.5e-22	80.5	0	2	257	328	578	327	579	0.79	99.2248
	Phvul.008G221900.1	-	631	PK_Tyr_Ser-Thr	PF07714.22	258	2.6e-22	80.4	0	1	1	6.2e-22	1.3e-20	74.8	0	3	258	348	603	347	603	0.89	98.8372
	Phvul.006G019900.1	-	1607	PK_Tyr_Ser-Thr	PF07714.22	258	5.1e-119	397.3	1.2	3	3	1.4e-38	2.9e-37	129.4	0	4	258	1222	1483	1219	1483	0.92	98.8372
	Phvul.003G082800.1	-	381	PK_Tyr_Ser-Thr	PF07714.22	258	7.1e-66	223.2	0	1	1	4.5e-67	9.3e-66	222.8	0	4	258	87	338	84	338	0.91	98.8372
	Phvul.006G144200.1	-	375	PK_Tyr_Ser-Thr	PF07714.22	258	3.4e-65	220.9	0.1	1	1	2.9e-66	6.1e-65	220.1	0	4	258	80	331	77	331	0.91	98.8372
	Phvul.006G144200.2	-	375	PK_Tyr_Ser-Thr	PF07714.22	258	3.4e-65	220.9	0.1	1	1	2.9e-66	6.1e-65	220.1	0	4	258	80	331	77	331	0.92	98.8372
	Phvul.009G179100.1	-	357	PK_Tyr_Ser-Thr	PF07714.22	258	1.3e-64	219	0	1	1	7.5e-66	1.5e-64	218.8	0	4	258	60	311	57	311	0.91	98.8372
	Phvul.008G122700.1	-	1260	PK_Tyr_Ser-Thr	PF07714.22	258	3.3e-63	214.4	0	1	1	2.6e-64	5.4e-63	213.7	0	4	258	979	1239	976	1239	0.9	98.8372
	Phvul.004G016900.1	-	366	PK_Tyr_Ser-Thr	PF07714.22	258	6.1e-62	210.3	0	1	1	9.3e-63	1.9e-61	208.6	0	3	257	65	336	63	337	0.92	98.8372
	Phvul.002G169100.1	-	427	PK_Tyr_Ser-Thr	PF07714.22	258	1e-61	209.5	0	1	1	6.6e-63	1.4e-61	209.1	0	4	258	154	409	151	409	0.86	98.8372
	Phvul.005G090000.1	-	431	PK_Tyr_Ser-Thr	PF07714.22	258	2.5e-51	175.5	0	1	1	1.9e-52	3.9e-51	174.8	0	3	257	115	374	113	375	0.86	98.8372
	Phvul.005G090000.2	-	431	PK_Tyr_Ser-Thr	PF07714.22	258	2.5e-51	175.5	0	1	1	1.9e-52	3.9e-51	174.8	0	3	257	115	374	113	375	0.86	98.8372
	Phvul.005G090000.3	-	431	PK_Tyr_Ser-Thr	PF07714.22	258	2.5e-51	175.5	0	1	1	1.9e-52	3.9e-51	174.8	0	3	257	115	374	113	375	0.92	98.8372
	Phvul.006G066611.1	-	386	PK_Tyr_Ser-Thr	PF07714.22	258	1.1e-50	173.4	0	1	1	7.2e-52	1.5e-50	173	0	4	258	65	335	62	335	0.93	98.8372
	Phvul.005G167700.1	-	780	PK_Tyr_Ser-Thr	PF07714.22	258	1.4e-50	173.1	0	1	1	9.2e-52	1.9e-50	172.6	0	4	258	465	733	462	733	0.92	98.8372
	Phvul.006G066500.1	-	451	PK_Tyr_Ser-Thr	PF07714.22	258	1.7e-50	172.7	0	1	1	1.1e-51	2.3e-50	172.3	0	4	258	130	400	127	400	0.92	98.8372
	Phvul.L001761.1	-	451	PK_Tyr_Ser-Thr	PF07714.22	258	1.7e-50	172.7	0	1	1	1.1e-51	2.3e-50	172.3	0	4	258	130	400	127	400	0.93	98.8372
	Phvul.009G131700.1	-	727	PK_Tyr_Ser-Thr	PF07714.22	258	4.1e-50	171.5	0	1	1	2.7e-51	5.5e-50	171.1	0	4	258	404	671	401	671	0.9	98.8372
	Phvul.011G176700.1	-	790	PK_Tyr_Ser-Thr	PF07714.22	258	5.1e-50	171.2	0	1	1	4.4e-51	9.2e-50	170.4	0	4	258	476	744	473	744	0.92	98.8372
	Phvul.009G232100.3	-	919	PK_Tyr_Ser-Thr	PF07714.22	258	5.8e-50	171	0	1	1	4.8e-51	9.8e-50	170.3	0	4	258	539	809	536	809	0.92	98.8372
	Phvul.009G232100.8	-	920	PK_Tyr_Ser-Thr	PF07714.22	258	5.8e-50	171	0	1	1	4.8e-51	9.8e-50	170.3	0	4	258	540	810	537	810	0.9	98.8372
	Phvul.007G030800.1	-	606	PK_Tyr_Ser-Thr	PF07714.22	258	8.3e-50	170.5	0	1	1	5.7e-51	1.2e-49	170	0	4	258	312	578	309	578	0.92	98.8372
	Phvul.009G232100.2	-	1112	PK_Tyr_Ser-Thr	PF07714.22	258	8.6e-50	170.4	0	1	1	6.8e-51	1.4e-49	169.8	0	4	258	732	1002	729	1002	0.92	98.8372
	Phvul.009G232100.7	-	1112	PK_Tyr_Ser-Thr	PF07714.22	258	8.6e-50	170.4	0	1	1	6.8e-51	1.4e-49	169.8	0	4	258	732	1002	729	1002	0.92	98.8372
	Phvul.009G232100.6	-	1113	PK_Tyr_Ser-Thr	PF07714.22	258	8.6e-50	170.4	0	1	1	6.8e-51	1.4e-49	169.8	0	4	258	733	1003	730	1003	0.88	98.8372
	Phvul.006G084400.1	-	682	PK_Tyr_Ser-Thr	PF07714.22	258	9.2e-50	170.3	0	1	1	6e-51	1.2e-49	169.9	0	4	258	365	633	362	633	0.92	98.8372
	Phvul.009G232100.5	-	1274	PK_Tyr_Ser-Thr	PF07714.22	258	1.1e-49	170.1	0	1	1	8.5e-51	1.8e-49	169.4	0	4	258	894	1164	891	1164	0.92	98.8372
	Phvul.009G232100.4	-	1281	PK_Tyr_Ser-Thr	PF07714.22	258	1.1e-49	170.1	0	1	1	8.6e-51	1.8e-49	169.4	0	4	258	901	1171	898	1171	0.92	98.8372
	Phvul.009G232100.1	-	1282	PK_Tyr_Ser-Thr	PF07714.22	258	1.1e-49	170.1	0	1	1	8.6e-51	1.8e-49	169.4	0	4	258	902	1172	899	1172	0.9	98.8372
	Phvul.008G031300.1	-	339	PK_Tyr_Ser-Thr	PF07714.22	258	1.7e-49	169.5	0	1	1	1.1e-50	2.3e-49	169	0	4	258	47	311	44	311	0.85	98.8372
	Phvul.003G273700.1	-	965	PK_Tyr_Ser-Thr	PF07714.22	258	2.1e-49	169.2	0	1	1	2.5e-50	5.1e-49	167.9	0	4	258	632	899	629	899	0.87	98.8372
	Phvul.011G169332.3	-	1014	PK_Tyr_Ser-Thr	PF07714.22	258	2.1e-49	169.2	0	1	1	2.3e-50	4.7e-49	168	0	2	256	685	949	684	951	0.87	98.8372
	Phvul.011G169332.5	-	1014	PK_Tyr_Ser-Thr	PF07714.22	258	2.1e-49	169.2	0	1	1	2.3e-50	4.7e-49	168	0	2	256	685	949	684	951	0.87	98.8372
	Phvul.011G169332.4	-	1014	PK_Tyr_Ser-Thr	PF07714.22	258	2.1e-49	169.2	0	1	1	2.3e-50	4.7e-49	168	0	2	256	685	949	684	951	0.86	98.8372
	Phvul.011G169332.1	-	1038	PK_Tyr_Ser-Thr	PF07714.22	258	2.2e-49	169.1	0	1	1	2.4e-50	4.9e-49	168	0	2	256	709	973	708	975	0.86	98.8372
	Phvul.011G169332.2	-	1038	PK_Tyr_Ser-Thr	PF07714.22	258	2.2e-49	169.1	0	1	1	2.4e-50	4.9e-49	168	0	2	256	709	973	708	975	0.86	98.8372
	Phvul.005G088700.3	-	781	PK_Tyr_Ser-Thr	PF07714.22	258	2.5e-49	168.9	0	1	1	2.3e-50	4.7e-49	168	0	2	256	464	732	463	734	0.86	98.8372
	Phvul.005G088700.1	-	819	PK_Tyr_Ser-Thr	PF07714.22	258	2.7e-49	168.8	0	1	1	2.5e-50	5.2e-49	167.9	0	2	256	502	770	501	772	0.92	98.8372
	Phvul.011G067401.1	-	562	PK_Tyr_Ser-Thr	PF07714.22	258	3.3e-49	168.5	0	1	1	2.3e-50	4.8e-49	168	0	4	258	218	486	215	486	0.92	98.8372
	Phvul.008G127237.1	-	457	PK_Tyr_Ser-Thr	PF07714.22	258	4e-49	168.3	0	1	1	3.6e-50	7.4e-49	167.4	0	4	258	142	410	139	410	0.95	98.8372
	Phvul.003G060600.1	-	547	PK_Tyr_Ser-Thr	PF07714.22	258	1.4e-48	166.5	0	1	1	8.8e-50	1.8e-48	166.1	0	4	258	199	469	196	469	0.9	98.8372
	Phvul.004G154800.1	-	704	PK_Tyr_Ser-Thr	PF07714.22	258	2.4e-48	165.7	0	1	1	1.9e-49	3.9e-48	165	0	4	258	383	652	380	652	0.92	98.8372
	Phvul.010G149300.1	-	566	PK_Tyr_Ser-Thr	PF07714.22	258	4.1e-48	164.9	0	1	1	3.2e-49	6.6e-48	164.3	0	4	258	205	475	202	475	0.89	98.8372
	Phvul.007G030700.1	-	614	PK_Tyr_Ser-Thr	PF07714.22	258	5.1e-48	164.6	0	1	1	5e-49	1e-47	163.6	0	4	258	272	541	269	541	0.9	98.8372
	Phvul.008G077500.2	-	873	PK_Tyr_Ser-Thr	PF07714.22	258	8e-48	164	0.3	1	1	1.1e-48	2.2e-47	162.6	0	3	257	549	818	547	819	0.9	98.8372
	Phvul.008G077500.1	-	918	PK_Tyr_Ser-Thr	PF07714.22	258	8.9e-48	163.8	0.2	1	1	1.2e-48	2.4e-47	162.4	0	3	257	594	863	592	864	0.81	98.8372
	Phvul.005G014900.1	-	661	PK_Tyr_Ser-Thr	PF07714.22	258	1.1e-47	163.6	0	1	1	1.1e-48	2.2e-47	162.6	0	4	258	346	614	343	614	0.88	98.8372
	Phvul.009G233300.2	-	423	PK_Tyr_Ser-Thr	PF07714.22	258	1.3e-47	163.3	0	1	1	9.3e-49	1.9e-47	162.8	0	3	257	114	382	112	383	0.91	98.8372
	Phvul.011G169300.1	-	1030	PK_Tyr_Ser-Thr	PF07714.22	258	1.4e-47	163.2	0	1	1	9e-49	1.9e-47	162.8	0	2	256	691	955	690	957	0.88	98.8372
	Phvul.009G233300.1	-	446	PK_Tyr_Ser-Thr	PF07714.22	258	1.4e-47	163.2	0	1	1	1.1e-48	2.2e-47	162.5	0	3	257	137	405	135	406	0.9	98.8372
	Phvul.007G204300.1	-	506	PK_Tyr_Ser-Thr	PF07714.22	258	2.1e-47	162.7	0	1	1	1.4e-48	2.8e-47	162.2	0	4	258	191	459	188	459	0.9	98.8372
	Phvul.007G204300.2	-	519	PK_Tyr_Ser-Thr	PF07714.22	258	2.2e-47	162.6	0	1	1	1.5e-48	3e-47	162.1	0	4	258	191	459	188	459	0.9	98.8372
	Phvul.004G125200.1	-	901	PK_Tyr_Ser-Thr	PF07714.22	258	2.8e-47	162.2	0	1	1	2.3e-48	4.6e-47	161.5	0	4	258	577	846	574	846	0.9	98.8372
	Phvul.001G176800.1	-	375	PK_Tyr_Ser-Thr	PF07714.22	258	4.6e-47	161.5	0	1	1	2.8e-48	5.9e-47	161.2	0	4	258	51	320	48	320	0.92	98.8372
	Phvul.010G138900.1	-	857	PK_Tyr_Ser-Thr	PF07714.22	258	5e-47	161.4	0	1	1	3.7e-48	7.7e-47	160.8	0	4	258	469	739	466	739	0.89	98.8372
	Phvul.007G031000.1	-	658	PK_Tyr_Ser-Thr	PF07714.22	258	5.2e-47	161.3	0	1	1	3.7e-48	7.7e-47	160.8	0	3	257	327	596	325	597	0.88	98.8372
	Phvul.002G115900.1	-	393	PK_Tyr_Ser-Thr	PF07714.22	258	5.5e-47	161.3	0	1	1	4.3e-48	8.9e-47	160.6	0	4	258	87	366	84	366	0.9	98.8372
	Phvul.007G051200.1	-	663	PK_Tyr_Ser-Thr	PF07714.22	258	5.9e-47	161.1	0	1	1	4.2e-48	8.7e-47	160.6	0	4	258	341	609	338	609	0.92	98.8372
	Phvul.007G067700.1	-	1290	PK_Tyr_Ser-Thr	PF07714.22	258	6e-47	161.1	0	1	1	3.9e-48	8e-47	160.7	0	4	258	1015	1284	1012	1284	0.92	98.8372
	Phvul.007G051300.1	-	669	PK_Tyr_Ser-Thr	PF07714.22	258	6.6e-47	161	0	1	1	4.7e-48	9.7e-47	160.4	0	4	258	346	614	343	614	0.88	98.8372
	Phvul.011G175200.1	-	812	PK_Tyr_Ser-Thr	PF07714.22	258	7.7e-47	160.8	0	1	1	6.8e-48	1.4e-46	159.9	0	4	258	489	756	486	756	0.89	98.8372
	Phvul.006G137300.1	-	704	PK_Tyr_Ser-Thr	PF07714.22	258	9.1e-47	160.5	0.1	1	1	7.6e-48	1.6e-46	159.8	0.1	3	257	380	645	378	646	0.95	98.8372
	Phvul.002G143400.1	-	919	PK_Tyr_Ser-Thr	PF07714.22	258	9.9e-47	160.4	0	1	1	7.4e-48	1.5e-46	159.8	0	4	258	593	862	591	862	0.9	98.8372
	Phvul.007G030900.1	-	654	PK_Tyr_Ser-Thr	PF07714.22	258	1e-46	160.3	0	1	1	8.2e-48	1.7e-46	159.7	0	4	258	331	601	328	601	0.9	98.8372
	Phvul.006G080500.1	-	951	PK_Tyr_Ser-Thr	PF07714.22	258	1.4e-46	159.9	0	1	1	9.2e-48	1.9e-46	159.5	0	4	258	621	887	618	887	0.91	98.8372
	Phvul.008G021001.1	-	432	PK_Tyr_Ser-Thr	PF07714.22	258	1.6e-46	159.7	0	1	1	1.1e-47	2.3e-46	159.2	0	4	258	87	357	84	357	0.89	98.8372
	Phvul.001G048400.1	-	299	PK_Tyr_Ser-Thr	PF07714.22	258	2.2e-46	159.3	0	1	1	1.7e-47	3.4e-46	158.7	0	4	258	6	273	4	273	0.86	98.8372
	Phvul.001G048500.1	-	459	PK_Tyr_Ser-Thr	PF07714.22	258	2.4e-46	159.2	0	1	1	1.7e-47	3.5e-46	158.6	0	4	258	162	428	160	428	0.91	98.8372
	Phvul.006G032300.1	-	510	PK_Tyr_Ser-Thr	PF07714.22	258	2.5e-46	159.1	0	1	1	2.3e-47	4.7e-46	158.2	0	4	258	191	459	188	459	0.92	98.8372
	Phvul.002G207000.1	-	618	PK_Tyr_Ser-Thr	PF07714.22	258	2.6e-46	159	0	1	1	1.7e-47	3.6e-46	158.6	0	4	258	296	567	293	567	0.85	98.8372
	Phvul.011G175000.1	-	807	PK_Tyr_Ser-Thr	PF07714.22	258	2.9e-46	158.9	0	1	1	3.2e-47	6.5e-46	157.7	0	3	257	490	757	488	758	0.9	98.8372
	Phvul.006G170500.4	-	907	PK_Tyr_Ser-Thr	PF07714.22	258	3.2e-46	158.8	0	1	1	2.1e-47	4.3e-46	158.3	0	4	258	566	834	563	834	0.9	98.8372
	Phvul.006G170500.2	-	931	PK_Tyr_Ser-Thr	PF07714.22	258	3.3e-46	158.7	0	1	1	2.2e-47	4.5e-46	158.3	0	4	258	590	858	587	858	0.92	98.8372
	Phvul.008G117800.1	-	668	PK_Tyr_Ser-Thr	PF07714.22	258	3.5e-46	158.6	0	1	1	2.4e-47	5e-46	158.1	0	4	258	344	611	341	611	0.9	98.8372
	Phvul.006G170500.3	-	1011	PK_Tyr_Ser-Thr	PF07714.22	258	3.8e-46	158.5	0	1	1	2.6e-47	5.3e-46	158	0	4	258	670	938	667	938	0.9	98.8372
	Phvul.006G170500.1	-	1015	PK_Tyr_Ser-Thr	PF07714.22	258	3.8e-46	158.5	0	1	1	2.6e-47	5.3e-46	158	0	4	258	674	942	671	942	0.86	98.8372
	Phvul.002G182500.1	-	659	PK_Tyr_Ser-Thr	PF07714.22	258	4.3e-46	158.3	0	1	1	6.3e-47	1.3e-45	156.7	0	4	258	342	610	339	610	0.91	98.8372
	Phvul.L005401.1	-	703	PK_Tyr_Ser-Thr	PF07714.22	258	7.9e-46	157.5	0	1	1	5.6e-47	1.1e-45	156.9	0	2	256	14	270	13	272	0.92	98.8372
	Phvul.002G206900.3	-	546	PK_Tyr_Ser-Thr	PF07714.22	258	8.8e-46	157.3	0	1	1	5.6e-47	1.2e-45	156.9	0	4	258	227	498	224	498	0.91	98.8372
	Phvul.003G139200.1	-	462	PK_Tyr_Ser-Thr	PF07714.22	258	1.1e-45	157	0	1	1	1e-46	2.1e-45	156.1	0	4	258	160	430	157	430	0.86	98.8372
	Phvul.002G318300.1	-	666	PK_Tyr_Ser-Thr	PF07714.22	258	1.1e-45	157	0	1	1	9.5e-47	2e-45	156.2	0	3	257	351	626	350	627	0.92	98.8372
	Phvul.002G206900.1	-	618	PK_Tyr_Ser-Thr	PF07714.22	258	1.2e-45	156.9	0	1	1	7.6e-47	1.6e-45	156.5	0	4	258	299	570	296	570	0.92	98.8372
	Phvul.002G206900.2	-	618	PK_Tyr_Ser-Thr	PF07714.22	258	1.2e-45	156.9	0	1	1	7.6e-47	1.6e-45	156.5	0	4	258	299	570	296	570	0.88	98.8372
	Phvul.003G121000.1	-	504	PK_Tyr_Ser-Thr	PF07714.22	258	1.3e-45	156.8	0	1	1	8.9e-47	1.8e-45	156.3	0	4	258	185	453	182	453	0.88	98.8372
	Phvul.003G121000.2	-	504	PK_Tyr_Ser-Thr	PF07714.22	258	1.3e-45	156.8	0	1	1	8.9e-47	1.8e-45	156.3	0	4	258	185	453	182	453	0.85	98.8372
	Phvul.010G129000.1	-	464	PK_Tyr_Ser-Thr	PF07714.22	258	1.3e-45	156.7	0	1	1	1.7e-46	3.5e-45	155.4	0	4	258	85	359	82	359	0.91	98.8372
	Phvul.002G023400.1	-	681	PK_Tyr_Ser-Thr	PF07714.22	258	1.5e-45	156.6	0	1	1	1.3e-46	2.7e-45	155.7	0	4	258	317	586	314	586	0.93	98.8372
	Phvul.009G239800.1	-	463	PK_Tyr_Ser-Thr	PF07714.22	258	2.9e-45	155.6	0	1	1	2e-46	4.2e-45	155.1	0	4	258	134	401	131	401	0.92	98.8372
	Phvul.002G070900.1	-	695	PK_Tyr_Ser-Thr	PF07714.22	258	3.2e-45	155.5	0	1	1	2.3e-46	4.8e-45	154.9	0	4	258	349	619	346	619	0.93	98.8372
	Phvul.006G006700.5	-	404	PK_Tyr_Ser-Thr	PF07714.22	258	4.4e-45	155	0	1	1	6.2e-46	1.3e-44	153.5	0	3	257	106	375	104	376	0.93	98.8372
	Phvul.006G006700.6	-	404	PK_Tyr_Ser-Thr	PF07714.22	258	4.4e-45	155	0	1	1	6.2e-46	1.3e-44	153.5	0	3	257	106	375	104	376	0.93	98.8372
	Phvul.006G006700.3	-	405	PK_Tyr_Ser-Thr	PF07714.22	258	4.4e-45	155	0	1	1	6.3e-46	1.3e-44	153.5	0	3	257	107	376	105	377	0.93	98.8372
	Phvul.006G006700.4	-	405	PK_Tyr_Ser-Thr	PF07714.22	258	4.4e-45	155	0	1	1	6.3e-46	1.3e-44	153.5	0	3	257	107	376	105	377	0.85	98.8372
	Phvul.009G219300.1	-	501	PK_Tyr_Ser-Thr	PF07714.22	258	4.8e-45	154.9	0	1	1	4.3e-46	8.8e-45	154	0	4	258	185	453	182	453	0.87	98.8372
	Phvul.001G233000.1	-	752	PK_Tyr_Ser-Thr	PF07714.22	258	5.3e-45	154.7	0	1	1	6.7e-46	1.4e-44	153.4	0	4	258	445	709	442	709	0.93	98.8372
	Phvul.002G247100.1	-	379	PK_Tyr_Ser-Thr	PF07714.22	258	6.2e-45	154.5	0	1	1	5.3e-46	1.1e-44	153.7	0	4	258	74	349	71	349	0.92	98.8372
	Phvul.006G057900.1	-	646	PK_Tyr_Ser-Thr	PF07714.22	258	7.9e-45	154.2	0	1	1	5.1e-46	1e-44	153.8	0	3	257	326	595	324	596	0.91	98.8372
	Phvul.004G012600.1	-	668	PK_Tyr_Ser-Thr	PF07714.22	258	8.7e-45	154	0	1	1	6.3e-46	1.3e-44	153.5	0	2	256	17	273	16	275	0.87	98.8372
	Phvul.003G191400.1	-	409	PK_Tyr_Ser-Thr	PF07714.22	258	9e-45	154	0	1	1	7.3e-46	1.5e-44	153.3	0	3	257	85	362	83	363	0.87	98.8372
	Phvul.005G158900.1	-	464	PK_Tyr_Ser-Thr	PF07714.22	258	1.3e-44	153.5	0	1	1	8.9e-46	1.8e-44	153	0	2	256	23	286	22	288	0.85	98.8372
	Phvul.006G187700.1	-	372	PK_Tyr_Ser-Thr	PF07714.22	258	1.5e-44	153.3	0	1	1	9.5e-46	2e-44	152.9	0	3	257	58	326	56	327	0.85	98.8372
	Phvul.006G187700.2	-	372	PK_Tyr_Ser-Thr	PF07714.22	258	1.5e-44	153.3	0	1	1	9.5e-46	2e-44	152.9	0	3	257	58	326	56	327	0.92	98.8372
	Phvul.006G006700.1	-	618	PK_Tyr_Ser-Thr	PF07714.22	258	1.5e-44	153.3	0	1	1	1.9e-45	4e-44	151.9	0	3	257	320	589	318	590	0.86	98.8372
	Phvul.004G155000.1	-	556	PK_Tyr_Ser-Thr	PF07714.22	258	1.7e-44	153.1	0	1	1	1.2e-45	2.5e-44	152.5	0	3	257	258	528	257	529	0.83	98.8372
	Phvul.002G080400.1	-	620	PK_Tyr_Ser-Thr	PF07714.22	258	2.2e-44	152.7	0	1	1	1.8e-45	3.7e-44	152	0	4	258	335	608	332	608	0.93	98.8372
	Phvul.007G086800.1	-	624	PK_Tyr_Ser-Thr	PF07714.22	258	2.3e-44	152.7	0	1	1	1.5e-45	3.1e-44	152.2	0	4	258	304	575	301	575	0.9	98.8372
	Phvul.006G000033.2	-	705	PK_Tyr_Ser-Thr	PF07714.22	258	2.5e-44	152.5	0	1	1	2.3e-45	4.7e-44	151.6	0	2	256	19	275	18	276	0.9	98.8372
	Phvul.006G000033.1	-	725	PK_Tyr_Ser-Thr	PF07714.22	258	2.7e-44	152.4	0	1	1	2.4e-45	5e-44	151.5	0	2	256	19	275	18	276	0.84	98.8372
	Phvul.007G252500.1	-	621	PK_Tyr_Ser-Thr	PF07714.22	258	3.7e-44	152	0	1	1	2.5e-45	5.1e-44	151.5	0	3	257	317	589	315	590	0.92	98.8372
	Phvul.009G092900.1	-	814	PK_Tyr_Ser-Thr	PF07714.22	258	5.2e-44	151.5	0	1	1	3.9e-45	8e-44	150.9	0	4	258	493	760	491	760	0.92	98.8372
	Phvul.006G208100.1	-	616	PK_Tyr_Ser-Thr	PF07714.22	258	5.3e-44	151.5	0	1	1	3.7e-45	7.6e-44	151	0	4	258	295	566	292	566	0.91	98.8372
	Phvul.006G076200.1	-	462	PK_Tyr_Ser-Thr	PF07714.22	258	5.4e-44	151.5	0	1	1	3.4e-45	7e-44	151.1	0	2	256	13	262	12	264	0.89	98.8372
	Phvul.005G094300.1	-	397	PK_Tyr_Ser-Thr	PF07714.22	258	5.6e-44	151.4	0	1	1	4.1e-45	8.5e-44	150.8	0	4	258	93	366	90	366	0.9	98.8372
	Phvul.004G155300.1	-	520	PK_Tyr_Ser-Thr	PF07714.22	258	6.6e-44	151.2	0	1	1	5.6e-45	1.2e-43	150.4	0	3	257	222	492	221	493	0.93	98.8372
	Phvul.007G064500.1	-	359	PK_Tyr_Ser-Thr	PF07714.22	258	7.3e-44	151	0	1	1	5.1e-45	1.1e-43	150.5	0	2	256	47	315	46	317	0.88	98.8372
	Phvul.008G245600.3	-	877	PK_Tyr_Ser-Thr	PF07714.22	258	1e-43	150.6	0	1	1	6.7e-45	1.4e-43	150.1	0	4	258	550	816	547	816	0.88	98.8372
	Phvul.008G245600.1	-	944	PK_Tyr_Ser-Thr	PF07714.22	258	1.2e-43	150.4	0	1	1	7.7e-45	1.6e-43	149.9	0	4	258	617	883	614	883	0.88	98.8372
	Phvul.008G245600.2	-	944	PK_Tyr_Ser-Thr	PF07714.22	258	1.2e-43	150.4	0	1	1	7.7e-45	1.6e-43	149.9	0	4	258	617	883	614	883	0.87	98.8372
	Phvul.003G249300.1	-	695	PK_Tyr_Ser-Thr	PF07714.22	258	1.4e-43	150.1	0	1	1	1.3e-44	2.7e-43	149.1	0	4	258	334	603	331	603	0.92	98.8372
	Phvul.004G086300.2	-	467	PK_Tyr_Ser-Thr	PF07714.22	258	2.1e-43	149.5	0	1	1	1.3e-44	2.8e-43	149.1	0	4	258	147	418	144	418	0.83	98.8372
	Phvul.001G234200.1	-	664	PK_Tyr_Ser-Thr	PF07714.22	258	2.1e-43	149.5	0	1	1	2.2e-44	4.5e-43	148.4	0	4	258	353	620	350	620	0.9	98.8372
	Phvul.003G148600.1	-	469	PK_Tyr_Ser-Thr	PF07714.22	258	2.6e-43	149.2	0	1	1	2.1e-44	4.3e-43	148.5	0	2	256	11	258	10	259	0.91	98.8372
	Phvul.010G015800.1	-	686	PK_Tyr_Ser-Thr	PF07714.22	258	3e-43	149	0	1	1	1.9e-44	4e-43	148.6	0	4	258	349	616	346	616	0.79	98.8372
	Phvul.010G088500.2	-	727	PK_Tyr_Ser-Thr	PF07714.22	258	3.1e-43	149	0	1	1	2.3e-43	4.7e-42	145.1	0	3	257	444	719	443	720	0.92	98.8372
	Phvul.009G043600.1	-	954	PK_Tyr_Ser-Thr	PF07714.22	258	3.1e-43	148.9	0	1	1	2.2e-44	4.6e-43	148.4	0	3	257	673	939	671	940	0.92	98.8372
	Phvul.009G043600.3	-	954	PK_Tyr_Ser-Thr	PF07714.22	258	3.1e-43	148.9	0	1	1	2.2e-44	4.6e-43	148.4	0	3	257	673	939	671	940	0.92	98.8372
	Phvul.009G043600.2	-	978	PK_Tyr_Ser-Thr	PF07714.22	258	3.3e-43	148.9	0	1	1	2.4e-44	4.8e-43	148.3	0	3	257	697	963	695	964	0.91	98.8372
	Phvul.009G112200.1	-	1018	PK_Tyr_Ser-Thr	PF07714.22	258	3.3e-43	148.9	0	1	1	2.2e-44	4.5e-43	148.4	0	4	258	702	974	699	974	0.85	98.8372
	Phvul.007G030100.1	-	572	PK_Tyr_Ser-Thr	PF07714.22	258	3.4e-43	148.8	0	1	1	2.6e-44	5.4e-43	148.2	0	3	257	270	541	269	542	0.89	98.8372
	Phvul.011G151900.1	-	800	PK_Tyr_Ser-Thr	PF07714.22	258	3.7e-43	148.7	0	1	1	3.7e-44	7.6e-43	147.7	0	4	258	480	744	477	744	0.91	98.8372
	Phvul.010G118300.1	-	436	PK_Tyr_Ser-Thr	PF07714.22	258	4e-43	148.6	0	1	1	2.8e-44	5.7e-43	148.1	0	2	256	16	264	15	265	0.79	98.8372
	Phvul.010G088500.1	-	799	PK_Tyr_Ser-Thr	PF07714.22	258	4.1e-43	148.6	0	1	1	2.8e-43	5.7e-42	144.8	0	3	257	516	791	515	792	0.94	98.8372
	Phvul.004G046800.1	-	626	PK_Tyr_Ser-Thr	PF07714.22	258	4.2e-43	148.5	0	1	1	2.6e-44	5.4e-43	148.2	0	4	258	308	574	305	574	0.92	98.8372
	Phvul.004G086300.1	-	624	PK_Tyr_Ser-Thr	PF07714.22	258	4.2e-43	148.5	0	1	1	2.8e-44	5.8e-43	148.1	0	4	258	304	575	301	575	0.92	98.8372
	Phvul.001G248700.1	-	443	PK_Tyr_Ser-Thr	PF07714.22	258	5.1e-43	148.3	0	1	1	3.7e-44	7.5e-43	147.7	0	2	256	13	262	12	263	0.92	98.8372
	Phvul.008G248900.1	-	443	PK_Tyr_Ser-Thr	PF07714.22	258	5.2e-43	148.2	0	1	1	3.4e-44	7e-43	147.8	0	2	256	13	262	12	263	0.88	98.8372
	Phvul.011G003200.1	-	974	PK_Tyr_Ser-Thr	PF07714.22	258	5.4e-43	148.2	0	1	1	3.8e-44	7.8e-43	147.6	0	4	258	683	951	680	951	0.88	98.8372
	Phvul.011G003200.2	-	974	PK_Tyr_Ser-Thr	PF07714.22	258	5.4e-43	148.2	0	1	1	3.8e-44	7.8e-43	147.6	0	4	258	683	951	680	951	0.88	98.8372
	Phvul.005G110300.3	-	473	PK_Tyr_Ser-Thr	PF07714.22	258	9.2e-43	147.4	0	1	1	9.6e-44	2e-42	146.3	0	3	257	184	455	182	456	0.94	98.8372
	Phvul.008G022700.1	-	623	PK_Tyr_Ser-Thr	PF07714.22	258	1.1e-42	147.1	0	1	1	7.2e-44	1.5e-42	146.7	0	4	258	306	572	303	572	0.94	98.8372
	Phvul.008G022700.2	-	623	PK_Tyr_Ser-Thr	PF07714.22	258	1.1e-42	147.1	0	1	1	7.2e-44	1.5e-42	146.7	0	4	258	306	572	303	572	0.86	98.8372
	Phvul.001G070000.1	-	616	PK_Tyr_Ser-Thr	PF07714.22	258	1.4e-42	146.9	0	1	1	1e-43	2.1e-42	146.2	0	3	257	309	575	308	576	0.88	98.8372
	Phvul.005G110300.2	-	553	PK_Tyr_Ser-Thr	PF07714.22	258	1.4e-42	146.8	0	1	1	1.4e-43	3e-42	145.7	0	3	257	264	535	262	536	0.85	98.8372
	Phvul.001G069600.1	-	603	PK_Tyr_Ser-Thr	PF07714.22	258	2e-42	146.3	0	1	1	1.6e-43	3.3e-42	145.6	0	3	257	296	562	295	563	0.9	98.8372
	Phvul.011G064000.2	-	410	PK_Tyr_Ser-Thr	PF07714.22	258	2.2e-42	146.1	0	1	1	1.7e-43	3.5e-42	145.5	0	4	258	82	361	79	361	0.76	98.8372
	Phvul.002G007800.1	-	974	PK_Tyr_Ser-Thr	PF07714.22	258	2.3e-42	146.1	0	1	1	2.4e-43	5e-42	145	0	2	256	680	966	679	968	0.86	98.8372
	Phvul.011G003100.1	-	802	PK_Tyr_Ser-Thr	PF07714.22	258	2.8e-42	145.8	0	1	1	1.9e-43	4e-42	145.3	0	4	258	489	770	486	770	0.93	98.8372
	Phvul.003G044400.3	-	584	PK_Tyr_Ser-Thr	PF07714.22	258	3e-42	145.7	0	1	1	1.9e-43	3.9e-42	145.4	0	4	258	267	533	264	533	0.88	98.8372
	Phvul.005G110300.1	-	741	PK_Tyr_Ser-Thr	PF07714.22	258	3e-42	145.7	0	1	1	2.8e-43	5.9e-42	144.8	0	3	257	452	723	450	724	0.89	98.8372
	Phvul.001G075500.1	-	617	PK_Tyr_Ser-Thr	PF07714.22	258	3.1e-42	145.7	0	1	1	2.3e-43	4.7e-42	145.1	0	3	257	310	576	309	577	0.85	98.8372
	Phvul.001G068500.1	-	612	PK_Tyr_Ser-Thr	PF07714.22	258	3.4e-42	145.6	0	1	1	2.7e-43	5.5e-42	144.9	0	3	257	305	571	304	572	0.93	98.8372
	Phvul.003G044400.1	-	621	PK_Tyr_Ser-Thr	PF07714.22	258	3.4e-42	145.5	0	1	1	2.2e-43	4.5e-42	145.1	0	4	258	304	570	301	570	0.93	98.8372
	Phvul.003G044400.2	-	621	PK_Tyr_Ser-Thr	PF07714.22	258	3.4e-42	145.5	0	1	1	2.2e-43	4.5e-42	145.1	0	4	258	304	570	301	570	0.82	98.8372
	Phvul.001G069232.1	-	668	PK_Tyr_Ser-Thr	PF07714.22	258	3.8e-42	145.4	0	1	1	3e-43	6.2e-42	144.7	0	3	257	361	627	360	628	0.86	98.8372
	Phvul.002G055600.1	-	803	PK_Tyr_Ser-Thr	PF07714.22	258	4.8e-42	145.1	0	1	1	5.9e-43	1.2e-41	143.7	0	3	257	515	783	513	784	0.88	98.8372
	Phvul.002G000200.1	-	806	PK_Tyr_Ser-Thr	PF07714.22	258	4.9e-42	145	0	1	1	5.3e-43	1.1e-41	143.9	0	3	257	517	785	515	786	0.85	98.8372
	Phvul.001G069264.1	-	573	PK_Tyr_Ser-Thr	PF07714.22	258	5.4e-42	144.9	0	1	1	4.3e-43	8.8e-42	144.2	0	3	257	266	532	265	533	0.91	98.8372
	Phvul.001G246800.2	-	851	PK_Tyr_Ser-Thr	PF07714.22	258	5.4e-42	144.9	0	1	1	3.8e-43	7.9e-42	144.3	0	4	258	567	832	564	832	0.93	98.8372
	Phvul.007G107300.1	-	282	PK_Tyr_Ser-Thr	PF07714.22	258	6.7e-42	144.6	0	1	1	3.9e-43	8.1e-42	144.3	0	2	256	22	268	21	269	0.89	98.8372
	Phvul.010G070400.1	-	982	PK_Tyr_Ser-Thr	PF07714.22	258	7.4e-42	144.4	0	1	1	5.9e-43	1.2e-41	143.7	0	2	256	698	966	697	968	0.93	98.8372
	Phvul.001G146900.1	-	640	PK_Tyr_Ser-Thr	PF07714.22	258	8.9e-42	144.2	0	1	1	5.8e-43	1.2e-41	143.8	0	4	258	298	569	295	569	0.91	98.8372
	Phvul.002G064400.1	-	623	PK_Tyr_Ser-Thr	PF07714.22	258	9.1e-42	144.1	0	1	1	6.3e-43	1.3e-41	143.6	0	4	258	305	575	302	575	0.88	98.8372
	Phvul.010G082400.1	-	786	PK_Tyr_Ser-Thr	PF07714.22	258	1.3e-41	143.6	0	1	1	8.5e-43	1.7e-41	143.2	0	4	258	500	763	497	763	0.92	98.8372
	Phvul.010G048600.1	-	276	PK_Tyr_Ser-Thr	PF07714.22	258	1.5e-41	143.4	0	1	1	8.8e-43	1.8e-41	143.2	0	2	256	15	261	14	262	0.9	98.8372
	Phvul.010G064300.1	-	851	PK_Tyr_Ser-Thr	PF07714.22	258	2.4e-41	142.8	0	1	1	1.5e-42	3.2e-41	142.4	0	4	258	565	830	562	830	0.89	98.8372
	Phvul.006G189800.1	-	717	PK_Tyr_Ser-Thr	PF07714.22	258	2.9e-41	142.5	0	1	1	2.2e-42	4.5e-41	141.9	0	4	258	442	713	439	713	0.91	98.8372
	Phvul.008G184400.1	-	446	PK_Tyr_Ser-Thr	PF07714.22	258	3.3e-41	142.3	0	1	1	2.6e-42	5.3e-41	141.6	0	2	256	10	258	9	259	0.91	98.8372
	Phvul.008G184400.2	-	446	PK_Tyr_Ser-Thr	PF07714.22	258	3.3e-41	142.3	0	1	1	2.6e-42	5.3e-41	141.6	0	2	256	10	258	9	259	0.9	98.8372
	Phvul.002G224200.3	-	630	PK_Tyr_Ser-Thr	PF07714.22	258	5.4e-41	141.6	0	1	1	3.7e-42	7.6e-41	141.1	0	4	258	355	626	352	626	0.91	98.8372
	Phvul.003G152900.1	-	634	PK_Tyr_Ser-Thr	PF07714.22	258	5.4e-41	141.6	0	1	1	3.7e-42	7.6e-41	141.1	0	4	258	293	559	290	559	0.88	98.8372
	Phvul.006G185000.1	-	692	PK_Tyr_Ser-Thr	PF07714.22	258	5.5e-41	141.6	0	1	1	3.4e-42	7e-41	141.2	0	4	258	356	621	353	621	0.92	98.8372
	Phvul.010G067600.1	-	467	PK_Tyr_Ser-Thr	PF07714.22	258	5.6e-41	141.6	0	1	1	3.7e-42	7.6e-41	141.1	0	2	256	13	262	12	263	0.89	98.8372
	Phvul.004G032000.1	-	515	PK_Tyr_Ser-Thr	PF07714.22	258	6.5e-41	141.4	0	1	1	4.5e-42	9.3e-41	140.8	0	2	256	21	268	20	269	0.9	98.8372
	Phvul.002G224200.1	-	700	PK_Tyr_Ser-Thr	PF07714.22	258	6.9e-41	141.3	0	1	1	4.7e-42	9.6e-41	140.8	0	4	258	425	696	422	696	0.9	98.8372
	Phvul.002G224200.2	-	700	PK_Tyr_Ser-Thr	PF07714.22	258	6.9e-41	141.3	0	1	1	4.7e-42	9.6e-41	140.8	0	4	258	425	696	422	696	0.89	98.8372
	Phvul.004G032000.2	-	528	PK_Tyr_Ser-Thr	PF07714.22	258	6.9e-41	141.3	0	1	1	4.8e-42	9.9e-41	140.8	0	2	256	34	281	33	282	0.91	98.8372
	Phvul.008G220100.1	-	834	PK_Tyr_Ser-Thr	PF07714.22	258	7.6e-41	141.1	0	1	1	4.8e-42	9.8e-41	140.8	0	4	258	547	812	544	812	0.8	98.8372
	Phvul.007G244300.1	-	658	PK_Tyr_Ser-Thr	PF07714.22	258	9.7e-41	140.8	0	1	1	1.4e-40	2.8e-39	136	0	4	258	33	311	30	311	0.87	98.8372
	Phvul.005G100400.1	-	999	PK_Tyr_Ser-Thr	PF07714.22	258	1.1e-40	140.6	0	1	1	7.5e-42	1.6e-40	140.1	0	4	258	694	966	691	966	0.92	98.8372
	Phvul.007G077300.1	-	864	PK_Tyr_Ser-Thr	PF07714.22	258	1.6e-40	140.1	0	1	1	1.1e-41	2.3e-40	139.5	0	3	257	534	803	532	804	0.9	98.8372
	Phvul.008G027300.1	-	341	PK_Tyr_Ser-Thr	PF07714.22	258	2.1e-40	139.7	0	1	1	1.4e-41	2.9e-40	139.2	0	4	258	42	302	39	302	0.91	98.8372
	Phvul.009G213000.1	-	457	PK_Tyr_Ser-Thr	PF07714.22	258	2.1e-40	139.7	0	1	1	1.4e-41	2.8e-40	139.3	0	2	256	21	271	20	272	0.92	98.8372
	Phvul.002G257000.1	-	610	PK_Tyr_Ser-Thr	PF07714.22	258	2.6e-40	139.4	0	1	1	1.7e-41	3.5e-40	139	0	4	258	290	561	287	561	0.92	98.8372
	Phvul.002G257000.2	-	610	PK_Tyr_Ser-Thr	PF07714.22	258	2.6e-40	139.4	0	1	1	1.7e-41	3.5e-40	139	0	4	258	290	561	287	561	0.85	98.8372
	Phvul.001G243800.1	-	806	PK_Tyr_Ser-Thr	PF07714.22	258	2.8e-40	139.3	0	1	1	2e-41	4.2e-40	138.7	0	3	257	499	781	497	782	0.88	98.8372
	Phvul.005G181900.2	-	328	PK_Tyr_Ser-Thr	PF07714.22	258	3.1e-40	139.1	0	1	1	1.9e-41	3.8e-40	138.8	0	2	256	24	273	23	274	0.88	98.8372
	Phvul.004G037500.2	-	543	PK_Tyr_Ser-Thr	PF07714.22	258	3.6e-40	138.9	0	1	1	2.8e-41	5.7e-40	138.3	0	4	258	267	535	264	535	0.88	98.8372
	Phvul.005G181900.1	-	458	PK_Tyr_Ser-Thr	PF07714.22	258	7.2e-40	137.9	0	1	1	5e-41	1e-39	137.4	0	2	256	24	273	23	274	0.89	98.8372
	Phvul.001G252800.3	-	581	PK_Tyr_Ser-Thr	PF07714.22	258	7.3e-40	137.9	0	1	1	5.8e-41	1.2e-39	137.2	0	4	258	261	532	258	532	0.89	98.8372
	Phvul.001G252800.2	-	582	PK_Tyr_Ser-Thr	PF07714.22	258	7.3e-40	137.9	0	1	1	5.8e-41	1.2e-39	137.2	0	4	258	262	533	259	533	0.89	98.8372
	Phvul.001G252800.4	-	603	PK_Tyr_Ser-Thr	PF07714.22	258	8.1e-40	137.8	0	1	1	6.3e-41	1.3e-39	137.1	0	4	258	283	554	280	554	0.89	98.8372
	Phvul.001G252800.1	-	604	PK_Tyr_Ser-Thr	PF07714.22	258	8.1e-40	137.8	0	1	1	6.4e-41	1.3e-39	137.1	0	4	258	284	555	281	555	0.92	98.8372
	Phvul.009G220200.3	-	385	PK_Tyr_Ser-Thr	PF07714.22	258	1.1e-39	137.4	0	1	1	6.6e-41	1.4e-39	137	0	2	256	20	270	19	271	0.92	98.8372
	Phvul.009G220200.6	-	385	PK_Tyr_Ser-Thr	PF07714.22	258	1.1e-39	137.4	0	1	1	6.6e-41	1.4e-39	137	0	2	256	20	270	19	271	0.88	98.8372
	Phvul.005G103200.1	-	691	PK_Tyr_Ser-Thr	PF07714.22	258	1.3e-39	137.1	0	1	1	8.5e-41	1.7e-39	136.7	0	4	258	352	617	349	617	0.92	98.8372
	Phvul.009G220200.2	-	428	PK_Tyr_Ser-Thr	PF07714.22	258	1.4e-39	137	0	1	1	9e-41	1.9e-39	136.6	0	2	256	20	270	19	271	0.92	98.8372
	Phvul.008G084600.1	-	461	PK_Tyr_Ser-Thr	PF07714.22	258	1.5e-39	136.9	0	1	1	1.1e-40	2.2e-39	136.3	0	2	256	13	262	12	263	0.92	98.8372
	Phvul.009G220200.1	-	458	PK_Tyr_Ser-Thr	PF07714.22	258	1.7e-39	136.7	0	1	1	1.1e-40	2.2e-39	136.3	0	2	256	20	270	19	271	0.9	98.8372
	Phvul.003G121600.1	-	421	PK_Tyr_Ser-Thr	PF07714.22	258	2.6e-39	136.1	0	1	1	1.8e-40	3.7e-39	135.6	0	2	256	7	257	6	258	0.89	98.8372
	Phvul.011G098200.1	-	1034	PK_Tyr_Ser-Thr	PF07714.22	258	2.9e-39	135.9	0	1	1	2.3e-40	4.7e-39	135.3	0	2	256	9	258	8	259	0.9	98.8372
	Phvul.009G145400.1	-	446	PK_Tyr_Ser-Thr	PF07714.22	258	3.3e-39	135.8	0	1	1	2.5e-40	5.2e-39	135.1	0	2	256	10	258	9	259	0.9	98.8372
	Phvul.009G145400.2	-	444	PK_Tyr_Ser-Thr	PF07714.22	258	3.4e-39	135.7	0	1	1	2.5e-40	5.1e-39	135.1	0	2	256	10	258	9	259	0.9	98.8372
	Phvul.010G160900.1	-	443	PK_Tyr_Ser-Thr	PF07714.22	258	3.6e-39	135.6	0	1	1	2.8e-40	5.7e-39	135	0	2	256	21	270	20	271	0.87	98.8372
	Phvul.004G037600.3	-	959	PK_Tyr_Ser-Thr	PF07714.22	258	4.1e-39	135.4	0	1	1	3e-40	6.1e-39	134.9	0	4	258	683	951	680	951	0.87	98.8372
	Phvul.004G037600.2	-	1016	PK_Tyr_Ser-Thr	PF07714.22	258	4.6e-39	135.3	0	1	1	3.3e-40	6.8e-39	134.7	0	4	258	740	1008	737	1008	0.88	98.8372
	Phvul.005G120700.2	-	1010	PK_Tyr_Ser-Thr	PF07714.22	258	5.1e-39	135.2	0	1	1	3.9e-40	8e-39	134.5	0	2	256	9	258	8	259	0.88	98.8372
	Phvul.005G120700.1	-	1039	PK_Tyr_Ser-Thr	PF07714.22	258	5.3e-39	135.1	0	1	1	4.1e-40	8.4e-39	134.4	0	2	256	9	258	8	259	0.86	98.8372
	Phvul.011G064000.1	-	422	PK_Tyr_Ser-Thr	PF07714.22	258	5.7e-39	135	0	1	1	5.5e-40	1.1e-38	134	0	4	258	82	373	79	373	0.89	98.8372
	Phvul.010G163000.1	-	363	PK_Tyr_Ser-Thr	PF07714.22	258	7e-39	134.7	0	1	1	4.4e-40	9e-39	134.3	0	2	256	81	331	80	332	0.81	98.8372
	Phvul.008G124900.1	-	781	PK_Tyr_Ser-Thr	PF07714.22	258	3.2e-38	132.5	0	1	1	1.5e-38	3e-37	129.3	0	3	257	510	779	509	780	0.91	98.8372
	Phvul.002G238800.1	-	512	PK_Tyr_Ser-Thr	PF07714.22	258	6.2e-38	131.6	0	1	1	4.2e-39	8.7e-38	131.1	0	2	256	22	271	21	272	0.85	98.8372
	Phvul.003G203100.1	-	1114	PK_Tyr_Ser-Thr	PF07714.22	258	1.2e-37	130.6	0	1	1	8.5e-39	1.8e-37	130.1	0	2	256	775	1047	774	1049	0.81	98.8372
	Phvul.002G232600.1	-	999	PK_Tyr_Ser-Thr	PF07714.22	258	2.3e-37	129.7	0	1	1	1.6e-38	3.3e-37	129.2	0	4	258	689	966	686	966	0.9	98.8372
	Phvul.006G174800.1	-	507	PK_Tyr_Ser-Thr	PF07714.22	258	7.3e-37	128.1	0	1	1	4.9e-38	1e-36	127.6	0	2	256	33	282	32	283	0.85	98.8372
	Phvul.008G028500.1	-	347	PK_Tyr_Ser-Thr	PF07714.22	258	8.2e-37	127.9	0	1	1	5.1e-38	1e-36	127.6	0	3	257	49	307	47	308	0.92	98.8372
	Phvul.009G206900.1	-	438	PK_Tyr_Ser-Thr	PF07714.22	258	1e-36	127.6	0	1	1	7e-38	1.4e-36	127.1	0	2	256	22	271	21	272	0.87	98.8372
	Phvul.009G038000.1	-	523	PK_Tyr_Ser-Thr	PF07714.22	258	2.1e-36	126.6	0	1	1	1.6e-37	3.3e-36	125.9	0	4	258	48	325	45	325	0.81	98.8372
	Phvul.002G146300.1	-	435	PK_Tyr_Ser-Thr	PF07714.22	258	2.8e-36	126.2	0	1	1	2.1e-37	4.4e-36	125.5	0	4	258	124	388	121	388	0.9	98.8372
	Phvul.003G156900.1	-	433	PK_Tyr_Ser-Thr	PF07714.22	258	3.7e-36	125.8	0	1	1	2.7e-37	5.5e-36	125.2	0	2	256	24	273	23	274	0.9	98.8372
	Phvul.008G085000.2	-	385	PK_Tyr_Ser-Thr	PF07714.22	258	4.4e-36	125.5	0	1	1	2.6e-37	5.4e-36	125.2	0	2	256	31	281	30	283	0.84	98.8372
	Phvul.006G059284.1	-	1090	PK_Tyr_Ser-Thr	PF07714.22	258	1.4e-33	117.4	0	1	1	9.2e-35	1.9e-33	116.9	0	3	257	767	1039	765	1040	0.84	98.8372
	Phvul.007G258000.2	-	568	PK_Tyr_Ser-Thr	PF07714.22	258	2.1e-33	116.7	0	1	1	2.5e-34	5.1e-33	115.5	0	4	258	249	522	246	522	0.84	98.8372
	Phvul.007G258000.1	-	735	PK_Tyr_Ser-Thr	PF07714.22	258	3.9e-33	115.9	0	1	1	4.4e-34	9.1e-33	114.7	0	4	258	416	689	413	689	0.87	98.8372
	Phvul.006G216400.1	-	351	PK_Tyr_Ser-Thr	PF07714.22	258	5.9e-32	112	0	1	1	3.7e-33	7.6e-32	111.6	0	2	256	5	256	4	257	0.78	98.8372
	Phvul.001G243500.2	-	489	PK_Tyr_Ser-Thr	PF07714.22	258	3.8e-31	109.3	0	1	1	7.8e-32	1.6e-30	107.3	0	2	256	200	461	199	463	0.89	98.8372
	Phvul.008G266600.1	-	525	PK_Tyr_Ser-Thr	PF07714.22	258	6.8e-30	105.2	0	1	1	4.9e-31	1e-29	104.7	0	2	256	79	332	78	333	0.81	98.8372
	Phvul.001G134600.3	-	858	PK_Tyr_Ser-Thr	PF07714.22	258	2.8e-26	93.4	0	1	1	3.9e-27	8e-26	91.9	0	4	258	580	852	577	852	0.81	98.8372
	Phvul.001G134600.1	-	887	PK_Tyr_Ser-Thr	PF07714.22	258	3e-26	93.3	0	1	1	4.2e-27	8.6e-26	91.8	0	4	258	609	881	606	881	0.81	98.8372
	Phvul.001G134600.2	-	887	PK_Tyr_Ser-Thr	PF07714.22	258	3e-26	93.3	0	1	1	4.2e-27	8.6e-26	91.8	0	4	258	609	881	606	881	0.83	98.8372
	Phvul.009G230800.1	-	456	PK_Tyr_Ser-Thr	PF07714.22	258	4.5e-15	56.7	0	1	1	2.8e-16	5.7e-15	56.3	0	2	256	10	271	9	273	0.83	98.4496
	Phvul.004G154600.1	-	627	PK_Tyr_Ser-Thr	PF07714.22	258	8.4e-83	278.6	0.6	1	2	2e-35	4.1e-34	119.1	0.1	4	257	43	312	40	313	0.76	98.4496
	Phvul.008G139200.1	-	841	PK_Tyr_Ser-Thr	PF07714.22	258	2.8e-70	237.6	0	1	2	1.2e-37	2.4e-36	126.4	0	4	257	120	413	117	414	0.92	98.4496
	Phvul.003G199900.2	-	355	PK_Tyr_Ser-Thr	PF07714.22	258	4.7e-64	217.2	0	1	1	2.7e-65	5.6e-64	216.9	0	4	257	60	310	57	311	0.91	98.4496
	Phvul.007G134500.1	-	1168	PK_Tyr_Ser-Thr	PF07714.22	258	4.1e-63	214.1	0	1	1	3e-64	6.1e-63	213.5	0	3	256	890	1149	888	1151	0.95	98.4496
	Phvul.007G184600.1	-	967	PK_Tyr_Ser-Thr	PF07714.22	258	3.1e-61	208	0	1	1	2e-62	4.1e-61	207.5	0	3	256	688	936	686	938	0.9	98.4496
	Phvul.004G004800.1	-	352	PK_Tyr_Ser-Thr	PF07714.22	258	2e-58	198.8	0	1	1	1.1e-59	2.4e-58	198.5	0	5	258	30	286	26	286	0.89	98.4496
	Phvul.002G043600.1	-	387	PK_Tyr_Ser-Thr	PF07714.22	258	2.1e-58	198.7	0	1	1	2.9e-58	5.9e-57	193.9	0	5	258	84	358	80	358	0.89	98.4496
	Phvul.002G043600.2	-	387	PK_Tyr_Ser-Thr	PF07714.22	258	2.1e-58	198.7	0	1	1	2.9e-58	5.9e-57	193.9	0	5	258	84	358	80	358	0.91	98.4496
	Phvul.001G096600.1	-	352	PK_Tyr_Ser-Thr	PF07714.22	258	6.3e-57	193.8	0	1	1	3.6e-58	7.4e-57	193.6	0	5	258	30	286	26	286	0.9	98.4496
	Phvul.009G174100.1	-	352	PK_Tyr_Ser-Thr	PF07714.22	258	5.8e-56	190.7	0	1	1	3.3e-57	6.8e-56	190.4	0	5	258	30	286	26	286	0.91	98.4496
	Phvul.008G025200.1	-	421	PK_Tyr_Ser-Thr	PF07714.22	258	5.8e-53	180.8	0	1	1	3.8e-54	7.7e-53	180.4	0	3	256	117	372	115	374	0.92	98.4496
	Phvul.004G043800.1	-	425	PK_Tyr_Ser-Thr	PF07714.22	258	6.4e-52	177.4	0	1	1	4.1e-53	8.4e-52	177	0	3	256	119	374	117	376	0.91	98.4496
	Phvul.008G263900.1	-	464	PK_Tyr_Ser-Thr	PF07714.22	258	2.5e-51	175.5	0	1	1	1.8e-52	3.8e-51	174.9	0	4	257	139	407	136	408	0.92	98.4496
	Phvul.011G030800.2	-	1378	PK_Tyr_Ser-Thr	PF07714.22	258	5.1e-51	174.5	0	1	1	4.2e-52	8.7e-51	173.7	0	3	256	22	270	20	271	0.88	98.4496
	Phvul.007G260400.2	-	450	PK_Tyr_Ser-Thr	PF07714.22	258	1.1e-50	173.4	0	1	1	7.4e-52	1.5e-50	172.9	0	4	257	125	404	122	405	0.91	98.4496
	Phvul.004G043800.4	-	423	PK_Tyr_Ser-Thr	PF07714.22	258	1.3e-50	173.2	0	1	1	8.1e-52	1.7e-50	172.8	0	3	256	119	372	117	374	0.87	98.4496
	Phvul.002G242600.2	-	912	PK_Tyr_Ser-Thr	PF07714.22	258	2e-50	172.5	0	1	1	2.4e-51	4.9e-50	171.3	0	5	258	602	868	598	868	0.87	98.4496
	Phvul.007G260300.1	-	670	PK_Tyr_Ser-Thr	PF07714.22	258	2.2e-50	172.4	0	1	1	1.5e-51	3.1e-50	171.9	0	4	257	343	622	340	623	0.87	98.4496
	Phvul.002G242600.1	-	985	PK_Tyr_Ser-Thr	PF07714.22	258	2.4e-50	172.3	0	1	1	2.7e-51	5.6e-50	171.1	0	5	258	675	941	671	941	0.9	98.4496
	Phvul.006G084800.1	-	640	PK_Tyr_Ser-Thr	PF07714.22	258	3.3e-50	171.8	0	1	1	2.2e-51	4.6e-50	171.3	0	3	256	322	590	320	592	0.95	98.4496
	Phvul.003G041000.3	-	729	PK_Tyr_Ser-Thr	PF07714.22	258	4e-50	171.5	0	1	1	2.8e-51	5.8e-50	171	0	3	256	254	502	252	504	0.95	98.4496
	Phvul.003G041000.4	-	729	PK_Tyr_Ser-Thr	PF07714.22	258	4e-50	171.5	0	1	1	2.8e-51	5.8e-50	171	0	3	256	254	502	252	504	0.92	98.4496
	Phvul.006G084900.3	-	669	PK_Tyr_Ser-Thr	PF07714.22	258	4e-50	171.5	0	1	1	2.8e-51	5.7e-50	171	0	3	256	351	619	349	621	0.95	98.4496
	Phvul.003G041000.1	-	834	PK_Tyr_Ser-Thr	PF07714.22	258	5.1e-50	171.2	0	1	1	3.7e-51	7.6e-50	170.6	0	3	256	254	502	252	504	0.95	98.4496
	Phvul.003G041000.2	-	833	PK_Tyr_Ser-Thr	PF07714.22	258	5.1e-50	171.2	0	1	1	3.7e-51	7.6e-50	170.6	0	3	256	254	502	252	504	0.87	98.4496
	Phvul.003G090000.1	-	956	PK_Tyr_Ser-Thr	PF07714.22	258	1e-49	170.2	0	1	1	2e-50	4.2e-49	168.2	0	4	257	635	901	632	902	0.94	98.4496
	Phvul.003G168000.2	-	410	PK_Tyr_Ser-Thr	PF07714.22	258	1.9e-49	169.3	0	1	1	1.4e-50	2.8e-49	168.8	0	5	258	82	357	78	357	0.94	98.4496
	Phvul.003G168000.1	-	434	PK_Tyr_Ser-Thr	PF07714.22	258	2.3e-49	169.1	0	1	1	1.6e-50	3.3e-49	168.5	0	5	258	106	381	102	381	0.93	98.4496
	Phvul.008G056800.1	-	672	PK_Tyr_Ser-Thr	PF07714.22	258	2.7e-49	168.8	0	1	1	1.9e-50	3.9e-49	168.3	0	4	257	361	627	358	628	0.82	98.4496
	Phvul.007G051000.1	-	656	PK_Tyr_Ser-Thr	PF07714.22	258	2.9e-49	168.7	0	1	1	5.3e-50	1.1e-48	166.8	0	4	257	339	606	336	607	0.93	98.4496
	Phvul.008G058800.1	-	644	PK_Tyr_Ser-Thr	PF07714.22	258	3.3e-49	168.5	0	1	1	2.2e-50	4.5e-49	168.1	0	4	257	356	621	353	622	0.91	98.4496
	Phvul.006G084500.1	-	638	PK_Tyr_Ser-Thr	PF07714.22	258	3.6e-49	168.4	0	1	1	2.5e-50	5.2e-49	167.9	0	3	256	324	592	322	594	0.87	98.4496
	Phvul.006G084700.1	-	681	PK_Tyr_Ser-Thr	PF07714.22	258	6.6e-49	167.5	0	1	1	6.1e-50	1.3e-48	166.6	0	3	256	368	635	366	637	0.85	98.4496
	Phvul.006G133200.1	-	944	PK_Tyr_Ser-Thr	PF07714.22	258	1.5e-48	166.4	0	1	1	1.4e-49	2.8e-48	165.5	0	4	257	621	886	618	887	0.9	98.4496
	Phvul.003G226700.1	-	378	PK_Tyr_Ser-Thr	PF07714.22	258	1.6e-48	166.3	0	1	1	1.1e-49	2.2e-48	165.8	0	5	258	70	347	66	347	0.93	98.4496
	Phvul.006G020700.1	-	396	PK_Tyr_Ser-Thr	PF07714.22	258	1.9e-48	166.1	0	1	1	1.4e-49	3e-48	165.4	0	4	257	75	352	72	353	0.83	98.4496
	Phvul.002G049500.1	-	680	PK_Tyr_Ser-Thr	PF07714.22	258	2.1e-48	165.9	0	1	1	2.1e-49	4.3e-48	164.9	0	3	256	357	624	355	626	0.91	98.4496
	Phvul.008G233400.1	-	400	PK_Tyr_Ser-Thr	PF07714.22	258	2.3e-48	165.8	0	1	1	1.5e-49	3.1e-48	165.4	0	5	258	75	353	71	353	0.9	98.4496
	Phvul.009G150500.1	-	612	PK_Tyr_Ser-Thr	PF07714.22	258	5.1e-48	164.6	0	1	1	3.2e-49	6.7e-48	164.3	0	3	256	215	465	213	466	0.9	98.4496
	Phvul.001G000900.1	-	351	PK_Tyr_Ser-Thr	PF07714.22	258	6.3e-48	164.3	0	1	1	5.4e-49	1.1e-47	163.5	0	4	257	49	316	46	317	0.95	98.4496
	Phvul.007G210500.1	-	361	PK_Tyr_Ser-Thr	PF07714.22	258	6.7e-48	164.3	0	1	1	3.9e-49	8e-48	164	0	5	258	73	345	69	345	0.84	98.4496
	Phvul.005G078100.10	-	850	PK_Tyr_Ser-Thr	PF07714.22	258	7.4e-48	164.1	0	1	1	5.8e-49	1.2e-47	163.4	0	3	256	505	772	503	774	0.84	98.4496
	Phvul.005G078100.9	-	873	PK_Tyr_Ser-Thr	PF07714.22	258	7.6e-48	164.1	0	1	1	6.1e-49	1.2e-47	163.4	0	3	256	528	795	526	797	0.84	98.4496
	Phvul.005G078100.7	-	902	PK_Tyr_Ser-Thr	PF07714.22	258	8.3e-48	163.9	0	1	1	6.5e-49	1.3e-47	163.3	0	3	256	557	824	555	826	0.84	98.4496
	Phvul.005G078100.6	-	925	PK_Tyr_Ser-Thr	PF07714.22	258	8.5e-48	163.9	0	1	1	6.8e-49	1.4e-47	163.2	0	3	256	580	847	578	849	0.91	98.4496
	Phvul.011G045600.1	-	461	PK_Tyr_Ser-Thr	PF07714.22	258	8.6e-48	163.9	0	1	1	5.5e-49	1.1e-47	163.5	0	5	258	147	414	143	414	0.84	98.4496
	Phvul.005G078100.5	-	927	PK_Tyr_Ser-Thr	PF07714.22	258	8.8e-48	163.9	0	1	1	6.8e-49	1.4e-47	163.2	0	3	256	582	849	580	851	0.84	98.4496
	Phvul.005G078100.4	-	950	PK_Tyr_Ser-Thr	PF07714.22	258	9e-48	163.8	0	1	1	7.1e-49	1.5e-47	163.1	0	3	256	605	872	603	874	0.86	98.4496
	Phvul.011G200400.1	-	714	PK_Tyr_Ser-Thr	PF07714.22	258	9.1e-48	163.8	0	1	1	6.5e-49	1.3e-47	163.3	0	5	258	391	657	388	657	0.84	98.4496
	Phvul.005G078100.3	-	979	PK_Tyr_Ser-Thr	PF07714.22	258	9.8e-48	163.7	0	1	1	7.5e-49	1.5e-47	163.1	0	3	256	634	901	632	903	0.84	98.4496
	Phvul.005G078100.2	-	1002	PK_Tyr_Ser-Thr	PF07714.22	258	9.9e-48	163.7	0	1	1	7.8e-49	1.6e-47	163	0	3	256	657	924	655	926	0.91	98.4496
	Phvul.008G127100.1	-	840	PK_Tyr_Ser-Thr	PF07714.22	258	1.4e-47	163.2	0	1	1	9.6e-49	2e-47	162.7	0	4	257	525	792	522	793	0.91	98.4496
	Phvul.L005743.1	-	422	PK_Tyr_Ser-Thr	PF07714.22	258	1.7e-47	162.9	0	1	1	1.4e-48	2.9e-47	162.2	0	5	258	78	356	74	356	0.88	98.4496
	Phvul.002G324600.1	-	918	PK_Tyr_Ser-Thr	PF07714.22	258	1.9e-47	162.8	0	1	1	1.8e-48	3.7e-47	161.8	0	4	257	575	848	572	849	0.86	98.4496
	Phvul.011G197500.1	-	712	PK_Tyr_Ser-Thr	PF07714.22	258	2.2e-47	162.5	0	1	1	1.5e-48	3.1e-47	162.1	0	5	258	382	648	379	648	0.82	98.4496
	Phvul.011G152200.1	-	823	PK_Tyr_Ser-Thr	PF07714.22	258	3.9e-47	161.8	0	1	1	3.7e-48	7.5e-47	160.8	0	3	256	509	776	507	778	0.9	98.4496
	Phvul.001G232300.2	-	347	PK_Tyr_Ser-Thr	PF07714.22	258	5.3e-47	161.3	0	1	1	3.7e-48	7.6e-47	160.8	0	5	258	36	314	32	314	0.91	98.4496
	Phvul.010G010300.1	-	413	PK_Tyr_Ser-Thr	PF07714.22	258	6.1e-47	161.1	0	1	1	4.4e-48	9e-47	160.5	0	5	258	77	355	73	355	0.94	98.4496
	Phvul.007G138200.1	-	757	PK_Tyr_Ser-Thr	PF07714.22	258	7e-47	160.9	0	1	1	4.8e-48	9.9e-47	160.4	0	5	258	423	693	420	693	0.86	98.4496
	Phvul.011G198500.3	-	519	PK_Tyr_Ser-Thr	PF07714.22	258	7.5e-47	160.8	0	1	1	4.9e-48	1e-46	160.4	0	5	258	196	462	193	462	0.89	98.4496
	Phvul.006G146400.1	-	623	PK_Tyr_Ser-Thr	PF07714.22	258	7.7e-47	160.8	0	1	1	1.2e-47	2.5e-46	159.1	0	4	257	328	594	325	595	0.9	98.4496
	Phvul.001G232300.1	-	390	PK_Tyr_Ser-Thr	PF07714.22	258	7.8e-47	160.8	0	1	1	5.4e-48	1.1e-46	160.2	0	5	258	79	357	75	357	0.91	98.4496
	Phvul.001G233100.1	-	745	PK_Tyr_Ser-Thr	PF07714.22	258	8.3e-47	160.7	0	1	1	6.4e-48	1.3e-46	160	0	4	257	441	705	438	706	0.91	98.4496
	Phvul.005G159200.4	-	661	PK_Tyr_Ser-Thr	PF07714.22	258	9.3e-47	160.5	0	1	1	6.8e-48	1.4e-46	159.9	0	5	258	379	648	375	648	0.88	98.4496
	Phvul.002G002600.1	-	375	PK_Tyr_Ser-Thr	PF07714.22	258	9.5e-47	160.5	0	1	1	6.9e-48	1.4e-46	159.9	0	5	258	73	348	69	348	0.91	98.4496
	Phvul.005G159200.3	-	725	PK_Tyr_Ser-Thr	PF07714.22	258	1.1e-46	160.2	0	1	1	8.3e-48	1.7e-46	159.6	0	5	258	443	712	439	712	0.91	98.4496
	Phvul.005G159200.1	-	745	PK_Tyr_Ser-Thr	PF07714.22	258	1.2e-46	160.1	0	1	1	8.8e-48	1.8e-46	159.6	0	5	258	463	732	459	732	0.91	98.4496
	Phvul.005G159200.2	-	745	PK_Tyr_Ser-Thr	PF07714.22	258	1.2e-46	160.1	0	1	1	8.8e-48	1.8e-46	159.6	0	5	258	463	732	459	732	0.86	98.4496
	Phvul.011G198500.2	-	638	PK_Tyr_Ser-Thr	PF07714.22	258	1.2e-46	160.1	0	1	1	8.1e-48	1.7e-46	159.7	0	5	258	315	581	312	581	0.9	98.4496
	Phvul.009G227001.1	-	461	PK_Tyr_Ser-Thr	PF07714.22	258	1.3e-46	160	0	1	1	1.1e-47	2.2e-46	159.3	0	5	258	83	356	79	356	0.86	98.4496
	Phvul.011G197700.2	-	697	PK_Tyr_Ser-Thr	PF07714.22	258	1.4e-46	159.9	0	1	1	9.2e-48	1.9e-46	159.5	0	5	258	374	640	371	640	0.86	98.4496
	Phvul.011G197700.1	-	705	PK_Tyr_Ser-Thr	PF07714.22	258	1.4e-46	159.9	0	1	1	9.5e-48	2e-46	159.4	0	5	258	382	648	379	648	0.89	98.4496
	Phvul.004G026000.1	-	488	PK_Tyr_Ser-Thr	PF07714.22	258	1.5e-46	159.8	0	1	1	3.7e-47	7.5e-46	157.5	0	5	258	139	415	135	415	0.86	98.4496
	Phvul.002G073500.1	-	361	PK_Tyr_Ser-Thr	PF07714.22	258	1.5e-46	159.8	0	1	1	2.6e-47	5.4e-46	158	0	5	258	67	340	63	340	0.86	98.4496
	Phvul.011G198500.1	-	710	PK_Tyr_Ser-Thr	PF07714.22	258	1.5e-46	159.8	0	1	1	1e-47	2.1e-46	159.3	0	5	258	387	653	384	653	0.88	98.4496
	Phvul.011G152000.1	-	819	PK_Tyr_Ser-Thr	PF07714.22	258	1.7e-46	159.6	0	1	1	1.4e-47	2.9e-46	158.9	0	2	255	503	770	502	773	0.89	98.4496
	Phvul.002G059500.1	-	619	PK_Tyr_Ser-Thr	PF07714.22	258	2e-46	159.4	0	1	1	2.5e-47	5.1e-46	158.1	0	4	257	319	590	316	591	0.87	98.4496
	Phvul.002G227300.1	-	367	PK_Tyr_Ser-Thr	PF07714.22	258	2.7e-46	159	0	1	1	1.9e-47	3.9e-46	158.5	0	4	257	50	316	47	317	0.87	98.4496
	Phvul.002G227300.2	-	367	PK_Tyr_Ser-Thr	PF07714.22	258	2.7e-46	159	0	1	1	1.9e-47	3.9e-46	158.5	0	4	257	50	316	47	317	0.88	98.4496
	Phvul.008G205600.2	-	389	PK_Tyr_Ser-Thr	PF07714.22	258	2.9e-46	158.9	0	1	1	4.9e-47	1e-45	157.1	0	3	256	72	349	70	351	0.88	98.4496
	Phvul.008G205600.3	-	389	PK_Tyr_Ser-Thr	PF07714.22	258	2.9e-46	158.9	0	1	1	4.9e-47	1e-45	157.1	0	3	256	72	349	70	351	0.87	98.4496
	Phvul.006G133400.1	-	953	PK_Tyr_Ser-Thr	PF07714.22	258	2.9e-46	158.9	0	1	1	3.8e-47	7.9e-46	157.5	0	4	257	639	904	636	905	0.87	98.4496
	Phvul.006G133400.2	-	992	PK_Tyr_Ser-Thr	PF07714.22	258	3.2e-46	158.8	0	1	1	4.1e-47	8.5e-46	157.4	0	4	257	678	943	675	944	0.82	98.4496
	Phvul.003G015800.1	-	929	PK_Tyr_Ser-Thr	PF07714.22	258	3.2e-46	158.7	0	1	1	2.1e-46	4.4e-45	155	0	4	257	578	850	575	851	0.9	98.4496
	Phvul.010G103100.1	-	490	PK_Tyr_Ser-Thr	PF07714.22	258	3.3e-46	158.7	0	1	1	2e-47	4.2e-46	158.4	0	4	257	158	425	155	426	0.89	98.4496
	Phvul.006G137100.1	-	365	PK_Tyr_Ser-Thr	PF07714.22	258	4.1e-46	158.4	0	1	1	2.6e-47	5.4e-46	158	0	3	256	41	305	39	307	0.93	98.4496
	Phvul.001G040100.1	-	636	PK_Tyr_Ser-Thr	PF07714.22	258	4.1e-46	158.4	0	1	1	2.8e-47	5.7e-46	157.9	0	4	257	342	606	339	607	0.91	98.4496
	Phvul.003G067900.1	-	393	PK_Tyr_Ser-Thr	PF07714.22	258	4.7e-46	158.2	0	1	1	4.1e-47	8.4e-46	157.4	0	5	258	83	359	79	359	0.96	98.4496
	Phvul.007G261200.1	-	374	PK_Tyr_Ser-Thr	PF07714.22	258	5.2e-46	158.1	0	1	1	3e-47	6.1e-46	157.8	0	5	258	76	350	72	350	0.87	98.4496
	Phvul.008G080000.2	-	659	PK_Tyr_Ser-Thr	PF07714.22	258	6e-46	157.9	0	1	1	3.9e-47	7.9e-46	157.5	0	5	258	333	596	329	596	0.91	98.4496
	Phvul.008G043900.4	-	474	PK_Tyr_Ser-Thr	PF07714.22	258	6.8e-46	157.7	0	1	1	1.1e-46	2.3e-45	155.9	0	5	258	126	402	122	402	0.91	98.4496
	Phvul.008G043900.3	-	475	PK_Tyr_Ser-Thr	PF07714.22	258	6.8e-46	157.7	0	1	1	1.1e-46	2.3e-45	155.9	0	5	258	127	403	123	403	0.89	98.4496
	Phvul.006G137500.1	-	714	PK_Tyr_Ser-Thr	PF07714.22	258	9.3e-46	157.2	0.1	1	1	1e-46	2.1e-45	156.1	0.1	3	256	390	654	388	656	0.86	98.4496
	Phvul.001G076100.1	-	699	PK_Tyr_Ser-Thr	PF07714.22	258	9.5e-46	157.2	0	1	1	6.6e-47	1.4e-45	156.7	0	5	258	390	656	387	656	0.91	98.4496
	Phvul.009G190400.3	-	553	PK_Tyr_Ser-Thr	PF07714.22	258	1.1e-45	157	0	1	1	7e-47	1.4e-45	156.6	0	4	257	269	533	266	534	0.91	98.4496
	Phvul.009G190400.2	-	554	PK_Tyr_Ser-Thr	PF07714.22	258	1.1e-45	157	0	1	1	7.1e-47	1.5e-45	156.6	0	4	257	270	534	267	535	0.84	98.4496
	Phvul.003G204500.1	-	670	PK_Tyr_Ser-Thr	PF07714.22	258	1.2e-45	156.8	0	1	1	1.4e-46	2.9e-45	155.6	0	4	257	368	633	365	634	0.91	98.4496
	Phvul.009G190400.4	-	604	PK_Tyr_Ser-Thr	PF07714.22	258	1.4e-45	156.7	0	1	1	8.7e-47	1.8e-45	156.3	0	4	257	320	584	317	585	0.91	98.4496
	Phvul.009G190400.1	-	605	PK_Tyr_Ser-Thr	PF07714.22	258	1.4e-45	156.7	0	1	1	8.7e-47	1.8e-45	156.3	0	4	257	321	585	318	586	0.9	98.4496
	Phvul.008G120600.1	-	410	PK_Tyr_Ser-Thr	PF07714.22	258	1.9e-45	156.2	0	1	1	1.5e-46	3.1e-45	155.5	0	5	258	77	355	73	355	0.89	98.4496
	Phvul.003G027600.2	-	547	PK_Tyr_Ser-Thr	PF07714.22	258	2e-45	156.1	0	1	1	1.5e-46	3e-45	155.6	0	4	257	202	466	200	467	0.83	98.4496
	Phvul.008G126800.1	-	863	PK_Tyr_Ser-Thr	PF07714.22	258	2.1e-45	156.1	0	1	1	1.9e-46	3.9e-45	155.2	0	2	255	546	813	545	816	0.88	98.4496
	Phvul.009G083300.1	-	383	PK_Tyr_Ser-Thr	PF07714.22	258	2.1e-45	156.1	0	1	1	1.8e-46	3.7e-45	155.2	0	4	257	84	358	81	359	0.89	98.4496
	Phvul.003G027600.1	-	671	PK_Tyr_Ser-Thr	PF07714.22	258	3.2e-45	155.5	0	1	1	2.4e-46	4.9e-45	154.9	0	4	257	326	590	324	591	0.82	98.4496
	Phvul.008G105300.1	-	379	PK_Tyr_Ser-Thr	PF07714.22	258	3.4e-45	155.4	0	1	1	2.9e-46	6e-45	154.6	0	4	257	47	313	44	314	0.82	98.4496
	Phvul.008G105300.2	-	379	PK_Tyr_Ser-Thr	PF07714.22	258	3.4e-45	155.4	0	1	1	2.9e-46	6e-45	154.6	0	4	257	47	313	44	314	0.91	98.4496
	Phvul.001G236600.1	-	634	PK_Tyr_Ser-Thr	PF07714.22	258	3.7e-45	155.3	0	1	1	2.7e-46	5.6e-45	154.7	0	4	257	349	620	346	621	0.94	98.4496
	Phvul.010G060800.1	-	662	PK_Tyr_Ser-Thr	PF07714.22	258	4.1e-45	155.1	0	1	1	2.8e-46	5.8e-45	154.6	0	4	257	350	612	347	613	0.89	98.4496
	Phvul.008G043900.2	-	475	PK_Tyr_Ser-Thr	PF07714.22	258	4.9e-45	154.9	0	1	1	8e-46	1.7e-44	153.1	0	5	258	126	403	122	403	0.89	98.4496
	Phvul.008G043900.1	-	476	PK_Tyr_Ser-Thr	PF07714.22	258	4.9e-45	154.9	0	1	1	8.1e-46	1.7e-44	153.1	0	5	258	127	404	123	404	0.83	98.4496
	Phvul.003G158600.1	-	777	PK_Tyr_Ser-Thr	PF07714.22	258	5.5e-45	154.7	0	1	1	4.4e-46	9.1e-45	154	0	3	256	459	726	457	728	0.9	98.4496
	Phvul.001G040400.1	-	636	PK_Tyr_Ser-Thr	PF07714.22	258	6.1e-45	154.6	0	1	1	5.1e-46	1e-44	153.8	0	4	257	342	606	339	607	0.89	98.4496
	Phvul.005G164100.1	-	882	PK_Tyr_Ser-Thr	PF07714.22	258	6.2e-45	154.5	0	1	1	5e-46	1e-44	153.8	0	3	256	579	844	577	846	0.81	98.4496
	Phvul.011G152700.1	-	777	PK_Tyr_Ser-Thr	PF07714.22	258	6.6e-45	154.4	0	1	1	4.8e-46	9.8e-45	153.9	0	2	255	464	730	463	733	0.86	98.4496
	Phvul.003G202000.1	-	656	PK_Tyr_Ser-Thr	PF07714.22	258	7.9e-45	154.2	0	1	1	5.7e-46	1.2e-44	153.6	0	5	258	307	571	303	571	0.87	98.4496
	Phvul.005G164000.1	-	879	PK_Tyr_Ser-Thr	PF07714.22	258	9.8e-45	153.9	0	1	1	8.3e-46	1.7e-44	153.1	0	3	256	573	838	571	840	0.85	98.4496
	Phvul.007G234400.1	-	643	PK_Tyr_Ser-Thr	PF07714.22	258	1.6e-44	153.2	0	1	1	1e-45	2.1e-44	152.8	0	3	256	329	588	327	590	0.89	98.4496
	Phvul.005G163000.1	-	881	PK_Tyr_Ser-Thr	PF07714.22	258	2.5e-44	152.5	0	1	1	3.3e-45	6.8e-44	151.1	0	3	256	575	840	573	842	0.89	98.4496
	Phvul.009G023900.1	-	444	PK_Tyr_Ser-Thr	PF07714.22	258	6.1e-44	151.3	0	1	1	4.2e-45	8.6e-44	150.8	0	5	258	131	398	127	398	0.88	98.4496
	Phvul.008G244600.1	-	439	PK_Tyr_Ser-Thr	PF07714.22	258	6.8e-44	151.1	0	1	1	4.2e-45	8.7e-44	150.8	0	5	258	132	397	128	397	0.89	98.4496
	Phvul.003G030000.2	-	652	PK_Tyr_Ser-Thr	PF07714.22	258	7.2e-44	151	0	1	1	7.6e-45	1.6e-43	149.9	0	4	257	335	603	332	604	0.86	98.4496
	Phvul.005G103300.1	-	688	PK_Tyr_Ser-Thr	PF07714.22	258	7.4e-44	151	0.1	1	1	5.2e-45	1.1e-43	150.5	0.1	5	258	350	615	346	615	0.85	98.4496
	Phvul.007G030000.1	-	620	PK_Tyr_Ser-Thr	PF07714.22	258	8.9e-44	150.7	0	1	1	7e-45	1.4e-43	150.1	0	3	256	306	577	305	579	0.86	98.4496
	Phvul.005G162300.1	-	847	PK_Tyr_Ser-Thr	PF07714.22	258	9.9e-44	150.6	0	1	1	1.1e-44	2.2e-43	149.4	0	4	257	543	808	541	809	0.88	98.4496
	Phvul.003G024000.1	-	736	PK_Tyr_Ser-Thr	PF07714.22	258	1e-43	150.5	0	1	1	6.7e-45	1.4e-43	150.1	0	4	257	412	681	409	682	0.91	98.4496
	Phvul.005G163800.11	-	852	PK_Tyr_Ser-Thr	PF07714.22	258	2.7e-43	149.2	0	1	1	3.2e-44	6.5e-43	147.9	0	3	256	545	810	543	812	0.91	98.4496
	Phvul.005G163800.12	-	852	PK_Tyr_Ser-Thr	PF07714.22	258	2.7e-43	149.2	0	1	1	3.2e-44	6.5e-43	147.9	0	3	256	545	810	543	812	0.91	98.4496
	Phvul.005G163800.13	-	852	PK_Tyr_Ser-Thr	PF07714.22	258	2.7e-43	149.2	0	1	1	3.2e-44	6.5e-43	147.9	0	3	256	545	810	543	812	0.91	98.4496
	Phvul.005G163800.10	-	853	PK_Tyr_Ser-Thr	PF07714.22	258	2.7e-43	149.2	0	1	1	3.2e-44	6.5e-43	147.9	0	3	256	545	810	543	812	0.91	98.4496
	Phvul.005G163800.8	-	853	PK_Tyr_Ser-Thr	PF07714.22	258	2.7e-43	149.2	0	1	1	3.2e-44	6.5e-43	147.9	0	3	256	545	810	543	812	0.91	98.4496
	Phvul.005G163800.9	-	853	PK_Tyr_Ser-Thr	PF07714.22	258	2.7e-43	149.2	0	1	1	3.2e-44	6.5e-43	147.9	0	3	256	545	810	543	812	0.91	98.4496
	Phvul.005G163800.5	-	876	PK_Tyr_Ser-Thr	PF07714.22	258	2.9e-43	149.1	0	1	1	3.3e-44	6.9e-43	147.8	0	3	256	569	834	567	836	0.91	98.4496
	Phvul.005G163800.6	-	876	PK_Tyr_Ser-Thr	PF07714.22	258	2.9e-43	149.1	0	1	1	3.3e-44	6.9e-43	147.8	0	3	256	569	834	567	836	0.91	98.4496
	Phvul.005G163800.7	-	876	PK_Tyr_Ser-Thr	PF07714.22	258	2.9e-43	149.1	0	1	1	3.3e-44	6.9e-43	147.8	0	3	256	569	834	567	836	0.91	98.4496
	Phvul.005G163800.2	-	877	PK_Tyr_Ser-Thr	PF07714.22	258	2.9e-43	149.1	0	1	1	3.3e-44	6.9e-43	147.8	0	3	256	569	834	567	836	0.91	98.4496
	Phvul.005G163800.3	-	877	PK_Tyr_Ser-Thr	PF07714.22	258	2.9e-43	149.1	0	1	1	3.3e-44	6.9e-43	147.8	0	3	256	569	834	567	836	0.91	98.4496
	Phvul.005G163800.4	-	877	PK_Tyr_Ser-Thr	PF07714.22	258	2.9e-43	149.1	0	1	1	3.3e-44	6.9e-43	147.8	0	3	256	569	834	567	836	0.85	98.4496
	Phvul.002G184800.1	-	1132	PK_Tyr_Ser-Thr	PF07714.22	258	3.1e-43	149	0	1	1	2.2e-44	4.6e-43	148.4	0	4	257	838	1116	835	1117	0.85	98.4496
	Phvul.005G054300.1	-	1124	PK_Tyr_Ser-Thr	PF07714.22	258	4e-43	148.6	0	1	1	3e-44	6.2e-43	148	0	4	257	818	1088	815	1089	0.83	98.4496
	Phvul.L002151.1	-	1033	PK_Tyr_Ser-Thr	PF07714.22	258	4.5e-43	148.4	0	1	1	3.1e-44	6.3e-43	147.9	0	4	257	726	996	723	997	0.83	98.4496
	Phvul.010G057100.1	-	799	PK_Tyr_Ser-Thr	PF07714.22	258	5.8e-43	148.1	0	1	1	1.9e-43	3.8e-42	145.4	0	3	256	515	790	514	792	0.93	98.4496
	Phvul.003G193100.1	-	602	PK_Tyr_Ser-Thr	PF07714.22	258	6e-43	148	0	1	1	3.8e-44	7.9e-43	147.6	0	4	257	316	582	313	583	0.86	98.4496
	Phvul.005G163500.1	-	880	PK_Tyr_Ser-Thr	PF07714.22	258	6.3e-43	148	0	1	1	7.1e-44	1.5e-42	146.7	0	4	257	574	839	572	840	0.95	98.4496
	Phvul.003G149200.1	-	379	PK_Tyr_Ser-Thr	PF07714.22	258	6.9e-43	147.8	0	1	1	4.8e-44	1e-42	147.3	0	4	257	45	312	42	313	0.85	98.4496
	Phvul.008G028200.1	-	344	PK_Tyr_Ser-Thr	PF07714.22	258	7.2e-43	147.8	0	1	1	5.6e-44	1.2e-42	147.1	0	4	257	42	298	39	299	0.93	98.4496
	Phvul.011G054300.1	-	919	PK_Tyr_Ser-Thr	PF07714.22	258	7.8e-43	147.6	0	1	1	6.3e-44	1.3e-42	146.9	0	4	257	524	793	521	794	0.84	98.4496
	Phvul.008G174300.1	-	609	PK_Tyr_Ser-Thr	PF07714.22	258	8.2e-43	147.6	0	1	1	5.8e-44	1.2e-42	147	0	3	256	306	571	305	573	0.89	98.4496
	Phvul.004G175800.1	-	1016	PK_Tyr_Ser-Thr	PF07714.22	258	1e-42	147.3	0	1	1	7.3e-44	1.5e-42	146.7	0	4	257	699	977	696	978	0.88	98.4496
	Phvul.005G162600.1	-	880	PK_Tyr_Ser-Thr	PF07714.22	258	1.1e-42	147.1	0	1	1	1.4e-43	2.8e-42	145.8	0	3	256	574	839	572	841	0.83	98.4496
	Phvul.005G178500.1	-	366	PK_Tyr_Ser-Thr	PF07714.22	258	1.2e-42	147	0	1	1	1.9e-43	3.9e-42	145.3	0	3	256	42	309	40	311	0.88	98.4496
	Phvul.006G174400.2	-	572	PK_Tyr_Ser-Thr	PF07714.22	258	1.3e-42	147	0	1	1	9e-44	1.9e-42	146.4	0	4	257	252	520	249	521	0.9	98.4496
	Phvul.001G045400.1	-	667	PK_Tyr_Ser-Thr	PF07714.22	258	1.5e-42	146.7	0	1	1	9.7e-44	2e-42	146.3	0	4	257	354	617	351	618	0.88	98.4496
	Phvul.006G174400.1	-	620	PK_Tyr_Ser-Thr	PF07714.22	258	1.5e-42	146.7	0	1	1	1.1e-43	2.3e-42	146.1	0	4	257	300	568	297	569	0.86	98.4496
	Phvul.007G084400.1	-	1081	PK_Tyr_Ser-Thr	PF07714.22	258	2.4e-42	146.1	0	1	1	2e-43	4e-42	145.3	0	4	257	787	1055	784	1056	0.9	98.4496
	Phvul.004G175900.1	-	1005	PK_Tyr_Ser-Thr	PF07714.22	258	3.1e-42	145.7	0	1	1	2.2e-43	4.5e-42	145.2	0	4	257	686	963	683	964	0.85	98.4496
	Phvul.001G083100.1	-	377	PK_Tyr_Ser-Thr	PF07714.22	258	4e-42	145.3	0	1	1	2.9e-43	6e-42	144.7	0	4	257	79	344	76	345	0.86	98.4496
	Phvul.009G184500.2	-	1112	PK_Tyr_Ser-Thr	PF07714.22	258	4.2e-42	145.3	0	1	1	4.8e-43	9.8e-42	144	0	4	257	826	1095	823	1096	0.9	98.4496
	Phvul.004G175700.1	-	1011	PK_Tyr_Ser-Thr	PF07714.22	258	4.8e-42	145.1	0	1	1	3.6e-43	7.3e-42	144.5	0	4	257	699	971	696	972	0.87	98.4496
	Phvul.003G267000.1	-	434	PK_Tyr_Ser-Thr	PF07714.22	258	5.3e-42	144.9	0	1	1	2.3e-42	4.7e-41	141.8	0	5	258	75	346	71	346	0.9	98.4496
	Phvul.008G094500.1	-	673	PK_Tyr_Ser-Thr	PF07714.22	258	6.8e-42	144.6	0	1	1	4.4e-43	9.1e-42	144.1	0	4	257	352	615	349	616	0.88	98.4496
	Phvul.011G161000.1	-	1052	PK_Tyr_Ser-Thr	PF07714.22	258	9.3e-42	144.1	0	1	1	6.5e-43	1.3e-41	143.6	0	3	256	770	1037	768	1039	0.86	98.4496
	Phvul.011G182300.1	-	1057	PK_Tyr_Ser-Thr	PF07714.22	258	9.7e-42	144.1	0	1	1	6.8e-43	1.4e-41	143.5	0	4	257	787	1054	784	1055	0.88	98.4496
	Phvul.001G137000.8	-	582	PK_Tyr_Ser-Thr	PF07714.22	258	1e-41	144	0	1	1	7.1e-43	1.5e-41	143.5	0	3	256	18	266	16	267	0.83	98.4496
	Phvul.001G040600.1	-	607	PK_Tyr_Ser-Thr	PF07714.22	258	1e-41	144	0	1	1	6.5e-43	1.3e-41	143.6	0	4	257	338	592	335	593	0.91	98.4496
	Phvul.006G174900.1	-	436	PK_Tyr_Ser-Thr	PF07714.22	258	1.2e-41	143.8	0	1	1	7.9e-43	1.6e-41	143.3	0	3	256	12	260	10	261	0.88	98.4496
	Phvul.001G137000.7	-	627	PK_Tyr_Ser-Thr	PF07714.22	258	1.2e-41	143.8	0	1	1	8.4e-43	1.7e-41	143.2	0	3	256	6	254	4	255	0.88	98.4496
	Phvul.001G137000.1	-	639	PK_Tyr_Ser-Thr	PF07714.22	258	1.2e-41	143.7	0	1	1	8.8e-43	1.8e-41	143.2	0	3	256	18	266	16	267	0.88	98.4496
	Phvul.001G137000.4	-	639	PK_Tyr_Ser-Thr	PF07714.22	258	1.2e-41	143.7	0	1	1	8.8e-43	1.8e-41	143.2	0	3	256	18	266	16	267	0.88	98.4496
	Phvul.001G137000.5	-	639	PK_Tyr_Ser-Thr	PF07714.22	258	1.2e-41	143.7	0	1	1	8.8e-43	1.8e-41	143.2	0	3	256	18	266	16	267	0.88	98.4496
	Phvul.001G137000.6	-	639	PK_Tyr_Ser-Thr	PF07714.22	258	1.2e-41	143.7	0	1	1	8.8e-43	1.8e-41	143.2	0	3	256	18	266	16	267	0.88	98.4496
	Phvul.001G137000.2	-	664	PK_Tyr_Ser-Thr	PF07714.22	258	1.3e-41	143.6	0	1	1	9.5e-43	2e-41	143.1	0	3	256	43	291	41	292	0.88	98.4496
	Phvul.001G137000.3	-	664	PK_Tyr_Ser-Thr	PF07714.22	258	1.3e-41	143.6	0	1	1	9.5e-43	2e-41	143.1	0	3	256	43	291	41	292	0.92	98.4496
	Phvul.003G015900.1	-	792	PK_Tyr_Ser-Thr	PF07714.22	258	1.5e-41	143.4	0	1	1	1.1e-42	2.2e-41	142.9	0	4	257	477	770	475	771	0.82	98.4496
	Phvul.008G044600.1	-	721	PK_Tyr_Ser-Thr	PF07714.22	258	2.1e-41	143	0	1	1	1.3e-42	2.8e-41	142.6	0	4	257	437	695	434	696	0.91	98.4496
	Phvul.009G112600.1	-	295	PK_Tyr_Ser-Thr	PF07714.22	258	2.1e-41	143	0	1	1	1.2e-42	2.5e-41	142.7	0	3	256	34	279	32	280	0.82	98.4496
	Phvul.008G146600.1	-	949	PK_Tyr_Ser-Thr	PF07714.22	258	2.9e-41	142.5	0	1	1	2e-42	4.1e-41	142	0	5	258	668	932	664	932	0.85	98.4496
	Phvul.009G046600.1	-	796	PK_Tyr_Ser-Thr	PF07714.22	258	5.7e-41	141.5	0	1	1	2.9e-41	5.9e-40	138.2	0	4	257	481	785	478	786	0.84	98.4496
	Phvul.007G168000.1	-	410	PK_Tyr_Ser-Thr	PF07714.22	258	6.9e-41	141.3	0	1	1	4.8e-42	9.8e-41	140.8	0	3	256	117	378	115	380	0.87	98.4496
	Phvul.008G027100.1	-	346	PK_Tyr_Ser-Thr	PF07714.22	258	9.5e-41	140.8	0	1	1	6.5e-42	1.3e-40	140.3	0	4	257	42	304	39	305	0.84	98.4496
	Phvul.011G081200.1	-	612	PK_Tyr_Ser-Thr	PF07714.22	258	1.2e-40	140.4	0	1	1	1.7e-41	3.5e-40	139	0	5	258	231	506	227	506	0.87	98.4496
	Phvul.008G026900.1	-	357	PK_Tyr_Ser-Thr	PF07714.22	258	1.3e-40	140.4	0	1	1	8.8e-42	1.8e-40	139.9	0	4	257	42	305	39	306	0.87	98.4496
	Phvul.008G039400.1	-	515	PK_Tyr_Ser-Thr	PF07714.22	258	2e-40	139.7	0	1	1	1.4e-41	2.9e-40	139.2	0	2	255	20	266	19	268	0.87	98.4496
	Phvul.008G039400.2	-	515	PK_Tyr_Ser-Thr	PF07714.22	258	2e-40	139.7	0	1	1	1.4e-41	2.9e-40	139.2	0	2	255	20	266	19	268	0.91	98.4496
	Phvul.009G087500.1	-	446	PK_Tyr_Ser-Thr	PF07714.22	258	7.2e-40	137.9	0	1	1	5.1e-41	1.1e-39	137.4	0	2	255	12	260	11	262	0.78	98.4496
	Phvul.001G165100.1	-	1020	PK_Tyr_Ser-Thr	PF07714.22	258	1.7e-39	136.7	0	1	1	1.2e-40	2.5e-39	136.2	0	3	256	714	986	712	988	0.82	98.4496
	Phvul.007G153400.1	-	1019	PK_Tyr_Ser-Thr	PF07714.22	258	3.6e-39	135.6	0	1	1	2.5e-40	5.2e-39	135.1	0	4	257	711	983	708	984	0.91	98.4496
	Phvul.004G128100.1	-	684	PK_Tyr_Ser-Thr	PF07714.22	258	6.4e-39	134.8	0	1	1	4e-40	8.2e-39	134.5	0	5	258	416	677	412	677	0.91	98.4496
	Phvul.007G168100.1	-	626	PK_Tyr_Ser-Thr	PF07714.22	258	1.1e-38	134.1	0	1	1	9.6e-40	2e-38	133.2	0	4	257	286	556	283	557	0.9	98.4496
	Phvul.001G154300.2	-	604	PK_Tyr_Ser-Thr	PF07714.22	258	3e-38	132.6	0	1	1	2.3e-39	4.6e-38	132	0	3	256	6	254	4	255	0.9	98.4496
	Phvul.001G154300.3	-	604	PK_Tyr_Ser-Thr	PF07714.22	258	3e-38	132.6	0	1	1	2.3e-39	4.6e-38	132	0	3	256	6	254	4	255	0.9	98.4496
	Phvul.001G154300.1	-	643	PK_Tyr_Ser-Thr	PF07714.22	258	3.5e-38	132.4	0	1	1	2.6e-39	5.3e-38	131.8	0	3	256	45	293	43	294	0.89	98.4496
	Phvul.003G134100.1	-	356	PK_Tyr_Ser-Thr	PF07714.22	258	4.1e-38	132.2	0	1	1	2.6e-39	5.3e-38	131.8	0	3	256	72	328	70	329	0.82	98.4496
	Phvul.008G044400.1	-	731	PK_Tyr_Ser-Thr	PF07714.22	258	4.8e-38	131.9	0	1	1	3.2e-39	6.6e-38	131.5	0	4	257	442	700	439	701	0.88	98.4496
	Phvul.010G035800.1	-	609	PK_Tyr_Ser-Thr	PF07714.22	258	9.6e-38	131	0	1	1	7.4e-39	1.5e-37	130.3	0	4	257	303	573	300	574	0.88	98.4496
	Phvul.010G035800.2	-	609	PK_Tyr_Ser-Thr	PF07714.22	258	9.6e-38	131	0	1	1	7.4e-39	1.5e-37	130.3	0	4	257	303	573	300	574	0.89	98.4496
	Phvul.003G165700.1	-	452	PK_Tyr_Ser-Thr	PF07714.22	258	2e-37	129.9	0	1	1	1.3e-38	2.6e-37	129.5	0	3	256	19	266	17	267	0.9	98.4496
	Phvul.008G248800.1	-	427	PK_Tyr_Ser-Thr	PF07714.22	258	2e-37	129.9	0	1	1	1.2e-38	2.5e-37	129.6	0	3	256	20	268	18	270	0.92	98.4496
	Phvul.002G060200.1	-	683	PK_Tyr_Ser-Thr	PF07714.22	258	3.6e-37	129.1	0	1	1	2.3e-38	4.8e-37	128.7	0	5	258	415	676	411	676	0.81	98.4496
	Phvul.009G198800.1	-	450	PK_Tyr_Ser-Thr	PF07714.22	258	4e-37	128.9	0	1	1	2.1e-37	4.4e-36	125.5	0	4	257	106	386	104	387	0.87	98.4496
	Phvul.010G165200.2	-	625	PK_Tyr_Ser-Thr	PF07714.22	258	5e-37	128.6	0	1	1	4.6e-38	9.5e-37	127.7	0	5	258	346	609	343	609	0.87	98.4496
	Phvul.010G165200.1	-	689	PK_Tyr_Ser-Thr	PF07714.22	258	5.7e-37	128.4	0	1	1	5.8e-38	1.2e-36	127.4	0	5	258	410	673	407	673	0.81	98.4496
	Phvul.009G133000.1	-	606	PK_Tyr_Ser-Thr	PF07714.22	258	5.8e-37	128.4	0	1	1	5.6e-38	1.2e-36	127.4	0	4	257	320	585	317	586	0.77	98.4496
	Phvul.006G181800.2	-	1001	PK_Tyr_Ser-Thr	PF07714.22	258	6.3e-37	128.3	0	1	1	4.4e-38	9.2e-37	127.8	0	4	257	690	967	687	968	0.89	98.4496
	Phvul.003G165700.4	-	342	PK_Tyr_Ser-Thr	PF07714.22	258	9.6e-37	127.7	0	1	1	5.8e-38	1.2e-36	127.4	0	3	256	19	264	17	265	0.89	98.4496
	Phvul.003G165700.2	-	450	PK_Tyr_Ser-Thr	PF07714.22	258	2e-36	126.6	0	1	1	1.3e-37	2.7e-36	126.2	0	3	256	19	264	17	265	0.87	98.4496
	Phvul.002G196200.1	-	1164	PK_Tyr_Ser-Thr	PF07714.22	258	3.4e-36	125.9	0	1	1	2.8e-37	5.7e-36	125.1	0	4	257	870	1154	867	1155	0.9	98.4496
	Phvul.007G255900.1	-	961	PK_Tyr_Ser-Thr	PF07714.22	258	5.9e-36	125.1	0	1	1	5e-37	1e-35	124.3	0	3	256	12	260	10	261	0.84	98.4496
	Phvul.002G270000.1	-	642	PK_Tyr_Ser-Thr	PF07714.22	258	1.2e-35	124.1	0	1	1	7.9e-37	1.6e-35	123.7	0	1	254	33	284	33	287	0.9	98.4496
	Phvul.007G174200.1	-	610	PK_Tyr_Ser-Thr	PF07714.22	258	1.6e-35	123.7	0	1	1	1.1e-36	2.2e-35	123.2	0	3	256	6	254	4	255	0.9	98.4496
	Phvul.007G174200.2	-	610	PK_Tyr_Ser-Thr	PF07714.22	258	1.6e-35	123.7	0	1	1	1.1e-36	2.2e-35	123.2	0	3	256	6	254	4	255	0.9	98.4496
	Phvul.006G076600.1	-	437	PK_Tyr_Ser-Thr	PF07714.22	258	1.8e-35	123.5	0	1	1	1.1e-36	2.3e-35	123.2	0	2	255	19	267	18	269	0.81	98.4496
	Phvul.003G161500.1	-	445	PK_Tyr_Ser-Thr	PF07714.22	258	1.9e-35	123.4	0	1	1	3.4e-36	6.9e-35	121.6	0	4	257	106	385	104	386	0.83	98.4496
	Phvul.003G288300.1	-	479	PK_Tyr_Ser-Thr	PF07714.22	258	5.7e-35	121.9	0	1	1	4.6e-36	9.4e-35	121.2	0	4	257	168	431	165	432	0.88	98.4496
	Phvul.009G229800.1	-	356	PK_Tyr_Ser-Thr	PF07714.22	258	1.5e-34	120.5	0	1	1	9.5e-36	2e-34	120.1	0	3	256	72	328	70	329	0.9	98.4496
	Phvul.007G112100.1	-	676	PK_Tyr_Ser-Thr	PF07714.22	258	4e-34	119.1	0	1	1	2.6e-35	5.3e-34	118.7	0	5	258	408	669	404	669	0.82	98.4496
	Phvul.002G152100.1	-	884	PK_Tyr_Ser-Thr	PF07714.22	258	4.4e-34	119	0	1	1	4.8e-35	1e-33	117.8	0	4	257	599	873	596	874	0.92	98.4496
	Phvul.003G214800.1	-	681	PK_Tyr_Ser-Thr	PF07714.22	258	4.7e-34	118.9	0	1	1	3.1e-35	6.4e-34	118.4	0	5	258	412	673	408	673	0.86	98.4496
	Phvul.005G164200.1	-	849	PK_Tyr_Ser-Thr	PF07714.22	258	2.5e-32	113.2	0	1	1	3.8e-33	7.8e-32	111.6	0	3	256	558	811	556	813	0.86	98.4496
	Phvul.002G021600.1	-	359	PK_Tyr_Ser-Thr	PF07714.22	258	1.1e-31	111.1	0	1	1	7.3e-33	1.5e-31	110.7	0	3	256	23	273	21	274	0.86	98.4496
	Phvul.003G293600.1	-	416	PK_Tyr_Ser-Thr	PF07714.22	258	1.2e-31	111	0	1	1	7.4e-33	1.5e-31	110.6	0	3	256	83	333	81	334	0.86	98.4496
	Phvul.009G157800.1	-	351	PK_Tyr_Ser-Thr	PF07714.22	258	3e-31	109.7	0	1	1	1.9e-32	4e-31	109.3	0	3	256	6	256	4	257	0.86	98.4496
	Phvul.002G261200.1	-	341	PK_Tyr_Ser-Thr	PF07714.22	258	1.9e-30	107	0	1	1	1.2e-31	2.6e-30	106.6	0	2	255	5	255	4	257	0.85	98.4496
	Phvul.008G176300.1	-	339	PK_Tyr_Ser-Thr	PF07714.22	258	4.6e-30	105.8	0	1	1	2.8e-31	5.8e-30	105.5	0	3	256	6	256	4	257	0.9	98.4496
	Phvul.011G181900.1	-	353	PK_Tyr_Ser-Thr	PF07714.22	258	5.4e-30	105.6	0	1	1	6.1e-31	1.3e-29	104.4	0	5	258	72	348	69	348	0.85	98.4496
	Phvul.008G179300.1	-	415	PK_Tyr_Ser-Thr	PF07714.22	258	6.2e-30	105.4	0	1	1	7.6e-31	1.6e-29	104	0	5	258	54	311	50	311	0.84	98.4496
	Phvul.002G179600.4	-	390	PK_Tyr_Ser-Thr	PF07714.22	258	3.5e-29	102.9	0	1	1	2.2e-30	4.6e-29	102.5	0	2	255	25	283	24	285	0.88	98.4496
	Phvul.006G043700.2	-	549	PK_Tyr_Ser-Thr	PF07714.22	258	3.8e-29	102.8	0	1	1	3.3e-30	6.8e-29	102	0	2	255	97	349	96	351	0.84	98.4496
	Phvul.002G179600.1	-	448	PK_Tyr_Ser-Thr	PF07714.22	258	5.2e-29	102.3	0	1	1	3.3e-30	6.8e-29	102	0	2	255	25	283	24	285	0.86	98.4496
	Phvul.009G190566.1	-	550	PK_Tyr_Ser-Thr	PF07714.22	258	1.8e-28	100.5	0	1	1	2.3e-29	4.8e-28	99.2	0	3	256	70	322	68	323	0.86	98.4496
	Phvul.006G015300.1	-	544	PK_Tyr_Ser-Thr	PF07714.22	258	1.9e-28	100.5	0	1	1	1.7e-29	3.5e-28	99.6	0	2	255	89	341	88	343	0.86	98.4496
	Phvul.003G194100.1	-	537	PK_Tyr_Ser-Thr	PF07714.22	258	6.9e-28	98.7	0	1	1	4.9e-29	1e-27	98.1	0	3	256	57	309	55	310	0.85	98.4496
	Phvul.001G140900.2	-	410	PK_Tyr_Ser-Thr	PF07714.22	258	1.6e-27	97.5	0	1	1	1.3e-28	2.8e-27	96.7	0	5	258	121	390	117	390	0.87	98.4496
	Phvul.003G078400.1	-	546	PK_Tyr_Ser-Thr	PF07714.22	258	4.2e-27	96.1	0	1	1	3.4e-28	7.1e-27	95.4	0	3	256	93	345	91	346	0.84	98.4496
	Phvul.001G135300.1	-	538	PK_Tyr_Ser-Thr	PF07714.22	258	5.3e-27	95.8	0	1	1	3.9e-28	7.9e-27	95.2	0	2	255	60	312	59	314	0.79	98.4496
	Phvul.005G025000.1	-	1638	PK_Tyr_Ser-Thr	PF07714.22	258	1.4e-26	94.4	0	1	1	1.2e-27	2.5e-26	93.5	0	2	255	147	436	146	439	0.87	98.4496
	Phvul.008G122400.2	-	595	PK_Tyr_Ser-Thr	PF07714.22	258	4.2e-26	92.8	0	1	1	2.8e-27	5.8e-26	92.4	0	5	258	299	570	296	570	0.85	98.4496
	Phvul.011G055400.1	-	539	PK_Tyr_Ser-Thr	PF07714.22	258	5.5e-26	92.4	0	1	1	4.4e-27	9.1e-26	91.7	0	2	255	68	320	67	322	0.87	98.4496
	Phvul.008G122400.1	-	687	PK_Tyr_Ser-Thr	PF07714.22	258	5.8e-26	92.3	0	1	1	3.9e-27	8.1e-26	91.9	0	5	258	391	662	388	662	0.83	98.4496
	Phvul.001G197700.1	-	575	PK_Tyr_Ser-Thr	PF07714.22	258	2.9e-24	86.8	0	1	1	3.5e-25	7.2e-24	85.5	0	3	256	112	364	110	365	0.77	98.4496
	Phvul.007G107800.1	-	460	PK_Tyr_Ser-Thr	PF07714.22	258	2.2e-13	51.1	0	1	1	1.4e-14	2.9e-13	50.7	0	2	255	10	270	9	273	0.78	98.4496
	Phvul.007G191200.1	-	453	PK_Tyr_Ser-Thr	PF07714.22	258	1.3e-12	48.6	0	1	1	8e-14	1.6e-12	48.3	0	2	255	10	270	9	273	0.78	98.4496
	Phvul.007G191200.2	-	453	PK_Tyr_Ser-Thr	PF07714.22	258	1.3e-12	48.6	0	1	1	8e-14	1.6e-12	48.3	0	2	255	10	270	9	273	0.78	98.4496
	Phvul.007G191200.3	-	454	PK_Tyr_Ser-Thr	PF07714.22	258	1.3e-12	48.6	0	1	1	8e-14	1.7e-12	48.3	0	2	255	10	270	9	273	0.78	98.4496
	Phvul.007G191200.4	-	454	PK_Tyr_Ser-Thr	PF07714.22	258	1.3e-12	48.6	0	1	1	8e-14	1.7e-12	48.3	0	2	255	10	270	9	273	0.78	98.4496
	Phvul.001G162300.1	-	452	PK_Tyr_Ser-Thr	PF07714.22	258	1.8e-12	48.1	0	1	1	1.3e-13	2.7e-12	47.6	0	2	255	10	270	9	273	0.81	98.062
	Phvul.010G043600.1	-	857	PK_Tyr_Ser-Thr	PF07714.22	258	8.1e-68	229.5	0	2	2	1.3e-30	2.6e-29	103.3	0	5	257	542	818	538	819	0.88	98.062
	Phvul.006G184700.1	-	459	PK_Tyr_Ser-Thr	PF07714.22	258	9.8e-63	212.9	0	1	1	6.1e-64	1.3e-62	212.5	0	6	258	158	409	153	409	0.88	98.062
	Phvul.006G184700.2	-	459	PK_Tyr_Ser-Thr	PF07714.22	258	9.8e-63	212.9	0	1	1	6.1e-64	1.3e-62	212.5	0	6	258	158	409	153	409	0.92	98.062
	Phvul.002G091900.1	-	422	PK_Tyr_Ser-Thr	PF07714.22	258	3.9e-62	210.9	0	1	1	2.4e-63	4.9e-62	210.6	0	6	258	151	404	146	404	0.92	98.062
	Phvul.005G038600.1	-	313	PK_Tyr_Ser-Thr	PF07714.22	258	3.1e-60	204.7	0	1	1	1.8e-61	3.7e-60	204.4	0	6	258	56	304	51	304	0.87	98.062
	Phvul.002G182900.2	-	369	PK_Tyr_Ser-Thr	PF07714.22	258	1.9e-52	179.2	0.1	1	1	1.2e-53	2.4e-52	178.8	0.1	4	256	24	289	21	291	0.87	98.062
	Phvul.002G182900.1	-	406	PK_Tyr_Ser-Thr	PF07714.22	258	2.4e-52	178.8	0.1	1	1	1.5e-53	3.2e-52	178.4	0.1	4	256	61	326	58	328	0.96	98.062
	Phvul.005G074300.1	-	698	PK_Tyr_Ser-Thr	PF07714.22	258	2.7e-51	175.4	0	1	1	2.3e-52	4.7e-51	174.6	0	4	256	18	263	15	264	0.91	98.062
	Phvul.002G177200.1	-	935	PK_Tyr_Ser-Thr	PF07714.22	258	1e-50	173.5	0	1	1	8.4e-52	1.7e-50	172.7	0	3	255	609	874	608	877	0.91	98.062
	Phvul.011G147100.1	-	815	PK_Tyr_Ser-Thr	PF07714.22	258	1.7e-50	172.7	0	1	1	1.2e-51	2.5e-50	172.2	0	3	255	500	766	498	769	0.83	98.062
	Phvul.010G018900.2	-	823	PK_Tyr_Ser-Thr	PF07714.22	258	3.8e-50	171.6	0	1	1	2.7e-51	5.5e-50	171.1	0	2	254	506	773	505	777	0.83	98.062
	Phvul.010G018900.1	-	825	PK_Tyr_Ser-Thr	PF07714.22	258	3.8e-50	171.6	0	1	1	2.7e-51	5.5e-50	171.1	0	2	254	508	775	507	779	0.95	98.062
	Phvul.009G239600.1	-	374	PK_Tyr_Ser-Thr	PF07714.22	258	4.1e-50	171.5	0	1	1	2.9e-51	5.9e-50	171	0	6	258	24	289	20	289	0.88	98.062
	Phvul.011G167800.1	-	1005	PK_Tyr_Ser-Thr	PF07714.22	258	4.7e-50	171.3	0	1	1	4.4e-51	9e-50	170.4	0	5	257	663	929	659	930	0.93	98.062
	Phvul.003G170200.1	-	499	PK_Tyr_Ser-Thr	PF07714.22	258	6.7e-50	170.8	0	1	1	4.7e-51	9.7e-50	170.3	0	6	258	218	485	213	485	0.91	98.062
	Phvul.009G025700.1	-	579	PK_Tyr_Ser-Thr	PF07714.22	258	7.6e-50	170.6	0	1	1	5.3e-51	1.1e-49	170.1	0	4	256	309	555	306	556	0.91	98.062
	Phvul.009G025700.2	-	579	PK_Tyr_Ser-Thr	PF07714.22	258	7.6e-50	170.6	0	1	1	5.3e-51	1.1e-49	170.1	0	4	256	309	555	306	556	0.82	98.062
	Phvul.002G049301.1	-	551	PK_Tyr_Ser-Thr	PF07714.22	258	7.8e-50	170.6	0	1	1	7.2e-51	1.5e-49	169.7	0	5	257	241	507	237	508	0.9	98.062
	Phvul.006G194700.1	-	829	PK_Tyr_Ser-Thr	PF07714.22	258	8.5e-50	170.5	0	1	1	6e-51	1.2e-49	169.9	0	4	256	514	780	511	782	0.93	98.062
	Phvul.002G220500.1	-	838	PK_Tyr_Ser-Thr	PF07714.22	258	2.4e-49	169	0	1	1	1.5e-50	3.2e-49	168.6	0	3	255	523	788	521	791	0.89	98.062
	Phvul.007G050500.1	-	669	PK_Tyr_Ser-Thr	PF07714.22	258	4e-49	168.3	0	1	1	2.7e-50	5.6e-49	167.8	0	4	256	344	612	341	614	0.93	98.062
	Phvul.008G056900.1	-	650	PK_Tyr_Ser-Thr	PF07714.22	258	4e-49	168.3	0	1	1	2.9e-50	5.9e-49	167.7	0	4	256	340	605	337	607	0.93	98.062
	Phvul.006G194500.1	-	849	PK_Tyr_Ser-Thr	PF07714.22	258	5.6e-49	167.8	0	1	1	3.7e-50	7.5e-49	167.4	0	4	256	537	802	534	804	0.94	98.062
	Phvul.003G287101.1	-	449	PK_Tyr_Ser-Thr	PF07714.22	258	5.6e-49	167.8	0	1	1	3.5e-50	7.1e-49	167.4	0	5	257	125	389	121	390	0.87	98.062
	Phvul.005G013100.1	-	362	PK_Tyr_Ser-Thr	PF07714.22	258	6.3e-49	167.6	1.1	1	1	3.8e-50	7.8e-49	167.3	0	6	258	62	319	58	319	0.85	98.062
	Phvul.008G077800.1	-	664	PK_Tyr_Ser-Thr	PF07714.22	258	1.5e-48	166.4	0	1	1	2.4e-49	5e-48	164.7	0	4	256	347	614	344	616	0.89	98.062
	Phvul.003G239300.2	-	832	PK_Tyr_Ser-Thr	PF07714.22	258	1.6e-48	166.3	0	1	1	1.2e-49	2.5e-48	165.7	0	3	255	491	756	489	759	0.81	98.062
	Phvul.002G046100.1	-	810	PK_Tyr_Ser-Thr	PF07714.22	258	1.6e-48	166.3	0	1	1	1.6e-49	3.4e-48	165.2	0	3	255	523	794	522	797	0.81	98.062
	Phvul.002G046100.2	-	810	PK_Tyr_Ser-Thr	PF07714.22	258	1.6e-48	166.3	0	1	1	1.6e-49	3.4e-48	165.2	0	3	255	523	794	522	797	0.89	98.062
	Phvul.011G150100.1	-	772	PK_Tyr_Ser-Thr	PF07714.22	258	2.7e-48	165.5	0	1	1	2e-49	4.1e-48	165	0	3	255	455	722	453	725	0.89	98.062
	Phvul.003G137700.3	-	353	PK_Tyr_Ser-Thr	PF07714.22	258	2.8e-48	165.5	0	1	1	1.7e-49	3.5e-48	165.2	0	5	257	42	308	38	309	0.89	98.062
	Phvul.004G112000.1	-	896	PK_Tyr_Ser-Thr	PF07714.22	258	3.2e-48	165.3	0	1	1	2.1e-49	4.3e-48	164.9	0	3	255	412	661	410	663	0.92	98.062
	Phvul.008G168100.1	-	584	PK_Tyr_Ser-Thr	PF07714.22	258	3.2e-48	165.3	0	1	1	2.1e-49	4.3e-48	164.9	0	4	256	315	561	312	563	0.89	98.062
	Phvul.003G269700.1	-	398	PK_Tyr_Ser-Thr	PF07714.22	258	4.3e-48	164.9	0	1	1	3.4e-49	7e-48	164.2	0	5	257	87	364	83	365	0.89	98.062
	Phvul.003G137700.2	-	429	PK_Tyr_Ser-Thr	PF07714.22	258	4.8e-48	164.7	0	1	1	3.1e-49	6.3e-48	164.3	0	5	257	118	384	114	385	0.89	98.062
	Phvul.003G137700.1	-	448	PK_Tyr_Ser-Thr	PF07714.22	258	5.5e-48	164.5	0	1	1	3.5e-49	7.2e-48	164.2	0	5	257	137	403	133	404	0.87	98.062
	Phvul.008G264400.2	-	932	PK_Tyr_Ser-Thr	PF07714.22	258	5.9e-48	164.4	0	1	1	5e-49	1e-47	163.6	0	4	256	588	855	585	857	0.86	98.062
	Phvul.002G119900.1	-	693	PK_Tyr_Ser-Thr	PF07714.22	258	5.9e-48	164.4	0	1	1	4.5e-49	9.2e-48	163.8	0	4	256	364	632	361	634	0.87	98.062
	Phvul.008G264400.1	-	1027	PK_Tyr_Ser-Thr	PF07714.22	258	7e-48	164.2	0	1	1	6e-49	1.2e-47	163.4	0	4	256	683	950	680	952	0.87	98.062
	Phvul.005G077400.1	-	617	PK_Tyr_Ser-Thr	PF07714.22	258	1.1e-47	163.5	0	1	1	1.1e-48	2.2e-47	162.5	0	4	256	277	543	274	545	0.9	98.062
	Phvul.004G124900.1	-	847	PK_Tyr_Ser-Thr	PF07714.22	258	1.2e-47	163.4	0	1	1	9.2e-49	1.9e-47	162.8	0	4	256	526	794	523	796	0.84	98.062
	Phvul.001G265500.1	-	931	PK_Tyr_Ser-Thr	PF07714.22	258	1.2e-47	163.4	0	1	1	1.1e-48	2.2e-47	162.5	0	3	255	586	857	584	860	0.92	98.062
	Phvul.002G115800.3	-	359	PK_Tyr_Ser-Thr	PF07714.22	258	1.3e-47	163.4	0	1	1	8.1e-49	1.7e-47	163	0	6	258	71	348	66	348	0.92	98.062
	Phvul.002G115800.1	-	361	PK_Tyr_Ser-Thr	PF07714.22	258	1.3e-47	163.3	0	1	1	8.2e-49	1.7e-47	162.9	0	6	258	73	350	68	350	0.86	98.062
	Phvul.005G078900.2	-	726	PK_Tyr_Ser-Thr	PF07714.22	258	1.3e-47	163.3	0	1	1	1e-48	2.2e-47	162.6	0	5	257	397	663	393	664	0.86	98.062
	Phvul.006G084600.1	-	646	PK_Tyr_Ser-Thr	PF07714.22	258	1.5e-47	163.1	0	1	1	1.2e-48	2.4e-47	162.4	0	4	256	328	597	325	599	0.96	98.062
	Phvul.007G004200.1	-	364	PK_Tyr_Ser-Thr	PF07714.22	258	2e-47	162.7	0	1	1	1.3e-48	2.6e-47	162.3	0	6	258	76	349	72	349	0.96	98.062
	Phvul.007G004200.2	-	364	PK_Tyr_Ser-Thr	PF07714.22	258	2e-47	162.7	0	1	1	1.3e-48	2.6e-47	162.3	0	6	258	76	349	72	349	0.85	98.062
	Phvul.002G046500.2	-	788	PK_Tyr_Ser-Thr	PF07714.22	258	2.6e-47	162.3	0	1	1	2.8e-48	5.8e-47	161.2	0	4	256	487	758	485	760	0.96	98.062
	Phvul.007G004200.3	-	404	PK_Tyr_Ser-Thr	PF07714.22	258	2.7e-47	162.2	0	1	1	1.8e-48	3.7e-47	161.8	0	6	258	116	389	112	389	0.91	98.062
	Phvul.007G221800.1	-	1111	PK_Tyr_Ser-Thr	PF07714.22	258	3e-47	162.1	0	1	1	2e-48	4.2e-47	161.6	0	6	258	818	1086	813	1086	0.95	98.062
	Phvul.001G216800.1	-	361	PK_Tyr_Ser-Thr	PF07714.22	258	3.1e-47	162.1	0	1	1	1.9e-48	3.9e-47	161.8	0	6	258	74	345	70	345	0.95	98.062
	Phvul.001G216800.3	-	361	PK_Tyr_Ser-Thr	PF07714.22	258	3.1e-47	162.1	0	1	1	1.9e-48	3.9e-47	161.8	0	6	258	74	345	70	345	0.95	98.062
	Phvul.001G216800.4	-	361	PK_Tyr_Ser-Thr	PF07714.22	258	3.1e-47	162.1	0	1	1	1.9e-48	3.9e-47	161.8	0	6	258	74	345	70	345	0.91	98.062
	Phvul.008G077200.1	-	434	PK_Tyr_Ser-Thr	PF07714.22	258	3.3e-47	162	0	1	1	2.4e-48	5e-47	161.4	0	6	258	94	366	90	366	0.9	98.062
	Phvul.007G053700.1	-	624	PK_Tyr_Ser-Thr	PF07714.22	258	3.8e-47	161.8	0	1	1	2.6e-48	5.4e-47	161.3	0	4	256	53	309	50	310	0.86	98.062
	Phvul.003G021700.1	-	407	PK_Tyr_Ser-Thr	PF07714.22	258	3.8e-47	161.8	0	1	1	2.5e-48	5.2e-47	161.3	0	3	255	54	319	52	322	0.89	98.062
	Phvul.007G072801.1	-	923	PK_Tyr_Ser-Thr	PF07714.22	258	4.1e-47	161.7	0	1	1	2.8e-48	5.7e-47	161.2	0	3	255	437	686	435	688	0.89	98.062
	Phvul.007G072801.2	-	923	PK_Tyr_Ser-Thr	PF07714.22	258	4.1e-47	161.7	0	1	1	2.8e-48	5.7e-47	161.2	0	3	255	437	686	435	688	0.88	98.062
	Phvul.011G156200.1	-	793	PK_Tyr_Ser-Thr	PF07714.22	258	4.4e-47	161.6	0	1	1	3.5e-48	7.2e-47	160.9	0	3	255	477	743	475	746	0.87	98.062
	Phvul.003G063700.1	-	615	PK_Tyr_Ser-Thr	PF07714.22	258	4.6e-47	161.5	0	1	1	6.3e-48	1.3e-46	160	0	4	256	314	585	311	587	0.91	98.062
	Phvul.004G027300.1	-	466	PK_Tyr_Ser-Thr	PF07714.22	258	5.7e-47	161.2	0	1	1	5e-48	1e-46	160.4	0	6	258	112	388	107	388	0.83	98.062
	Phvul.005G078500.1	-	998	PK_Tyr_Ser-Thr	PF07714.22	258	6.3e-47	161.1	0	1	1	4.5e-48	9.2e-47	160.5	0	3	255	666	932	664	935	0.93	98.062
	Phvul.007G241300.1	-	1340	PK_Tyr_Ser-Thr	PF07714.22	258	6.4e-47	161	0.1	1	1	9e-48	1.9e-46	159.5	0	3	255	8	251	6	253	0.9	98.062
	Phvul.011G108700.1	-	1011	PK_Tyr_Ser-Thr	PF07714.22	258	8.2e-47	160.7	0	1	1	5.9e-48	1.2e-46	160.1	0	4	256	696	962	693	964	0.88	98.062
	Phvul.007G052500.1	-	665	PK_Tyr_Ser-Thr	PF07714.22	258	8.3e-47	160.7	0	1	1	6.1e-48	1.3e-46	160.1	0	4	256	336	601	333	603	0.91	98.062
	Phvul.010G163200.4	-	494	PK_Tyr_Ser-Thr	PF07714.22	258	1.3e-46	160.1	0	1	1	1e-47	2.1e-46	159.4	0	4	256	25	279	23	280	0.81	98.062
	Phvul.001G173600.1	-	355	PK_Tyr_Ser-Thr	PF07714.22	258	1.3e-46	160.1	0	1	1	1.3e-47	2.8e-46	158.9	0	4	256	52	321	49	323	0.91	98.062
	Phvul.010G163200.3	-	507	PK_Tyr_Ser-Thr	PF07714.22	258	1.3e-46	160	0	1	1	1.1e-47	2.2e-46	159.3	0	4	256	25	279	23	280	0.81	98.062
	Phvul.007G154500.1	-	727	PK_Tyr_Ser-Thr	PF07714.22	258	1.6e-46	159.7	0	1	1	2.7e-47	5.6e-46	158	0	4	256	343	610	340	612	0.88	98.062
	Phvul.008G115500.1	-	655	PK_Tyr_Ser-Thr	PF07714.22	258	1.8e-46	159.5	0	1	1	2e-47	4.1e-46	158.4	0	5	257	367	640	363	641	0.88	98.062
	Phvul.007G049600.1	-	685	PK_Tyr_Ser-Thr	PF07714.22	258	2.2e-46	159.3	0	1	1	1.5e-47	3.2e-46	158.8	0	4	256	356	621	353	623	0.87	98.062
	Phvul.007G268200.2	-	910	PK_Tyr_Ser-Thr	PF07714.22	258	2.2e-46	159.3	0	1	1	1.5e-47	3.2e-46	158.7	0	4	256	567	838	564	840	0.9	98.062
	Phvul.009G011400.1	-	383	PK_Tyr_Ser-Thr	PF07714.22	258	2.2e-46	159.3	0	1	1	1.6e-47	3.4e-46	158.7	0	5	257	65	340	61	341	0.85	98.062
	Phvul.001G195500.1	-	942	PK_Tyr_Ser-Thr	PF07714.22	258	2.3e-46	159.2	0	1	1	1.6e-47	3.3e-46	158.7	0	4	256	599	870	596	872	0.94	98.062
	Phvul.009G239500.1	-	413	PK_Tyr_Ser-Thr	PF07714.22	258	2.4e-46	159.2	0	1	1	1.7e-47	3.5e-46	158.6	0	5	257	78	344	75	345	0.87	98.062
	Phvul.007G268200.1	-	958	PK_Tyr_Ser-Thr	PF07714.22	258	2.4e-46	159.1	0	1	1	1.7e-47	3.5e-46	158.6	0	4	256	615	886	612	888	0.91	98.062
	Phvul.010G163200.2	-	696	PK_Tyr_Ser-Thr	PF07714.22	258	2.6e-46	159	0	1	1	2.2e-47	4.6e-46	158.2	0	4	256	25	279	23	280	0.91	98.062
	Phvul.010G163200.1	-	703	PK_Tyr_Ser-Thr	PF07714.22	258	2.7e-46	159	0	1	1	2.3e-47	4.7e-46	158.2	0	4	256	25	279	23	280	0.93	98.062
	Phvul.002G065500.1	-	485	PK_Tyr_Ser-Thr	PF07714.22	258	3.2e-46	158.8	0	1	1	3.1e-47	6.4e-46	157.8	0	6	258	134	409	129	409	0.88	98.062
	Phvul.006G180200.1	-	930	PK_Tyr_Ser-Thr	PF07714.22	258	3.7e-46	158.5	0	1	1	2.5e-47	5.2e-46	158	0	5	257	613	876	609	877	0.9	98.062
	Phvul.002G089100.1	-	410	PK_Tyr_Ser-Thr	PF07714.22	258	3.9e-46	158.5	0	1	1	3e-47	6.1e-46	157.8	0	5	257	79	354	75	355	0.9	98.062
	Phvul.010G043100.1	-	429	PK_Tyr_Ser-Thr	PF07714.22	258	4e-46	158.4	0	1	1	2.9e-47	6e-46	157.9	0	6	258	80	356	75	356	0.88	98.062
	Phvul.009G138532.1	-	493	PK_Tyr_Ser-Thr	PF07714.22	258	4.2e-46	158.4	0	1	1	2.7e-47	5.5e-46	158	0	4	256	183	450	180	452	0.92	98.062
	Phvul.002G066400.1	-	484	PK_Tyr_Ser-Thr	PF07714.22	258	4.3e-46	158.3	0	1	1	5.1e-47	1.1e-45	157.1	0	6	258	134	409	129	409	0.92	98.062
	Phvul.002G066400.2	-	484	PK_Tyr_Ser-Thr	PF07714.22	258	4.3e-46	158.3	0	1	1	5.1e-47	1.1e-45	157.1	0	6	258	134	409	129	409	0.92	98.062
	Phvul.002G066400.3	-	484	PK_Tyr_Ser-Thr	PF07714.22	258	4.3e-46	158.3	0	1	1	5.1e-47	1.1e-45	157.1	0	6	258	134	409	129	409	0.95	98.062
	Phvul.003G120800.1	-	360	PK_Tyr_Ser-Thr	PF07714.22	258	5.1e-46	158.1	0	1	1	3.2e-47	6.6e-46	157.7	0	6	258	72	343	68	343	0.95	98.062
	Phvul.003G120800.2	-	360	PK_Tyr_Ser-Thr	PF07714.22	258	5.1e-46	158.1	0	1	1	3.2e-47	6.6e-46	157.7	0	6	258	72	343	68	343	0.88	98.062
	Phvul.007G260500.1	-	657	PK_Tyr_Ser-Thr	PF07714.22	258	5.8e-46	157.9	0	1	1	4.6e-47	9.4e-46	157.2	0	3	255	338	606	336	609	0.86	98.062
	Phvul.002G017700.1	-	503	PK_Tyr_Ser-Thr	PF07714.22	258	7.2e-46	157.6	0	1	1	5e-47	1e-45	157.1	0	5	257	176	442	172	443	0.91	98.062
	Phvul.009G011400.2	-	380	PK_Tyr_Ser-Thr	PF07714.22	258	7.6e-46	157.5	0	1	1	5.6e-47	1.2e-45	156.9	0	5	257	65	337	61	338	0.88	98.062
	Phvul.008G059400.1	-	493	PK_Tyr_Ser-Thr	PF07714.22	258	1.5e-45	156.6	0	1	1	9.4e-47	1.9e-45	156.2	0	5	257	169	435	165	436	0.8	98.062
	Phvul.007G048500.1	-	677	PK_Tyr_Ser-Thr	PF07714.22	258	1.5e-45	156.6	0	1	1	1.3e-46	2.7e-45	155.7	0	4	256	348	613	345	615	0.92	98.062
	Phvul.003G038800.1	-	840	PK_Tyr_Ser-Thr	PF07714.22	258	1.6e-45	156.5	0	1	1	1.1e-46	2.2e-45	156	0	6	258	528	793	523	793	0.9	98.062
	Phvul.007G241300.2	-	1346	PK_Tyr_Ser-Thr	PF07714.22	258	1.6e-45	156.5	0.1	1	1	2.2e-46	4.6e-45	155	0	3	255	8	257	6	259	0.89	98.062
	Phvul.011G152100.1	-	819	PK_Tyr_Ser-Thr	PF07714.22	258	1.7e-45	156.3	0	1	1	2.1e-46	4.3e-45	155	0	5	257	509	774	505	775	0.89	98.062
	Phvul.002G290600.2	-	1168	PK_Tyr_Ser-Thr	PF07714.22	258	3.6e-45	155.3	0	1	1	2.9e-46	5.9e-45	154.6	0	4	256	403	652	400	653	0.91	98.062
	Phvul.003G062700.2	-	533	PK_Tyr_Ser-Thr	PF07714.22	258	4.1e-45	155.1	0	1	1	2.9e-46	5.9e-45	154.6	0	4	256	215	478	212	480	0.88	98.062
	Phvul.003G130400.1	-	480	PK_Tyr_Ser-Thr	PF07714.22	258	5e-45	154.8	0	1	1	5.2e-46	1.1e-44	153.7	0	5	257	82	354	78	355	0.9	98.062
	Phvul.006G091500.1	-	653	PK_Tyr_Ser-Thr	PF07714.22	258	5.9e-45	154.6	0	1	1	4.1e-46	8.4e-45	154.1	0	4	256	68	324	65	325	0.91	98.062
	Phvul.003G062700.1	-	655	PK_Tyr_Ser-Thr	PF07714.22	258	6.5e-45	154.4	0	1	1	4.7e-46	9.6e-45	153.9	0	4	256	337	600	334	602	0.88	98.062
	Phvul.001G019100.1	-	683	PK_Tyr_Ser-Thr	PF07714.22	258	1.3e-44	153.5	0	1	1	8.4e-46	1.7e-44	153.1	0	4	256	310	564	307	566	0.89	98.062
	Phvul.001G090800.2	-	419	PK_Tyr_Ser-Thr	PF07714.22	258	1.8e-44	153	0	1	1	2.7e-45	5.5e-44	151.4	0	6	258	80	347	75	347	0.89	98.062
	Phvul.001G090800.4	-	419	PK_Tyr_Ser-Thr	PF07714.22	258	1.8e-44	153	0	1	1	2.7e-45	5.5e-44	151.4	0	6	258	80	347	75	347	0.87	98.062
	Phvul.006G200800.1	-	639	PK_Tyr_Ser-Thr	PF07714.22	258	2.6e-44	152.5	0	1	1	1.8e-45	3.7e-44	152	0	4	256	329	593	326	595	0.91	98.062
	Phvul.008G279300.1	-	662	PK_Tyr_Ser-Thr	PF07714.22	258	4.2e-44	151.8	0	1	1	2.8e-45	5.8e-44	151.4	0	5	257	348	613	344	614	0.92	98.062
	Phvul.006G146100.1	-	713	PK_Tyr_Ser-Thr	PF07714.22	258	6.2e-44	151.3	0	1	1	4e-45	8.3e-44	150.8	0	6	258	409	679	404	679	0.82	98.062
	Phvul.001G163800.1	-	1229	PK_Tyr_Ser-Thr	PF07714.22	258	6.6e-44	151.2	0	1	1	4.7e-45	9.7e-44	150.6	0	6	258	934	1204	930	1204	0.83	98.062
	Phvul.001G163700.1	-	1239	PK_Tyr_Ser-Thr	PF07714.22	258	9.3e-44	150.7	0	1	1	6.5e-45	1.3e-43	150.2	0	6	258	939	1209	935	1209	0.92	98.062
	Phvul.011G112700.1	-	814	PK_Tyr_Ser-Thr	PF07714.22	258	1.4e-43	150.1	0	1	1	9.4e-45	1.9e-43	149.6	0	4	256	527	796	524	798	0.85	98.062
	Phvul.006G108400.2	-	389	PK_Tyr_Ser-Thr	PF07714.22	258	2e-42	146.3	0	1	1	2.6e-43	5.4e-42	144.9	0	5	257	74	343	70	344	0.88	98.062
	Phvul.001G040000.1	-	666	PK_Tyr_Ser-Thr	PF07714.22	258	3.3e-42	145.6	0	1	1	2.1e-43	4.4e-42	145.2	0	4	256	355	617	352	619	0.85	98.062
	Phvul.009G061350.1	-	534	PK_Tyr_Ser-Thr	PF07714.22	258	3.7e-42	145.4	0	1	1	5.6e-43	1.1e-41	143.8	0	4	256	164	433	161	435	0.86	98.062
	Phvul.008G156400.1	-	664	PK_Tyr_Ser-Thr	PF07714.22	258	3.9e-42	145.4	0	1	1	2.8e-43	5.7e-42	144.8	0	3	255	328	591	326	594	0.85	98.062
	Phvul.011G007200.1	-	1020	PK_Tyr_Ser-Thr	PF07714.22	258	4e-42	145.3	0	1	1	3e-43	6.2e-42	144.7	0	4	256	708	978	706	980	0.83	98.062
	Phvul.005G164500.1	-	880	PK_Tyr_Ser-Thr	PF07714.22	258	4.9e-42	145	0	1	1	1.3e-42	2.7e-41	142.6	0	3	255	577	841	576	844	0.91	98.062
	Phvul.002G276900.1	-	595	PK_Tyr_Ser-Thr	PF07714.22	258	5.3e-42	144.9	0	1	1	3.7e-43	7.6e-42	144.4	0	5	257	277	545	273	546	0.88	98.062
	Phvul.002G304500.1	-	676	PK_Tyr_Ser-Thr	PF07714.22	258	6.7e-42	144.6	0	1	1	5.7e-43	1.2e-41	143.8	0	5	257	404	669	400	670	0.81	98.062
	Phvul.003G040200.1	-	1131	PK_Tyr_Ser-Thr	PF07714.22	258	6.7e-42	144.6	0	1	1	4.6e-43	9.5e-42	144.1	0	5	257	788	1061	784	1062	0.9	98.062
	Phvul.002G125100.1	-	595	PK_Tyr_Ser-Thr	PF07714.22	258	7.6e-42	144.4	0	1	1	5.3e-43	1.1e-41	143.9	0	4	256	313	575	310	577	0.85	98.062
	Phvul.001G040500.1	-	661	PK_Tyr_Ser-Thr	PF07714.22	258	9.4e-42	144.1	0	1	1	6.3e-43	1.3e-41	143.6	0	4	256	352	614	349	616	0.9	98.062
	Phvul.005G106800.1	-	807	PK_Tyr_Ser-Thr	PF07714.22	258	1e-41	144	0	1	1	7.3e-43	1.5e-41	143.4	0	4	256	521	790	518	792	0.88	98.062
	Phvul.008G106500.1	-	1032	PK_Tyr_Ser-Thr	PF07714.22	258	1.2e-41	143.8	0	1	1	8.7e-43	1.8e-41	143.2	0	4	256	761	1028	758	1029	0.93	98.062
	Phvul.001G040700.1	-	672	PK_Tyr_Ser-Thr	PF07714.22	258	1.4e-41	143.5	0	1	1	9.7e-43	2e-41	143	0	5	257	361	623	358	624	0.81	98.062
	Phvul.005G164300.1	-	877	PK_Tyr_Ser-Thr	PF07714.22	258	1.5e-41	143.4	0	1	1	2e-42	4.1e-41	142	0	3	255	574	838	573	841	0.88	98.062
	Phvul.008G029500.1	-	343	PK_Tyr_Ser-Thr	PF07714.22	258	1.9e-41	143.1	0	1	1	1.5e-42	3e-41	142.4	0	4	256	47	310	44	312	0.91	98.062
	Phvul.006G033300.1	-	346	PK_Tyr_Ser-Thr	PF07714.22	258	3.2e-41	142.4	0	1	1	2.3e-42	4.7e-41	141.8	0	3	255	84	324	83	327	0.83	98.062
	Phvul.010G140200.1	-	750	PK_Tyr_Ser-Thr	PF07714.22	258	6.1e-41	141.5	0	1	1	7.3e-42	1.5e-40	140.2	0	5	257	407	672	403	673	0.86	98.062
	Phvul.001G040300.1	-	664	PK_Tyr_Ser-Thr	PF07714.22	258	6.5e-41	141.4	0	1	1	4.3e-42	8.9e-41	140.9	0	4	256	355	617	352	619	0.88	98.062
	Phvul.006G220800.1	-	341	PK_Tyr_Ser-Thr	PF07714.22	258	7.5e-41	141.1	0	1	1	4.9e-42	1e-40	140.7	0	4	256	18	260	16	261	0.83	98.062
	Phvul.005G160700.1	-	697	PK_Tyr_Ser-Thr	PF07714.22	258	7.9e-41	141.1	0	1	1	1.9e-41	4e-40	138.8	0	5	257	408	673	404	674	0.88	98.062
	Phvul.005G073800.1	-	1054	PK_Tyr_Ser-Thr	PF07714.22	258	2e-40	139.8	0	1	1	1.6e-41	3.3e-40	139	0	4	256	776	1042	773	1044	0.8	98.062
	Phvul.001G146800.1	-	403	PK_Tyr_Ser-Thr	PF07714.22	258	2.4e-40	139.5	0	1	1	2.1e-41	4.3e-40	138.7	0	4	256	113	373	110	375	0.82	98.062
	Phvul.009G046900.1	-	993	PK_Tyr_Ser-Thr	PF07714.22	258	2.8e-40	139.2	0	1	1	2e-40	4.1e-39	135.5	0	4	256	678	981	675	983	0.83	98.062
	Phvul.008G045200.1	-	741	PK_Tyr_Ser-Thr	PF07714.22	258	4.7e-40	138.5	0	1	1	3e-41	6.1e-40	138.2	0	4	256	446	708	443	710	0.91	98.062
	Phvul.008G159500.1	-	1086	PK_Tyr_Ser-Thr	PF07714.22	258	1.5e-39	136.9	0	1	1	1e-40	2.1e-39	136.4	0	5	257	762	1032	758	1033	0.85	98.062
	Phvul.008G047600.1	-	778	PK_Tyr_Ser-Thr	PF07714.22	258	2.8e-39	136	0	1	1	1.9e-40	3.9e-39	135.5	0	6	258	494	758	489	758	0.87	98.062
	Phvul.009G260500.1	-	1125	PK_Tyr_Ser-Thr	PF07714.22	258	7.1e-39	134.7	0	1	1	5.3e-40	1.1e-38	134.1	0	4	256	844	1110	841	1112	0.84	98.062
	Phvul.008G122200.1	-	1153	PK_Tyr_Ser-Thr	PF07714.22	258	7.4e-39	134.6	0	1	1	7.7e-40	1.6e-38	133.5	0	4	256	813	1092	810	1094	0.85	98.062
	Phvul.001G137300.2	-	794	PK_Tyr_Ser-Thr	PF07714.22	258	7.6e-39	134.6	0	1	1	5.1e-40	1e-38	134.1	0	6	258	507	771	502	771	0.85	98.062
	Phvul.001G137300.1	-	884	PK_Tyr_Ser-Thr	PF07714.22	258	9.4e-39	134.3	0	1	1	6.3e-40	1.3e-38	133.8	0	6	258	597	861	592	861	0.83	98.062
	Phvul.001G083300.1	-	1055	PK_Tyr_Ser-Thr	PF07714.22	258	1.6e-38	133.5	0	1	1	1.1e-39	2.4e-38	133	0	3	255	781	1047	779	1050	0.87	98.062
	Phvul.009G136200.1	-	1087	PK_Tyr_Ser-Thr	PF07714.22	258	3.2e-38	132.5	0	1	1	2.4e-39	4.8e-38	131.9	0	5	257	766	1036	762	1037	0.9	98.062
	Phvul.008G050700.2	-	509	PK_Tyr_Ser-Thr	PF07714.22	258	4.2e-38	132.2	0	1	1	3.1e-39	6.4e-38	131.6	0	4	256	200	469	197	471	0.89	98.062
	Phvul.007G137800.1	-	1088	PK_Tyr_Ser-Thr	PF07714.22	258	4.2e-38	132.1	0	1	1	3.1e-39	6.4e-38	131.5	0	6	258	809	1080	804	1080	0.87	98.062
	Phvul.006G053100.1	-	299	PK_Tyr_Ser-Thr	PF07714.22	258	4.3e-38	132.1	0	1	1	2.6e-39	5.4e-38	131.8	0	4	256	30	281	28	282	0.9	98.062
	Phvul.008G050700.1	-	614	PK_Tyr_Ser-Thr	PF07714.22	258	7e-38	131.4	0	1	1	4.9e-39	1e-37	130.9	0	4	256	305	574	302	576	0.89	98.062
	Phvul.007G186800.1	-	620	PK_Tyr_Ser-Thr	PF07714.22	258	1.2e-37	130.7	0	1	1	8.2e-39	1.7e-37	130.2	0	3	255	6	253	4	255	0.88	98.062
	Phvul.005G184700.1	-	1084	PK_Tyr_Ser-Thr	PF07714.22	258	3.1e-37	129.3	0	1	1	2.4e-38	5e-37	128.6	0	6	258	799	1071	794	1071	0.89	98.062
	Phvul.006G100400.1	-	625	PK_Tyr_Ser-Thr	PF07714.22	258	6.5e-37	128.2	0	1	1	4.9e-38	1e-36	127.6	0	3	255	6	253	4	255	0.91	98.062
	Phvul.003G029700.1	-	627	PK_Tyr_Ser-Thr	PF07714.22	258	1e-36	127.6	0	1	1	7.3e-38	1.5e-36	127	0	5	257	336	595	333	596	0.9	98.062
	Phvul.008G205700.1	-	441	PK_Tyr_Ser-Thr	PF07714.22	258	1.3e-36	127.3	0	1	1	8.5e-38	1.7e-36	126.8	0	3	255	15	263	13	265	0.9	98.062
	Phvul.008G205700.2	-	441	PK_Tyr_Ser-Thr	PF07714.22	258	1.3e-36	127.3	0	1	1	8.5e-38	1.7e-36	126.8	0	3	255	15	263	13	265	0.9	98.062
	Phvul.008G205700.3	-	441	PK_Tyr_Ser-Thr	PF07714.22	258	1.3e-36	127.3	0	1	1	8.5e-38	1.7e-36	126.8	0	3	255	15	263	13	265	0.9	98.062
	Phvul.008G205700.4	-	441	PK_Tyr_Ser-Thr	PF07714.22	258	1.3e-36	127.3	0	1	1	8.5e-38	1.7e-36	126.8	0	3	255	15	263	13	265	0.79	98.062
	Phvul.009G114400.1	-	959	PK_Tyr_Ser-Thr	PF07714.22	258	1.4e-36	127.2	0	1	1	1.3e-37	2.7e-36	126.2	0	5	257	653	928	649	929	0.86	98.062
	Phvul.008G245000.1	-	809	PK_Tyr_Ser-Thr	PF07714.22	258	2e-36	126.7	0	1	1	1.5e-37	3.1e-36	126	0	6	258	477	748	472	748	0.86	98.062
	Phvul.008G275100.1	-	306	PK_Tyr_Ser-Thr	PF07714.22	258	2.8e-36	126.2	0	1	1	1.8e-37	3.6e-36	125.8	0	4	256	43	294	41	295	0.88	98.062
	Phvul.008G236900.1	-	644	PK_Tyr_Ser-Thr	PF07714.22	258	8.6e-36	124.6	0	1	1	7.1e-37	1.5e-35	123.8	0	5	257	339	600	336	601	0.88	98.062
	Phvul.002G331400.1	-	658	PK_Tyr_Ser-Thr	PF07714.22	258	8.9e-36	124.5	0	1	1	7e-37	1.4e-35	123.8	0	5	257	369	630	366	631	0.86	98.062
	Phvul.002G138400.1	-	341	PK_Tyr_Ser-Thr	PF07714.22	258	9.7e-36	124.4	0	1	1	6e-37	1.2e-35	124	0	3	255	64	329	62	331	0.89	98.062
	Phvul.006G020900.1	-	440	PK_Tyr_Ser-Thr	PF07714.22	258	1.6e-35	123.7	0	1	1	1.1e-36	2.2e-35	123.2	0	3	255	15	263	13	265	0.89	98.062
	Phvul.006G020900.2	-	440	PK_Tyr_Ser-Thr	PF07714.22	258	1.6e-35	123.7	0	1	1	1.1e-36	2.2e-35	123.2	0	3	255	15	263	13	265	0.89	98.062
	Phvul.006G020900.4	-	440	PK_Tyr_Ser-Thr	PF07714.22	258	1.6e-35	123.7	0	1	1	1.1e-36	2.2e-35	123.2	0	3	255	15	263	13	265	0.89	98.062
	Phvul.006G020900.5	-	440	PK_Tyr_Ser-Thr	PF07714.22	258	1.6e-35	123.7	0	1	1	1.1e-36	2.2e-35	123.2	0	3	255	15	263	13	265	0.89	98.062
	Phvul.006G020900.6	-	440	PK_Tyr_Ser-Thr	PF07714.22	258	1.6e-35	123.7	0	1	1	1.1e-36	2.2e-35	123.2	0	3	255	15	263	13	265	0.89	98.062
	Phvul.006G020900.7	-	440	PK_Tyr_Ser-Thr	PF07714.22	258	1.6e-35	123.7	0	1	1	1.1e-36	2.2e-35	123.2	0	3	255	15	263	13	265	0.89	98.062
	Phvul.006G020900.8	-	440	PK_Tyr_Ser-Thr	PF07714.22	258	1.6e-35	123.7	0	1	1	1.1e-36	2.2e-35	123.2	0	3	255	15	263	13	265	0.89	98.062
	Phvul.006G020900.9	-	440	PK_Tyr_Ser-Thr	PF07714.22	258	1.6e-35	123.7	0	1	1	1.1e-36	2.2e-35	123.2	0	3	255	15	263	13	265	0.89	98.062
	Phvul.004G149100.1	-	673	PK_Tyr_Ser-Thr	PF07714.22	258	1.7e-35	123.6	0	1	1	1.3e-36	2.6e-35	123	0	5	257	380	641	377	642	0.82	98.062
	Phvul.008G031100.1	-	311	PK_Tyr_Ser-Thr	PF07714.22	258	1.9e-35	123.5	0	1	1	1.2e-36	2.4e-35	123.1	0	6	258	32	299	27	299	0.84	98.062
	Phvul.010G115800.2	-	662	PK_Tyr_Ser-Thr	PF07714.22	258	3.6e-35	122.5	0	1	1	2.4e-36	4.9e-35	122.1	0	2	254	39	289	38	292	0.84	98.062
	Phvul.010G115800.1	-	663	PK_Tyr_Ser-Thr	PF07714.22	258	3.6e-35	122.5	0	1	1	2.4e-36	4.9e-35	122.1	0	2	254	39	289	38	292	0.81	98.062
	Phvul.008G281500.3	-	831	PK_Tyr_Ser-Thr	PF07714.22	258	4.6e-35	122.2	0	1	1	3.5e-36	7.2e-35	121.5	0	3	255	523	794	521	797	0.89	98.062
	Phvul.002G162400.1	-	590	PK_Tyr_Ser-Thr	PF07714.22	258	4.6e-35	122.2	0	1	1	5e-36	1e-34	121	0	5	257	292	555	289	556	0.91	98.062
	Phvul.008G154200.1	-	661	PK_Tyr_Ser-Thr	PF07714.22	258	7.3e-35	121.5	0	1	1	4.7e-36	9.7e-35	121.1	0	5	257	399	656	395	657	0.87	98.062
	Phvul.003G294300.1	-	599	PK_Tyr_Ser-Thr	PF07714.22	258	2.2e-34	120	0	1	1	1.5e-35	3.1e-34	119.4	0	1	253	145	400	145	404	0.89	98.062
	Phvul.002G295600.1	-	637	PK_Tyr_Ser-Thr	PF07714.22	258	3.9e-34	119.1	0	1	1	3.7e-35	7.5e-34	118.2	0	5	257	330	593	327	594	0.9	98.062
	Phvul.007G029900.1	-	667	PK_Tyr_Ser-Thr	PF07714.22	258	4.4e-34	119	0	1	1	3.2e-35	6.6e-34	118.4	0	5	257	365	633	362	634	0.9	98.062
	Phvul.003G159700.1	-	645	PK_Tyr_Ser-Thr	PF07714.22	258	1.3e-33	117.4	0	1	1	9e-35	1.8e-33	116.9	0	5	257	343	604	340	605	0.83	98.062
	Phvul.009G148000.1	-	660	PK_Tyr_Ser-Thr	PF07714.22	258	1.5e-33	117.2	0	1	1	1.1e-34	2.2e-33	116.7	0	2	254	34	284	33	287	0.89	98.062
	Phvul.008G080500.1	-	607	PK_Tyr_Ser-Thr	PF07714.22	258	2.7e-33	116.4	0	1	1	1.9e-34	3.9e-33	115.9	0	5	257	336	598	333	599	0.9	98.062
	Phvul.004G136100.1	-	617	PK_Tyr_Ser-Thr	PF07714.22	258	4.8e-33	115.6	0	1	1	3.6e-34	7.3e-33	115	0	5	257	336	605	333	606	0.86	98.062
	Phvul.003G247000.1	-	360	PK_Tyr_Ser-Thr	PF07714.22	258	7.1e-33	115	0	1	1	4.8e-34	9.9e-33	114.5	0	3	255	25	274	23	276	0.86	98.062
	Phvul.002G249300.1	-	310	PK_Tyr_Ser-Thr	PF07714.22	258	1.5e-32	114	0	1	1	1.1e-33	2.2e-32	113.4	0	4	256	8	256	6	257	0.87	98.062
	Phvul.008G186900.1	-	644	PK_Tyr_Ser-Thr	PF07714.22	258	6.7e-32	111.8	0	1	1	4.7e-33	9.8e-32	111.3	0	5	257	355	619	352	620	0.87	98.062
	Phvul.008G186900.2	-	644	PK_Tyr_Ser-Thr	PF07714.22	258	6.7e-32	111.8	0	1	1	4.7e-33	9.8e-32	111.3	0	5	257	355	619	352	620	0.81	98.062
	Phvul.008G210200.2	-	662	PK_Tyr_Ser-Thr	PF07714.22	258	9.4e-32	111.3	0	1	1	1.1e-32	2.3e-31	110	0	4	256	387	653	384	654	0.81	98.062
	Phvul.008G210200.1	-	679	PK_Tyr_Ser-Thr	PF07714.22	258	1e-31	111.2	0	1	1	1.2e-32	2.5e-31	110	0	4	256	404	670	401	671	0.86	98.062
	Phvul.003G012300.1	-	364	PK_Tyr_Ser-Thr	PF07714.22	258	1.2e-31	111	0	1	1	8.7e-33	1.8e-31	110.4	0	3	255	25	274	23	276	0.85	98.062
	Phvul.011G033000.3	-	664	PK_Tyr_Ser-Thr	PF07714.22	258	1.8e-31	110.4	0	1	1	1.8e-32	3.7e-31	109.4	0	5	257	363	627	360	628	0.85	98.062
	Phvul.011G033000.4	-	664	PK_Tyr_Ser-Thr	PF07714.22	258	1.8e-31	110.4	0	1	1	1.8e-32	3.7e-31	109.4	0	5	257	363	627	360	628	0.85	98.062
	Phvul.011G033000.2	-	669	PK_Tyr_Ser-Thr	PF07714.22	258	1.8e-31	110.4	0	1	1	1.8e-32	3.8e-31	109.3	0	5	257	368	632	365	633	0.85	98.062
	Phvul.002G178400.1	-	440	PK_Tyr_Ser-Thr	PF07714.22	258	3.4e-31	109.5	0	1	1	2.3e-32	4.7e-31	109	0	4	256	2	256	1	257	0.87	98.062
	Phvul.006G077100.1	-	613	PK_Tyr_Ser-Thr	PF07714.22	258	3.6e-31	109.4	0	1	1	2.6e-32	5.3e-31	108.9	0	4	256	30	281	27	283	0.88	98.062
	Phvul.006G207000.1	-	396	PK_Tyr_Ser-Thr	PF07714.22	258	4.3e-31	109.2	0	1	1	3.6e-32	7.5e-31	108.4	0	5	257	93	358	90	359	0.86	98.062
	Phvul.003G138278.1	-	439	PK_Tyr_Ser-Thr	PF07714.22	258	1.5e-30	107.4	0	1	1	9.6e-32	2e-30	107	0	2	254	25	274	24	277	0.85	98.062
	Phvul.004G122500.1	-	519	PK_Tyr_Ser-Thr	PF07714.22	258	1.6e-30	107.3	0	1	1	1e-31	2.1e-30	106.9	0	3	255	44	295	42	298	0.85	98.062
	Phvul.004G122500.3	-	519	PK_Tyr_Ser-Thr	PF07714.22	258	1.6e-30	107.3	0	1	1	1e-31	2.1e-30	106.9	0	3	255	44	295	42	298	0.87	98.062
	Phvul.009G067200.1	-	660	PK_Tyr_Ser-Thr	PF07714.22	258	6.1e-30	105.4	0	1	1	4.1e-31	8.5e-30	104.9	0	5	257	382	635	379	636	0.88	98.062
	Phvul.002G161200.1	-	502	PK_Tyr_Ser-Thr	PF07714.22	258	2e-29	103.7	0	1	1	4.5e-30	9.2e-29	101.5	0	3	255	57	307	55	309	0.86	98.062
	Phvul.009G160100.1	-	496	PK_Tyr_Ser-Thr	PF07714.22	258	7.9e-29	101.8	0	1	1	5.5e-30	1.1e-28	101.2	0	2	254	31	282	30	285	0.86	98.062
	Phvul.002G279300.1	-	505	PK_Tyr_Ser-Thr	PF07714.22	258	3.4e-28	99.7	0	1	1	2.4e-29	5e-28	99.1	0	3	255	33	284	31	286	0.89	98.062
	Phvul.004G177900.1	-	641	PK_Tyr_Ser-Thr	PF07714.22	258	3.8e-28	99.5	0	1	1	4.6e-29	9.5e-28	98.2	0	5	257	340	604	337	605	0.83	98.062
	Phvul.008G201900.1	-	521	PK_Tyr_Ser-Thr	PF07714.22	258	7.7e-28	98.5	0	1	1	6.7e-29	1.4e-27	97.7	0	3	255	68	319	66	321	0.8	98.062
	Phvul.008G258700.1	-	691	PK_Tyr_Ser-Thr	PF07714.22	258	3.5e-27	96.4	0.1	1	1	4.5e-28	9.2e-27	95	0.1	6	258	404	660	400	660	0.87	98.062
	Phvul.002G294500.1	-	519	PK_Tyr_Ser-Thr	PF07714.22	258	1.2e-26	94.6	0	1	1	2.2e-27	4.5e-26	92.7	0	3	255	68	319	66	321	0.84	98.062
	Phvul.L001678.1	-	270	PK_Tyr_Ser-Thr	PF07714.22	258	1.4e-26	94.4	0	1	1	8.9e-28	1.8e-26	94	0	3	255	11	258	9	260	0.85	98.062
	Phvul.007G253300.1	-	516	PK_Tyr_Ser-Thr	PF07714.22	258	4.9e-26	92.6	0	1	1	3.6e-27	7.5e-26	92	0	3	255	45	296	43	298	0.86	98.062
	Phvul.007G265100.1	-	582	PK_Tyr_Ser-Thr	PF07714.22	258	8e-26	91.9	0	1	1	6.6e-27	1.4e-25	91.1	0	2	254	137	388	136	391	0.9	98.062
	Phvul.006G181600.1	-	334	PK_Tyr_Ser-Thr	PF07714.22	258	1.6e-25	90.9	0	1	1	1.2e-26	2.5e-25	90.3	0	4	256	66	323	63	325	0.8	98.062
	Phvul.002G232700.1	-	332	PK_Tyr_Ser-Thr	PF07714.22	258	2.7e-25	90.1	0	1	1	4e-26	8.3e-25	88.6	0	4	256	65	321	62	323	0.84	98.062
	Phvul.006G071600.1	-	678	PK_Tyr_Ser-Thr	PF07714.22	258	4.5e-25	89.4	0	1	1	3.2e-26	6.6e-25	88.9	0	6	258	387	642	383	642	0.86	98.062
	Phvul.007G233900.1	-	581	PK_Tyr_Ser-Thr	PF07714.22	258	1.1e-24	88.2	0	1	1	8.4e-26	1.7e-24	87.5	0	2	254	119	370	118	373	0.87	98.062
	Phvul.003G129400.1	-	608	PK_Tyr_Ser-Thr	PF07714.22	258	3.4e-24	86.6	0	1	1	2.4e-25	5e-24	86	0	4	256	335	601	333	603	0.87	98.062
	Phvul.009G225700.1	-	605	PK_Tyr_Ser-Thr	PF07714.22	258	4.7e-24	86.1	0	1	1	3.6e-25	7.4e-24	85.4	0	5	257	334	599	331	600	0.85	98.062
	Phvul.008G098400.1	-	531	PK_Tyr_Ser-Thr	PF07714.22	258	5.6e-24	85.9	0	1	1	4.2e-25	8.7e-24	85.2	0	4	256	60	311	58	312	0.82	98.062
	Phvul.005G063700.1	-	674	PK_Tyr_Ser-Thr	PF07714.22	258	6.4e-24	85.7	0	1	1	5.3e-25	1.1e-23	84.9	0	2	254	28	289	27	293	0.82	98.062
	Phvul.005G063700.2	-	673	PK_Tyr_Ser-Thr	PF07714.22	258	6.4e-24	85.7	0	1	1	5.3e-25	1.1e-23	84.9	0	2	254	28	289	27	293	0.81	98.062
	Phvul.008G292500.1	-	562	PK_Tyr_Ser-Thr	PF07714.22	258	1.3e-23	84.7	0	1	1	9.1e-25	1.9e-23	84.1	0	2	254	100	351	99	354	0.87	98.062
	Phvul.001G204900.1	-	495	PK_Tyr_Ser-Thr	PF07714.22	258	2.3e-21	77.3	0	1	1	1.6e-22	3.3e-21	76.8	0	4	256	243	480	240	481	0.75	98.062
	Phvul.004G055400.1	-	760	PK_Tyr_Ser-Thr	PF07714.22	258	3.3e-19	70.2	0	1	1	7.6e-20	1.6e-18	68	0	3	255	480	740	478	743	0.77	98.062
	Phvul.002G156600.1	-	663	PK_Tyr_Ser-Thr	PF07714.22	258	1.2e-18	68.4	0	1	1	1e-19	2.1e-18	67.6	0	5	257	368	636	365	637	0.79	98.062
	Phvul.001G073501.2	-	422	PK_Tyr_Ser-Thr	PF07714.22	258	8.4e-16	59.1	0	1	1	5.3e-17	1.1e-15	58.7	0	2	254	10	269	9	273	0.79	97.6744
	Phvul.004G154500.1	-	635	PK_Tyr_Ser-Thr	PF07714.22	258	9.9e-81	271.8	0.3	2	2	5.8e-48	1.2e-46	160.2	0	4	255	353	618	351	621	0.96	97.6744
	Phvul.011G164700.2	-	697	PK_Tyr_Ser-Thr	PF07714.22	258	9.3e-52	176.9	0	1	1	6.9e-53	1.4e-51	176.3	0	5	256	19	263	15	265	0.96	97.6744
	Phvul.011G164700.3	-	697	PK_Tyr_Ser-Thr	PF07714.22	258	9.3e-52	176.9	0	1	1	6.9e-53	1.4e-51	176.3	0	5	256	19	263	15	265	0.96	97.6744
	Phvul.011G164700.1	-	698	PK_Tyr_Ser-Thr	PF07714.22	258	9.3e-52	176.9	0	1	1	6.9e-53	1.4e-51	176.3	0	5	256	19	263	15	265	0.96	97.6744
	Phvul.011G164700.4	-	698	PK_Tyr_Ser-Thr	PF07714.22	258	9.3e-52	176.9	0	1	1	6.9e-53	1.4e-51	176.3	0	5	256	19	263	15	265	0.94	97.6744
	Phvul.007G050600.1	-	661	PK_Tyr_Ser-Thr	PF07714.22	258	1.6e-51	176.1	0	1	1	1e-52	2.1e-51	175.7	0	4	255	334	599	331	602	0.82	97.6744
	Phvul.005G015100.1	-	660	PK_Tyr_Ser-Thr	PF07714.22	258	8.9e-51	173.7	0	1	1	9.3e-52	1.9e-50	172.6	0	5	256	346	611	343	613	0.9	97.6744
	Phvul.011G175700.1	-	771	PK_Tyr_Ser-Thr	PF07714.22	258	1.4e-50	173.1	0	1	1	1.1e-51	2.2e-50	172.4	0	4	255	471	737	468	740	0.93	97.6744
	Phvul.001G130800.1	-	756	PK_Tyr_Ser-Thr	PF07714.22	258	1.8e-50	172.6	0	1	1	1.5e-51	3.2e-50	171.9	0	7	258	432	696	427	696	0.89	97.6744
	Phvul.008G030700.1	-	858	PK_Tyr_Ser-Thr	PF07714.22	258	1.8e-50	172.6	0	1	1	1.9e-51	3.8e-50	171.6	0	5	256	520	785	516	787	0.93	97.6744
	Phvul.001G130800.2	-	729	PK_Tyr_Ser-Thr	PF07714.22	258	1.9e-50	172.6	0	1	1	1.4e-51	2.9e-50	172	0	7	258	405	669	400	669	0.9	97.6744
	Phvul.011G175700.2	-	770	PK_Tyr_Ser-Thr	PF07714.22	258	2.1e-50	172.5	0	1	1	1.6e-51	3.3e-50	171.8	0	4	255	471	736	468	739	0.83	97.6744
	Phvul.005G088800.1	-	736	PK_Tyr_Ser-Thr	PF07714.22	258	3.1e-50	171.9	0	1	1	2.6e-51	5.4e-50	171.1	0	2	253	421	686	420	691	0.85	97.6744
	Phvul.005G079100.1	-	1010	PK_Tyr_Ser-Thr	PF07714.22	258	3.4e-50	171.8	0	1	1	2.8e-51	5.8e-50	171	0	5	256	673	938	669	940	0.92	97.6744
	Phvul.010G145100.1	-	664	PK_Tyr_Ser-Thr	PF07714.22	258	8.4e-50	170.5	0	1	1	7.9e-51	1.6e-49	169.5	0	5	256	358	634	355	636	0.93	97.6744
	Phvul.001G066400.1	-	751	PK_Tyr_Ser-Thr	PF07714.22	258	1.5e-49	169.7	0	1	1	1.2e-50	2.6e-49	168.9	0	7	258	426	690	420	690	0.84	97.6744
	Phvul.011G196200.1	-	671	PK_Tyr_Ser-Thr	PF07714.22	258	1.9e-49	169.3	0	1	1	2.1e-50	4.4e-49	168.1	0	5	256	357	622	353	624	0.9	97.6744
	Phvul.008G292000.2	-	416	PK_Tyr_Ser-Thr	PF07714.22	258	2.1e-49	169.2	0	1	1	1.6e-50	3.3e-49	168.5	0	6	257	100	371	96	372	0.9	97.6744
	Phvul.007G050300.2	-	352	PK_Tyr_Ser-Thr	PF07714.22	258	2.4e-49	169	0	1	1	1.7e-50	3.5e-49	168.5	0	5	256	47	311	43	313	0.9	97.6744
	Phvul.006G211800.1	-	454	PK_Tyr_Ser-Thr	PF07714.22	258	3.8e-49	168.3	0	1	1	2.4e-50	5e-49	168	0	4	255	184	429	181	431	0.87	97.6744
	Phvul.007G049400.1	-	672	PK_Tyr_Ser-Thr	PF07714.22	258	3.9e-49	168.3	0	1	1	3.3e-50	6.7e-49	167.5	0	4	255	348	612	345	615	0.93	97.6744
	Phvul.001G066200.1	-	730	PK_Tyr_Ser-Thr	PF07714.22	258	5.5e-49	167.8	0	1	1	4.1e-50	8.4e-49	167.2	0	7	258	405	669	400	669	0.93	97.6744
	Phvul.002G049400.2	-	667	PK_Tyr_Ser-Thr	PF07714.22	258	6.8e-49	167.5	0	1	1	5.7e-50	1.2e-48	166.7	0	4	255	355	620	352	623	0.84	97.6744
	Phvul.007G051500.1	-	667	PK_Tyr_Ser-Thr	PF07714.22	258	8e-49	167.3	0	1	1	9.1e-50	1.9e-48	166.1	0	4	255	351	616	348	619	0.91	97.6744
	Phvul.008G292000.1	-	426	PK_Tyr_Ser-Thr	PF07714.22	258	8.6e-49	167.2	0	1	1	6.5e-50	1.3e-48	166.5	0	6	257	100	381	96	382	0.89	97.6744
	Phvul.003G239500.1	-	861	PK_Tyr_Ser-Thr	PF07714.22	258	1e-48	166.9	0	1	1	8.7e-50	1.8e-48	166.1	0	4	255	521	785	518	788	0.91	97.6744
	Phvul.002G202400.1	-	499	PK_Tyr_Ser-Thr	PF07714.22	258	1.5e-48	166.3	0	1	1	9.9e-50	2e-48	165.9	0	4	255	228	474	225	476	0.85	97.6744
	Phvul.002G220200.1	-	843	PK_Tyr_Ser-Thr	PF07714.22	258	2.7e-48	165.5	0	1	1	2.9e-49	6e-48	164.4	0	4	255	527	792	524	795	0.89	97.6744
	Phvul.003G239400.2	-	862	PK_Tyr_Ser-Thr	PF07714.22	258	3e-48	165.4	0	1	1	2.4e-49	4.9e-48	164.7	0	4	255	522	786	519	789	0.87	97.6744
	Phvul.002G272100.2	-	592	PK_Tyr_Ser-Thr	PF07714.22	258	5e-48	164.7	0	1	1	3.4e-49	6.9e-48	164.2	0	4	255	204	452	201	454	0.87	97.6744
	Phvul.002G272100.1	-	608	PK_Tyr_Ser-Thr	PF07714.22	258	5.4e-48	164.6	0	1	1	3.6e-49	7.4e-48	164.1	0	4	255	204	452	201	454	0.89	97.6744
	Phvul.005G077600.1	-	614	PK_Tyr_Ser-Thr	PF07714.22	258	5.8e-48	164.4	0	1	1	4.6e-49	9.4e-48	163.8	0	5	256	278	543	274	545	0.92	97.6744
	Phvul.007G050700.1	-	659	PK_Tyr_Ser-Thr	PF07714.22	258	9.9e-48	163.7	0	1	1	7.4e-49	1.5e-47	163.1	0	4	255	333	597	330	600	0.91	97.6744
	Phvul.002G124700.1	-	419	PK_Tyr_Ser-Thr	PF07714.22	258	1.1e-47	163.6	0	1	1	1.1e-48	2.4e-47	162.5	0	7	258	96	366	91	366	0.83	97.6744
	Phvul.011G193200.1	-	629	PK_Tyr_Ser-Thr	PF07714.22	258	1.3e-47	163.3	0	1	1	1.1e-48	2.2e-47	162.5	0	4	255	317	582	314	585	0.83	97.6744
	Phvul.002G219900.1	-	837	PK_Tyr_Ser-Thr	PF07714.22	258	1.3e-47	163.3	0	1	1	9.9e-49	2e-47	162.7	0	4	255	523	788	520	791	0.89	97.6744
	Phvul.011G063900.1	-	439	PK_Tyr_Ser-Thr	PF07714.22	258	1.7e-47	162.9	0	1	1	1.8e-48	3.8e-47	161.8	0	7	258	91	360	86	360	0.92	97.6744
	Phvul.010G100700.1	-	437	PK_Tyr_Ser-Thr	PF07714.22	258	3.1e-47	162.1	0	1	1	2e-48	4.2e-47	161.6	0	6	257	136	405	132	406	0.92	97.6744
	Phvul.009G239901.1	-	343	PK_Tyr_Ser-Thr	PF07714.22	258	5.3e-47	161.3	0	1	1	3.8e-48	7.9e-47	160.7	0	7	258	36	300	31	300	0.87	97.6744
	Phvul.007G049100.1	-	673	PK_Tyr_Ser-Thr	PF07714.22	258	7.9e-47	160.7	0	1	1	6e-48	1.2e-46	160.1	0	4	255	344	608	341	611	0.93	97.6744
	Phvul.009G131900.1	-	750	PK_Tyr_Ser-Thr	PF07714.22	258	1e-46	160.4	0	1	1	7.4e-48	1.5e-46	159.8	0	5	256	423	687	419	689	0.88	97.6744
	Phvul.007G048800.1	-	670	PK_Tyr_Ser-Thr	PF07714.22	258	1.2e-46	160.1	0	1	1	1e-47	2.2e-46	159.3	0	5	256	342	606	338	608	0.85	97.6744
	Phvul.011G194200.2	-	475	PK_Tyr_Ser-Thr	PF07714.22	258	1.3e-46	160	0	1	1	1.9e-47	3.9e-46	158.5	0	5	256	161	426	157	428	0.9	97.6744
	Phvul.003G246500.4	-	633	PK_Tyr_Ser-Thr	PF07714.22	258	2.4e-46	159.1	0	1	1	1.7e-47	3.5e-46	158.6	0	4	255	308	558	305	560	0.9	97.6744
	Phvul.003G246500.3	-	634	PK_Tyr_Ser-Thr	PF07714.22	258	2.4e-46	159.1	0	1	1	1.7e-47	3.6e-46	158.6	0	4	255	308	558	305	560	0.92	97.6744
	Phvul.009G011600.1	-	375	PK_Tyr_Ser-Thr	PF07714.22	258	2.8e-46	158.9	0	1	1	2.2e-47	4.4e-46	158.3	0	5	256	76	343	72	345	0.92	97.6744
	Phvul.002G302300.1	-	379	PK_Tyr_Ser-Thr	PF07714.22	258	3.3e-46	158.7	0	1	1	3.6e-47	7.5e-46	157.5	0	7	258	71	342	67	342	0.86	97.6744
	Phvul.007G048900.1	-	671	PK_Tyr_Ser-Thr	PF07714.22	258	3.6e-46	158.6	0	1	1	2.9e-47	6.1e-46	157.8	0	4	255	342	606	339	609	0.9	97.6744
	Phvul.001G178400.1	-	425	PK_Tyr_Ser-Thr	PF07714.22	258	4.1e-46	158.4	0	1	1	3.2e-47	6.7e-46	157.7	0	5	256	88	363	84	365	0.9	97.6744
	Phvul.001G178400.2	-	425	PK_Tyr_Ser-Thr	PF07714.22	258	4.1e-46	158.4	0	1	1	3.2e-47	6.7e-46	157.7	0	5	256	88	363	84	365	0.86	97.6744
	Phvul.006G039500.1	-	391	PK_Tyr_Ser-Thr	PF07714.22	258	4.5e-46	158.3	0	1	1	3.7e-47	7.6e-46	157.5	0	5	256	91	359	87	361	0.89	97.6744
	Phvul.006G194600.1	-	841	PK_Tyr_Ser-Thr	PF07714.22	258	6.9e-46	157.6	0	1	1	5.2e-47	1.1e-45	157	0	4	255	525	790	522	793	0.82	97.6744
	Phvul.011G194401.2	-	666	PK_Tyr_Ser-Thr	PF07714.22	258	7.1e-46	157.6	0	1	1	1e-46	2.1e-45	156	0	5	256	354	618	350	620	0.82	97.6744
	Phvul.011G194401.1	-	667	PK_Tyr_Ser-Thr	PF07714.22	258	7.1e-46	157.6	0	1	1	1e-46	2.1e-45	156	0	5	256	355	619	351	621	0.82	97.6744
	Phvul.007G162300.1	-	382	PK_Tyr_Ser-Thr	PF07714.22	258	1.5e-45	156.5	0	1	1	1.5e-46	3e-45	155.5	0	5	256	81	349	77	351	0.9	97.6744
	Phvul.010G015100.4	-	655	PK_Tyr_Ser-Thr	PF07714.22	258	1.6e-45	156.5	0	1	1	1.2e-46	2.4e-45	155.9	0	3	254	16	265	14	268	0.9	97.6744
	Phvul.010G015100.3	-	717	PK_Tyr_Ser-Thr	PF07714.22	258	1.9e-45	156.2	0	1	1	1.4e-46	2.9e-45	155.6	0	3	254	16	265	14	268	0.9	97.6744
	Phvul.010G015100.2	-	733	PK_Tyr_Ser-Thr	PF07714.22	258	2e-45	156.1	0	1	1	1.5e-46	3e-45	155.5	0	3	254	16	265	14	268	0.9	97.6744
	Phvul.003G246500.6	-	600	PK_Tyr_Ser-Thr	PF07714.22	258	2.4e-45	155.9	0	1	1	1.7e-46	3.5e-45	155.3	0	4	255	272	525	269	527	0.9	97.6744
	Phvul.003G246500.5	-	601	PK_Tyr_Ser-Thr	PF07714.22	258	2.4e-45	155.9	0	1	1	1.7e-46	3.5e-45	155.3	0	4	255	272	525	269	527	0.9	97.6744
	Phvul.003G246500.2	-	636	PK_Tyr_Ser-Thr	PF07714.22	258	2.7e-45	155.7	0	1	1	1.9e-46	4e-45	155.2	0	4	255	308	561	305	563	0.9	97.6744
	Phvul.003G246500.1	-	637	PK_Tyr_Ser-Thr	PF07714.22	258	2.7e-45	155.7	0	1	1	1.9e-46	4e-45	155.2	0	4	255	308	561	305	563	0.81	97.6744
	Phvul.011G008100.1	-	941	PK_Tyr_Ser-Thr	PF07714.22	258	4.1e-45	155.1	0	1	1	3e-46	6.1e-45	154.5	0	6	257	670	933	665	934	0.87	97.6744
	Phvul.011G150400.1	-	818	PK_Tyr_Ser-Thr	PF07714.22	258	6.6e-45	154.4	0	1	1	6.1e-46	1.3e-44	153.5	0	4	255	504	769	501	772	0.78	97.6744
	Phvul.003G158700.1	-	768	PK_Tyr_Ser-Thr	PF07714.22	258	6.9e-45	154.4	0	1	1	6.5e-46	1.3e-44	153.4	0	3	254	452	717	450	721	0.85	97.6744
	Phvul.005G162100.1	-	892	PK_Tyr_Ser-Thr	PF07714.22	258	9e-45	154	0	1	1	8.4e-46	1.7e-44	153.1	0	3	254	589	852	587	856	0.87	97.6744
	Phvul.007G049500.1	-	669	PK_Tyr_Ser-Thr	PF07714.22	258	1.1e-44	153.7	0	1	1	8e-46	1.6e-44	153.1	0	4	255	340	604	337	607	0.85	97.6744
	Phvul.005G110900.2	-	985	PK_Tyr_Ser-Thr	PF07714.22	258	1.2e-44	153.6	0	1	1	9.9e-46	2e-44	152.8	0	4	255	672	937	669	940	0.85	97.6744
	Phvul.005G110900.1	-	984	PK_Tyr_Ser-Thr	PF07714.22	258	1.2e-44	153.6	0	1	1	9.9e-46	2e-44	152.8	0	4	255	671	936	668	939	0.9	97.6744
	Phvul.002G021100.5	-	606	PK_Tyr_Ser-Thr	PF07714.22	258	1.8e-44	153	0	1	1	1.2e-45	2.5e-44	152.5	0	4	255	345	598	342	600	0.9	97.6744
	Phvul.002G021100.6	-	606	PK_Tyr_Ser-Thr	PF07714.22	258	1.8e-44	153	0	1	1	1.2e-45	2.5e-44	152.5	0	4	255	345	598	342	600	0.89	97.6744
	Phvul.004G011000.1	-	670	PK_Tyr_Ser-Thr	PF07714.22	258	1.8e-44	153	0	1	1	1.2e-45	2.6e-44	152.5	0	5	256	336	598	332	600	0.87	97.6744
	Phvul.007G049000.2	-	649	PK_Tyr_Ser-Thr	PF07714.22	258	1.9e-44	152.9	0	1	1	1.4e-45	2.9e-44	152.3	0	4	255	320	584	317	587	0.87	97.6744
	Phvul.007G049000.1	-	685	PK_Tyr_Ser-Thr	PF07714.22	258	2.1e-44	152.8	0	1	1	1.6e-45	3.3e-44	152.1	0	4	255	356	620	353	623	0.9	97.6744
	Phvul.004G164000.1	-	663	PK_Tyr_Ser-Thr	PF07714.22	258	6.6e-44	151.2	0	1	1	5.2e-45	1.1e-43	150.5	0	6	257	295	562	291	563	0.84	97.6744
	Phvul.011G041400.1	-	981	PK_Tyr_Ser-Thr	PF07714.22	258	7.9e-44	150.9	0	1	1	7.1e-45	1.5e-43	150	0	4	255	668	933	665	936	0.81	97.6744
	Phvul.005G162400.1	-	883	PK_Tyr_Ser-Thr	PF07714.22	258	3.5e-43	148.8	0	1	1	3.2e-44	6.5e-43	147.9	0	3	254	576	839	574	843	0.85	97.6744
	Phvul.005G005900.1	-	1229	PK_Tyr_Ser-Thr	PF07714.22	258	7.7e-43	147.7	0	1	1	5.4e-44	1.1e-42	147.1	0	4	255	933	1201	930	1204	0.87	97.6744
	Phvul.005G153100.1	-	906	PK_Tyr_Ser-Thr	PF07714.22	258	9.7e-42	144.1	0	1	1	7.2e-43	1.5e-41	143.4	0	4	255	516	782	513	785	0.91	97.6744
	Phvul.004G126100.1	-	989	PK_Tyr_Ser-Thr	PF07714.22	258	1.4e-41	143.5	0	1	1	9.4e-43	1.9e-41	143.1	0	6	257	665	925	660	926	0.87	97.6744
	Phvul.009G224500.1	-	545	PK_Tyr_Ser-Thr	PF07714.22	258	4.7e-41	141.8	0.1	1	1	9.2e-42	1.9e-40	139.8	0	7	258	265	536	260	536	0.86	97.6744
	Phvul.006G159100.1	-	498	PK_Tyr_Ser-Thr	PF07714.22	258	5.6e-41	141.6	0	1	1	4.2e-42	8.7e-41	140.9	0	5	256	180	439	176	441	0.92	97.6744
	Phvul.007G063200.2	-	944	PK_Tyr_Ser-Thr	PF07714.22	258	1.4e-40	140.3	0	1	1	8.8e-42	1.8e-40	139.9	0	6	257	622	881	617	882	0.92	97.6744
	Phvul.007G063200.1	-	989	PK_Tyr_Ser-Thr	PF07714.22	258	1.5e-40	140.2	0	1	1	9.6e-42	2e-40	139.8	0	6	257	667	926	662	927	0.87	97.6744
	Phvul.001G018000.2	-	733	PK_Tyr_Ser-Thr	PF07714.22	258	4.6e-40	138.6	0	1	1	5.4e-41	1.1e-39	137.3	0	6	257	416	688	411	689	0.92	97.6744
	Phvul.006G160500.1	-	1369	PK_Tyr_Ser-Thr	PF07714.22	258	5.1e-40	138.4	0	1	1	4.2e-41	8.6e-40	137.7	0	3	254	6	251	4	254	0.86	97.6744
	Phvul.005G185701.1	-	508	PK_Tyr_Ser-Thr	PF07714.22	258	2.4e-39	136.2	0	1	1	3.1e-40	6.4e-39	134.8	0	4	255	184	439	181	441	0.89	97.6744
	Phvul.009G082532.1	-	386	PK_Tyr_Ser-Thr	PF07714.22	258	2.6e-39	136.1	0	1	1	1.6e-40	3.4e-39	135.7	0	6	257	58	318	53	319	0.9	97.6744
	Phvul.001G038400.1	-	979	PK_Tyr_Ser-Thr	PF07714.22	258	1.5e-38	133.6	0	1	1	9.9e-40	2e-38	133.2	0	6	257	651	911	646	912	0.9	97.6744
	Phvul.008G245900.1	-	655	PK_Tyr_Ser-Thr	PF07714.22	258	8.2e-38	131.2	0	1	1	5.7e-39	1.2e-37	130.7	0	5	256	363	625	360	627	0.9	97.6744
	Phvul.008G245900.2	-	655	PK_Tyr_Ser-Thr	PF07714.22	258	8.2e-38	131.2	0	1	1	5.7e-39	1.2e-37	130.7	0	5	256	363	625	360	627	0.88	97.6744
	Phvul.004G147800.1	-	317	PK_Tyr_Ser-Thr	PF07714.22	258	1.5e-37	130.3	0	1	1	9.1e-39	1.9e-37	130	0	4	255	51	305	48	307	0.9	97.6744
	Phvul.004G174500.1	-	354	PK_Tyr_Ser-Thr	PF07714.22	258	4.5e-37	128.8	0	1	1	2.7e-38	5.5e-37	128.5	0	2	253	70	322	69	326	0.9	97.6744
	Phvul.006G080200.1	-	657	PK_Tyr_Ser-Thr	PF07714.22	258	1.1e-35	124.3	0	1	1	7.7e-37	1.6e-35	123.7	0	5	256	366	628	363	630	0.86	97.6744
	Phvul.008G286300.1	-	297	PK_Tyr_Ser-Thr	PF07714.22	258	1.4e-35	123.9	0	1	1	8.6e-37	1.8e-35	123.5	0	5	256	30	280	27	281	0.95	97.6744
	Phvul.011G013100.1	-	503	PK_Tyr_Ser-Thr	PF07714.22	258	2.3e-35	123.2	0	1	1	1.5e-36	3.2e-35	122.7	0	5	256	59	332	55	334	0.86	97.6744
	Phvul.007G224300.1	-	682	PK_Tyr_Ser-Thr	PF07714.22	258	3.6e-34	119.3	0	1	1	3.6e-35	7.4e-34	118.2	0	5	256	374	647	371	649	0.84	97.6744
	Phvul.001G185400.1	-	677	PK_Tyr_Ser-Thr	PF07714.22	258	1.8e-33	117	0	1	1	2.7e-34	5.5e-33	115.4	0	5	256	368	640	365	642	0.88	97.6744
	Phvul.009G042300.1	-	640	PK_Tyr_Ser-Thr	PF07714.22	258	2.3e-33	116.6	0	1	1	1.7e-34	3.5e-33	116	0	5	256	353	615	350	617	0.88	97.6744
	Phvul.009G042300.2	-	640	PK_Tyr_Ser-Thr	PF07714.22	258	2.3e-33	116.6	0	1	1	1.7e-34	3.5e-33	116	0	5	256	353	615	350	617	0.86	97.6744
	Phvul.008G160700.1	-	623	PK_Tyr_Ser-Thr	PF07714.22	258	3.1e-33	116.2	0	1	1	3.5e-34	7.3e-33	115	0	5	256	326	584	323	586	0.86	97.6744
	Phvul.008G160700.2	-	623	PK_Tyr_Ser-Thr	PF07714.22	258	3.1e-33	116.2	0	1	1	3.5e-34	7.3e-33	115	0	5	256	326	584	323	586	0.84	97.6744
	Phvul.005G135922.1	-	409	PK_Tyr_Ser-Thr	PF07714.22	258	1e-32	114.5	0	1	1	6.9e-34	1.4e-32	114	0	5	256	121	374	118	376	0.84	97.6744
	Phvul.005G135922.2	-	409	PK_Tyr_Ser-Thr	PF07714.22	258	1e-32	114.5	0	1	1	6.9e-34	1.4e-32	114	0	5	256	121	374	118	376	0.87	97.6744
	Phvul.011G102000.1	-	354	PK_Tyr_Ser-Thr	PF07714.22	258	1.1e-32	114.4	0	1	1	6.8e-34	1.4e-32	114	0	5	256	7	249	3	250	0.87	97.6744
	Phvul.003G225800.1	-	338	PK_Tyr_Ser-Thr	PF07714.22	258	1.5e-32	113.9	0	1	1	1.1e-33	2.4e-32	113.3	0	5	256	9	257	5	258	0.87	97.6744
	Phvul.009G195900.1	-	855	PK_Tyr_Ser-Thr	PF07714.22	258	3e-32	113	0	1	1	4e-33	8.3e-32	111.5	0	5	256	551	845	547	847	0.9	97.6744
	Phvul.007G279600.1	-	422	PK_Tyr_Ser-Thr	PF07714.22	258	4e-32	112.5	0	1	1	2.7e-33	5.6e-32	112.1	0	3	254	16	263	14	266	0.87	97.6744
	Phvul.009G050100.1	-	593	PK_Tyr_Ser-Thr	PF07714.22	258	5.3e-32	112.1	0	1	1	4.5e-33	9.2e-32	111.4	0	2	253	140	394	139	398	0.82	97.6744
	Phvul.L001750.1	-	564	PK_Tyr_Ser-Thr	PF07714.22	258	1.4e-31	110.8	0	1	1	2.8e-32	5.8e-31	108.7	0	5	256	70	336	66	338	0.84	97.6744
	Phvul.008G248200.1	-	608	PK_Tyr_Ser-Thr	PF07714.22	258	1.5e-31	110.7	0	1	1	1.3e-32	2.6e-31	109.9	0	3	254	18	268	17	271	0.89	97.6744
	Phvul.003G156366.1	-	855	PK_Tyr_Ser-Thr	PF07714.22	258	3e-31	109.7	0	1	1	2.2e-32	4.6e-31	109.1	0	5	256	553	845	549	847	0.89	97.6744
	Phvul.006G069600.1	-	444	PK_Tyr_Ser-Thr	PF07714.22	258	4.9e-31	109	0	1	1	4.6e-32	9.5e-31	108	0	5	256	9	255	6	256	0.87	97.6744
	Phvul.001G003300.1	-	380	PK_Tyr_Ser-Thr	PF07714.22	258	1.4e-30	107.5	0	1	1	9.2e-32	1.9e-30	107.1	0	2	253	74	324	73	328	0.82	97.6744
	Phvul.010G064900.1	-	713	PK_Tyr_Ser-Thr	PF07714.22	258	2.9e-30	106.4	0	1	1	4.6e-31	9.4e-30	104.8	0	7	258	422	708	418	708	0.83	97.6744
	Phvul.008G093000.1	-	707	PK_Tyr_Ser-Thr	PF07714.22	258	5e-30	105.7	0	1	1	8.4e-31	1.7e-29	103.9	0	7	258	416	702	412	702	0.87	97.6744
	Phvul.001G002800.4	-	521	PK_Tyr_Ser-Thr	PF07714.22	258	1.5e-29	104.1	0.3	1	1	1.4e-30	3e-29	103.1	0	2	253	71	321	70	325	0.85	97.6744
	Phvul.003G241400.1	-	634	PK_Tyr_Ser-Thr	PF07714.22	258	1.8e-29	103.9	0	1	1	1.5e-30	3.1e-29	103.1	0	5	256	364	614	361	616	0.79	97.6744
	Phvul.001G138500.1	-	653	PK_Tyr_Ser-Thr	PF07714.22	258	1.2e-28	101.2	0	1	1	6.3e-29	1.3e-27	97.8	0	7	258	346	640	342	640	0.83	97.6744
	Phvul.005G185800.1	-	694	PK_Tyr_Ser-Thr	PF07714.22	258	1.3e-28	101.1	0	1	1	1e-29	2.1e-28	100.4	0	5	256	397	662	393	664	0.87	97.6744
	Phvul.001G002800.2	-	527	PK_Tyr_Ser-Thr	PF07714.22	258	7.8e-27	95.2	0.1	1	1	8.8e-28	1.8e-26	94	0	2	253	77	327	76	331	0.87	97.6744
	Phvul.001G002800.3	-	527	PK_Tyr_Ser-Thr	PF07714.22	258	7.8e-27	95.2	0.1	1	1	8.8e-28	1.8e-26	94	0	2	253	77	327	76	331	0.87	97.6744
	Phvul.006G148000.1	-	453	PK_Tyr_Ser-Thr	PF07714.22	258	8.5e-27	95.1	0	1	1	5.4e-28	1.1e-26	94.7	0	4	255	6	243	3	245	0.89	97.6744
	Phvul.008G151806.1	-	274	PK_Tyr_Ser-Thr	PF07714.22	258	9.5e-27	94.9	0	1	1	5.3e-28	1.1e-26	94.7	0	2	253	10	257	9	261	0.84	97.6744
	Phvul.008G259700.1	-	447	PK_Tyr_Ser-Thr	PF07714.22	258	1e-26	94.8	0	1	1	7.1e-28	1.5e-26	94.3	0	5	256	8	255	5	256	0.84	97.6744
	Phvul.007G089200.1	-	491	PK_Tyr_Ser-Thr	PF07714.22	258	5.7e-25	89.1	0	1	1	3.9e-26	8.1e-25	88.6	0	3	254	26	276	24	279	0.87	97.6744
	Phvul.007G242000.1	-	298	PK_Tyr_Ser-Thr	PF07714.22	258	1.1e-24	88.1	0	1	1	6.7e-26	1.4e-24	87.9	0	4	255	7	265	4	267	0.75	97.6744
	Phvul.008G019200.2	-	405	PK_Tyr_Ser-Thr	PF07714.22	258	2.6e-22	80.4	0	1	1	2.2e-23	4.5e-22	79.6	0	6	257	129	398	124	399	0.74	97.6744
	Phvul.008G019200.1	-	406	PK_Tyr_Ser-Thr	PF07714.22	258	5e-21	76.2	0	1	1	4.2e-22	8.7e-21	75.4	0	6	257	129	399	124	400	0.84	97.6744
	Phvul.001G115100.1	-	781	PK_Tyr_Ser-Thr	PF07714.22	258	7.6e-21	75.6	0	1	1	6.1e-22	1.3e-20	74.9	0	5	256	481	748	477	750	0.84	97.6744
	Phvul.001G115100.2	-	781	PK_Tyr_Ser-Thr	PF07714.22	258	7.6e-21	75.6	0	1	1	6.1e-22	1.3e-20	74.9	0	5	256	481	748	477	750	0.77	97.6744
	Phvul.010G136500.1	-	479	PK_Tyr_Ser-Thr	PF07714.22	258	1.5e-16	61.5	0	1	1	9e-18	1.9e-16	61.2	0	2	253	10	268	9	273	0.89	97.2868
	Phvul.006G019900.1	-	1607	PK_Tyr_Ser-Thr	PF07714.22	258	5.1e-119	397.3	1.2	2	3	1.9e-40	3.9e-39	135.5	0	7	257	766	1023	760	1024	0.8	97.2868
	Phvul.008G139200.1	-	841	PK_Tyr_Ser-Thr	PF07714.22	258	2.8e-70	237.6	0	2	2	3.7e-31	7.6e-30	105.1	0	7	257	528	802	523	803	0.91	97.2868
	Phvul.009G209700.1	-	1383	PK_Tyr_Ser-Thr	PF07714.22	258	4.3e-60	204.2	0	1	1	3.1e-61	6.3e-60	203.7	0	6	256	1098	1354	1093	1356	0.91	97.2868
	Phvul.009G209700.2	-	1389	PK_Tyr_Ser-Thr	PF07714.22	258	4.3e-60	204.2	0	1	1	3.1e-61	6.4e-60	203.7	0	6	256	1104	1360	1099	1362	0.88	97.2868
	Phvul.008G030200.1	-	864	PK_Tyr_Ser-Thr	PF07714.22	258	1.2e-49	170	0	1	1	1.2e-50	2.4e-49	169	0	6	256	518	783	514	785	0.83	97.2868
	Phvul.007G050200.1	-	643	PK_Tyr_Ser-Thr	PF07714.22	258	1.1e-48	166.8	0	1	1	8.2e-50	1.7e-48	166.2	0	5	255	332	594	328	597	0.84	97.2868
	Phvul.008G058700.2	-	643	PK_Tyr_Ser-Thr	PF07714.22	258	2e-48	166	0	1	1	1.7e-49	3.5e-48	165.2	0	4	254	316	579	313	583	0.84	97.2868
	Phvul.008G058700.1	-	669	PK_Tyr_Ser-Thr	PF07714.22	258	2.2e-48	165.8	0	1	1	1.8e-49	3.8e-48	165.1	0	4	254	342	605	339	609	0.86	97.2868
	Phvul.002G220000.1	-	835	PK_Tyr_Ser-Thr	PF07714.22	258	3.8e-48	165	0	1	1	3.4e-49	7.1e-48	164.2	0	5	255	523	787	520	790	0.84	97.2868
	Phvul.007G048700.1	-	666	PK_Tyr_Ser-Thr	PF07714.22	258	1.2e-47	163.4	0	1	1	1e-48	2.1e-47	162.6	0	5	255	338	601	334	604	0.87	97.2868
	Phvul.007G149900.1	-	425	PK_Tyr_Ser-Thr	PF07714.22	258	2.6e-47	162.3	0	1	1	2.6e-48	5.4e-47	161.3	0	6	256	90	364	85	366	0.8	97.2868
	Phvul.008G058600.2	-	672	PK_Tyr_Ser-Thr	PF07714.22	258	4.2e-47	161.6	0	1	1	3.4e-48	7e-47	160.9	0	4	254	345	608	342	612	0.8	97.2868
	Phvul.008G058600.3	-	672	PK_Tyr_Ser-Thr	PF07714.22	258	4.2e-47	161.6	0	1	1	3.4e-48	7e-47	160.9	0	4	254	345	608	342	612	0.8	97.2868
	Phvul.008G058600.6	-	672	PK_Tyr_Ser-Thr	PF07714.22	258	4.2e-47	161.6	0	1	1	3.4e-48	7e-47	160.9	0	4	254	345	608	342	612	0.8	97.2868
	Phvul.008G058600.1	-	673	PK_Tyr_Ser-Thr	PF07714.22	258	4.2e-47	161.6	0	1	1	3.4e-48	7e-47	160.9	0	4	254	346	609	343	613	0.8	97.2868
	Phvul.008G058600.4	-	673	PK_Tyr_Ser-Thr	PF07714.22	258	4.2e-47	161.6	0	1	1	3.4e-48	7e-47	160.9	0	4	254	346	609	343	613	0.8	97.2868
	Phvul.008G058600.5	-	673	PK_Tyr_Ser-Thr	PF07714.22	258	4.2e-47	161.6	0	1	1	3.4e-48	7e-47	160.9	0	4	254	346	609	343	613	0.8	97.2868
	Phvul.006G102700.1	-	862	PK_Tyr_Ser-Thr	PF07714.22	258	8.2e-47	160.7	0	1	1	6.7e-48	1.4e-46	159.9	0	5	255	520	786	516	789	0.83	97.2868
	Phvul.006G127900.1	-	848	PK_Tyr_Ser-Thr	PF07714.22	258	1.2e-46	160.1	0	1	1	1.1e-47	2.2e-46	159.3	0	6	256	528	791	525	793	0.89	97.2868
	Phvul.007G082500.1	-	369	PK_Tyr_Ser-Thr	PF07714.22	258	1.5e-46	159.8	0	1	1	1.3e-47	2.6e-46	159.1	0	7	257	91	357	87	358	0.84	97.2868
	Phvul.003G038700.1	-	794	PK_Tyr_Ser-Thr	PF07714.22	258	3.5e-46	158.6	0	1	1	6.4e-47	1.3e-45	156.7	0	6	256	517	784	513	786	0.89	97.2868
	Phvul.004G039400.1	-	820	PK_Tyr_Ser-Thr	PF07714.22	258	6.6e-46	157.7	0	1	1	5e-47	1e-45	157.1	0	6	256	512	793	508	795	0.85	97.2868
	Phvul.011G150950.1	-	818	PK_Tyr_Ser-Thr	PF07714.22	258	7.3e-46	157.6	0	1	1	6.7e-47	1.4e-45	156.7	0	5	255	504	768	500	771	0.87	97.2868
	Phvul.004G039501.1	-	500	PK_Tyr_Ser-Thr	PF07714.22	258	1.1e-45	157	0	1	1	8e-47	1.7e-45	156.4	0	6	256	192	473	188	475	0.82	97.2868
	Phvul.011G007900.1	-	944	PK_Tyr_Ser-Thr	PF07714.22	258	3.1e-45	155.5	0	1	1	2.8e-46	5.8e-45	154.6	0	7	257	678	938	673	939	0.84	97.2868
	Phvul.005G013200.1	-	693	PK_Tyr_Ser-Thr	PF07714.22	258	3.6e-45	155.3	0	1	1	4.4e-46	9e-45	154	0	6	256	319	574	315	576	0.84	97.2868
	Phvul.007G049900.5	-	444	PK_Tyr_Ser-Thr	PF07714.22	258	1.4e-44	153.4	0	1	1	1.3e-45	2.7e-44	152.4	0	5	255	118	381	114	384	0.85	97.2868
	Phvul.011G191900.1	-	661	PK_Tyr_Ser-Thr	PF07714.22	258	3.7e-44	152	0	1	1	3.6e-45	7.4e-44	151	0	5	255	300	556	296	559	0.83	97.2868
	Phvul.003G101800.1	-	335	PK_Tyr_Ser-Thr	PF07714.22	258	2.6e-43	149.2	0	1	1	5.1e-44	1e-42	147.2	0	6	256	24	290	19	292	0.8	97.2868
	Phvul.003G187200.1	-	1094	PK_Tyr_Ser-Thr	PF07714.22	258	2.8e-42	145.8	0	1	1	4.4e-43	9e-42	144.2	0	4	254	804	1074	801	1078	0.84	97.2868
	Phvul.009G106200.1	-	664	PK_Tyr_Ser-Thr	PF07714.22	258	3.8e-42	145.4	0	1	1	3e-43	6.1e-42	144.7	0	5	255	313	580	309	583	0.86	97.2868
	Phvul.005G133700.1	-	600	PK_Tyr_Ser-Thr	PF07714.22	258	4.2e-42	145.2	0	1	1	4e-43	8.2e-42	144.3	0	8	258	222	494	216	494	0.91	97.2868
	Phvul.008G212900.1	-	1034	PK_Tyr_Ser-Thr	PF07714.22	258	1.2e-40	140.4	0	1	1	9.4e-42	1.9e-40	139.8	0	7	257	747	1010	742	1011	0.88	97.2868
	Phvul.009G130300.1	-	753	PK_Tyr_Ser-Thr	PF07714.22	258	2.4e-40	139.5	0	1	1	4e-41	8.2e-40	137.7	0	6	256	410	674	407	676	0.83	97.2868
	Phvul.008G213200.1	-	1023	PK_Tyr_Ser-Thr	PF07714.22	258	6e-40	138.2	0	1	1	4.4e-41	9.1e-40	137.6	0	7	257	737	1000	732	1001	0.84	97.2868
	Phvul.008G146000.1	-	951	PK_Tyr_Ser-Thr	PF07714.22	258	1.3e-39	137.1	0	1	1	8.8e-41	1.8e-39	136.6	0	7	257	669	935	664	936	0.82	97.2868
	Phvul.006G217700.1	-	374	PK_Tyr_Ser-Thr	PF07714.22	258	8.4e-39	134.4	0	1	1	6.5e-40	1.3e-38	133.8	0	5	255	20	286	16	289	0.82	97.2868
	Phvul.001G071200.1	-	608	PK_Tyr_Ser-Thr	PF07714.22	258	3.1e-38	132.6	0	1	1	2.2e-39	4.6e-38	132	0	4	254	299	561	296	565	0.85	97.2868
	Phvul.009G244600.1	-	1193	PK_Tyr_Ser-Thr	PF07714.22	258	4.7e-38	132	0	1	1	4.4e-39	9e-38	131.1	0	7	257	896	1172	892	1173	0.85	97.2868
	Phvul.010G023600.1	-	436	PK_Tyr_Ser-Thr	PF07714.22	258	3.5e-36	125.9	0	1	1	6.6e-37	1.4e-35	123.9	0	2	252	5	276	4	281	0.88	97.2868
	Phvul.003G246000.1	-	575	PK_Tyr_Ser-Thr	PF07714.22	258	1.1e-33	117.7	0	1	1	8.1e-35	1.7e-33	117.1	0	3	253	124	377	122	381	0.88	97.2868
	Phvul.003G246000.2	-	603	PK_Tyr_Ser-Thr	PF07714.22	258	1.3e-33	117.4	0	1	1	9e-35	1.9e-33	116.9	0	3	253	124	377	122	381	0.89	97.2868
	Phvul.002G020800.1	-	589	PK_Tyr_Ser-Thr	PF07714.22	258	1.7e-33	117	0	1	1	1.2e-34	2.5e-33	116.5	0	3	253	139	392	137	396	0.86	97.2868
	Phvul.007G057000.1	-	731	PK_Tyr_Ser-Thr	PF07714.22	258	2.4e-33	116.5	0	1	1	2e-34	4.1e-33	115.8	0	4	254	27	275	25	278	0.86	97.2868
	Phvul.009G034700.1	-	468	PK_Tyr_Ser-Thr	PF07714.22	258	6.2e-32	111.9	0	1	1	4.2e-33	8.6e-32	111.5	0	4	254	112	351	110	354	0.87	97.2868
	Phvul.008G084000.1	-	620	PK_Tyr_Ser-Thr	PF07714.22	258	3.1e-31	109.6	0	1	1	2.2e-32	4.5e-31	109.1	0	4	254	41	290	39	293	0.84	97.2868
	Phvul.003G261700.4	-	525	PK_Tyr_Ser-Thr	PF07714.22	258	6.8e-31	108.5	0	1	1	4.4e-32	9.2e-31	108.1	0	2	252	68	319	67	324	0.84	97.2868
	Phvul.003G261700.1	-	527	PK_Tyr_Ser-Thr	PF07714.22	258	6.9e-31	108.5	0	1	1	4.5e-32	9.2e-31	108.1	0	2	252	68	319	67	324	0.84	97.2868
	Phvul.003G261700.2	-	527	PK_Tyr_Ser-Thr	PF07714.22	258	6.9e-31	108.5	0	1	1	4.5e-32	9.2e-31	108.1	0	2	252	68	319	67	324	0.84	97.2868
	Phvul.003G261700.3	-	527	PK_Tyr_Ser-Thr	PF07714.22	258	6.9e-31	108.5	0	1	1	4.5e-32	9.2e-31	108.1	0	2	252	68	319	67	324	0.83	97.2868
	Phvul.011G078300.1	-	412	PK_Tyr_Ser-Thr	PF07714.22	258	2.3e-30	106.8	0	1	1	1.8e-31	3.8e-30	106.1	0	5	255	125	377	122	379	0.85	97.2868
	Phvul.002G018100.1	-	341	PK_Tyr_Ser-Thr	PF07714.22	258	1.7e-29	103.9	0	1	1	1.1e-30	2.2e-29	103.5	0	5	255	7	258	4	260	0.85	97.2868
	Phvul.002G108700.1	-	569	PK_Tyr_Ser-Thr	PF07714.22	258	2.8e-29	103.2	0	1	1	1.9e-30	4e-29	102.7	0	3	253	110	361	108	365	0.91	97.2868
	Phvul.002G302600.1	-	619	PK_Tyr_Ser-Thr	PF07714.22	258	3.6e-29	102.9	0	1	1	2.6e-30	5.4e-29	102.3	0	5	255	334	598	330	601	0.89	97.2868
	Phvul.006G105900.1	-	274	PK_Tyr_Ser-Thr	PF07714.22	258	4.4e-29	102.6	0	1	1	2.5e-30	5.2e-29	102.4	0	3	253	15	261	13	265	0.86	97.2868
	Phvul.003G243300.1	-	344	PK_Tyr_Ser-Thr	PF07714.22	258	7.6e-28	98.5	0	1	1	4.8e-29	9.9e-28	98.2	0	5	255	7	259	4	261	0.85	97.2868
	Phvul.001G243600.1	-	407	PK_Tyr_Ser-Thr	PF07714.22	258	1.9e-26	93.9	0	1	1	9.2e-25	1.9e-23	84.1	0	8	258	123	382	117	382	0.86	97.2868
	Phvul.003G271000.3	-	750	PK_Tyr_Ser-Thr	PF07714.22	258	4.5e-23	82.9	0	1	1	3.1e-24	6.3e-23	82.4	0	4	254	331	608	328	611	0.86	97.2868
	Phvul.003G271000.1	-	875	PK_Tyr_Ser-Thr	PF07714.22	258	6.1e-23	82.5	0	1	1	4.2e-24	8.6e-23	82	0	4	254	456	733	453	736	0.77	97.2868
	Phvul.009G121600.4	-	698	PK_Tyr_Ser-Thr	PF07714.22	258	4.6e-21	76.3	0.1	1	1	2.1e-21	4.2e-20	73.1	0.1	6	256	325	609	320	610	0.77	97.2868
	Phvul.009G121600.3	-	719	PK_Tyr_Ser-Thr	PF07714.22	258	5.1e-21	76.2	0.1	1	1	2.2e-21	4.5e-20	73	0.1	6	256	346	630	341	631	0.77	97.2868
	Phvul.009G121600.2	-	728	PK_Tyr_Ser-Thr	PF07714.22	258	5.2e-21	76.1	0.1	1	1	2.3e-21	4.6e-20	73	0.1	6	256	355	639	350	640	0.77	97.2868
	Phvul.009G121600.1	-	749	PK_Tyr_Ser-Thr	PF07714.22	258	5.7e-21	76	0.1	1	1	2.4e-21	4.9e-20	72.9	0.1	6	256	376	660	371	661	0.84	97.2868
	Phvul.002G287900.2	-	617	PK_Tyr_Ser-Thr	PF07714.22	258	7e-19	69.1	0	1	1	6.3e-20	1.3e-18	68.3	0	5	255	322	588	319	591	0.84	97.2868
	Phvul.002G287900.1	-	661	PK_Tyr_Ser-Thr	PF07714.22	258	8.3e-19	68.9	0	1	1	7.4e-20	1.5e-18	68	0	5	255	366	632	363	635	0.77	97.2868
	Phvul.001G014400.1	-	859	PK_Tyr_Ser-Thr	PF07714.22	258	5e-18	66.3	0	1	1	6e-19	1.2e-17	65.1	0	7	257	491	761	486	762	0.81	97.2868
	Phvul.011G185500.1	-	836	PK_Tyr_Ser-Thr	PF07714.22	258	7.6e-13	49.4	0	1	1	1.2e-13	2.5e-12	47.7	0	6	256	542	806	537	808	0.9	96.8992
	Phvul.002G229000.1	-	503	PK_Tyr_Ser-Thr	PF07714.22	258	4.2e-61	207.5	0	1	1	2.9e-62	6.1e-61	207	0	8	257	203	451	198	452	0.9	96.8992
	Phvul.002G229000.2	-	503	PK_Tyr_Ser-Thr	PF07714.22	258	4.2e-61	207.5	0	1	1	2.9e-62	6.1e-61	207	0	8	257	203	451	198	452	0.88	96.8992
	Phvul.008G030400.1	-	838	PK_Tyr_Ser-Thr	PF07714.22	258	2.6e-51	175.4	0	1	1	3.7e-52	7.5e-51	173.9	0	7	256	510	774	506	776	0.92	96.8992
	Phvul.004G039600.1	-	865	PK_Tyr_Ser-Thr	PF07714.22	258	2.9e-50	172	0	1	1	2.4e-51	4.9e-50	171.3	0	7	256	534	798	531	800	0.93	96.8992
	Phvul.001G066300.1	-	728	PK_Tyr_Ser-Thr	PF07714.22	258	3.8e-49	168.4	0.1	1	1	2.6e-50	5.4e-49	167.8	0.1	7	256	403	665	397	667	0.88	96.8992
	Phvul.008G030800.1	-	866	PK_Tyr_Ser-Thr	PF07714.22	258	4e-49	168.2	0	1	1	4.4e-50	9.1e-49	167.1	0	7	256	521	785	516	787	0.91	96.8992
	Phvul.004G038800.1	-	891	PK_Tyr_Ser-Thr	PF07714.22	258	2.4e-48	165.7	0	1	1	1.9e-49	4e-48	165	0	7	256	538	802	534	804	0.9	96.8992
	Phvul.006G212500.1	-	396	PK_Tyr_Ser-Thr	PF07714.22	258	5e-48	164.7	0	1	1	3.5e-49	7.1e-48	164.2	0	6	255	123	366	119	368	0.83	96.8992
	Phvul.005G078400.2	-	1026	PK_Tyr_Ser-Thr	PF07714.22	258	1.1e-47	163.6	0	1	1	7.7e-49	1.6e-47	163	0	3	252	689	952	687	958	0.83	96.8992
	Phvul.005G078400.1	-	1030	PK_Tyr_Ser-Thr	PF07714.22	258	1.1e-47	163.5	0	1	1	7.7e-49	1.6e-47	163	0	3	252	693	956	691	962	0.88	96.8992
	Phvul.011G148700.1	-	845	PK_Tyr_Ser-Thr	PF07714.22	258	1.7e-47	162.9	0	1	1	1.2e-48	2.5e-47	162.4	0	6	255	509	771	504	774	0.87	96.8992
	Phvul.009G062400.1	-	679	PK_Tyr_Ser-Thr	PF07714.22	258	1.7e-46	159.6	0	1	1	1.3e-47	2.6e-46	159	0	4	253	299	550	296	554	0.82	96.8992
	Phvul.008G047800.1	-	1063	PK_Tyr_Ser-Thr	PF07714.22	258	3.8e-40	138.8	0	1	1	2.7e-41	5.7e-40	138.3	0	7	256	777	1041	772	1043	0.9	96.8992
	Phvul.010G134200.1	-	716	PK_Tyr_Ser-Thr	PF07714.22	258	1.5e-39	136.9	0	1	1	4.3e-40	8.9e-39	134.4	0	6	255	438	692	433	694	0.87	96.8992
	Phvul.008G028300.1	-	348	PK_Tyr_Ser-Thr	PF07714.22	258	3.3e-38	132.5	0	1	1	2.1e-39	4.3e-38	132.1	0	3	252	49	302	47	308	0.83	96.8992
	Phvul.005G183300.1	-	945	PK_Tyr_Ser-Thr	PF07714.22	258	4.3e-38	132.1	0	1	1	3.8e-39	7.8e-38	131.3	0	4	253	631	909	628	914	0.88	96.8992
	Phvul.008G081400.1	-	475	PK_Tyr_Ser-Thr	PF07714.22	258	1e-36	127.6	0	1	1	6.6e-38	1.4e-36	127.2	0	2	251	147	388	146	390	0.88	96.8992
	Phvul.005G115900.1	-	399	PK_Tyr_Ser-Thr	PF07714.22	258	3e-36	126	0	1	1	2e-37	4.1e-36	125.6	0	7	256	9	252	4	253	0.84	96.8992
	Phvul.011G166400.1	-	1043	PK_Tyr_Ser-Thr	PF07714.22	258	3.8e-36	125.7	0	1	1	4.9e-37	1e-35	124.3	0	5	254	774	1042	770	1043	0.87	96.8992
	Phvul.009G173100.1	-	596	PK_Tyr_Ser-Thr	PF07714.22	258	4.9e-36	125.4	0.1	1	1	3.5e-37	7.1e-36	124.8	0.1	4	253	30	278	28	282	0.87	96.8992
	Phvul.009G173100.2	-	596	PK_Tyr_Ser-Thr	PF07714.22	258	4.9e-36	125.4	0.1	1	1	3.5e-37	7.1e-36	124.8	0.1	4	253	30	278	28	282	0.84	96.8992
	Phvul.010G165000.1	-	776	PK_Tyr_Ser-Thr	PF07714.22	258	8.2e-36	124.6	0	1	1	9e-37	1.9e-35	123.5	0	4	253	463	725	460	729	0.88	96.8992
	Phvul.004G147900.1	-	322	PK_Tyr_Ser-Thr	PF07714.22	258	3.3e-35	122.6	0	1	1	2.5e-36	5.2e-35	122	0	6	255	52	310	47	312	0.91	96.8992
	Phvul.004G010400.1	-	519	PK_Tyr_Ser-Thr	PF07714.22	258	1.7e-33	117	0	1	1	1.1e-34	2.3e-33	116.6	0	6	255	89	335	84	337	0.85	96.8992
	Phvul.007G243100.1	-	577	PK_Tyr_Ser-Thr	PF07714.22	258	9e-33	114.7	0	1	1	6.3e-34	1.3e-32	114.1	0	2	251	124	376	123	382	0.86	96.8992
	Phvul.010G117600.1	-	588	PK_Tyr_Ser-Thr	PF07714.22	258	1.3e-32	114.1	0	1	1	8.8e-34	1.8e-32	113.7	0	2	251	137	389	136	395	0.88	96.8992
	Phvul.001G002900.1	-	511	PK_Tyr_Ser-Thr	PF07714.22	258	8.7e-26	91.8	0.3	1	1	7e-27	1.4e-25	91.1	0	2	251	74	319	73	325	0.86	96.8992
	Phvul.002G117600.1	-	875	PK_Tyr_Ser-Thr	PF07714.22	258	2.1e-25	90.5	0	1	1	1.6e-26	3.4e-25	89.9	0	4	253	465	732	462	736	0.75	96.8992
	Phvul.009G023800.1	-	904	PK_Tyr_Ser-Thr	PF07714.22	258	6.6e-20	72.5	0	1	1	1.4e-20	2.8e-19	70.4	0	7	256	521	794	516	796	0.8	96.8992
	Phvul.009G167600.3	-	657	PK_Tyr_Ser-Thr	PF07714.22	258	1.1e-19	71.8	0	1	1	8.8e-21	1.8e-19	71.1	0	6	255	382	638	377	641	0.8	96.8992
	Phvul.009G167600.1	-	763	PK_Tyr_Ser-Thr	PF07714.22	258	1.4e-19	71.4	0	1	1	1.2e-20	2.5e-19	70.6	0	6	255	488	744	483	747	0.8	96.8992
	Phvul.009G167600.2	-	763	PK_Tyr_Ser-Thr	PF07714.22	258	1.4e-19	71.4	0	1	1	1.2e-20	2.5e-19	70.6	0	6	255	488	744	483	747	0.8	96.8992
	Phvul.002G311000.1	-	416	PK_Tyr_Ser-Thr	PF07714.22	258	1.2e-14	55.2	0	1	1	8e-16	1.6e-14	54.8	0	2	251	10	266	9	273	0.8	96.8992
	Phvul.002G311000.2	-	416	PK_Tyr_Ser-Thr	PF07714.22	258	1.2e-14	55.2	0	1	1	8e-16	1.6e-14	54.8	0	2	251	10	266	9	273	0.79	96.5116
	Phvul.004G154500.1	-	635	PK_Tyr_Ser-Thr	PF07714.22	258	9.9e-81	271.8	0.3	1	2	8.3e-32	1.7e-30	107.2	0	9	257	53	318	46	319	0.92	96.5116
	Phvul.004G039800.1	-	813	PK_Tyr_Ser-Thr	PF07714.22	258	4.1e-50	171.5	0	1	1	3.9e-51	8e-50	170.6	0	7	255	523	786	517	789	0.92	96.5116
	Phvul.004G039700.1	-	801	PK_Tyr_Ser-Thr	PF07714.22	258	1.3e-49	169.8	0	1	1	1.2e-50	2.6e-49	168.9	0	7	255	511	774	507	777	0.9	96.5116
	Phvul.004G039900.1	-	829	PK_Tyr_Ser-Thr	PF07714.22	258	4.5e-49	168.1	0	1	1	3.4e-50	7e-49	167.5	0	7	255	512	775	508	778	0.87	96.5116
	Phvul.008G082400.1	-	898	PK_Tyr_Ser-Thr	PF07714.22	258	5.2e-48	164.6	0	1	1	4.9e-49	1e-47	163.7	0	7	255	546	808	541	811	0.86	96.5116
	Phvul.008G081000.1	-	899	PK_Tyr_Ser-Thr	PF07714.22	258	5.9e-48	164.4	0	1	1	5.7e-49	1.2e-47	163.4	0	7	255	547	809	542	812	0.86	96.5116
	Phvul.005G085600.1	-	840	PK_Tyr_Ser-Thr	PF07714.22	258	4.8e-47	161.5	0	1	1	3.3e-48	6.7e-47	161	0	6	254	504	765	499	769	0.86	96.5116
	Phvul.005G085600.2	-	840	PK_Tyr_Ser-Thr	PF07714.22	258	4.8e-47	161.5	0	1	1	3.3e-48	6.7e-47	161	0	6	254	504	765	499	769	0.88	96.5116
	Phvul.004G040000.1	-	819	PK_Tyr_Ser-Thr	PF07714.22	258	1.7e-46	159.6	0	1	1	1.4e-47	2.8e-46	158.9	0	7	255	502	765	498	768	0.82	96.5116
	Phvul.003G062600.1	-	651	PK_Tyr_Ser-Thr	PF07714.22	258	3.2e-46	158.7	0	1	1	2.3e-47	4.7e-46	158.2	0	4	252	328	594	325	600	0.95	96.5116
	Phvul.009G239700.1	-	380	PK_Tyr_Ser-Thr	PF07714.22	258	1.8e-45	156.3	0	1	1	1.5e-46	3e-45	155.5	0	5	253	94	355	91	359	0.88	96.5116
	Phvul.010G120500.1	-	627	PK_Tyr_Ser-Thr	PF07714.22	258	1.2e-44	153.6	0	1	1	9.4e-46	1.9e-44	152.9	0	6	254	17	264	13	267	0.88	96.5116
	Phvul.005G156500.1	-	493	PK_Tyr_Ser-Thr	PF07714.22	258	4.6e-42	145.1	0	1	1	5.1e-43	1.1e-41	143.9	0	6	254	224	477	219	480	0.83	96.5116
	Phvul.009G079300.1	-	718	PK_Tyr_Ser-Thr	PF07714.22	258	1e-39	137.4	0	1	1	9.5e-41	2e-39	136.5	0	4	252	411	664	408	671	0.83	96.5116
[truncated: 808 more rows]

## Sheet: Table S3
Table S3. Annotation of the WAK domain (PF08488) in WAK/WAKL proteins from Phaseolus vulgaris.
[truncated: 10 more rows]

[truncated: 14 more sheets: Table S4, Table S5, Table S6, Table S7, Table S8, Table S9, Table S10, Table S11, Table S12, Table S13, Table S14, Table S15, Table S16, Table S17]
